# Supplementary material for: Drug target prediction through deep learning functional representation of gene signatures
Source: Research Square preprint supplement (doi:10.21203/rs.3.rs-3371688/v1), 2023-09-28
Supplement: Supplementary file 1 [file 156063bb26150f40da3163e5.xlsx]

## Sheet: Table S7. KinaseAssays
Table S7. Summary of final reaction conditions
Enzyme	Plate color	Reaction Buffer	[Enzyme]	[ATP]	Substrate / [Conc]	Reaction time	HTRF Detection Reagents
ABL12	Black	HEPES, pH 7.1 (50 mM) MgCl2 (10 mM) MnCl2 (2 mM) DTT (2.5 mM) BSA (0.01 %) Na3VO4 (100 µM)	300 pM	0.1 µM	Biotin-Lck peptide (see note*) / 1 µM	60 min.	MAb PT66-K1 (170 ng/mL) SAXL-6651 (21 nM)
B-Raf3	White	MOPS, pH 7.2 (20 mM) MgCl2 (10 mM) β-glycerol phosphate (5 mM) EGTA (0.005 %) Na3VO4 (1 mM) DTT (1 mM) Triton X-100 (0.01 %)	150 pM	10 µM	MEK1 (kinase dead)-Avi tag3 / 0.025 µM	60 min.	anti-phospho-MEK1/2 (S217/221)-K1 (125 ng/mL) SAXL-6651 (21 nM)
CDK4:CCND13	White	HEPES, pH 7.5 (20 mM) MgCl2 (10 mM) DTT (1 mM) Na3VO4 (100 µM) BSA (0.01 %) Tween20 (0.005 %)	10 pM	300 µM	biotin-Rb3 / 0.2 µM	60 min.	phospho-Rb (S670) mAb-K1 (500 pM) SAXL-6651 (21 nM)
Kit2	White	HEPES, pH 7.0 (50 mM) MgCl2 (10 mM) DTT (2.5 mM) MnCl2 (2 mM) BSA (0.01 %) Na3VO4 (100 µM)	1.9 pM	250 µM	biotin-FGFR4 peptide / 1 µM	80 min.	MAb PT66-K1 (125 ng/mL) SAXL-6651 (21 nM)
EGFR4	White	HEPES, pH 7.1 (50 mM) MgCl2 (10 mM) MnCl2 (2 mM) TCEP (1 mM) BSA (0.01 %) Na3VO4 (100 µM)	66.5 pM	1 µM	Biotin-Lck peptide / 1 µM	60 min.	MAb PT66-K1 (125 ng/mL) SAXL-6651 (21 nM)
FLT-32	Black	HEPES, pH 7.1 (50 mM) MgCl2 (10 mM) MnCl2 (2 mM) DTT (2.5 mM) BSA (0.01 %) Na3VO4 (100 µM)	50 pM	100 µM	Biotin-Lck peptide / 1 µM	60 min.	MAb PT66-K1 (125 ng/mL) SAXL-6651 (21 nM)
IGF1R2	White	HEPES, pH 7.4 (50 mM) MgCl2 (10 mM) BSA (0.1 %) DTT (2.5 mM) MnCl2 (2 mM) Na3VO4 (100 µM)	4 pM	10 µM	Biotin-Lck peptide / 1 µM	60 min.	MAb PT66-K1 (250 ng/mL) SAXL-6651 (62 nM)
INSR3	Black	HEPES, pH 7.1 (50 mM) MgCl2 (10 mM) MnCl2 (2 mM) DTT (2.5 mM) BSA (0.01 %) Na3VO4 (100 µM)	0.7 pM	10 µM	Biotin-Lck peptide / 1 µM	60 min.	MAb PT66-K1 (125 ng/mL) SAXL-6651 (21 nM)
KDR3	White	HEPES, pH 7.0 (50 mM) MgCl2 (10 mM) BSA (0.1 %) DTT (2.5 mM) MnCl2 (2 mM) Na3VO4 (100 µM)	2 µg/mL	10 µM	Biotin-Lck peptide / 1 µM	60 min.	MAb PT66-K1 (250 ng/mL) SAXL-6651 (62 nM)
LCK2	Black	HEPES, pH 7.1 (50 mM) MgCl2 (10 mM) MnCl2 (2 mM) DTT (2.5 mM) BSA (0.01 %) Na3VO4 (100 µM)	400 pM	5 µM	Biotin-Lck peptide / 1 µM	60 min.	MAb PT66-K1 (125 ng/mL) SAXL-6651 (21 nM)
LynA5	Black	MOPSO, pH 6.5 (50 mM) MgCl2 (10 mM) DTT (2.5 mM) MnCl2 (2 mM) Na3VO4 (100 µM) BSA (0.01 %)	100 pM	5 µM	Biotin-Lck peptide / 1 µM	60 min.	MAb PT66-K1 (125 ng/mL) SAXL-6651 (21 nM)
p38α2	White	MOPS, pH 7.2 (20 mM) MgCl2 (10 mM) β-glycerol phosphate (5 mM) EGTA (5 mM) Na3VO4 (100 µM) DTT (1 mM) Triton X-100 (0.01 %)	10000 pM	100 µM	biotin-MBP peptide / 0.5 µM	60 min.	α-phospho-MBP-K6 (31.3 ng/mL) SAXL-6651 (42 nM)
PKCα2	White	Lipid Activator7 (1 X) MOPS, pH 7.2 (20 mM) β-glycerol phosphate (10 mM) MgCl2 (10 mM) EGTA, pH 8.0 (5 mM) Na3VO4 (1 mM) DTT (1 mM) CaCl2 (1 mM) Triton X-100 (0.01 %)	77.5 pM	50 µM	biotin-cdc25 peptide / 2 µM	60 min.	Phospho-(Ser) 14-3-3 Binding Motif mAb-K6 (250 ng/mL) SAXL-6651 (62 nM)
RET2	White	HEPES, pH 7.1 (50 mM) MgCl2 (10 mM) MnCl2 (2 mM) DTT (2.5 mM) BSA (0.01 %) Na3VO4 (100 µM)	1000 pM	1 µM	Biotin-Lck peptide / 1 µM	80 min.	MAb PT66-K1 (170 ng/mL) SAXL-6651 (21 nM)
Src5	Black	MOPSO, pH 6.5 (50 mM) MgCl2 (10 mM) DTT (2.5 mM) MnCl2 (2 mM) Na3VO4 (100 µM) BSA (0.01 %)	50 pM	5 µM	Biotin-Lck peptide / 1 µM	60 min.	MAb PT66-K1 (125 ng/mL) SAXL-6651 (21 nM)
AurA2	White	KinEase Enzymatic Buffer1 (1 X) MgCl2(10 mM) DTT (2 mM)	10000 pM	10 µM	KinEASE STK Substrate-21 / 1 µM	60 min.	STK Antibody-K1 (0.125 X) SAXL-6651 (31 nM)
GSK3β8	White	HEPES, pH 7.5 (50 mM) MgCl2 (10 mM) β-glycerol phosphate (5 mM) EGTA (1 mM) DTT (2 mM) Tween 20 (0.01 %)	1000 pM	10 µM	µLight-GS peptide1 / 0.05 µM	60 min.	LANCE Ultra Europium anti-phospho-Glycogen Synthase (Ser641)1 (2 nM)
PDGFRα2	Black	KinEase Enzymatic Buffer1 (1 X) MgCl2(10 mM) DTT (2 mM)	1000 pM	10 µM	KinEASE TK Substrate1 / 1 µM	90 min.	TK Antibody-K1 (0.0625 X) SAXL-6651 (62 nM)
ROCK12	Black	KinEase Enzymatic Buffer1 (1 X) MgCl2(10 mM) DTT (2 mM)	3000 pM	1 µM	KinEASE STK Substrate-21 / 1 µM	60 min.	STK Antibody-K1 (0.125 X) SAXL-6651 (31.3 nM)
Footnote:
1	Purchased from PerkinElmer, including all KinEASE TK and STK reagent kits and LANCE reagent kit
2	Purchased from ThermoFisher
3	Protein construct expressed and purified in-house
4	Gift from Micheal Eck's lab at Harvard
5	Purchased from Carna Biosciences
6	Antibody supplied by Cell Signaling Technologies; and custom labelled by PerkinElmer
7	Purchased from Sigma Aldrich
8	Purchased from BPS Bioscience
note *	Y. Jia, M. Manuia and J. Juarez. HTRF Kinase Assay Development and Methods in Inhibitor Characterization. Methods Mol Biol. (2016) 1360, 1-18
