# Supplementary material for: Drug target prediction through deep learning functional representation of gene signatures
Source: Research Square preprint supplement (doi:10.21203/rs.3.rs-3371688/v1), 2023-09-28
Supplement: Supplementary file 2 [file 4020cef6424707d4610fdb97.xlsx]

## Sheet: Table S2.PredictedNetworkRele
QueryPertID	cpd_name	cpd_broad	GeneID	Symbol	gene_description	Validation	Probability_L	Probability_Q	Probability_Best_pQSAR	Probability_SAR	Probability_PSP	Probability_NCI60	Probability_LQ (Combined Model)	Validation_Code	Validation_L1000	Validation_pQSAR	Validation_NCI60	Validation_PSP	Validation_StructureLikely	Validation_StructureSure	Validation_pIC50	Validation_Known	Pct	KnownTarget	y	Supported by Model L, pQSAR (Q), & Combined (LQ)	Supported by Ortholognal Data
BRD-A34806832	proscillaridin	ATPase inhibitor, ATP1A1	476	ATP1A1	ATPase Na+/K+ transporting subunit alpha 1	Known	0.9378	0.9518	0.9629	0.6913	0.6324	0.8499	0.9999	8	1	1	1	0	0	0	0	1	0.0003	Y	1	TRUE	TRUE
BRD-K36616567	doxepin	histamine receptor antagonist|adrenergic transmitter uptake inhibitor|histamine receptor inhibitor|norepinephrine reputake inhibitor|serotonin reuptake inhibitor|tricyclic antidepressant, HRH1|HRH2|SLC6A2|SLC6A4|ADRA1A|ADRA1B|ADRA1D|ADRA2A|ADRA2B|ADRA2C|CHRM1|CHRM2|CHRM3|CHRM4|CHRM5|CYP2C19|DRD2|HRH4|HTR1A|HTR2A|HTR2B|HTR2C|HTR6|KCNH2|SLC6A3	3269	HRH1	histamine receptor H1	Known	0.946	0.9516	0.9756	0.9908	0.5	0.5	0.9999	8	1	1	0	0	1	1	1	1	0.0002	Y	1	TRUE	TRUE
BRD-K38003476	clocortolone	glucocorticoid receptor agonist, NR3C1|PLA2G1B	2908	NR3C1	nuclear receptor subfamily 3 group C member 1	Known	0.9259	0.9548	0.9555	0.9908	0.5	0.5	0.9999	8	1	1	0	0	1	1	0	1	0.0005	Y	1	TRUE	TRUE
BRD-K81925854	clocortolone	glucocorticoid receptor agonist, NR3C1|PLA2G1B	1577	CYP3A5	cytochrome P450 family 3 subfamily A member 5	pQSAR	0.9378	0.9548	0.9548	0.5549	0.5	0.5	0.9999	2	1	1	0	0	0	0	0	0	0.0003	N	0	TRUE	FALSE
BRD-A01346607	flumetasone	glucocorticoid receptor agonist, NR3C1|PLA2G1B	2908	NR3C1	nuclear receptor subfamily 3 group C member 1	Known	0.9259	0.9469	0.9706	0.9908	0.5	0.8919	0.9998	8	1	1	1	0	1	1	0	1	0.0005	Y	1	TRUE	TRUE
BRD-A01643550	prednisolone	glucocorticoid receptor agonist, NR3C1|NR3C2|SERPINA6	2908	NR3C1	nuclear receptor subfamily 3 group C member 1	Known	0.946	0.9405	0.969	0.9238	0.5	0.5	0.9998	8	1	1	0	0	1	0	0	1	0.0002	Y	1	TRUE	TRUE
BRD-A16478930	amcinonide	corticosteroid agonist|cytochrome P450 inhibitor|glucocorticoid receptor agonist|immunosuppressant, NR3C1|ANXA1	2908	NR3C1	nuclear receptor subfamily 3 group C member 1	Known	0.9259	0.9474	0.9661	0.9908	0.5	0.5	0.9998	8	1	1	0	0	1	1	1	1	0.0005	Y	1	TRUE	TRUE
BRD-A20126139	medrysone	corticosteroid hormone receptor agonist|glucocorticoid receptor agonist, NR3C1	2908	NR3C1	nuclear receptor subfamily 3 group C member 1	Known	0.9259	0.9469	0.9493	0.9908	0.5	0.5	0.9998	8	1	1	0	0	1	1	1	1	0.0005	Y	1	TRUE	TRUE
BRD-A38749782	fludrocortisone	glucocorticoid receptor agonist|mineralocorticoid receptor agonist, NR3C2|AR|NR3C1	2908	NR3C1	nuclear receptor subfamily 3 group C member 1	Known	0.946	0.9468	0.967	0.9908	0.5	0.5	0.9998	8	1	1	0	0	1	1	1	1	0.0002	Y	1	TRUE	TRUE
BRD-A46186775	hydrocortisone	corticosteroid agonist|glucocorticoid receptor agonist|immunosuppressant|interleukin receptor antagonist, ANXA1|NOS2|NR3C1|NR3C2	2908	NR3C1	nuclear receptor subfamily 3 group C member 1	Known	0.9168	0.9464	0.9666	0.8939	0.5	0.5	0.9998	8	1	1	0	0	1	0	0	1	0.0007	Y	1	TRUE	TRUE
BRD-A49765801	fludroxycortide	corticosteroid|glucocorticoid receptor agonist, NR3C1|SERPINA6	2908	NR3C1	nuclear receptor subfamily 3 group C member 1	Known	0.9259	0.9474	0.968	0.9908	0.5	0.5	0.9998	8	1	1	0	0	1	1	0	1	0.0005	Y	1	TRUE	TRUE
BRD-A52193669	withaferin-a	acetylcholinesterase inhibitor|butyrylcholinesterase inhibitors|IKK inhibitor|NFkB pathway inhibitor|PKC inhibitor, ACHE|BCHE|IKBKB	476	ATP1A1	ATPase Na+/K+ transporting subunit alpha 1	pQSAR	0.9259	0.944	0.944	0.3265	0.5	0.5	0.9998	2	1	1	0	0	0	0	0	0	0.0005	N	0	TRUE	FALSE
BRD-A71459254	cymarin	ATPase inhibitor, ATP1A1	476	ATP1A1	ATPase Na+/K+ transporting subunit alpha 1	Known	0.9259	0.9519	0.9696	0.9908	0.7891	0.5	0.9998	8	1	1	0	0	1	1	0	1	0.0005	Y	1	TRUE	TRUE
BRD-A90131694	alclometasone	glucocorticoid receptor agonist|immunosuppressant, NR3C1|SERPINA6	2908	NR3C1	nuclear receptor subfamily 3 group C member 1	Known	0.9259	0.9473	0.9595	0.9908	0.5	0.5	0.9998	8	1	1	0	0	1	1	1	1	0.0005	Y	1	TRUE	TRUE
BRD-A92177080	betamethasone	corticosteroid agonist|glucocorticoid receptor agonist, NR3C1	2908	NR3C1	nuclear receptor subfamily 3 group C member 1	Known	0.946	0.9424	0.9772	0.9908	0.5	0.5	0.9998	8	1	1	0	0	1	1	0	1	0.0002	Y	1	TRUE	TRUE
BRD-A92439610	triamcinolone	antiinflammatory agent|corticosteroid agonist|corticosteroid binding globulin binder|corticosteroid hormone receptor agonist|cytochrome P450 inhibitor|glucocorticoid receptor agonist|immunosuppressant|immunosuppressive agent, NR3C1|CYP3A5|CYP3A7|SERPINA6	2908	NR3C1	nuclear receptor subfamily 3 group C member 1	Known	0.946	0.9439	0.9691	0.9908	0.5	0.5	0.9998	8	1	1	0	0	1	1	1	1	0.0002	Y	1	TRUE	TRUE
BRD-A93236127	digitoxin	ATPase inhibitor, ATP1A1	476	ATP1A1	ATPase Na+/K+ transporting subunit alpha 1	Known	0.9378	0.9449	0.9771	0.9908	0.8421	0.8919	0.9998	8	1	1	1	1	1	1	0	1	0.0003	Y	1	TRUE	TRUE
BRD-K07325606	hispidin	beta secretase inhibitor|cyclooxygenase inhibitor|HIV integrase inhibitor|PKC inhibitor|prolyl endopeptidase inhibitor|xanthine oxidase inhibitor, PREP|PRKCB|PTGS2|XDH	351	APP	amyloid beta precursor protein	pQSAR	0.946	0.9398	0.9398	0.5685	0.5	0.5	0.9998	2	1	1	0	0	0	0	0	0	0.0002	N	0	TRUE	FALSE
BRD-K23714869	triamcinolone	antiinflammatory agent|corticosteroid agonist|corticosteroid binding globulin binder|corticosteroid hormone receptor agonist|cytochrome P450 inhibitor|glucocorticoid receptor agonist|immunosuppressant|immunosuppressive agent, NR3C1|CYP3A5|CYP3A7|SERPINA6	2908	NR3C1	nuclear receptor subfamily 3 group C member 1	Known	0.9378	0.9458	0.9769	0.9908	0.5	0.5	0.9998	8	1	1	0	0	1	1	0	1	0.0003	Y	1	TRUE	TRUE
BRD-K29173907	isoflupredone	glucocorticoid receptor agonist, NR3C1	2908	NR3C1	nuclear receptor subfamily 3 group C member 1	Known	0.9259	0.9453	0.9694	0.9908	0.5	0.5	0.9998	8	1	1	0	0	1	1	0	1	0.0005	Y	1	TRUE	TRUE
BRD-K30697463	desoximetasone	glucocorticoid receptor agonist, NR3C1|PLA2G1B	2908	NR3C1	nuclear receptor subfamily 3 group C member 1	Known	0.9259	0.9517	0.9771	0.9908	0.5	0.5	0.9998	8	1	1	0	0	1	1	0	1	0.0005	Y	1	TRUE	TRUE
BRD-K31627533	rimexolone	glucocorticoid receptor agonist|immunosuppressant|mineralocorticoid receptor agonist, NR3C1|SERPINA6	2908	NR3C1	nuclear receptor subfamily 3 group C member 1	Known	0.9259	0.9519	0.9646	0.9908	0.5	0.5	0.9998	8	1	1	0	0	1	1	1	1	0.0005	Y	1	TRUE	TRUE
BRD-K33312228	halometasone	cytochrome P450 inhibitor|glucocorticoid receptor agonist|immunosuppressant, NR3C1	2908	NR3C1	nuclear receptor subfamily 3 group C member 1	Known	0.9259	0.9493	0.9695	0.8638	0.5	0.5	0.9998	8	1	1	0	0	1	0	1	1	0.0005	Y	1	TRUE	TRUE
BRD-K34817515	fluocinolone	corticosteroid agonist|glucocorticoid receptor agonist, NR3C1|SERPINA6	866	SERPINA6	serpin family A member 6	Known	0.9378	0.9412	0.9719	0.9908	0.5	0.5	0.9998	8	1	1	0	0	1	1	0	1	0.0003	Y	1	TRUE	TRUE
BRD-K35240538	methylprednisolone	glucocorticoid receptor agonist, NR3C1	2908	NR3C1	nuclear receptor subfamily 3 group C member 1	Known	0.9259	0.9475	0.9768	0.9908	0.5	0.8919	0.9998	8	1	1	1	0	1	1	1	1	0.0005	Y	1	TRUE	TRUE
BRD-K53737926	amitriptyline	norepinephrine inhibitor|serotonin receptor inhibitor|sigma receptor inhibitor, CHRM1|CHRM2|CHRM3|CHRM4|CHRM5|HRH1|HTR6|SLC6A2|SLC6A4|ADRA1A|ADRA1B|ADRA1D|ADRA2A|ADRB1|ADRB2|ADRB3|HRH2|HRH4|HTR1A|HTR1B|HTR1D|HTR2A|HTR2C|HTR7|KCNA1|KCND2|KCND3|KCNQ2|KCNQ3|NTRK1|NTRK2|OPRD1|OPRK1|OPRM1|SIGMAR1	3269	HRH1	histamine receptor H1	Known	0.8361	0.9572	0.9682	0.8273	0.5	0.5	0.9998	8	1	1	0	0	1	0	1	1	0.0056	Y	1	TRUE	TRUE
BRD-K58746048	flurandrenolide	glucocorticoid receptor agonist., NR3C1|SERPINA6	2908	NR3C1	nuclear receptor subfamily 3 group C member 1	Known	0.913	0.9474	0.968	0.9908	0.5	0.5	0.9998	8	1	1	0	0	1	1	0	1	0.0008	Y	1	TRUE	TRUE
BRD-K62310379	fluticasone	glucocorticoid receptor agonist, NR3C1|CYP3A5|CYP3A7|NR3C2|PGR|PLA2G4A	2908	NR3C1	nuclear receptor subfamily 3 group C member 1	Known	0.9259	0.9455	0.9755	0.9908	0.5	0.5	0.9998	8	1	1	0	0	1	1	0	1	0.0005	Y	1	TRUE	TRUE
BRD-K63606607	bufalin	ATPase inhibitor|chloride channel activator, ATP1A1	476	ATP1A1	ATPase Na+/K+ transporting subunit alpha 1	Known	0.9378	0.9442	0.9634	0.8734	0.5	0.5	0.9998	8	1	1	0	0	1	0	0	1	0.0003	Y	1	TRUE	TRUE
BRD-K71451869	halcinonide	glucocorticoid receptor agonist, NR3C1	1577	CYP3A5	cytochrome P450 family 3 subfamily A member 5	pQSAR	0.913	0.9488	0.962	0.7888	0.5	0.5	0.9998	2	1	1	0	0	0	0	0	0	0.0008	N	0	TRUE	FALSE
BRD-K71451869	halcinonide	glucocorticoid receptor agonist, NR3C1	866	SERPINA6	serpin family A member 6	pQSAR	0.9378	0.9434	0.962	0.7888	0.5	0.5	0.9998	2	1	1	0	0	0	0	0	0	0.0003	N	0	TRUE	FALSE
BRD-K97810537	beclometasone	glucocorticoid receptor agonist|corticosteroid hormone receptor agonist|immunosuppressant, NR3C1|CYP3A5|GPR97|SERPINA6	2908	NR3C1	nuclear receptor subfamily 3 group C member 1	Known	0.9259	0.9506	0.9762	0.9908	0.5	0.5	0.9998	8	1	1	0	0	1	1	1	1	0.0005	Y	1	TRUE	TRUE
BRD-A01346607	flumetasone	glucocorticoid receptor agonist, NR3C1|PLA2G1B	866	SERPINA6	serpin family A member 6	StructureLikely	0.8927	0.9469	0.9674	0.8207	0.5	0.7913	0.9997	5	1	1	0	0	1	0	0	0	0.0015	N	0	TRUE	TRUE
BRD-A02180903	betamethasone	corticosteroid agonist|glucocorticoid receptor agonist, NR3C1	2908	NR3C1	nuclear receptor subfamily 3 group C member 1	Known	0.9259	0.9371	0.9771	0.9908	0.5	0.8919	0.9997	8	1	1	1	0	1	1	0	1	0.0005	Y	1	TRUE	TRUE
BRD-A15297126	fluocinonide	corticosteroid agonist|corticosteroid hormone receptor agonist, NR3C1|SERPINA6|SMO	2908	NR3C1	nuclear receptor subfamily 3 group C member 1	Known	0.8927	0.9489	0.9719	0.9908	0.5	0.5	0.9997	8	1	1	0	0	1	1	0	1	0.0015	Y	1	TRUE	TRUE
BRD-A17448384	beclometasone	glucocorticoid receptor agonist|corticosteroid hormone receptor agonist|immunosuppressant, NR3C1|CYP3A5|GPR97|SERPINA6	2908	NR3C1	nuclear receptor subfamily 3 group C member 1	Known	0.9259	0.9369	0.9692	0.9146	0.5	0.5	0.9997	8	1	1	0	0	1	0	0	1	0.0005	Y	1	TRUE	TRUE
BRD-A25143711	hydrocortisone	corticosteroid agonist|glucocorticoid receptor agonist|immunosuppressant|interleukin receptor antagonist, ANXA1|NOS2|NR3C1|NR3C2	2908	NR3C1	nuclear receptor subfamily 3 group C member 1	Known	0.9168	0.9449	0.9607	0.814	0.5	0.5	0.9997	8	1	1	0	0	1	0	0	1	0.0007	Y	1	TRUE	TRUE
BRD-A26095496	clobetasol	glucocorticoid receptor agonist, NR3C1|PLA2G1B	2908	NR3C1	nuclear receptor subfamily 3 group C member 1	Known	0.9259	0.9369	0.9765	0.9908	0.5	0.5	0.9997	8	1	1	0	0	1	1	1	1	0.0005	Y	1	TRUE	TRUE
BRD-A27887842	prednisolone	glucocorticoid receptor agonist, NR3C1|NR3C2|SERPINA6	2908	NR3C1	nuclear receptor subfamily 3 group C member 1	Known	0.8783	0.9471	0.969	0.9908	0.5	0.5	0.9997	8	1	1	0	0	1	1	0	1	0.0022	Y	1	TRUE	TRUE
BRD-A28746609	paclitaxel	tubulin inhibitor|microtubule stabilizing agent|microtubule stimulant|P glycoprotein inhibitor|taxane, TUBB|NR1I2|ABCB1|BCL2|CYP2C8|MAP2|MAP4|MAPT|TLR4|TUBB1	7846	TUBA1A	tubulin alpha 1a	pQSAR	0.946	0.9354	0.9354	0.1338	0.5	0.7176	0.9997	2	1	1	0	0	0	0	0	0	0.0002	N	0	TRUE	FALSE
BRD-A33711280	metixene	acetylcholine receptor antagonist, CHRM5|CHRM1|CHRM2|CHRM3|CHRM4	3269	HRH1	histamine receptor H1	pQSAR	0.8881	0.9498	0.9498	0.5595	0.5	0.5	0.9997	2	1	1	0	0	0	0	0	0	0.0017	N	0	TRUE	FALSE
BRD-A35108200	dexamethasone	glucocorticoid receptor agonist|corticosteroid agonist|immunosuppressant, ANXA1|CYP3A4|CYP3A5|NOS2|NR0B1|NR3C1|NR3C2	2908	NR3C1	nuclear receptor subfamily 3 group C member 1	Known	0.946	0.9355	0.9769	0.9908	0.5	0.8919	0.9997	8	1	1	1	0	1	1	0	1	0.0002	Y	1	TRUE	TRUE
BRD-A36010170	amcinonide	corticosteroid agonist|cytochrome P450 inhibitor|glucocorticoid receptor agonist|immunosuppressant, NR3C1|ANXA1	2908	NR3C1	nuclear receptor subfamily 3 group C member 1	Known	0.8927	0.9474	0.9661	0.9908	0.5	0.5	0.9997	8	1	1	0	0	1	1	1	1	0.0015	Y	1	TRUE	TRUE
BRD-A37780065	triamcinolone	antiinflammatory agent|corticosteroid agonist|corticosteroid binding globulin binder|corticosteroid hormone receptor agonist|cytochrome P450 inhibitor|glucocorticoid receptor agonist|immunosuppressant|immunosuppressive agent, NR3C1|CYP3A5|CYP3A7|SERPINA6	2908	NR3C1	nuclear receptor subfamily 3 group C member 1	Known	0.8881	0.9458	0.9769	0.9908	0.5	0.8919	0.9997	8	1	1	1	0	1	1	0	1	0.0017	Y	1	TRUE	TRUE
BRD-A48180038	trihexyphenidyl	anticholinergic, CHRM1|CHRM2|CHRM3|CHRM4|CHRM5	3269	HRH1	histamine receptor H1	pQSAR	0.9378	0.9351	0.9351	0.5685	0.5	0.5	0.9997	2	1	1	0	0	0	0	0	0	0.0003	N	0	TRUE	FALSE
BRD-A49765801	fludroxycortide	corticosteroid|glucocorticoid receptor agonist, NR3C1|SERPINA6	866	SERPINA6	serpin family A member 6	Known	0.9168	0.9385	0.9618	0.9908	0.5	0.5	0.9997	8	1	1	0	0	1	1	0	1	0.0007	Y	1	TRUE	TRUE
BRD-A65449987	flunisolide	cytochrome P450 inhibitor|corticosteroid agonist|corticosteroid hormone receptor agonist|glucocorticoid receptor agonist|immunosuppressant, NR3C1	2908	NR3C1	nuclear receptor subfamily 3 group C member 1	Known	0.9259	0.9422	0.9766	0.9908	0.5	0.5	0.9997	8	1	1	0	0	1	1	0	1	0.0005	Y	1	TRUE	TRUE
BRD-A68930007	ouabain	ATPase inhibitor|alpha subunit binder, ATP1A1|ATP1A2|ATP1A3|ATP1A4|ATP1B1|ATP1B2|ATP1B3|ATP1B4|FXYD2	476	ATP1A1	ATPase Na+/K+ transporting subunit alpha 1	Known	0.946	0.9332	0.9755	0.9908	0.7699	0.8919	0.9997	8	1	1	1	0	1	1	0	1	0.0002	Y	1	TRUE	TRUE
BRD-A75172220	hydrocortisone	corticosteroid agonist|glucocorticoid receptor agonist|immunosuppressant|interleukin receptor antagonist, ANXA1|NOS2|NR3C1|NR3C2	2908	NR3C1	nuclear receptor subfamily 3 group C member 1	Known	0.8881	0.9459	0.9772	0.9908	0.5	0.8919	0.9997	8	1	1	1	0	1	1	1	1	0.0017	Y	1	TRUE	TRUE
BRD-A92439610	triamcinolone	antiinflammatory agent|corticosteroid agonist|corticosteroid binding globulin binder|corticosteroid hormone receptor agonist|cytochrome P450 inhibitor|glucocorticoid receptor agonist|immunosuppressant|immunosuppressive agent, NR3C1|CYP3A5|CYP3A7|SERPINA6	866	SERPINA6	serpin family A member 6	Known	0.9168	0.9439	0.9691	0.9908	0.5	0.5	0.9997	8	1	1	0	0	1	1	0	1	0.0007	Y	1	TRUE	TRUE
BRD-A93424738	dexamethasone	glucocorticoid receptor agonist|corticosteroid agonist|immunosuppressant, ANXA1|CYP3A4|CYP3A5|NOS2|NR0B1|NR3C1|NR3C2	2908	NR3C1	nuclear receptor subfamily 3 group C member 1	Known	0.9259	0.9413	0.977	0.9908	0.5	0.5	0.9997	8	1	1	0	0	1	1	1	1	0.0005	Y	1	TRUE	TRUE
BRD-K26241953	piceatannol	syk inhibitor|cyclooxygenase inhibitor|nitric oxide synthase inhibitor|SIRT activator|tyrosinase inhibitor|tyrosine kinase inhibitor, ATP5A1|ATP5B|ATP5C1|IRF3|PTGS2|SIRT1|SYK|TYR	1956	EGFR	epidermal growth factor receptor	pQSAR	0.8561	0.9505	0.9548	0.6205	0.5	0.5	0.9997	2	1	1	0	0	0	0	0	0	0.0037	N	0	TRUE	FALSE
BRD-K30697463	desoximetasone	glucocorticoid receptor agonist, NR3C1|PLA2G1B	866	SERPINA6	serpin family A member 6	pQSAR	0.8317	0.9517	0.9653	0.7576	0.5	0.5	0.9997	2	1	1	0	0	0	0	0	0	0.0061	N	0	TRUE	FALSE
BRD-K33312228	halometasone	cytochrome P450 inhibitor|glucocorticoid receptor agonist|immunosuppressant, NR3C1	1577	CYP3A5	cytochrome P450 family 3 subfamily A member 5	pQSAR	0.9003	0.9439	0.962	0.7606	0.5	0.5	0.9997	2	1	1	0	0	0	0	0	0	0.0012	N	0	TRUE	FALSE
BRD-K34817515	fluocinolone	corticosteroid agonist|glucocorticoid receptor agonist, NR3C1|SERPINA6	2908	NR3C1	nuclear receptor subfamily 3 group C member 1	Known	0.913	0.9413	0.9719	0.9908	0.5	0.5	0.9997	8	1	1	0	0	1	1	0	1	0.0008	Y	1	TRUE	TRUE
BRD-K39983086	loteprednol	corticosteroid agonist|phospholipase inhibitor, NR3C1	2908	NR3C1	nuclear receptor subfamily 3 group C member 1	Known	0.9259	0.9416	0.9626	0.8673	0.5	0.5	0.9997	8	1	1	0	0	1	0	1	1	0.0005	Y	1	TRUE	TRUE
BRD-K45149020	amcinonide	corticosteroid agonist|cytochrome P450 inhibitor|glucocorticoid receptor agonist|immunosuppressant, NR3C1|ANXA1	2908	NR3C1	nuclear receptor subfamily 3 group C member 1	Known	0.886	0.9474	0.9661	0.9908	0.5	0.5	0.9997	8	1	1	0	0	1	1	1	1	0.0018	Y	1	TRUE	TRUE
BRD-K47278471	diphenhydramine	histamine receptor antagonist, HRH1	1131	CHRM3	cholinergic receptor muscarinic 3	pQSAR	0.8783	0.9453	0.9453	0.5549	0.5	0.5	0.9997	2	1	1	0	0	0	0	0	0	0.0022	N	0	TRUE	FALSE
BRD-K49657628	tyrphostin-AG-18	epidermal growth factor receptor (EGFR) inhibitor|tyrosine kinase inhibitor, EGFR	5743	PTGS2	prostaglandin-endoperoxide synthase 2	pQSAR	0.8783	0.9515	0.9548	0.6205	0.5	0.5	0.9997	2	1	1	0	0	0	0	0	0	0.0022	N	0	TRUE	FALSE
BRD-K59058766	chlorprothixene	dopamine receptor|dopamine receptor antagonist, DRD2|CHRM1|CHRM2|CHRM3|CHRM4|CHRM5|DRD1|DRD3|HRH1|HTR2A|HTR2B|HTR2C	150	ADRA2A	adrenoceptor alpha 2A	StructureLikely	0.9095	0.9441	0.9516	0.8365	0.5	0.5	0.9997	5	1	1	0	0	1	0	0	0	0.0009	N	0	TRUE	TRUE
BRD-K59058766	chlorprothixene	dopamine receptor|dopamine receptor antagonist, DRD2|CHRM1|CHRM2|CHRM3|CHRM4|CHRM5|DRD1|DRD3|HRH1|HTR2A|HTR2B|HTR2C	3269	HRH1	histamine receptor H1	Known	0.884	0.9461	0.9766	0.9908	0.5	0.5	0.9997	8	1	1	0	0	1	1	0	1	0.0019	Y	1	TRUE	TRUE
BRD-K59058766	chlorprothixene	dopamine receptor|dopamine receptor antagonist, DRD2|CHRM1|CHRM2|CHRM3|CHRM4|CHRM5|DRD1|DRD3|HRH1|HTR2A|HTR2B|HTR2C	3358	HTR2C	5-hydroxytryptamine receptor 2C	Known	0.8801	0.9462	0.9766	0.9908	0.5	0.5	0.9997	8	1	1	0	0	1	1	0	1	0.0021	Y	1	TRUE	TRUE
BRD-K77554836	triamcinolone	antiinflammatory agent|corticosteroid agonist|corticosteroid binding globulin binder|corticosteroid hormone receptor agonist|cytochrome P450 inhibitor|glucocorticoid receptor agonist|immunosuppressant|immunosuppressive agent, NR3C1|CYP3A5|CYP3A7|SERPINA6	2908	NR3C1	nuclear receptor subfamily 3 group C member 1	Known	0.884	0.9459	0.9769	0.9908	0.5	0.8919	0.9997	8	1	1	1	0	1	1	0	1	0.0019	Y	1	TRUE	TRUE
BRD-K82481048	prednisolone	glucocorticoid receptor agonist, NR3C1|NR3C2|SERPINA6	2908	NR3C1	nuclear receptor subfamily 3 group C member 1	Known	0.886	0.9486	0.9768	0.9908	0.5	0.8919	0.9997	8	1	1	1	0	1	1	0	1	0.0018	Y	1	TRUE	TRUE
BRD-A07932845	metitepine	anti-HCVE2, HTR5A|HTR6|HTR7|HTR1A|HTR1B|HTR1D|HTR1E|HTR1F|HTR2A|HTR2B|HTR2C	1812	DRD1	dopamine receptor D1	pQSAR	0.913	0.9384	0.9384	0.6363	0.5	0.5	0.9996	2	1	1	0	0	0	0	0	0	0.0008	N	0	TRUE	FALSE
BRD-A16478930	amcinonide	corticosteroid agonist|cytochrome P450 inhibitor|glucocorticoid receptor agonist|immunosuppressant, NR3C1|ANXA1	866	SERPINA6	serpin family A member 6	StructureLikely	0.8199	0.9474	0.9661	0.8465	0.5	0.5	0.9996	5	1	1	0	0	1	0	0	0	0.0076	N	0	TRUE	TRUE
BRD-A19195498	trimipramine	adrenergic transmitter uptake inhibitor|dopamine receptor|norepinephrine transporter inhibitor|serotonin transporter (SERT) inhibitor|serotonin uptake inhibitor|tricyclic antidepressant|tricyclic antidepressant (TCA), SLC6A2|SLC6A4|SLC6A3|ADRA1A|ADRA1B|ADRA2A|ADRA2B|ADRB1|ADRB2|ADRB3|CHRM1|CHRM2|CHRM3|CHRM4|CHRM5|DRD1|DRD2|DRD5|HRH1|HTR1A|HTR1D|HTR2A|HTR2C|HTR3A	1131	CHRM3	cholinergic receptor muscarinic 3	Known	0.7308	0.9544	0.9544	0.7376	0.5	0.5	0.9996	8	0	1	0	0	0	0	0	1	0.0301	Y	1	FALSE	TRUE
BRD-A38749782	fludrocortisone	glucocorticoid receptor agonist|mineralocorticoid receptor agonist, NR3C2|AR|NR3C1	1577	CYP3A5	cytochrome P450 family 3 subfamily A member 5	pQSAR	0.9062	0.9395	0.9536	0.6913	0.5	0.5	0.9996	2	1	1	0	0	0	0	0	0	0.001	N	0	TRUE	FALSE
BRD-A50157456	terbutaline	adrenergic receptor agonist, ADRB2	154	ADRB2	adrenoceptor beta 2	Known	0.8599	0.9464	0.9635	0.9908	0.5	0.5	0.9996	8	1	1	0	0	1	1	0	1	0.0034	Y	1	TRUE	TRUE
BRD-A56470328	fludrocortisone	glucocorticoid receptor agonist|mineralocorticoid receptor agonist, NR3C2|AR|NR3C1	2908	NR3C1	nuclear receptor subfamily 3 group C member 1	Known	0.8491	0.9468	0.967	0.9908	0.5	0.5	0.9996	8	1	1	0	0	1	1	1	1	0.0043	Y	1	TRUE	TRUE
BRD-A73635141	hydrocortisone	corticosteroid agonist|glucocorticoid receptor agonist|immunosuppressant|interleukin receptor antagonist, ANXA1|NOS2|NR3C1|NR3C2	866	SERPINA6	serpin family A member 6	StructureLikely	0.8438	0.9459	0.966	0.8017	0.5	0.867	0.9996	5	1	1	1	0	1	0	0	0	0.0048	N	0	TRUE	TRUE
BRD-A90131694	alclometasone	glucocorticoid receptor agonist|immunosuppressant, NR3C1|SERPINA6	866	SERPINA6	serpin family A member 6	Known	0.826	0.9473	0.9595	0.9908	0.5	0.5	0.9996	8	1	1	0	0	1	1	0	1	0.0068	Y	1	TRUE	TRUE
BRD-A92177080	betamethasone	corticosteroid agonist|glucocorticoid receptor agonist, NR3C1	866	SERPINA6	serpin family A member 6	StructureLikely	0.8783	0.941	0.967	0.8332	0.5	0.5	0.9996	5	1	1	0	0	1	0	0	0	0.0022	N	0	TRUE	TRUE
BRD-A99833829	bethanechol	acetylcholine receptor agonist, CHRM2|CHRM1|CHRM3|CHRM4	1131	CHRM3	cholinergic receptor muscarinic 3	Known	0.707	0.9572	0.9624	0.6571	0.5	0.5	0.9996	8	0	1	0	0	0	0	0	1	0.0409	Y	1	FALSE	TRUE
BRD-K06980535	promazine	dopamine receptor|dopamine receptor antagonist, CHRM5|DRD2|ADRA1A|ADRA1B|ADRA1D|CHRM1|CHRM2|CHRM3|CHRM4|DRD1|DRD3|DRD4|HRH1|HTR2A|HTR2C	1131	CHRM3	cholinergic receptor muscarinic 3	Known	0.6923	0.9572	0.9662	0.8939	0.5	0.5	0.9996	8	0	1	0	0	1	0	0	1	0.049	Y	1	FALSE	TRUE
BRD-K06980535	promazine	dopamine receptor|dopamine receptor antagonist, CHRM5|DRD2|ADRA1A|ADRA1B|ADRA1D|CHRM1|CHRM2|CHRM3|CHRM4|DRD1|DRD3|DRD4|HRH1|HTR2A|HTR2C	3269	HRH1	histamine receptor H1	Known	0.7424	0.9572	0.9662	0.8939	0.5	0.5	0.9996	8	0	1	0	0	1	0	1	1	0.0257	Y	1	FALSE	TRUE
BRD-K07612980	sparfloxacin	topoisomerase inhibitor|DNA gyrase inhibitor, TOP2A	7153	TOP2A	DNA topoisomerase II alpha	Known	0.8352	0.9467	0.9562	0.629	0.5	0.5	0.9996	8	1	1	0	0	0	0	0	1	0.0057	Y	1	TRUE	TRUE
BRD-K10995081	perphenazine	dopamine receptor|dopamine receptor antagonist, DRD2|CALM1|DRD1|HRH1|HTR2A|HTR2C|HTR6|HTR7	3269	HRH1	histamine receptor H1	Known	0.9003	0.94	0.9633	0.8298	0.5	0.5	0.9996	8	1	1	0	0	1	0	1	1	0.0012	Y	1	TRUE	TRUE
BRD-K13664374	dichloroacetic-acid	pyruvate dehydrogenase kinase inhibitor|pyruvate dehydrogenase stimulant, PDK1	5743	PTGS2	prostaglandin-endoperoxide synthase 2	pQSAR	0.8137	0.9491	0.9491	0.3497	0.5	0.5	0.9996	2	1	1	0	0	0	0	0	0	0.0085	N	0	TRUE	FALSE
BRD-K18895904	olanzapine	dopamine receptor antagonist|serotonin receptor antagonist, DRD2|HTR2A|HTR2C|DRD1|DRD3|DRD4|HRH1|HTR1A|HTR1B|HTR1D|HTR1E|HTR6|HTR7|ADRA1A|ADRA1B|ADRA2A|ADRA2B|ADRA2C|ADRB1|ADRB2|ADRB3|CHRM1|CHRM2|CHRM3|CHRM4|CHRM5|CYP2C8|DRD5|GABRA1|GABRA2|GABRA3|GABRA4|GABRA5|GABRA6|GABRB1|GABRB2|GABRB3|GABRD|GABRE|GABRG1|GABRG2|GABRG3|GABRP|GABRQ|HRH2|HRH4|HTR1F|HTR2B|HTR3A|HTR5A	3269	HRH1	histamine receptor H1	Known	0.8561	0.9458	0.9557	0.5685	0.5	0.5	0.9996	8	1	1	0	0	0	0	1	1	0.0037	Y	1	TRUE	TRUE
BRD-K31627533	rimexolone	glucocorticoid receptor agonist|immunosuppressant|mineralocorticoid receptor agonist, NR3C1|SERPINA6	866	SERPINA6	serpin family A member 6	Known	0.9168	0.9347	0.9646	0.9908	0.5	0.5	0.9996	8	1	1	0	0	1	1	0	1	0.0007	Y	1	TRUE	TRUE
BRD-K33312228	halometasone	cytochrome P450 inhibitor|glucocorticoid receptor agonist|immunosuppressant, NR3C1	5618	PRLR	prolactin receptor	pQSAR	0.9168	0.9379	0.9379	0.4165	0.5	0.5	0.9996	2	1	1	0	0	0	0	0	0	0.0007	N	0	TRUE	FALSE
BRD-K35240538	methylprednisolone	glucocorticoid receptor agonist, NR3C1	866	SERPINA6	serpin family A member 6	StructureSure	0.8669	0.9432	0.9768	0.9908	0.5	0.8919	0.9996	6	1	1	1	0	1	1	0	0	0.0029	N	0	TRUE	TRUE
BRD-K38436528	imipramine	norepinephrine reputake inhibitor|serotonin reuptake inhibitor|Sodium Channel Blockers, SLC6A2|SLC6A4|CHRM2|ADRA1A|ADRA1B|ADRA1D|CHRM1|CHRM3|CHRM4|CHRM5|CYP2C19|DRD1|DRD2|DRD5|HRH1|HTR1A|HTR2A|HTR2C|HTR6|HTR7|KCND2|KCND3|KCNH1|KCNH2|SLC6A3	1131	CHRM3	cholinergic receptor muscarinic 3	Known	0.8014	0.9512	0.9662	0.7833	0.5	0.5	0.9996	8	1	1	0	0	0	0	1	1	0.0105	Y	1	TRUE	TRUE
BRD-K47036706	fluocinonide	corticosteroid agonist|corticosteroid hormone receptor agonist, NR3C1|SERPINA6|SMO	1577	CYP3A5	cytochrome P450 family 3 subfamily A member 5	StructureLikely	0.8164	0.9489	0.9631	0.8017	0.5	0.5	0.9996	5	1	1	0	0	1	0	0	0	0.0081	N	0	TRUE	TRUE
BRD-K47278471	diphenhydramine	histamine receptor antagonist, HRH1	3269	HRH1	histamine receptor H1	Known	0.8669	0.9453	0.9683	0.8603	0.5	0.5	0.9996	8	1	1	0	0	1	0	1	1	0.0029	Y	1	TRUE	TRUE
BRD-K52080565	rilmenidine	adrenergic receptor agonist|imidazoline receptor agonist, NISCH	8644	AKR1C3	aldo-keto reductase family 1 member C3	pQSAR	0.8731	0.9423	0.9423	0.4824	0.5	0.5	0.9996	2	1	1	0	0	0	0	0	0	0.0025	N	0	TRUE	FALSE
BRD-K53790871	triamcinolone	antiinflammatory agent|corticosteroid agonist|corticosteroid binding globulin binder|corticosteroid hormone receptor agonist|cytochrome P450 inhibitor|glucocorticoid receptor agonist|immunosuppressant|immunosuppressive agent, NR3C1|CYP3A5|CYP3A7|SERPINA6	2908	NR3C1	nuclear receptor subfamily 3 group C member 1	Known	0.8599	0.9439	0.9691	0.9908	0.5	0.5	0.9996	8	1	1	0	0	1	1	1	1	0.0034	Y	1	TRUE	TRUE
BRD-K54759182	dosulepin	adrenergic transmitter uptake inhibitor|norepinephrine reuptake inhibitor|serotonin reuptake inhibitor|serotonin uptake inhibitor|tricyclic antidepressant, SLC6A2|SLC6A4|CHRM1|CHRM2|CHRM3|CHRM4|CHRM5|CYP2C19|HRH1	1128	CHRM1	cholinergic receptor muscarinic 1	Known	0.7545	0.9536	0.9682	0.8273	0.5	0.5	0.9996	8	0	1	0	0	1	0	0	1	0.0217	Y	1	FALSE	TRUE
BRD-K60640630	mometasone	glucocorticoid receptor agonist|immunosuppressant, NR3C1	2908	NR3C1	nuclear receptor subfamily 3 group C member 1	Known	0.9259	0.9312	0.9584	0.9908	0.5	0.5	0.9996	8	1	1	0	0	1	1	1	1	0.0005	Y	1	TRUE	TRUE
BRD-K69600043	thiethylperazine	dopamine receptor antagonist, DRD1|DRD2|DRD4	3269	HRH1	histamine receptor H1	pIC50	0.8783	0.9451	0.9641	0.786	0.5	0.5	0.9996	7	1	1	0	0	0	0	1	0	0.0022	N	0	TRUE	TRUE
BRD-K71451869	halcinonide	glucocorticoid receptor agonist, NR3C1	2908	NR3C1	nuclear receptor subfamily 3 group C member 1	Known	0.8491	0.9488	0.962	0.9908	0.5	0.5	0.9996	8	1	1	0	0	1	1	0	1	0.0043	Y	1	TRUE	TRUE
BRD-K76747609	beclometasone	glucocorticoid receptor agonist|corticosteroid hormone receptor agonist|immunosuppressant, NR3C1|CYP3A5|GPR97|SERPINA6	2908	NR3C1	nuclear receptor subfamily 3 group C member 1	Known	0.8164	0.9487	0.9762	0.9908	0.5	0.5	0.9996	8	1	1	0	0	1	1	1	1	0.0081	Y	1	TRUE	TRUE
BRD-K82481048	prednisolone	glucocorticoid receptor agonist, NR3C1|NR3C2|SERPINA6	866	SERPINA6	serpin family A member 6	Known	0.8549	0.9439	0.9684	0.8534	0.5	0.7677	0.9996	8	1	1	0	0	1	0	0	1	0.0038	Y	1	TRUE	TRUE
BRD-K83988098	alvespimycin	HSP inhibitor|HSP antagonist, HSP90AA1	5243	ABCB1	ATP binding cassette subfamily B member 1	pQSAR	0.9259	0.9333	0.9333	0.3265	0.4393	0.6096	0.9996	2	1	1	0	0	0	0	0	0	0.0005	N	0	TRUE	FALSE
BRD-K88378636	withaferin-a	acetylcholinesterase inhibitor|butyrylcholinesterase inhibitors|IKK inhibitor|NFkB pathway inhibitor|PKC inhibitor, ACHE|BCHE|IKBKB	5243	ABCB1	ATP binding cassette subfamily B member 1	pQSAR	0.8599	0.944	0.944	0.1733	0.5	0.5105	0.9996	2	1	1	0	0	0	0	0	0	0.0034	N	0	TRUE	FALSE
BRD-K99107520	felbamate	carbonic anhydrase inhibitor|GABA receptor modulator|glutamate receptor blocker, GRIN2A|GRIN2B|GRIN3A	1577	CYP3A5	cytochrome P450 family 3 subfamily A member 5	pQSAR	0.9259	0.9303	0.9303	0.564	0.5	0.5	0.9996	2	1	1	0	0	0	0	0	0	0.0005	N	0	TRUE	FALSE
BRD-A04553218	chlorphenamine	histamine receptor antagonist, HRH1|SLC6A2|SLC6A3|SLC6A4	3269	HRH1	histamine receptor H1	Known	0.884	0.9379	0.9756	0.9908	0.5	0.5	0.9995	8	1	1	0	0	1	1	1	1	0.0019	Y	1	TRUE	TRUE
BRD-A07000685	hydrocortisone	corticosteroid agonist|glucocorticoid receptor agonist|immunosuppressant|interleukin receptor antagonist, ANXA1|NOS2|NR3C1|NR3C2	2908	NR3C1	nuclear receptor subfamily 3 group C member 1	Known	0.9168	0.928	0.9687	0.9908	0.5	0.5	0.9995	8	1	1	0	0	1	1	0	1	0.0007	Y	1	TRUE	TRUE
BRD-A07893380	vigabatrin	GABA aminotransferase inhibitor, ABAT|GABBR1|SLC32A1	383	ARG1	arginase 1	pQSAR	0.8317	0.9437	0.9437	0.1692	0.5	0.5	0.9995	2	1	1	0	0	0	0	0	0	0.0061	N	0	TRUE	FALSE
BRD-A13122391	triptolide	RNA polymerase inhibitor, CYP2C19|RELA	3091	HIF1A	hypoxia inducible factor 1 subunit alpha	pQSAR	0.9259	0.9256	0.9256	0.1233	0.7304	0.4626	0.9995	2	1	1	0	0	0	0	0	0	0.0005	N	0	TRUE	FALSE
BRD-A15297126	fluocinonide	corticosteroid agonist|corticosteroid hormone receptor agonist, NR3C1|SERPINA6|SMO	1577	CYP3A5	cytochrome P450 family 3 subfamily A member 5	StructureLikely	0.7578	0.9489	0.9631	0.8017	0.5	0.5	0.9995	5	0	1	0	0	1	0	0	0	0.0207	N	0	FALSE	TRUE
BRD-A23290232	westcort	corticosteroid	2908	NR3C1	nuclear receptor subfamily 3 group C member 1	StructureSure	0.8144	0.9449	0.9607	0.9908	0.5	0.5	0.9995	6	1	1	0	0	1	1	0	0	0.0084	N	0	TRUE	TRUE
BRD-A23290232	westcort	corticosteroid	301	ANXA1	annexin A1	StructureSure	0.9259	0.9251	0.9607	0.9908	0.5	0.5	0.9995	6	1	1	0	0	1	1	0	0	0.0005	N	0	TRUE	TRUE
BRD-A27887842	prednisolone	glucocorticoid receptor agonist, NR3C1|NR3C2|SERPINA6	2099	ESR1	estrogen receptor 1	pQSAR	0.8317	0.9449	0.9449	0.4514	0.5	0.5	0.9995	2	1	1	0	0	0	0	0	0	0.0061	N	0	TRUE	FALSE
BRD-A34806832	proscillaridin	ATPase inhibitor, ATP1A1	5243	ABCB1	ATP binding cassette subfamily B member 1	NCI60	0.8715	0.9388	0.9388	0.4282	0.4944	0.8136	0.9995	3	1	1	1	0	0	0	0	0	0.0026	N	0	TRUE	TRUE
BRD-A37780065	triamcinolone	antiinflammatory agent|corticosteroid agonist|corticosteroid binding globulin binder|corticosteroid hormone receptor agonist|cytochrome P450 inhibitor|glucocorticoid receptor agonist|immunosuppressant|immunosuppressive agent, NR3C1|CYP3A5|CYP3A7|SERPINA6	301	ANXA1	annexin A1	StructureSure	0.8199	0.9458	0.9737	0.9683	0.5	0.7953	0.9995	6	1	1	0	0	1	1	0	0	0.0076	N	0	TRUE	TRUE
BRD-A59943784	fluticasone	glucocorticoid receptor agonist, NR3C1|CYP3A5|CYP3A7|NR3C2|PGR|PLA2G4A	2908	NR3C1	nuclear receptor subfamily 3 group C member 1	Known	0.7064	0.9548	0.9689	0.8207	0.5	0.5	0.9995	8	0	1	0	0	1	0	0	1	0.0412	Y	1	FALSE	TRUE
BRD-A59985574	topotecan	topoisomerase inhibitor, TOP1|TOP1MT	7153	TOP2A	DNA topoisomerase II alpha	pQSAR	0.9062	0.9297	0.9297	0.15	0.5	0.5	0.9995	2	1	1	0	0	0	0	0	0	0.001	N	0	TRUE	FALSE
BRD-A73635141	hydrocortisone	corticosteroid agonist|glucocorticoid receptor agonist|immunosuppressant|interleukin receptor antagonist, ANXA1|NOS2|NR3C1|NR3C2	1577	CYP3A5	cytochrome P450 family 3 subfamily A member 5	NCI60	0.8192	0.9459	0.9459	0.6782	0.5	0.8862	0.9995	3	1	1	1	0	0	0	0	0	0.0077	N	0	TRUE	TRUE
BRD-A73635141	hydrocortisone	corticosteroid agonist|glucocorticoid receptor agonist|immunosuppressant|interleukin receptor antagonist, ANXA1|NOS2|NR3C1|NR3C2	2908	NR3C1	nuclear receptor subfamily 3 group C member 1	Known	0.8292	0.9459	0.9772	0.9908	0.5	0.8919	0.9995	8	1	1	1	0	1	1	0	1	0.0064	Y	1	TRUE	TRUE
BRD-A75172220	hydrocortisone	corticosteroid agonist|glucocorticoid receptor agonist|immunosuppressant|interleukin receptor antagonist, ANXA1|NOS2|NR3C1|NR3C2	866	SERPINA6	serpin family A member 6	StructureLikely	0.7987	0.9459	0.966	0.8017	0.5	0.867	0.9995	5	0	1	1	0	1	0	0	0	0.011	N	0	FALSE	TRUE
BRD-A99833829	bethanechol	acetylcholine receptor agonist, CHRM2|CHRM1|CHRM3|CHRM4	1128	CHRM1	cholinergic receptor muscarinic 1	Known	0.6263	0.9572	0.9624	0.6571	0.5	0.5	0.9995	8	0	1	0	0	0	0	0	1	0.1026	Y	1	FALSE	TRUE
BRD-K09295900	BRD-K09295900		2908	NR3C1	nuclear receptor subfamily 3 group C member 1	StructureSure	0.9259	0.9296	0.9687	0.9908	0.5	0.5	0.9995	6	1	1	0	0	1	1	0	0	0.0005	N	0	TRUE	TRUE
BRD-K10995081	perphenazine	dopamine receptor|dopamine receptor antagonist, DRD2|CALM1|DRD1|HRH1|HTR2A|HTR2C|HTR6|HTR7	1812	DRD1	dopamine receptor D1	Known	0.8765	0.94	0.9706	0.8939	0.5	0.5	0.9995	8	1	1	0	0	1	0	0	1	0.0023	Y	1	TRUE	TRUE
BRD-K11469942	fluticasone	glucocorticoid receptor agonist, NR3C1|CYP3A5|CYP3A7|NR3C2|PGR|PLA2G4A	2908	NR3C1	nuclear receptor subfamily 3 group C member 1	Known	0.8684	0.9389	0.9755	0.9908	0.5	0.5	0.9995	8	1	1	0	0	1	1	1	1	0.0028	Y	1	TRUE	TRUE
BRD-K14791739	fluticasone	glucocorticoid receptor agonist, NR3C1|CYP3A5|CYP3A7|NR3C2|PGR|PLA2G4A	2908	NR3C1	nuclear receptor subfamily 3 group C member 1	Known	0.8613	0.9389	0.9755	0.9908	0.5	0.5	0.9995	8	1	1	0	0	1	1	1	1	0.0033	Y	1	TRUE	TRUE
BRD-K17497770	butein	angiotensin converting enzyme inhibitor|epidermal growth factor receptor (EGFR) inhibitor|interleukin synthesis inhibitor|NFkB pathway inhibitor|SIRT activator|Src tyrosine kinase inhibitor|steroid 5alpha-reductase inhibitor|tumor necrosis factor production inhibitor, ACE|CXCL8|IL6|SIRT1|SRD5A1|SRD5A2|TNF	1956	EGFR	epidermal growth factor receptor	NCI60	0.8525	0.9427	0.9448	0.5765	0.5	0.8303	0.9995	3	1	1	1	0	0	0	0	0	0.004	N	0	TRUE	TRUE
BRD-K18757346	U-46619	thromboxane receptor agonist, PTGDR|PTGDR2|PTGER1|PTGER2|PTGER3|PTGER4|PTGFR|PTGIR|TBXA2R	5734	PTGER4	prostaglandin E receptor 4	Known	0.8561	0.9389	0.963	0.7724	0.5	0.5	0.9995	8	1	1	0	0	0	0	0	1	0.0037	Y	1	TRUE	TRUE
BRD-K28542495	benzydamine	membrane integrity inhibitor|prostanoid receptor inhibitor, PRSS1|PRSS2	3269	HRH1	histamine receptor H1	pQSAR	0.8654	0.9383	0.9383	0.564	0.5	0.5	0.9995	2	1	1	0	0	0	0	0	0	0.003	N	0	TRUE	FALSE
BRD-K35240538	methylprednisolone	glucocorticoid receptor agonist, NR3C1	1577	CYP3A5	cytochrome P450 family 3 subfamily A member 5	NCI60	0.7875	0.9463	0.9466	0.6782	0.5	0.8096	0.9995	3	0	1	1	0	0	0	0	0	0.0132	N	0	FALSE	TRUE
BRD-K46137903	prednicarbate	corticosteroid agonist|immunosuppressant|phospholipase activator, NR3C1|PLA2G1B	2908	NR3C1	nuclear receptor subfamily 3 group C member 1	Known	0.8343	0.9444	0.9626	0.9908	0.5	0.5	0.9995	8	1	1	0	0	1	1	1	1	0.0058	Y	1	TRUE	TRUE
BRD-K47278471	diphenhydramine	histamine receptor antagonist, HRH1	154	ADRB2	adrenoceptor beta 2	pQSAR	0.8699	0.9406	0.9406	0.4608	0.5	0.5	0.9995	2	1	1	0	0	0	0	0	0	0.0027	N	0	TRUE	FALSE
BRD-K53790871	triamcinolone	antiinflammatory agent|corticosteroid agonist|corticosteroid binding globulin binder|corticosteroid hormone receptor agonist|cytochrome P450 inhibitor|glucocorticoid receptor agonist|immunosuppressant|immunosuppressive agent, NR3C1|CYP3A5|CYP3A7|SERPINA6	866	SERPINA6	serpin family A member 6	Known	0.8185	0.9439	0.9691	0.9908	0.5	0.5	0.9995	8	1	1	0	0	1	1	0	1	0.0078	Y	1	TRUE	TRUE
BRD-K68867920	quetiapine	dopamine receptor antagonist|serotonin receptor antagonist|adrenergic receptor antagonist|histamine receptor antagonist, DRD2|HTR1A|HTR2A|DRD1|HRH1|HTR1D|HTR1E|ADRA1A|ADRA1B|ADRA1D|ADRA2A|ADRA2B|ADRA2C|CHRM1|CHRM2|CHRM3|CHRM4|CHRM5|DRD3|DRD4|DRD5|HTR1B|HTR1F|HTR2C|HTR3A|HTR6|HTR7|SLC6A2	1131	CHRM3	cholinergic receptor muscarinic 3	Known	0.884	0.9385	0.9385	0.4967	0.5	0.5	0.9995	8	1	1	0	0	0	0	0	1	0.0019	Y	1	TRUE	TRUE
BRD-K73978287	hydrocortisone	corticosteroid agonist|glucocorticoid receptor agonist|immunosuppressant|interleukin receptor antagonist, ANXA1|NOS2|NR3C1|NR3C2	2908	NR3C1	nuclear receptor subfamily 3 group C member 1	Known	0.9259	0.928	0.9687	0.9908	0.5	0.5	0.9995	8	1	1	0	0	1	1	0	1	0.0005	Y	1	TRUE	TRUE
BRD-K76747609	beclometasone	glucocorticoid receptor agonist|corticosteroid hormone receptor agonist|immunosuppressant, NR3C1|CYP3A5|GPR97|SERPINA6	866	SERPINA6	serpin family A member 6	Known	0.8976	0.9345	0.9762	0.9908	0.5	0.5	0.9995	8	1	1	0	0	1	1	0	1	0.0013	Y	1	TRUE	TRUE
BRD-K82216340	medroxyprogesterone	progesterone receptor agonist, PGR|ESR1	2099	ESR1	estrogen receptor 1	Known	0.882	0.9364	0.9422	0.6571	0.5	0.5	0.9995	8	1	1	0	0	0	0	0	1	0.002	Y	1	TRUE	TRUE
BRD-K84175871	pseudoephedrine	histamine receptor antagonist|interleukin expression inhibitor|tumor necrosis factor expression inhibitor, ADRA1A|ADRA2A|ADRB1|ADRB2|ATF1|ATF2|ATF3|ATF4|ATF5|ATF6|ATF7|CXCL8|FOS|HRH1|IL2|JDP2|JUN|NFATC1|SLC6A2|SLC6A3|SLC6A4|TNF	154	ADRB2	adrenoceptor beta 2	Known	0.884	0.9351	0.9772	0.9908	0.5	0.5	0.9995	8	1	1	0	0	1	1	0	1	0.0019	Y	1	TRUE	TRUE
BRD-K88378636	withaferin-a	acetylcholinesterase inhibitor|butyrylcholinesterase inhibitors|IKK inhibitor|NFkB pathway inhibitor|PKC inhibitor, ACHE|BCHE|IKBKB	6097	RORC	RAR related orphan receptor C	pQSAR	0.8137	0.944	0.944	0.1733	0.5	0.4746	0.9995	2	1	1	0	0	0	0	0	0	0.0085	N	0	TRUE	FALSE
BRD-K88809146	tranylcypromine	cytochrome P450 inhibitor|histone lysine demethylase inhibitor|monoamine oxidase inhibitor, MAOA|MAOB|KDM1A|CYP2A6	152	ADRA2C	adrenoceptor alpha 2C	pQSAR	0.815	0.9469	0.9469	0.1692	0.5	0.5	0.9995	2	1	1	0	0	0	0	0	0	0.0083	N	0	TRUE	FALSE
BRD-K95391106	prednicarbate	corticosteroid agonist|immunosuppressant|phospholipase activator, NR3C1|PLA2G1B	301	ANXA1	annexin A1	pQSAR	0.8343	0.9444	0.9496	0.6843	0.5	0.5	0.9995	2	1	1	0	0	0	0	0	0	0.0058	N	0	TRUE	FALSE
BRD-A01078468	hexestrol	synthetic estrogen, inhibitor of microtubule polymerization, ESR1|AKR1C1|ESR2	2099	ESR1	estrogen receptor 1	Known	0.7436	0.9492	0.9492	0.6037	0.5	0.5	0.9994	8	0	1	0	0	0	0	1	1	0.0253	Y	1	FALSE	TRUE
BRD-A34806832	proscillaridin	ATPase inhibitor, ATP1A1	6097	RORC	RAR related orphan receptor C	NCI60	0.8317	0.9388	0.9388	0.4282	0.4944	0.8136	0.9994	3	1	1	1	0	0	0	0	0	0.0061	N	0	TRUE	TRUE
BRD-A36010170	amcinonide	corticosteroid agonist|cytochrome P450 inhibitor|glucocorticoid receptor agonist|immunosuppressant, NR3C1|ANXA1	866	SERPINA6	serpin family A member 6	StructureLikely	0.7507	0.9474	0.9661	0.8465	0.5	0.5	0.9994	5	0	1	0	0	1	0	0	0	0.0229	N	0	FALSE	TRUE
BRD-A60571864	budesonide	glucocorticoid receptor agonist|glucocordicoid receptor antagonist|immunosuppressant, NR3C1|CYP3A5|CYP3A7	2908	NR3C1	nuclear receptor subfamily 3 group C member 1	Known	0.7141	0.9489	0.977	0.9908	0.5	0.5	0.9994	8	0	1	0	0	1	1	0	1	0.0374	Y	1	FALSE	TRUE
BRD-A62428732	hydroxyzine	histamine receptor antagonist, HRH1	3358	HTR2C	5-hydroxytryptamine receptor 2C	pQSAR	0.826	0.939	0.939	0.5685	0.5	0.5	0.9994	2	1	1	0	0	0	0	0	0	0.0068	N	0	TRUE	FALSE
BRD-A62525898	prednisone	glucocorticoid receptor agonist, NR3C1|HSD11B1	2908	NR3C1	nuclear receptor subfamily 3 group C member 1	Known	0.7492	0.9464	0.9652	0.9908	0.5	0.5	0.9994	8	0	1	0	0	1	1	0	1	0.0234	Y	1	FALSE	TRUE
BRD-A69951442	dexamethasone	glucocorticoid receptor agonist|corticosteroid agonist|immunosuppressant, ANXA1|CYP3A4|CYP3A5|NOS2|NR0B1|NR3C1|NR3C2	2908	NR3C1	nuclear receptor subfamily 3 group C member 1	Known	0.8669	0.9355	0.9769	0.9908	0.5	0.5	0.9994	8	1	1	0	0	1	1	0	1	0.0029	Y	1	TRUE	TRUE
BRD-K02265150	amoxapine	adrenergic transmitter uptake inhibitor|dopamine receptor|norepinephrine reputake inhibitor|serotonin receptor antagonist|serotonin reuptake inhibitor|serotonin uptake inhibitor|tricyclic antidepressant, SLC6A2|SLC6A4|HTR2A|HTR6|ADRA1A|ADRA1B|ADRA1D|ADRA2A|ADRA2B|ADRA2C|CHRM1|CHRM2|CHRM3|CHRM4|CHRM5|DRD1|DRD2|DRD3|DRD4|GABRA1|GABRA2|GABRA3|GABRA4|GABRA5|GABRA6|GABRB1|GABRB2|GABRB3|GABRD|GABRE|GAB…	1131	CHRM3	cholinergic receptor muscarinic 3	Known	0.8951	0.9279	0.9584	0.9092	0.5	0.5	0.9994	8	1	1	0	0	1	0	0	1	0.0014	Y	1	TRUE	TRUE
BRD-K08115555	tyrphostin-AG-1288	catechol O methyltransferase inhibitor|tumor necrosis factor inhibitor, COMT	1956	EGFR	epidermal growth factor receptor	pQSAR	0.8699	0.9363	0.9549	0.799	0.5	0.5	0.9994	2	1	1	0	0	0	0	0	0	0.0027	N	0	TRUE	FALSE
BRD-K09471561	levofloxacin	topoisomerase inhibitor|DNA gyrase inhibitor, TOP2A	7153	TOP2A	DNA topoisomerase II alpha	Known	0.7465	0.9467	0.9752	0.9908	0.5	0.8919	0.9994	8	0	1	1	0	1	1	0	1	0.0243	Y	1	FALSE	TRUE
BRD-K11590034	morin	antioxidant, ADORA2A|CYP1A2|ESR2|FASN|MCL1|SLC22A12	598	BCL2L1	BCL2 like 1	pQSAR	0.8976	0.9296	0.9296	0.3265	0.5	0.5	0.9994	2	1	1	0	0	0	0	0	0	0.0013	N	0	TRUE	FALSE
BRD-K17041687	diflorasone	corticosteroid agonist|cytochrome P450 inhibitor|glucocorticoid receptor agonist|immunosuppressant, NR3C1|PLA2G1B	2908	NR3C1	nuclear receptor subfamily 3 group C member 1	Known	0.7535	0.9477	0.9671	0.9908	0.5	0.5	0.9994	8	0	1	0	0	1	1	0	1	0.022	Y	1	FALSE	TRUE
BRD-K18674849	flunisolide	cytochrome P450 inhibitor|corticosteroid agonist|corticosteroid hormone receptor agonist|glucocorticoid receptor agonist|immunosuppressant, NR3C1	2908	NR3C1	nuclear receptor subfamily 3 group C member 1	Known	0.8086	0.9422	0.9766	0.9908	0.5	0.5	0.9994	8	1	1	0	0	1	1	0	1	0.0093	Y	1	TRUE	TRUE
BRD-K19352500	prochlorperazine	dopamine receptor antagonist|dopamine receptor, DRD2|DRD1|DRD3|DRD4	1812	DRD1	dopamine receptor D1	Known	0.7875	0.9432	0.9706	0.9031	0.5	0.5	0.9994	8	0	1	0	0	1	0	0	1	0.0132	Y	1	FALSE	TRUE
BRD-K19352500	prochlorperazine	dopamine receptor antagonist|dopamine receptor, DRD2|DRD1|DRD3|DRD4	3269	HRH1	histamine receptor H1	pIC50	0.7919	0.9432	0.9706	0.9031	0.5	0.5	0.9994	7	0	1	0	0	1	0	1	0	0.0123	N	0	FALSE	TRUE
BRD-K35240538	methylprednisolone	glucocorticoid receptor agonist, NR3C1	301	ANXA1	annexin A1	NCI60	0.8171	0.9404	0.9583	0.7177	0.5	0.8096	0.9994	3	1	1	1	0	0	0	0	0	0.008	N	0	TRUE	TRUE
BRD-K36616567	doxepin	histamine receptor antagonist|adrenergic transmitter uptake inhibitor|histamine receptor inhibitor|norepinephrine reputake inhibitor|serotonin reuptake inhibitor|tricyclic antidepressant, HRH1|HRH2|SLC6A2|SLC6A4|ADRA1A|ADRA1B|ADRA1D|ADRA2A|ADRA2B|ADRA2C|CHRM1|CHRM2|CHRM3|CHRM4|CHRM5|CYP2C19|DRD2|HRH4|HTR1A|HTR2A|HTR2B|HTR2C|HTR6|KCNH2|SLC6A3	1131	CHRM3	cholinergic receptor muscarinic 3	Known	0.6817	0.9516	0.9756	0.9908	0.5	0.5	0.9994	8	0	1	0	0	1	1	1	1	0.0556	Y	1	FALSE	TRUE
BRD-K38003476	clocortolone	glucocorticoid receptor agonist, NR3C1|PLA2G1B	301	ANXA1	annexin A1	pQSAR	0.8086	0.9423	0.9423	0.4895	0.5	0.5	0.9994	2	1	1	0	0	0	0	0	0	0.0093	N	0	TRUE	FALSE
BRD-K39915878	loxapine	dopamine receptor antagonist|serotonin receptor antagonist|dopamine receptor ligand, DRD2|DRD3|DRD4|DRD1|HRH1|HTR2A|HTR2C|HTR6|ADRA1A|ADRA1B|ADRA2A|ADRA2B|ADRA2C|ADRB1|CHRM1|CHRM2|CHRM3|CHRM4|CHRM5|DRD5|HRH2|HRH4|HTR1A|HTR1B|HTR1D|HTR1E|HTR3A|HTR5A|HTR7|SLC6A2|SLC6A3|SLC6A4	1131	CHRM3	cholinergic receptor muscarinic 3	Known	0.7747	0.9458	0.9611	0.9092	0.5	0.5	0.9994	8	0	1	0	0	1	0	0	1	0.0161	Y	1	FALSE	TRUE
BRD-K43149758	myricetin	androgen receptor ligand|cytochrome P450 inhibitor, PIK3CG|AR|CYP3A4	231	AKR1B1	aldo-keto reductase family 1 member B	StructureLikely	0.7375	0.9502	0.9635	0.9092	0.5	0.5	0.9994	5	0	1	0	0	1	0	0	0	0.0275	N	0	FALSE	TRUE
BRD-K54759182	dosulepin	adrenergic transmitter uptake inhibitor|norepinephrine reuptake inhibitor|serotonin reuptake inhibitor|serotonin uptake inhibitor|tricyclic antidepressant, SLC6A2|SLC6A4|CHRM1|CHRM2|CHRM3|CHRM4|CHRM5|CYP2C19|HRH1	154	ADRB2	adrenoceptor beta 2	StructureLikely	0.8684	0.9359	0.9663	0.8273	0.5	0.5	0.9994	5	1	1	0	0	1	0	0	0	0.0028	N	0	TRUE	TRUE
BRD-K67102207	phenylbutyrate	HDAC inhibitor|cell cycle inhibitor|pharmacological chaperone|pyruvate dehydrogenase kinase inhibitor, CYP3A5|HDAC1	1786	DNMT1	DNA methyltransferase 1	pQSAR	0.9259	0.9221	0.9221	0.1881	0.5	0.5484	0.9994	2	1	1	0	0	0	0	0	0	0.0005	N	0	TRUE	FALSE
BRD-K70792160	10-DEBC	AKT inhibitor|Pim kinase inhibitor, PIM1	3269	HRH1	histamine receptor H1	pQSAR	0.8927	0.9318	0.9318	0.6447	0.5	0.5	0.9994	2	1	1	0	0	0	0	0	0	0.0015	N	0	TRUE	FALSE
BRD-K73978287	hydrocortisone	corticosteroid agonist|glucocorticoid receptor agonist|immunosuppressant|interleukin receptor antagonist, ANXA1|NOS2|NR3C1|NR3C2	866	SERPINA6	serpin family A member 6	StructureLikely	0.9062	0.928	0.9687	0.8499	0.5	0.5	0.9994	5	1	1	0	0	1	0	0	0	0.001	N	0	TRUE	TRUE
BRD-K75037734	carbachol	cholinergic, CHRM1|CHRM2|CHRNA2|CHRM3|CHRM4|CHRM5	3156	HMGCR	3-hydroxy-3-methylglutaryl-CoA reductase	pQSAR	0.8783	0.9318	0.9318	0.1611	0.5	0.5	0.9994	2	1	1	0	0	0	0	0	0	0.0022	N	0	TRUE	FALSE
BRD-K76747609	beclometasone	glucocorticoid receptor agonist|corticosteroid hormone receptor agonist|immunosuppressant, NR3C1|CYP3A5|GPR97|SERPINA6	1577	CYP3A5	cytochrome P450 family 3 subfamily A member 5	Known	0.7341	0.9487	0.9762	0.9908	0.5	0.5	0.9994	8	0	1	0	0	1	1	0	1	0.0288	Y	1	FALSE	TRUE
BRD-K80110068	cortisone	glucocorticoid receptor agonist, NR3C1	2099	ESR1	estrogen receptor 1	pQSAR	0.8067	0.9412	0.952	0.6247	0.5	0.5	0.9994	2	1	1	0	0	0	0	0	0	0.0096	N	0	TRUE	FALSE
BRD-K81925854	clocortolone	glucocorticoid receptor agonist, NR3C1|PLA2G1B	2908	NR3C1	nuclear receptor subfamily 3 group C member 1	Known	0.6462	0.9548	0.9555	0.9908	0.5	0.5	0.9994	8	0	1	0	0	1	1	0	1	0.0831	Y	1	FALSE	TRUE
BRD-K82216340	medroxyprogesterone	progesterone receptor agonist, PGR|ESR1	2908	NR3C1	nuclear receptor subfamily 3 group C member 1	pIC50	0.8599	0.9364	0.9495	0.6121	0.5	0.5	0.9994	7	1	1	0	0	0	0	1	0	0.0034	N	0	TRUE	TRUE
BRD-K82381502	acetylcholine	neurotransmitter of the peripheral and central nervous systems, ACHE|CHRM1|CHRM2|CHRM3|CHRM4|CHRM5|CHRNA2	1128	CHRM1	cholinergic receptor muscarinic 1	Known	0.5849	0.9572	0.9681	0.7347	0.5	0.5	0.9994	8	0	1	0	0	0	0	1	1	0.1546	Y	1	FALSE	TRUE
BRD-K82381502	acetylcholine	neurotransmitter of the peripheral and central nervous systems, ACHE|CHRM1|CHRM2|CHRM3|CHRM4|CHRM5|CHRNA2	1131	CHRM3	cholinergic receptor muscarinic 3	Known	0.6102	0.9572	0.9681	0.7347	0.5	0.5	0.9994	8	0	1	0	0	0	0	0	1	0.1209	Y	1	FALSE	TRUE
BRD-K84709232	caffeic-acid	lipoxygenase inhibitor|HIV integrase inhibitor|NFkB pathway inhibitor|nitric oxide production inhibitor|PPAR receptor modulator|tumor necrosis factor production inhibitor, ALOX5|MIF|RELA|TNF	1956	EGFR	epidermal growth factor receptor	pQSAR	0.946	0.9157	0.9222	0.629	0.5	0.5	0.9994	2	1	1	0	0	0	0	0	0	0.0002	N	0	TRUE	FALSE
BRD-K92310201	mometasone	glucocorticoid receptor agonist|immunosuppressant, NR3C1	2908	NR3C1	nuclear receptor subfamily 3 group C member 1	Known	0.886	0.9312	0.9584	0.9908	0.5	0.5	0.9994	8	1	1	0	0	1	1	1	1	0.0018	Y	1	TRUE	TRUE
BRD-K96282009	guaiacol	reducing co-substrate for cyclooxygenase reactions, CA2	3303	HSPA1A	heat shock protein family A (Hsp70) member 1A	pQSAR	0.9378	0.9204	0.9204	0.1379	0.5	0.5	0.9994	2	1	1	0	0	0	0	0	0	0.0003	N	0	TRUE	FALSE
BRD-K97309399	thiothixene	dopamine receptor|dopamine receptor antagonist, HTR2A|DRD1|DRD2|HRH1	3269	HRH1	histamine receptor H1	Known	0.848	0.938	0.9388	0.6983	0.5	0.7974	0.9994	8	1	1	0	0	0	0	0	1	0.0044	Y	1	TRUE	TRUE
BRD-K99545815	PF-562271	focal adhesion kinase inhibitor|angiogenesis inhibitor|apoptosis stimulant, PTK2|PTK2B	1017	CDK2	cyclin dependent kinase 2	pIC50	0.9259	0.9245	0.9245	0.3613	0.5	0.5	0.9994	7	1	1	0	0	0	0	1	0	0.0005	N	0	TRUE	TRUE
BRD-A01643550	prednisolone	glucocorticoid receptor agonist, NR3C1|NR3C2|SERPINA6	866	SERPINA6	serpin family A member 6	Known	0.826	0.9384	0.969	0.9238	0.5	0.5	0.9993	8	1	1	0	0	1	0	0	1	0.0068	Y	1	TRUE	TRUE
BRD-A13122391	triptolide	RNA polymerase inhibitor, CYP2C19|RELA	983	CDK1	cyclin dependent kinase 1	pQSAR	0.9378	0.9143	0.9143	0.1233	0.691	0.6466	0.9993	2	1	1	0	0	0	0	0	0	0.0003	N	0	TRUE	FALSE
BRD-A19195498	trimipramine	adrenergic transmitter uptake inhibitor|dopamine receptor|norepinephrine transporter inhibitor|serotonin transporter (SERT) inhibitor|serotonin uptake inhibitor|tricyclic antidepressant|tricyclic antidepressant (TCA), SLC6A2|SLC6A4|SLC6A3|ADRA1A|ADRA1B|ADRA2A|ADRA2B|ADRB1|ADRB2|ADRB3|CHRM1|CHRM2|CHRM3|CHRM4|CHRM5|DRD1|DRD2|DRD5|HRH1|HTR1A|HTR1D|HTR2A|HTR2C|HTR3A	154	ADRB2	adrenoceptor beta 2	Known	0.7666	0.9421	0.9488	0.6163	0.5	0.5	0.9993	8	0	1	0	0	0	0	0	1	0.0182	Y	1	FALSE	TRUE
BRD-A19195498	trimipramine	adrenergic transmitter uptake inhibitor|dopamine receptor|norepinephrine transporter inhibitor|serotonin transporter (SERT) inhibitor|serotonin uptake inhibitor|tricyclic antidepressant|tricyclic antidepressant (TCA), SLC6A2|SLC6A4|SLC6A3|ADRA1A|ADRA1B|ADRA2A|ADRA2B|ADRB1|ADRB2|ADRB3|CHRM1|CHRM2|CHRM3|CHRM4|CHRM5|DRD1|DRD2|DRD5|HRH1|HTR1A|HTR1D|HTR2A|HTR2C|HTR3A	3269	HRH1	histamine receptor H1	Known	0.5867	0.9544	0.9604	0.7963	0.5	0.5	0.9993	8	0	1	0	0	0	0	1	1	0.152	Y	1	FALSE	TRUE
BRD-A19661776	mianserin	serotonin receptor antagonist|tetracyclic antidepressant, HTR2A|HTR2C|ADRA1A|ADRA1B|ADRA1D|HRH1|HTR2B|HTR6|HTR7|ADRA2A|ADRA2B|ADRA2C|DRD1|DRD2|DRD3|DRD5|HRH2|HRH4|HTR1A|HTR1F|OPRK1|SLC6A2|SLC6A3|SLC6A4	1812	DRD1	dopamine receptor D1	Known	0.677	0.949	0.9523	0.814	0.5	0.5	0.9993	8	0	1	0	0	1	0	1	1	0.0588	Y	1	FALSE	TRUE
BRD-A21490874	fluoxymesterone	androgen receptor agonist, AR|ESR1|NR3C1|PRLR	1577	CYP3A5	cytochrome P450 family 3 subfamily A member 5	pQSAR	0.8438	0.9343	0.9494	0.6247	0.5	0.5	0.9993	2	1	1	0	0	0	0	0	0	0.0048	N	0	TRUE	FALSE
BRD-A25067867	benzatropine	anticholinergic, CHRM1|HRH1|SLC6A3	3269	HRH1	histamine receptor H1	Known	0.8361	0.937	0.9747	0.9908	0.5	0.5	0.9993	8	1	1	0	0	1	1	1	1	0.0056	Y	1	TRUE	TRUE
BRD-A25143711	hydrocortisone	corticosteroid agonist|glucocorticoid receptor agonist|immunosuppressant|interleukin receptor antagonist, ANXA1|NOS2|NR3C1|NR3C2	866	SERPINA6	serpin family A member 6	pQSAR	0.83	0.9354	0.9447	0.6712	0.5	0.5	0.9993	2	1	1	0	0	0	0	0	0	0.0063	N	0	TRUE	FALSE
BRD-A27887842	prednisolone	glucocorticoid receptor agonist, NR3C1|NR3C2|SERPINA6	1577	CYP3A5	cytochrome P450 family 3 subfamily A member 5	pQSAR	0.8086	0.9377	0.9517	0.7935	0.5	0.5	0.9993	2	1	1	0	0	0	0	0	0	0.0093	N	0	TRUE	FALSE
BRD-A28746609	paclitaxel	tubulin inhibitor|microtubule stabilizing agent|microtubule stimulant|P glycoprotein inhibitor|taxane, TUBB|NR1I2|ABCB1|BCL2|CYP2C8|MAP2|MAP4|MAPT|TLR4|TUBB1	10383	TUBB4B	tubulin beta 4B class IVb	pQSAR	0.8284	0.9354	0.9354	0.1233	0.5	0.7176	0.9993	2	1	1	0	0	0	0	0	0	0.0065	N	0	TRUE	FALSE
BRD-A37780065	triamcinolone	antiinflammatory agent|corticosteroid agonist|corticosteroid binding globulin binder|corticosteroid hormone receptor agonist|cytochrome P450 inhibitor|glucocorticoid receptor agonist|immunosuppressant|immunosuppressive agent, NR3C1|CYP3A5|CYP3A7|SERPINA6	866	SERPINA6	serpin family A member 6	Known	0.9168	0.9186	0.9769	0.9908	0.5	0.8919	0.9993	8	1	1	1	0	1	1	0	1	0.0007	Y	1	TRUE	TRUE
BRD-A49225603	alimemazine	histamine receptor ligand, HRH1	3269	HRH1	histamine receptor H1	Known	0.7619	0.9425	0.9642	0.9908	0.5	0.5	0.9993	8	0	1	0	0	1	1	0	1	0.0195	Y	1	FALSE	TRUE
BRD-A62184259	cycloheximide	glycogen synthase kinase inhibitor|protein synthesis inhibitor, GSK3B|RPL3	476	ATP1A1	ATPase Na+/K+ transporting subunit alpha 1	pQSAR	0.9378	0.9146	0.9146	0.1248	0.7849	0.6458	0.9993	2	1	1	0	0	0	0	0	0	0.0003	N	0	TRUE	FALSE
BRD-A65767837	hydrocortisone	corticosteroid agonist|glucocorticoid receptor agonist|immunosuppressant|interleukin receptor antagonist, ANXA1|NOS2|NR3C1|NR3C2	2908	NR3C1	nuclear receptor subfamily 3 group C member 1	Known	0.8537	0.9316	0.9694	0.9908	0.5	0.5	0.9993	8	1	1	0	0	1	1	1	1	0.0039	Y	1	TRUE	TRUE
BRD-A75172220	hydrocortisone	corticosteroid agonist|glucocorticoid receptor agonist|immunosuppressant|interleukin receptor antagonist, ANXA1|NOS2|NR3C1|NR3C2	367	AR	androgen receptor	StructureLikely	0.9003	0.9233	0.9649	0.9031	0.5	0.6421	0.9993	5	1	1	0	0	1	0	0	0	0.0012	N	0	TRUE	TRUE
BRD-A78391468	prednisolone	glucocorticoid receptor agonist, NR3C1|NR3C2|SERPINA6	2908	NR3C1	nuclear receptor subfamily 3 group C member 1	Known	0.8783	0.9296	0.9687	0.9031	0.5	0.5	0.9993	8	1	1	0	0	1	0	0	1	0.0022	Y	1	TRUE	TRUE
BRD-A79479878	testosterone	androgen receptor (AR) agonist|androgen receptor agonist|testosterone receptor agonist, AR|CYP19A1|CYP2C19|CYP2C8|CYP3A5	2099	ESR1	estrogen receptor 1	StructureLikely	0.8699	0.9293	0.9651	0.8398	0.5	0.5	0.9993	5	1	1	0	0	1	0	0	0	0.0027	N	0	TRUE	TRUE
BRD-A89434049	sarmentogenin	ATPase inhibitor, ATP1A1	476	ATP1A1	ATPase Na+/K+ transporting subunit alpha 1	Known	0.7954	0.9397	0.9686	0.8908	0.5	0.5	0.9993	8	0	1	0	0	1	0	0	1	0.0116	Y	1	FALSE	TRUE
BRD-A99833829	bethanechol	acetylcholine receptor agonist, CHRM2|CHRM1|CHRM3|CHRM4	3156	HMGCR	3-hydroxy-3-methylglutaryl-CoA reductase	pQSAR	0.8459	0.9359	0.9359	0.1531	0.5	0.5	0.9993	2	1	1	0	0	0	0	0	0	0.0046	N	0	TRUE	FALSE
BRD-A99833829	bethanechol	acetylcholine receptor agonist, CHRM2|CHRM1|CHRM3|CHRM4	7083	TK1	thymidine kinase 1	pQSAR	0.8317	0.9359	0.9359	0.1038	0.5	0.5	0.9993	2	1	1	0	0	0	0	0	0	0.0061	N	0	TRUE	FALSE
BRD-K00835182	dexamethasone	glucocorticoid receptor agonist|corticosteroid agonist|immunosuppressant, ANXA1|CYP3A4|CYP3A5|NOS2|NR0B1|NR3C1|NR3C2	866	SERPINA6	serpin family A member 6	StructureSure	0.9378	0.9135	0.9737	0.9683	0.5	0.5	0.9993	6	1	1	0	0	1	1	0	0	0.0003	N	0	TRUE	TRUE
BRD-K07325606	hispidin	beta secretase inhibitor|cyclooxygenase inhibitor|HIV integrase inhibitor|PKC inhibitor|prolyl endopeptidase inhibitor|xanthine oxidase inhibitor, PREP|PRKCB|PTGS2|XDH	5579	PRKCB	protein kinase C beta	Known	0.8104	0.939	0.939	0.3381	0.5	0.5	0.9993	8	1	1	0	0	0	0	0	1	0.009	Y	1	TRUE	TRUE
BRD-K10467831	tibolone	estrogen receptor agonist|androgen receptor agonist|progesterone receptor agonist|selective estrogen receptor modulator (SERM)|steryl sulfatase inhibitor, AR|ESR1|PGR|STS	2908	NR3C1	nuclear receptor subfamily 3 group C member 1	pQSAR	0.9168	0.9222	0.9222	0.3149	0.5	0.5	0.9993	2	1	1	0	0	0	0	0	0	0.0007	N	0	TRUE	FALSE
BRD-K25433859	maprotiline	norepinephrine reputake inhibitor|tricyclic antidepressant (TCA), SLC6A2|ADRA1A|ADRA1B|ADRA1D|ADRA2A|ADRA2B|ADRA2C|CHRM1|CHRM2|CHRM3|CHRM4|CHRM5|DRD2|HRH1|HTR2A|HTR2C|HTR7	1131	CHRM3	cholinergic receptor muscarinic 3	Known	0.838	0.9342	0.9342	0.9908	0.5	0.5	0.9993	8	1	1	0	0	1	1	0	1	0.0054	Y	1	TRUE	TRUE
BRD-K28761384	zuclopenthixol	dopamine receptor antagonist, DRD2|DRD1|ADRA1A|ADRA2A|DRD5|HRH1|HTR2A	2554	GABRA1	gamma-aminobutyric acid type A receptor subunit alpha1	pQSAR	0.9095	0.9244	0.9244	0.3265	0.5	0.5	0.9993	2	1	1	0	0	0	0	0	0	0.0009	N	0	TRUE	FALSE
BRD-K30697463	desoximetasone	glucocorticoid receptor agonist, NR3C1|PLA2G1B	301	ANXA1	annexin A1	pQSAR	0.8117	0.9399	0.9632	0.7546	0.5	0.5	0.9993	2	1	1	0	0	0	0	0	0	0.0088	N	0	TRUE	FALSE
BRD-K32906660	bis-tyrphostin	EGFR inhibitor|dynamin GTPase inhibitor, DNM1|EGFR	5970	RELA	RELA proto-oncogene, NF-kB subunit	pQSAR	0.946	0.9079	0.9079	0.4824	0.5	0.5	0.9993	2	1	1	0	0	0	0	0	0	0.0002	N	0	TRUE	FALSE
BRD-K33312228	halometasone	cytochrome P450 inhibitor|glucocorticoid receptor agonist|immunosuppressant, NR3C1	301	ANXA1	annexin A1	pQSAR	0.8626	0.9329	0.962	0.7606	0.5	0.5	0.9993	2	1	1	0	0	0	0	0	0	0.0032	N	0	TRUE	FALSE
BRD-K46137903	prednicarbate	corticosteroid agonist|immunosuppressant|phospholipase activator, NR3C1|PLA2G1B	866	SERPINA6	serpin family A member 6	pQSAR	0.8171	0.9377	0.9599	0.799	0.5	0.5	0.9993	2	1	1	0	0	0	0	0	0	0.008	N	0	TRUE	FALSE
BRD-K49865102	PD-0325901	MEK inhibitor|MAP kinase inhibitor|protein kinase inhibitor, MAP2K1|MAP2K2	5604	MAP2K1	mitogen-activated protein kinase kinase 1	Known	0.9259	0.9191	0.9258	0.9908	0.4783	0.5	0.9993	8	1	1	0	0	1	1	1	1	0.0005	Y	1	TRUE	TRUE
BRD-K54256913	MK-1775	wee1 kinase inhibitor, WEE1	5979	RET	ret proto-oncogene	pQSAR	0.913	0.9233	0.9233	0.2931	0.5	0.5	0.9993	2	1	1	0	0	0	0	0	0	0.0008	N	0	TRUE	FALSE
BRD-K57080016	selumetinib	MEK inhibitor|MAP kinase inhibitor, MAP2K1|MAP2K2	5604	MAP2K1	mitogen-activated protein kinase kinase 1	Known	0.8731	0.9318	0.9318	0.5765	0.5	0.8546	0.9993	8	1	1	1	0	0	0	1	1	0.0025	Y	1	TRUE	TRUE
BRD-K59058747	acetylcysteine	glutathione synthase stimulant|mucolytic agent|NFkB pathway inhibitor|reducing agent|unidentified pharmacological activity, ACY1|CHUK|GRIN1|GRIN2A|GRIN2B|GRIN2D|GRIN3A|GSS|IKBKB|RELA|SLC7A11	5467	PPARD	peroxisome proliferator activated receptor delta	pQSAR	0.8783	0.9287	0.9287	0.1338	0.5	0.6318	0.9993	2	1	1	0	0	0	0	0	0	0.0022	N	0	TRUE	FALSE
BRD-K70504303	prednisolone	glucocorticoid receptor agonist, NR3C1|NR3C2|SERPINA6	2908	NR3C1	nuclear receptor subfamily 3 group C member 1	Known	0.7032	0.9471	0.969	0.9908	0.5	0.5	0.9993	8	0	1	0	0	1	1	0	1	0.0429	Y	1	FALSE	TRUE
BRD-K93034159	cladribine	adenosine deaminase inhibitor|antimetabolite|DNA synthesis inhibitor|immunosuppressant|ribonucleotide reductase inhibitor, ADA|PNP|POLA1|POLE|POLE2|POLE3|POLE4|RRM1|RRM2|RRM2B	5422	POLA1	DNA polymerase alpha 1, catalytic subunit	Known	0.8428	0.9336	0.944	0.8044	0.5	0.8007	0.9993	8	1	1	1	0	1	0	0	1	0.0049	Y	1	TRUE	TRUE
BRD-K94270326	ecopipam	dopamine receptor antagonist, DRD1|DRD5|DRD2	1812	DRD1	dopamine receptor D1	Known	0.8715	0.932	0.9522	0.6983	0.5	0.5	0.9993	8	1	1	0	0	0	0	1	1	0.0026	Y	1	TRUE	TRUE
BRD-K96006502	deflazacort	corticosteroid agonist, NR3C1	2908	NR3C1	nuclear receptor subfamily 3 group C member 1	Known	0.8185	0.939	0.9522	0.8298	0.5	0.5	0.9993	8	1	1	0	0	1	0	1	1	0.0078	Y	1	TRUE	TRUE
BRD-A01078468	hexestrol	synthetic estrogen, inhibitor of microtubule polymerization, ESR1|AKR1C1|ESR2	2100	ESR2	estrogen receptor 2	Known	0.6208	0.9501	0.9501	0.6037	0.5	0.5	0.9992	8	0	1	0	0	0	0	0	1	0.1086	Y	1	FALSE	TRUE
BRD-A01078468	hexestrol	synthetic estrogen, inhibitor of microtubule polymerization, ESR1|AKR1C1|ESR2	3269	HRH1	histamine receptor H1	pQSAR	0.913	0.9159	0.9159	0.1611	0.5	0.5	0.9992	2	1	1	0	0	0	0	0	0	0.0008	N	0	TRUE	FALSE
BRD-A15297126	fluocinonide	corticosteroid agonist|corticosteroid hormone receptor agonist, NR3C1|SERPINA6|SMO	866	SERPINA6	serpin family A member 6	Known	0.6698	0.9473	0.9719	0.9908	0.5	0.5	0.9992	8	0	1	0	0	1	1	0	1	0.0639	Y	1	FALSE	TRUE
BRD-A16311756	profenamine	butyrylcholinesterase inhibitors|cholinergic receptor antagonist|glutamate receptor antagonist, CHRM1|BCHE|CHRM2|GRIN3A	1128	CHRM1	cholinergic receptor muscarinic 1	Known	0.6466	0.9497	0.968	0.8207	0.5	0.5	0.9992	8	0	1	0	0	1	0	0	1	0.0827	Y	1	FALSE	TRUE
BRD-A20126139	medrysone	corticosteroid hormone receptor agonist|glucocorticoid receptor agonist, NR3C1	866	SERPINA6	serpin family A member 6	pQSAR	0.8361	0.9334	0.9467	0.6037	0.5	0.5	0.9992	2	1	1	0	0	0	0	0	0	0.0056	N	0	TRUE	FALSE
BRD-A23290232	westcort	corticosteroid	866	SERPINA6	serpin family A member 6	pQSAR	0.8055	0.9354	0.9447	0.6712	0.5	0.5	0.9992	2	1	1	0	0	0	0	0	0	0.0098	N	0	TRUE	FALSE
BRD-A29731977	17-hydroxyprogesterone-caproate	progesterone receptor agonist, CYP1A2|CYP2B6|CYP3A5|PGR	2908	NR3C1	nuclear receptor subfamily 3 group C member 1	pIC50	0.9168	0.9166	0.9561	0.7606	0.5	0.5758	0.9992	7	1	1	0	0	0	0	1	0	0.0007	N	0	TRUE	TRUE
BRD-A49225603	alimemazine	histamine receptor ligand, HRH1	1131	CHRM3	cholinergic receptor muscarinic 3	StructureLikely	0.7462	0.9425	0.9642	0.8734	0.5	0.5	0.9992	5	0	1	0	0	1	0	0	0	0.0244	N	0	FALSE	TRUE
BRD-A59215453	lobelanidine	acetylcholine receptor antagonist|dopamine receptor modulator|opioid receptor antagonist|vesicular monoamine transporter ligand, SLC18A2|CHRNA10|CHRNA4|CHRNA9|CHRNB2|OPRM1	467	ATF3	activating transcription factor 3	pQSAR	0.9259	0.9136	0.9136	0.3933	0.5	0.5	0.9992	2	1	1	0	0	0	0	0	0	0.0005	N	0	TRUE	FALSE
BRD-A67799922	phenoxybenzamine	adrenergic receptor antagonist, ADRA2B|ADRA1A|ADRA1B|ADRA1D|ADRA2A|ADRA2C|ADRB2|CALM1	476	ATP1A1	ATPase Na+/K+ transporting subunit alpha 1	pQSAR	0.8317	0.9318	0.9318	0.5165	0.5	0.5	0.9992	2	1	1	0	0	0	0	0	0	0.0061	N	0	TRUE	FALSE
BRD-A84228258	brefeldin-a	antibiotic that disrupts Golgi function|brefeldin A inhibited guanine nucleotide exchange protein inhibitors|golgi-specific brefeldin A-resistance guanine nucleotide exchange factor inhibitor|protein synthesis inhibitor, ARF1|ARFGEF1|ARFGEF2|CYTH2|GBF1|SAR1A	3551	IKBKB	inhibitor of nuclear factor kappa B kinase subunit beta	pQSAR	0.9062	0.9206	0.9206	0.1692	0.7669	0.4831	0.9992	2	1	1	0	0	0	0	0	0	0.001	N	0	TRUE	FALSE
BRD-K01014769	isoflupredone	glucocorticoid receptor agonist, NR3C1	2099	ESR1	estrogen receptor 1	pQSAR	0.913	0.919	0.9479	0.6447	0.5	0.5	0.9992	2	1	1	0	0	0	0	0	0	0.0008	N	0	TRUE	FALSE
BRD-K06980535	promazine	dopamine receptor|dopamine receptor antagonist, CHRM5|DRD2|ADRA1A|ADRA1B|ADRA1D|CHRM1|CHRM2|CHRM3|CHRM4|DRD1|DRD3|DRD4|HRH1|HTR2A|HTR2C	1812	DRD1	dopamine receptor D1	Known	0.672	0.9476	0.9662	0.8939	0.5	0.5	0.9992	8	0	1	0	0	1	0	0	1	0.0623	Y	1	FALSE	TRUE
BRD-K08547377	irinotecan	topoisomerase inhibitor, TOP1|CYP3A5|TOP1MT	7153	TOP2A	DNA topoisomerase II alpha	pQSAR	0.9168	0.9155	0.9155	0.1264	0.5	0.7787	0.9992	2	1	1	0	0	0	0	0	0	0.0007	N	0	TRUE	FALSE
BRD-K08973992	linoleic-acid	oxidative stress inducer, FABP4|FFAR1|FFAR4|HNF4A|KCNB1|PPARG|TRPM8	2550	GABBR1	gamma-aminobutyric acid type B receptor subunit 1	pQSAR	0.8715	0.9286	0.9286	0.4608	0.5	0.5	0.9992	2	1	1	0	0	0	0	0	0	0.0026	N	0	TRUE	FALSE
BRD-K09295900	BRD-K09295900		1577	CYP3A5	cytochrome P450 family 3 subfamily A member 5	pQSAR	0.8613	0.9296	0.9407	0.7205	0.5	0.5	0.9992	2	1	1	0	0	0	0	0	0	0.0033	N	0	TRUE	FALSE
BRD-K12502280	TG-101348	JAK inhibitor|FLT3 inhibitor|RET tyrosine kinase inhibitor, JAK2|FLT3|BRD4|JAK1|JAK3|RET|TYK2	2932	GSK3B	glycogen synthase kinase 3 beta	pQSAR	0.9095	0.9194	0.9194	0.4608	0.5	0.5	0.9992	2	1	1	0	0	0	0	0	0	0.0009	N	0	TRUE	FALSE
BRD-K17743125	belinostat	HDAC inhibitor|cell cycle inhibitor, HDAC1|HDAC2|HDAC3|HDAC4|HDAC5|HDAC6|HDAC7|HDAC8|HDAC9	3065	HDAC1	histone deacetylase 1	Known	0.8654	0.9289	0.9425	0.7724	0.5	0.7576	0.9992	8	1	1	0	0	0	0	1	1	0.003	Y	1	TRUE	TRUE
BRD-K17743125	belinostat	HDAC inhibitor|cell cycle inhibitor, HDAC1|HDAC2|HDAC3|HDAC4|HDAC5|HDAC6|HDAC7|HDAC8|HDAC9	8841	HDAC3	histone deacetylase 3	Known	0.8586	0.9289	0.9289	0.5549	0.5	0.7576	0.9992	8	1	1	0	0	0	0	1	1	0.0035	Y	1	TRUE	TRUE
BRD-K18194590	mephentermine	adrenergic receptor agonist, ADRA1A|ADRA1B|ADRA1D|ADRA2A|ADRA2B|ADRA2C|ADRB1|ADRB2|ADRB3	3269	HRH1	histamine receptor H1	pQSAR	0.8207	0.9351	0.9351	0.3497	0.5	0.5	0.9992	2	1	1	0	0	0	0	0	0	0.0075	N	0	TRUE	FALSE
BRD-K18518344	digitoxigenin	ATPase inhibitor, ATP1A1	476	ATP1A1	ATPase Na+/K+ transporting subunit alpha 1	Known	0.8525	0.9289	0.9752	0.9908	0.8421	0.861	0.9992	8	1	1	1	1	1	1	0	1	0.004	Y	1	TRUE	TRUE
BRD-K28687144	fosfosal	phosphodiesterase inhibitor, PDE4A|PDE4B|PDE4C|PDE4D|PTGS1|PTGS2	5163	PDK1	pyruvate dehydrogenase kinase 1	pQSAR	0.9259	0.9139	0.9139	0.117	0.5	0.5	0.9992	2	1	1	0	0	0	0	0	0	0.0005	N	0	TRUE	FALSE
BRD-K29173907	isoflupredone	glucocorticoid receptor agonist, NR3C1	866	SERPINA6	serpin family A member 6	StructureLikely	0.8361	0.9322	0.9633	0.8017	0.5	0.5	0.9992	5	1	1	0	0	1	0	0	0	0.0056	N	0	TRUE	TRUE
BRD-K29582115	ziprasidone	dopamine receptor antagonist|serotonin receptor antagonist|norepinephrine reuptake inhibitor|serotonin receptor agonist|serotonin reuptake inhibitor, DRD2|HTR2A|HTR1A|HTR1D|HRH1|HTR1B|HTR1E|HTR2C|HTR7|ADRA1A|ADRA1B|ADRA2A|ADRA2B|ADRA2C|CHRM1|CHRM2|CHRM3|CHRM4|CHRM5|DRD1|DRD3|DRD4|DRD5|HTR3A|HTR6|SLC6A4	1131	CHRM3	cholinergic receptor muscarinic 3	Known	0.8525	0.9311	0.9311	0.4967	0.5	0.5	0.9992	8	1	1	0	0	0	0	0	1	0.004	Y	1	TRUE	TRUE
BRD-K37289225	clozapine	serotonin receptor antagonist|dopamine receptor antagonist|adrenergic receptor antagonist, DRD2|DRD4|ADRA1A|ADRA1B|CHRM1|DRD1|DRD3|HRH1|HRH4|HTR1A|HTR1B|HTR1D|HTR1E|HTR2A|HTR2C|HTR6|HTR7|ADRA1D|ADRA2A|ADRA2B|ADRA2C|CALY|CHRM2|CHRM3|CHRM4|CHRM5|CYP2C19|DRD5|HTR1F|HTR2B|HTR3A|HTR5A	1812	DRD1	dopamine receptor D1	Known	0.7367	0.9432	0.9611	0.7778	0.5	0.5	0.9992	8	0	1	0	0	0	0	1	1	0.0278	Y	1	FALSE	TRUE
BRD-K37289225	clozapine	serotonin receptor antagonist|dopamine receptor antagonist|adrenergic receptor antagonist, DRD2|DRD4|ADRA1A|ADRA1B|CHRM1|DRD1|DRD3|HRH1|HRH4|HTR1A|HTR1B|HTR1D|HTR1E|HTR2A|HTR2C|HTR6|HTR7|ADRA1D|ADRA2A|ADRA2B|ADRA2C|CALY|CHRM2|CHRM3|CHRM4|CHRM5|CYP2C19|DRD5|HTR1F|HTR2B|HTR3A|HTR5A	3269	HRH1	histamine receptor H1	Known	0.7501	0.9427	0.9611	0.7778	0.5	0.5	0.9992	8	0	1	0	0	0	0	1	1	0.0231	Y	1	FALSE	TRUE
BRD-K39915878	loxapine	dopamine receptor antagonist|serotonin receptor antagonist|dopamine receptor ligand, DRD2|DRD3|DRD4|DRD1|HRH1|HTR2A|HTR2C|HTR6|ADRA1A|ADRA1B|ADRA2A|ADRA2B|ADRA2C|ADRB1|CHRM1|CHRM2|CHRM3|CHRM4|CHRM5|DRD5|HRH2|HRH4|HTR1A|HTR1B|HTR1D|HTR1E|HTR3A|HTR5A|HTR7|SLC6A2|SLC6A3|SLC6A4	1128	CHRM1	cholinergic receptor muscarinic 1	Known	0.7084	0.9458	0.9611	0.9092	0.5	0.5	0.9992	8	0	1	0	0	1	0	0	1	0.0402	Y	1	FALSE	TRUE
BRD-K39983086	loteprednol	corticosteroid agonist|phospholipase inhibitor, NR3C1	301	ANXA1	annexin A1	pQSAR	0.8317	0.9341	0.9449	0.6163	0.5	0.5	0.9992	2	1	1	0	0	0	0	0	0	0.0061	N	0	TRUE	FALSE
BRD-K49577446	flunisolide	cytochrome P450 inhibitor|corticosteroid agonist|corticosteroid hormone receptor agonist|glucocorticoid receptor agonist|immunosuppressant, NR3C1	2908	NR3C1	nuclear receptor subfamily 3 group C member 1	Known	0.7182	0.9453	0.9766	0.9908	0.5	0.5	0.9992	8	0	1	0	0	1	1	0	1	0.0355	Y	1	FALSE	TRUE
BRD-K51980294	syringic-acid	carbonic anhydrase inhibitor, CA1|CA12|CA14|CA2|CA4|CA6|CA9	5743	PTGS2	prostaglandin-endoperoxide synthase 2	pQSAR	0.8951	0.9222	0.9222	0.4752	0.5	0.5	0.9992	2	1	1	0	0	0	0	0	0	0.0014	N	0	TRUE	FALSE
BRD-K53737926	amitriptyline	norepinephrine inhibitor|serotonin receptor inhibitor|sigma receptor inhibitor, CHRM1|CHRM2|CHRM3|CHRM4|CHRM5|HRH1|HTR6|SLC6A2|SLC6A4|ADRA1A|ADRA1B|ADRA1D|ADRA2A|ADRB1|ADRB2|ADRB3|HRH2|HRH4|HTR1A|HTR1B|HTR1D|HTR2A|HTR2C|HTR7|KCNA1|KCND2|KCND3|KCNQ2|KCNQ3|NTRK1|NTRK2|OPRD1|OPRK1|OPRM1|SIGMAR1	1128	CHRM1	cholinergic receptor muscarinic 1	Known	0.4967	0.9572	0.9682	0.8273	0.5	0.5	0.9992	8	0	1	0	0	1	0	1	1	0.3238	Y	1	FALSE	TRUE
BRD-K53737926	amitriptyline	norepinephrine inhibitor|serotonin receptor inhibitor|sigma receptor inhibitor, CHRM1|CHRM2|CHRM3|CHRM4|CHRM5|HRH1|HTR6|SLC6A2|SLC6A4|ADRA1A|ADRA1B|ADRA1D|ADRA2A|ADRB1|ADRB2|ADRB3|HRH2|HRH4|HTR1A|HTR1B|HTR1D|HTR2A|HTR2C|HTR7|KCNA1|KCND2|KCND3|KCNQ2|KCNQ3|NTRK1|NTRK2|OPRD1|OPRK1|OPRM1|SIGMAR1	1131	CHRM3	cholinergic receptor muscarinic 3	Known	0.5166	0.9572	0.9682	0.8273	0.5	0.5	0.9992	8	0	1	0	0	1	0	1	1	0.2786	Y	1	FALSE	TRUE
BRD-K54759182	dosulepin	adrenergic transmitter uptake inhibitor|norepinephrine reuptake inhibitor|serotonin reuptake inhibitor|serotonin uptake inhibitor|tricyclic antidepressant, SLC6A2|SLC6A4|CHRM1|CHRM2|CHRM3|CHRM4|CHRM5|CYP2C19|HRH1	1131	CHRM3	cholinergic receptor muscarinic 3	Known	0.5722	0.9536	0.9682	0.8273	0.5	0.5	0.9992	8	0	1	0	0	1	0	0	1	0.1739	Y	1	FALSE	TRUE
BRD-K59058766	chlorprothixene	dopamine receptor|dopamine receptor antagonist, DRD2|CHRM1|CHRM2|CHRM3|CHRM4|CHRM5|DRD1|DRD3|HRH1|HTR2A|HTR2B|HTR2C	1131	CHRM3	cholinergic receptor muscarinic 3	Known	0.701	0.9461	0.9766	0.9908	0.5	0.5	0.9992	8	0	1	0	0	1	1	0	1	0.0441	Y	1	FALSE	TRUE
BRD-K62310379	fluticasone	glucocorticoid receptor agonist, NR3C1|CYP3A5|CYP3A7|NR3C2|PGR|PLA2G4A	1577	CYP3A5	cytochrome P450 family 3 subfamily A member 5	Known	0.8801	0.9263	0.9755	0.9908	0.5	0.5	0.9992	8	1	1	0	0	1	1	0	1	0.0021	Y	1	TRUE	TRUE
BRD-K63675182	triflupromazine	acetylcholine receptor ligand|dopamine receptor, HTR2B|CHRM1|CHRM2|CHRNA7|DRD1|DRD2	3269	HRH1	histamine receptor H1	StructureLikely	0.7288	0.9428	0.9647	0.9176	0.5	0.5	0.9992	5	0	1	0	0	1	0	0	0	0.0309	N	0	FALSE	TRUE
BRD-K68867920	quetiapine	dopamine receptor antagonist|serotonin receptor antagonist|adrenergic receptor antagonist|histamine receptor antagonist, DRD2|HTR1A|HTR2A|DRD1|HRH1|HTR1D|HTR1E|ADRA1A|ADRA1B|ADRA1D|ADRA2A|ADRA2B|ADRA2C|CHRM1|CHRM2|CHRM3|CHRM4|CHRM5|DRD3|DRD4|DRD5|HTR1B|HTR1F|HTR2C|HTR3A|HTR6|HTR7|SLC6A2	150	ADRA2A	adrenoceptor alpha 2A	Known	0.7806	0.9376	0.9391	0.5595	0.5	0.5	0.9992	8	0	1	0	0	0	0	0	1	0.0147	Y	1	FALSE	TRUE
BRD-K79501723	cyclizine	histamine receptor modulator, HRH1|SULT1E1	3269	HRH1	histamine receptor H1	Known	0.848	0.9302	0.9604	0.9092	0.5	0.5	0.9992	8	1	1	0	0	1	0	0	1	0.0044	Y	1	TRUE	TRUE
BRD-K80110068	cortisone	glucocorticoid receptor agonist, NR3C1	6715	SRD5A1	steroid 5 alpha-reductase 1	pQSAR	0.8684	0.9275	0.9275	0.3933	0.5	0.5	0.9992	2	1	1	0	0	0	0	0	0	0.0028	N	0	TRUE	FALSE
BRD-K81418486	vorinostat	HDAC inhibitor|cell cycle inhibitor, HDAC1|HDAC2|HDAC3|HDAC6|HDAC8|HDAC10|HDAC11|HDAC5|HDAC9	3065	HDAC1	histone deacetylase 1	Known	0.8613	0.9289	0.9323	0.8332	0.8192	0.7087	0.9992	8	1	1	0	1	1	0	1	1	0.0033	Y	1	TRUE	TRUE
BRD-K82481048	prednisolone	glucocorticoid receptor agonist, NR3C1|NR3C2|SERPINA6	1577	CYP3A5	cytochrome P450 family 3 subfamily A member 5	NCI60	0.6784	0.9466	0.9479	0.6782	0.5	0.8096	0.9992	3	0	1	1	0	0	0	0	0	0.0578	N	0	FALSE	TRUE
BRD-K89732114	trifluoperazine	breast cancer resistance protein inhibitor|calcium/calmodulin dependent protein kinase inhibitor|dopamine receptor|dopamine receptor antagonist|sodium channel blocker, DRD2|ABCG2|ADRA1A|CALM1|CALY|CAMK2A|DRD4|HRH1|HTR2A|HTR2C|S100A4|SCN4A|SCN9A|TNNC1	1812	DRD1	dopamine receptor D1	pIC50	0.8086	0.9348	0.9715	0.9207	0.5	0.5	0.9992	7	1	1	0	0	1	0	1	0	0.0093	N	0	TRUE	TRUE
BRD-K91263825	nortriptyline	PI3K inhibitor|potassium channel blocker|tricyclic antidepressant (TCA), KCNJ10|SLC6A2|SLC6A4|ADRA1A|ADRA1B|ADRA1D|ADRA2A|ADRA2B|ADRA2C|ADRB1|ADRB2|ADRB3|CHRM1|CHRM2|CHRM3|CHRM4|CHRM5|CYP2C19|DRD2|HRH1|HTR1A|HTR2A|HTR2C|HTR6|PGRMC1|PIK3CD|SIGMAR1	3269	HRH1	histamine receptor H1	Known	0.8026	0.9364	0.9572	0.7546	0.5	0.5	0.9992	8	1	1	0	0	0	0	1	1	0.0103	Y	1	TRUE	TRUE
BRD-K91966436	daunorubicin	RNA synthesis inhibitor|topoisomerase inhibitor|DNA synthesis inhibitor|radical formation stimulant, TOP2A|TOP2B	7153	TOP2A	DNA topoisomerase II alpha	Known	0.9378	0.9092	0.9754	0.9908	0.5	0.5	0.9992	8	1	1	0	0	1	1	0	1	0.0003	Y	1	TRUE	TRUE
BRD-K94649603	taxifolin	apolipoprotein secretion inhibitor|beta amyloid aggregation inhibitor|cholesterol biosynthesis inhibitor|HMGCR inhibitor|NFkB pathway modulator|opioid receptor antagonist|reverse transcriptase inhibitor, APOB|APP|HMGCR	231	AKR1B1	aldo-keto reductase family 1 member B	pQSAR	0.8361	0.9316	0.9318	0.6037	0.5	0.5	0.9992	2	1	1	0	0	0	0	0	0	0.0056	N	0	TRUE	FALSE
BRD-K97810537	beclometasone	glucocorticoid receptor agonist|corticosteroid hormone receptor agonist|immunosuppressant, NR3C1|CYP3A5|GPR97|SERPINA6	301	ANXA1	annexin A1	pQSAR	0.8014	0.9354	0.9598	0.7099	0.5	0.5	0.9992	2	1	1	0	0	0	0	0	0	0.0105	N	0	TRUE	FALSE
BRD-A07000685	hydrocortisone	corticosteroid agonist|glucocorticoid receptor agonist|immunosuppressant|interleukin receptor antagonist, ANXA1|NOS2|NR3C1|NR3C2	301	ANXA1	annexin A1	Known	0.8669	0.9243	0.9625	0.9908	0.5	0.5	0.9991	8	1	1	0	0	1	1	0	1	0.0029	Y	1	TRUE	TRUE
BRD-A07780951	orciprenaline	adrenergic receptor agonist, ADRB2	7124	TNF	tumor necrosis factor	pQSAR	0.8537	0.9259	0.9453	0.5549	0.5	0.5	0.9991	2	1	1	0	0	0	0	0	0	0.0039	N	0	TRUE	FALSE
BRD-A16311756	profenamine	butyrylcholinesterase inhibitors|cholinergic receptor antagonist|glutamate receptor antagonist, CHRM1|BCHE|CHRM2|GRIN3A	3269	HRH1	histamine receptor H1	StructureLikely	0.6184	0.9497	0.968	0.8207	0.5	0.5	0.9991	5	0	1	0	0	1	0	0	0	0.1113	N	0	FALSE	TRUE
BRD-A17448384	beclometasone	glucocorticoid receptor agonist|corticosteroid hormone receptor agonist|immunosuppressant, NR3C1|CYP3A5|GPR97|SERPINA6	301	ANXA1	annexin A1	StructureLikely	0.7673	0.9369	0.9685	0.9146	0.5	0.5	0.9991	5	0	1	0	0	1	0	0	0	0.018	N	0	FALSE	TRUE
BRD-A17448384	beclometasone	glucocorticoid receptor agonist|corticosteroid hormone receptor agonist|immunosuppressant, NR3C1|CYP3A5|GPR97|SERPINA6	866	SERPINA6	serpin family A member 6	Known	0.8171	0.9324	0.966	0.8207	0.5	0.5	0.9991	8	1	1	0	0	1	0	0	1	0.008	Y	1	TRUE	TRUE
BRD-A35108200	dexamethasone	glucocorticoid receptor agonist|corticosteroid agonist|immunosuppressant, ANXA1|CYP3A4|CYP3A5|NOS2|NR0B1|NR3C1|NR3C2	301	ANXA1	annexin A1	Known	0.7929	0.9355	0.9746	0.9908	0.5	0.8919	0.9991	8	0	1	1	0	1	1	0	1	0.0121	Y	1	FALSE	TRUE
BRD-A35588707	teniposide	topoisomerase inhibitor|DNA inhibitor|DNA repair enzyme inhibitor|mitotic inhibitor, TOP2A|CYP3A5	7155	TOP2B	DNA topoisomerase II beta	StructureLikely	0.9259	0.9092	0.9713	0.8734	0.5	0.8745	0.9991	5	1	1	1	0	1	0	0	0	0.0005	N	0	TRUE	TRUE
BRD-A46186775	hydrocortisone	corticosteroid agonist|glucocorticoid receptor agonist|immunosuppressant|interleukin receptor antagonist, ANXA1|NOS2|NR3C1|NR3C2	301	ANXA1	annexin A1	Known	0.8626	0.9241	0.9666	0.8939	0.5	0.5	0.9991	8	1	1	0	0	1	0	0	1	0.0032	Y	1	TRUE	TRUE
BRD-A47494775	dipivefrine	adrenergic receptor agonist, ADRA1A|ACHE|ADRA2A|ADRB2|BCHE	154	ADRB2	adrenoceptor beta 2	Known	0.8561	0.9252	0.9252	0.6606	0.5	0.5	0.9991	8	1	1	0	0	0	0	0	1	0.0037	Y	1	TRUE	TRUE
BRD-A62184259	cycloheximide	glycogen synthase kinase inhibitor|protein synthesis inhibitor, GSK3B|RPL3	3551	IKBKB	inhibitor of nuclear factor kappa B kinase subunit beta	pQSAR	0.9259	0.9096	0.9096	0.1233	0.6296	0.5771	0.9991	2	1	1	0	0	0	0	0	0	0.0005	N	0	TRUE	FALSE
BRD-A62184259	cycloheximide	glycogen synthase kinase inhibitor|protein synthesis inhibitor, GSK3B|RPL3	6097	RORC	RAR related orphan receptor C	pIC50	0.913	0.9146	0.9146	0.1248	0.6883	0.4922	0.9991	7	1	1	0	0	0	0	1	0	0.0008	N	0	TRUE	TRUE
BRD-A71459254	cymarin	ATPase inhibitor, ATP1A1	478	ATP1A3	ATPase Na+/K+ transporting subunit alpha 3	StructureLikely	0.5738	0.9519	0.9621	0.8044	0.7891	0.5	0.9991	5	0	1	0	0	1	0	0	0	0.1713	N	0	FALSE	TRUE
BRD-A76279427	myriocin	sphingolipid biosynthesis inhibitor, AKT1|SPTLC1|SPTLC2|SPTLC3	5465	PPARA	peroxisome proliferator activated receptor alpha	pQSAR	0.946	0.9016	0.9259	0.5504	0.5	0.5	0.9991	2	1	1	0	0	0	0	0	0	0.0002	N	0	TRUE	FALSE
BRD-A78322124	dobutamine	adrenergic receptor agonist, ADRB1|ADRB2|ADRA1A	154	ADRB2	adrenoceptor beta 2	Known	0.83	0.9305	0.9364	0.6782	0.5	0.5	0.9991	8	1	1	0	0	0	0	0	1	0.0063	Y	1	TRUE	TRUE
BRD-K00198051	zuclopenthixol	dopamine receptor antagonist, DRD2|DRD1|ADRA1A|ADRA2A|DRD5|HRH1|HTR2A	3269	HRH1	histamine receptor H1	Known	0.7684	0.9372	0.9609	0.9908	0.5	0.5	0.9991	8	0	1	0	0	1	1	1	1	0.0177	Y	1	FALSE	TRUE
BRD-K11590034	morin	antioxidant, ADORA2A|CYP1A2|ESR2|FASN|MCL1|SLC22A12	1956	EGFR	epidermal growth factor receptor	StructureLikely	0.9259	0.9092	0.9595	0.8432	0.5	0.5	0.9991	5	1	1	0	0	1	0	0	0	0.0005	N	0	TRUE	TRUE
BRD-K16551401	PNU-22394	serotonin receptor agonist, MAOA|MAOB	150	ADRA2A	adrenoceptor alpha 2A	pQSAR	0.8561	0.9268	0.9274	0.5685	0.5	0.5	0.9991	2	1	1	0	0	0	0	0	0	0.0037	N	0	TRUE	FALSE
BRD-K21401044	danazol	estrogen receptor antagonist|luteinizing hormone releasing hormone antagonist|progesterone receptor agonist|steroid derivative with antigonadotropic and anti-estrogenic activities|tumor necrosis factor modulator, ESR1|GNRHR|AR|CCL2|CYP2C8|GNRHR2|PGR|TNF	367	AR	androgen receptor	Known	0.8927	0.9191	0.9765	0.9908	0.5	0.5	0.9991	8	1	1	0	0	1	1	0	1	0.0015	Y	1	TRUE	TRUE
BRD-K22227508	targinine	nitric oxide synthase inhibitor, NOS2|NOS3	1786	DNMT1	DNA methyltransferase 1	pQSAR	0.9062	0.9156	0.9156	0.3039	0.5	0.5	0.9991	2	1	1	0	0	0	0	0	0	0.001	N	0	TRUE	FALSE
BRD-K23714869	triamcinolone	antiinflammatory agent|corticosteroid agonist|corticosteroid binding globulin binder|corticosteroid hormone receptor agonist|cytochrome P450 inhibitor|glucocorticoid receptor agonist|immunosuppressant|immunosuppressive agent, NR3C1|CYP3A5|CYP3A7|SERPINA6	301	ANXA1	annexin A1	StructureSure	0.6761	0.9458	0.9737	0.9683	0.5	0.5	0.9991	6	0	1	0	0	1	1	0	0	0.0594	N	0	FALSE	TRUE
BRD-K24473282	isoprenaline	adrenergic receptor agonist, ADRB1|ADRB2|ADRB3|MAPK1|PIK3R1|PIK3R2|PIK3R3	154	ADRB2	adrenoceptor beta 2	Known	0.6513	0.9464	0.9771	0.9908	0.5	0.5	0.9991	8	0	1	0	0	1	1	1	1	0.0786	Y	1	FALSE	TRUE
BRD-K28542495	benzydamine	membrane integrity inhibitor|prostanoid receptor inhibitor, PRSS1|PRSS2	152	ADRA2C	adrenoceptor alpha 2C	pQSAR	0.9259	0.9116	0.9116	0.3933	0.5	0.5	0.9991	2	1	1	0	0	0	0	0	0	0.0005	N	0	TRUE	FALSE
BRD-K38436528	imipramine	norepinephrine reputake inhibitor|serotonin reuptake inhibitor|Sodium Channel Blockers, SLC6A2|SLC6A4|CHRM2|ADRA1A|ADRA1B|ADRA1D|CHRM1|CHRM3|CHRM4|CHRM5|CYP2C19|DRD1|DRD2|DRD5|HRH1|HTR1A|HTR2A|HTR2C|HTR6|HTR7|KCND2|KCND3|KCNH1|KCNH2|SLC6A3	3269	HRH1	histamine receptor H1	Known	0.5878	0.9512	0.9662	0.7833	0.5	0.5	0.9991	8	0	1	0	0	0	0	1	1	0.1503	Y	1	FALSE	TRUE
BRD-K39965020	doconexent	PPAR receptor agonist|unidentified pharmacological activity, FFAR1|PPARA|PTGS1|PTGS2	5468	PPARG	peroxisome proliferator activated receptor gamma	StructureLikely	0.7367	0.9416	0.9719	0.9299	0.5	0.5	0.9991	5	0	1	0	0	1	0	0	0	0.0278	N	0	FALSE	TRUE
BRD-K41731458	triclosan	DNA methyltransferase inhibitor|enoyl-(acyl-carrier protein) reductase Fabl inhibitor|enoyl-[acyl-carrier-protein] reductase [NADH] inhibitor, DNMT1	2100	ESR2	estrogen receptor 2	pQSAR	0.8491	0.928	0.928	0.4824	0.5	0.5	0.9991	2	1	1	0	0	0	0	0	0	0.0043	N	0	TRUE	FALSE
BRD-K41859756	NVP-AUY922	HSP inhibitor, HSP90AA1|HSP90AA2|HSP90AB1	7846	TUBA1A	tubulin alpha 1a	pQSAR	0.884	0.9213	0.9213	0.146	0.5	0.5	0.9991	2	1	1	0	0	0	0	0	0	0.0019	N	0	TRUE	FALSE
BRD-K43887077	dopamine	dopamine receptor agonist, DRD2|DRD1|DRD3|DRD4|DRD5|DBH|HTR1A|HTR7|SLC6A2|SLC6A3|SLC6A4	154	ADRB2	adrenoceptor beta 2	pQSAR	0.8525	0.9278	0.9473	0.6163	0.5	0.5	0.9991	2	1	1	0	0	0	0	0	0	0.004	N	0	TRUE	FALSE
BRD-K47635719	dexamethasone	glucocorticoid receptor agonist|corticosteroid agonist|immunosuppressant, ANXA1|CYP3A4|CYP3A5|NOS2|NR0B1|NR3C1|NR3C2	2908	NR3C1	nuclear receptor subfamily 3 group C member 1	Known	0.712	0.9413	0.977	0.9908	0.5	0.5	0.9991	8	0	1	0	0	1	1	1	1	0.0384	Y	1	FALSE	TRUE
BRD-K50199947	WH-4023	src inhibitor, ABL1|LCK|SRC	7465	WEE1	WEE1 G2 checkpoint kinase	pQSAR	0.8334	0.9292	0.9292	0.5165	0.5	0.5	0.9991	2	1	1	0	0	0	0	0	0	0.0059	N	0	TRUE	FALSE
BRD-K52911425	GDC-0941	PI3K inhibitor, PIK3CG|PIK3CA|PIK3CB|PIK3CD	5294	PIK3CG	phosphatidylinositol-4,5-bisphosphate 3-kinase catalytic subunit gamma	Known	0.8699	0.9241	0.9241	0.3265	0.5	0.5	0.9991	8	1	1	0	0	0	0	1	1	0.0027	Y	1	TRUE	TRUE
BRD-K54759182	dosulepin	adrenergic transmitter uptake inhibitor|norepinephrine reuptake inhibitor|serotonin reuptake inhibitor|serotonin uptake inhibitor|tricyclic antidepressant, SLC6A2|SLC6A4|CHRM1|CHRM2|CHRM3|CHRM4|CHRM5|CYP2C19|HRH1	150	ADRA2A	adrenoceptor alpha 2A	StructureLikely	0.7633	0.9378	0.9682	0.8273	0.5	0.5	0.9991	5	0	1	0	0	1	0	0	0	0.0191	N	0	FALSE	TRUE
BRD-K57080016	selumetinib	MEK inhibitor|MAP kinase inhibitor, MAP2K1|MAP2K2	5605	MAP2K2	mitogen-activated protein kinase kinase 2	Known	0.815	0.9318	0.9318	0.5765	0.5	0.8546	0.9991	8	1	1	1	0	0	0	0	1	0.0083	Y	1	TRUE	TRUE
BRD-K60762818	desipramine	norepinephrine transporter inhibitor|Sodium Channel Blockers|tricyclic antidepressant (TCA), SLC6A2|SLC6A4|ADRA1A|ADRA1B|ADRA1D|ADRA2A|ADRA2B|ADRA2C|ADRB1|ADRB2|CHRM1|CHRM2|CHRM3|CHRM4|CHRM5|DRD2|HRH1|HTR1A|HTR2A|HTR2C|SMPD1	3269	HRH1	histamine receptor H1	Known	0.679	0.9449	0.9609	0.7724	0.5	0.5	0.9991	8	0	1	0	0	0	0	1	1	0.0574	Y	1	FALSE	TRUE
BRD-K70358946	aripiprazole	serotonin receptor agonist|serotonin receptor antagonist|dopamine receptor agonist|dopamine receptor partial agonist|serotonin receptor partial agonist, DRD2|HTR1A|HTR2A|HRH1|HTR1B|HTR1D|HTR2C|ADRA1A|ADRA1B|ADRA2A|ADRA2B|ADRA2C|CHRM1|CHRM2|CHRM3|CHRM4|CHRM5|DRD1|DRD3|DRD4|DRD5|HTR1E|HTR3A|HTR6|HTR7	3269	HRH1	histamine receptor H1	Known	0.83	0.9311	0.9311	0.4967	0.5	0.5	0.9991	8	1	1	0	0	0	0	1	1	0.0063	Y	1	TRUE	TRUE
BRD-K70592963	phenindione	vitamin antagonist, VKORC1	4128	MAOA	monoamine oxidase A	pQSAR	0.8765	0.9231	0.9231	0.3933	0.5	0.5	0.9991	2	1	1	0	0	0	0	0	0	0.0023	N	0	TRUE	FALSE
BRD-K79602928	metformin	insulin sensitizer|AMPK activator|biguanide|gluconeogenesis inhibitor, ACACB|INS|PRKAB1	1131	CHRM3	cholinergic receptor muscarinic 3	pQSAR	0.8669	0.9241	0.9241	0.1112	0.5	0.5	0.9991	2	1	1	0	0	0	0	0	0	0.0029	N	0	TRUE	FALSE
BRD-K82216340	medroxyprogesterone	progesterone receptor agonist, PGR|ESR1	866	SERPINA6	serpin family A member 6	pQSAR	0.8292	0.9317	0.9317	0.4967	0.5	0.5	0.9991	2	1	1	0	0	0	0	0	0	0.0064	N	0	TRUE	FALSE
BRD-K84443303	clobetasol	glucocorticoid receptor agonist, NR3C1|PLA2G1B	2908	NR3C1	nuclear receptor subfamily 3 group C member 1	Known	0.7723	0.9369	0.9765	0.9908	0.5	0.5	0.9991	8	0	1	0	0	1	1	1	1	0.0167	Y	1	FALSE	TRUE
BRD-K88677950	PD-198306	MAP kinase inhibitor|MEK inhibitor, MAP2K1|MAP2K2|MAPK1|MAPK3	5605	MAP2K2	mitogen-activated protein kinase kinase 2	Known	0.8199	0.9318	0.96	0.8207	0.5	0.5	0.9991	8	1	1	0	0	1	0	0	1	0.0076	Y	1	TRUE	TRUE
BRD-K89732114	trifluoperazine	breast cancer resistance protein inhibitor|calcium/calmodulin dependent protein kinase inhibitor|dopamine receptor|dopamine receptor antagonist|sodium channel blocker, DRD2|ABCG2|ADRA1A|CALM1|CALY|CAMK2A|DRD4|HRH1|HTR2A|HTR2C|S100A4|SCN4A|SCN9A|TNNC1	3269	HRH1	histamine receptor H1	Known	0.786	0.9348	0.9715	0.9207	0.5	0.5	0.9991	8	0	1	0	0	1	0	1	1	0.0135	Y	1	FALSE	TRUE
BRD-K95309561	dienestrol	estrogen receptor agonist, ESR1	2099	ESR1	estrogen receptor 1	Known	0.5999	0.9492	0.9492	0.9908	0.5	0.5	0.9991	8	0	1	0	0	1	1	1	1	0.1338	Y	1	FALSE	TRUE
BRD-K95309561	dienestrol	estrogen receptor agonist, ESR1	771	CA12	carbonic anhydrase 12	pQSAR	0.9062	0.9175	0.9175	0.2931	0.5	0.5	0.9991	2	1	1	0	0	0	0	0	0	0.001	N	0	TRUE	FALSE
BRD-A19195498	trimipramine	adrenergic transmitter uptake inhibitor|dopamine receptor|norepinephrine transporter inhibitor|serotonin transporter (SERT) inhibitor|serotonin uptake inhibitor|tricyclic antidepressant|tricyclic antidepressant (TCA), SLC6A2|SLC6A4|SLC6A3|ADRA1A|ADRA1B|ADRA2A|ADRA2B|ADRB1|ADRB2|ADRB3|CHRM1|CHRM2|CHRM3|CHRM4|CHRM5|DRD1|DRD2|DRD5|HRH1|HTR1A|HTR1D|HTR2A|HTR2C|HTR3A	1128	CHRM1	cholinergic receptor muscarinic 1	Known	0.4783	0.9544	0.9544	0.7376	0.5	0.5	0.999	8	0	1	0	0	0	0	0	1	0.3689	Y	1	FALSE	TRUE
BRD-A19195498	trimipramine	adrenergic transmitter uptake inhibitor|dopamine receptor|norepinephrine transporter inhibitor|serotonin transporter (SERT) inhibitor|serotonin uptake inhibitor|tricyclic antidepressant|tricyclic antidepressant (TCA), SLC6A2|SLC6A4|SLC6A3|ADRA1A|ADRA1B|ADRA2A|ADRA2B|ADRB1|ADRB2|ADRB3|CHRM1|CHRM2|CHRM3|CHRM4|CHRM5|DRD1|DRD2|DRD5|HRH1|HTR1A|HTR1D|HTR2A|HTR2C|HTR3A	1812	DRD1	dopamine receptor D1	Known	0.632	0.9452	0.953	0.7376	0.5	0.5	0.999	8	0	1	0	0	0	0	1	1	0.0967	Y	1	FALSE	TRUE
BRD-A19661776	mianserin	serotonin receptor antagonist|tetracyclic antidepressant, HTR2A|HTR2C|ADRA1A|ADRA1B|ADRA1D|HRH1|HTR2B|HTR6|HTR7|ADRA2A|ADRA2B|ADRA2C|DRD1|DRD2|DRD3|DRD5|HRH2|HRH4|HTR1A|HTR1F|OPRK1|SLC6A2|SLC6A3|SLC6A4	154	ADRB2	adrenoceptor beta 2	StructureLikely	0.6001	0.9481	0.9481	0.814	0.5	0.5	0.999	5	0	1	0	0	1	0	0	0	0.1336	N	0	FALSE	TRUE
BRD-A19661776	mianserin	serotonin receptor antagonist|tetracyclic antidepressant, HTR2A|HTR2C|ADRA1A|ADRA1B|ADRA1D|HRH1|HTR2B|HTR6|HTR7|ADRA2A|ADRA2B|ADRA2C|DRD1|DRD2|DRD3|DRD5|HRH2|HRH4|HTR1A|HTR1F|OPRK1|SLC6A2|SLC6A3|SLC6A4	3269	HRH1	histamine receptor H1	Known	0.5978	0.949	0.9523	0.814	0.5	0.5	0.999	8	0	1	0	0	1	0	1	1	0.1366	Y	1	FALSE	TRUE
BRD-A46186775	hydrocortisone	corticosteroid agonist|glucocorticoid receptor agonist|immunosuppressant|interleukin receptor antagonist, ANXA1|NOS2|NR3C1|NR3C2	1577	CYP3A5	cytochrome P450 family 3 subfamily A member 5	pQSAR	0.8459	0.9259	0.9259	0.6205	0.5	0.5	0.999	2	1	1	0	0	0	0	0	0	0.0046	N	0	TRUE	FALSE
BRD-A48720949	testosterone	androgen receptor (AR) agonist|androgen receptor agonist|testosterone receptor agonist, AR|CYP19A1|CYP2C19|CYP2C8|CYP3A5	2099	ESR1	estrogen receptor 1	pQSAR	0.8514	0.925	0.9576	0.7778	0.5	0.5	0.999	2	1	1	0	0	0	0	0	0	0.0041	N	0	TRUE	FALSE
BRD-A49225603	alimemazine	histamine receptor ligand, HRH1	5293	PIK3CD	phosphatidylinositol-4,5-bisphosphate 3-kinase catalytic subunit delta	pQSAR	0.8783	0.919	0.919	0.1379	0.5	0.5	0.999	2	1	1	0	0	0	0	0	0	0.0022	N	0	TRUE	FALSE
BRD-A53576514	orphenadrine	acetylcholine receptor antagonist, CYP2B6|GRIN1|GRIN2D|GRIN3A|GRIN3B|HRH1|SCN10A|SLC6A2	152	ADRA2C	adrenoceptor alpha 2C	pQSAR	0.848	0.9263	0.9263	0.3039	0.5	0.5	0.999	2	1	1	0	0	0	0	0	0	0.0044	N	0	TRUE	FALSE
BRD-A65449987	flunisolide	cytochrome P450 inhibitor|corticosteroid agonist|corticosteroid hormone receptor agonist|glucocorticoid receptor agonist|immunosuppressant, NR3C1	866	SERPINA6	serpin family A member 6	StructureLikely	0.884	0.9181	0.9666	0.8298	0.5	0.5	0.999	5	1	1	0	0	1	0	0	0	0.0019	N	0	TRUE	TRUE
BRD-A78322124	dobutamine	adrenergic receptor agonist, ADRB1|ADRB2|ADRA1A	5295	PIK3R1	phosphoinositide-3-kinase regulatory subunit 1	pQSAR	0.8221	0.9287	0.9287	0.538	0.5	0.5	0.999	2	1	1	0	0	0	0	0	0	0.0073	N	0	TRUE	FALSE
BRD-A92177080	betamethasone	corticosteroid agonist|glucocorticoid receptor agonist, NR3C1	301	ANXA1	annexin A1	StructureSure	0.7976	0.932	0.9772	0.9908	0.5	0.5	0.999	6	0	1	0	0	1	1	0	0	0.0112	N	0	FALSE	TRUE
BRD-K07572174	curcumin	cyclooxygenase inhibitor|AP inhibitor|CCN expression inhibitor|DNA methyltransferase inhibitor|EGFR expression inhibitor|free radical scavenger|FtsZ inhibitor|glucose 6 phosphatase inhibitor|histone N-acetyltransferase inhibitor|HIV integrase inhibitor|lipoxygenase inhibitor|NFkB pathway inhibitor|tau aggregation inhibitor|unidentified pharmacological activity, PTGS1|PTGS2|APP|CA1|CA12|CA14|CA2|C…	1956	EGFR	epidermal growth factor receptor	pQSAR	0.884	0.9183	0.9183	0.538	0.5	0.7562	0.999	2	1	1	0	0	0	0	0	0	0.0019	N	0	TRUE	FALSE
BRD-K10467831	tibolone	estrogen receptor agonist|androgen receptor agonist|progesterone receptor agonist|selective estrogen receptor modulator (SERM)|steryl sulfatase inhibitor, AR|ESR1|PGR|STS	2099	ESR1	estrogen receptor 1	Known	0.8043	0.9313	0.9313	0.581	0.5	0.5	0.999	8	1	1	0	0	0	0	0	1	0.01	Y	1	TRUE	TRUE
BRD-K13688115	medrysone	corticosteroid hormone receptor agonist|glucocorticoid receptor agonist, NR3C1	2908	NR3C1	nuclear receptor subfamily 3 group C member 1	Known	0.6167	0.9469	0.9493	0.9908	0.5	0.5	0.999	8	0	1	0	0	1	1	1	1	0.1132	Y	1	FALSE	TRUE
BRD-K14965640	ibuprofen	cyclooxygenase inhibitor|NFkB pathway inhibitor, PTGS2|PTGS1|ASIC1|BCL2|CFTR|CYP2C8|FABP2|PLAT|PPARG|SLC5A8|THBD	1577	CYP3A5	cytochrome P450 family 3 subfamily A member 5	pQSAR	0.8715	0.9212	0.9212	0.2419	0.5	0.5	0.999	2	1	1	0	0	0	0	0	0	0.0026	N	0	TRUE	FALSE
BRD-K18194590	mephentermine	adrenergic receptor agonist, ADRA1A|ADRA1B|ADRA1D|ADRA2A|ADRA2B|ADRA2C|ADRB1|ADRB2|ADRB3	154	ADRB2	adrenoceptor beta 2	Known	0.7747	0.9351	0.9351	0.9908	0.5	0.5	0.999	8	0	1	0	0	1	1	0	1	0.0161	Y	1	FALSE	TRUE
BRD-K22936972	diphenylpyraline	dopamine reuptake inhibitor|histamine receptor antagonist, HRH1|SLC6A3	3269	HRH1	histamine receptor H1	Known	0.7348	0.9385	0.9586	0.7465	0.5	0.5	0.999	8	0	1	0	0	0	0	0	1	0.0285	Y	1	FALSE	TRUE
BRD-K29173907	isoflupredone	glucocorticoid receptor agonist, NR3C1	2099	ESR1	estrogen receptor 1	pQSAR	0.8783	0.919	0.9479	0.6447	0.5	0.5	0.999	2	1	1	0	0	0	0	0	0	0.0022	N	0	TRUE	FALSE
BRD-K30649484	mafenide	carbonic anhydrase inhibitor|unidentified pharmacological activity, CA6|CA12|CA14|CA2|CA4|CA9	760	CA2	carbonic anhydrase 2	Known	0.83	0.9267	0.9267	0.4967	0.5	0.5	0.999	8	1	1	0	0	0	0	0	1	0.0063	Y	1	TRUE	TRUE
BRD-K35559145	levomepromazine	dopamine receptor, ADRA1A|ADRA1B|ADRA1D|ADRA2A|ADRA2B|ADRA2C|CHRM1|CHRM2|CHRM3|CHRM4|CHRM5|DRD1|DRD2|DRD3|DRD4|DRD5|HRH1|HTR2A|HTR2C	1812	DRD1	dopamine receptor D1	Known	0.6668	0.9441	0.9441	0.6878	0.5	0.5	0.999	8	0	1	0	0	0	0	1	1	0.0661	Y	1	FALSE	TRUE
BRD-K37814297	acepromazine	dopamine receptor antagonist, ADRA1A|ADRA1B|DRD1|DRD2|HTR1A|HTR2A	3269	HRH1	histamine receptor H1	StructureLikely	0.7856	0.9336	0.9567	0.8073	0.5	0.5	0.999	5	0	1	0	0	1	0	0	0	0.0136	N	0	FALSE	TRUE
BRD-K43887077	dopamine	dopamine receptor agonist, DRD2|DRD1|DRD3|DRD4|DRD5|DBH|HTR1A|HTR7|SLC6A2|SLC6A3|SLC6A4	5743	PTGS2	prostaglandin-endoperoxide synthase 2	pIC50	0.884	0.9189	0.9189	0.4608	0.5	0.5	0.999	7	1	1	0	0	0	0	1	0	0.0019	N	0	TRUE	TRUE
BRD-K47036706	fluocinonide	corticosteroid agonist|corticosteroid hormone receptor agonist, NR3C1|SERPINA6|SMO	2908	NR3C1	nuclear receptor subfamily 3 group C member 1	Known	0.5979	0.9489	0.9719	0.9908	0.5	0.5	0.999	8	0	1	0	0	1	1	0	1	0.1364	Y	1	FALSE	TRUE
BRD-K58685305	emodin	11-beta hydroxysteroid dehydrogenase inhibitor, CSNK2A1|CSNK2A2|CSNK2B|IL6|PTP4A3	3156	HMGCR	3-hydroxy-3-methylglutaryl-CoA reductase	pQSAR	0.8137	0.9287	0.9287	0.4049	0.5	0.6608	0.999	2	1	1	0	0	0	0	0	0	0.0085	N	0	TRUE	FALSE
BRD-K60762818	desipramine	norepinephrine transporter inhibitor|Sodium Channel Blockers|tricyclic antidepressant (TCA), SLC6A2|SLC6A4|ADRA1A|ADRA1B|ADRA1D|ADRA2A|ADRA2B|ADRA2C|ADRB1|ADRB2|CHRM1|CHRM2|CHRM3|CHRM4|CHRM5|DRD2|HRH1|HTR1A|HTR2A|HTR2C|SMPD1	1131	CHRM3	cholinergic receptor muscarinic 3	Known	0.6775	0.9429	0.9609	0.7724	0.5	0.5	0.999	8	0	1	0	0	0	0	0	1	0.0584	Y	1	FALSE	TRUE
BRD-K73978287	hydrocortisone	corticosteroid agonist|glucocorticoid receptor agonist|immunosuppressant|interleukin receptor antagonist, ANXA1|NOS2|NR3C1|NR3C2	301	ANXA1	annexin A1	Known	0.8537	0.9243	0.9625	0.9908	0.5	0.5	0.999	8	1	1	0	0	1	1	0	1	0.0039	Y	1	TRUE	TRUE
BRD-K75037734	carbachol	cholinergic, CHRM1|CHRM2|CHRNA2|CHRM3|CHRM4|CHRM5	32	ACACB	acetyl-CoA carboxylase beta	pQSAR	0.8514	0.9241	0.9241	0.1081	0.5	0.5	0.999	2	1	1	0	0	0	0	0	0	0.0041	N	0	TRUE	FALSE
BRD-K81418486	vorinostat	HDAC inhibitor|cell cycle inhibitor, HDAC1|HDAC2|HDAC3|HDAC6|HDAC8|HDAC10|HDAC11|HDAC5|HDAC9	8841	HDAC3	histone deacetylase 3	Known	0.8192	0.9289	0.9289	0.7156	0.8192	0.7087	0.999	8	1	1	0	1	0	0	1	1	0.0077	Y	1	TRUE	TRUE
BRD-K81774264	flumethasone	glucocorticoid receptor agonist., NR3C1|PLA2G1B	2908	NR3C1	nuclear receptor subfamily 3 group C member 1	Known	0.6249	0.9469	0.9706	0.9908	0.5	0.5	0.999	8	0	1	0	0	1	1	0	1	0.1041	Y	1	FALSE	TRUE
BRD-K81774264	flumethasone	glucocorticoid receptor agonist., NR3C1|PLA2G1B	866	SERPINA6	serpin family A member 6	StructureLikely	0.6032	0.9469	0.9674	0.8207	0.5	0.5	0.999	5	0	1	0	0	1	0	0	0	0.1296	N	0	FALSE	TRUE
BRD-K82236179	dicoumarol	NADPH quinone oxidoreductase 1 inhibitor, NQO1|VKORC1|CRYZ	2099	ESR1	estrogen receptor 1	pQSAR	0.8408	0.9257	0.9257	0.4398	0.5	0.5	0.999	2	1	1	0	0	0	0	0	0	0.0051	N	0	TRUE	FALSE
BRD-K82481048	prednisolone	glucocorticoid receptor agonist, NR3C1|NR3C2|SERPINA6	301	ANXA1	annexin A1	NCI60	0.7074	0.9413	0.9598	0.7177	0.5	0.8096	0.999	3	0	1	1	0	0	0	0	0	0.0407	N	0	FALSE	TRUE
BRD-K83597974	pargyline	monoamine oxidase inhibitor, MAOB|MAOA	4129	MAOB	monoamine oxidase B	Known	0.8334	0.9284	0.9437	0.6983	0.5	0.5	0.999	8	1	1	0	0	0	0	0	1	0.0059	Y	1	TRUE	TRUE
BRD-K89014967	AS-703026	MEK inhibitor, MAP2K1|MAP2K2	5604	MAP2K1	mitogen-activated protein kinase kinase 1	Known	0.8613	0.9219	0.9219	0.7128	0.5	0.5	0.999	8	1	1	0	0	0	0	1	1	0.0033	Y	1	TRUE	TRUE
BRD-K96809896	SKF-86002	p38 MAPK inhibitor, ALOX5|MAPK14	1432	MAPK14	mitogen-activated protein kinase 14	Known	0.9168	0.9084	0.9217	0.5856	0.5	0.5	0.999	8	1	1	0	0	0	0	1	1	0.0007	Y	1	TRUE	TRUE
BRD-K97810537	beclometasone	glucocorticoid receptor agonist|corticosteroid hormone receptor agonist|immunosuppressant, NR3C1|CYP3A5|GPR97|SERPINA6	1577	CYP3A5	cytochrome P450 family 3 subfamily A member 5	Known	0.5697	0.9506	0.9762	0.9908	0.5	0.5	0.999	8	0	1	0	0	1	1	0	1	0.1779	Y	1	FALSE	TRUE
BRD-K99545815	PF-562271	focal adhesion kinase inhibitor|angiogenesis inhibitor|apoptosis stimulant, PTK2|PTK2B	2932	GSK3B	glycogen synthase kinase 3 beta	pIC50	0.8514	0.9245	0.9245	0.3613	0.5	0.5	0.999	7	1	1	0	0	0	0	1	0	0.0041	N	0	TRUE	TRUE
BRD-A13122391	triptolide	RNA polymerase inhibitor, CYP2C19|RELA	1022	CDK7	cyclin dependent kinase 7	pQSAR	0.884	0.9143	0.9143	0.1338	0.6819	0.6466	0.9989	2	1	1	0	0	0	0	0	0	0.0019	N	0	TRUE	FALSE
BRD-A16478930	amcinonide	corticosteroid agonist|cytochrome P450 inhibitor|glucocorticoid receptor agonist|immunosuppressant, NR3C1|ANXA1	301	ANXA1	annexin A1	Known	0.8514	0.9225	0.96	0.9908	0.5	0.5	0.9989	8	1	1	0	0	1	1	0	1	0.0041	Y	1	TRUE	TRUE
BRD-A26095496	clobetasol	glucocorticoid receptor agonist, NR3C1|PLA2G1B	866	SERPINA6	serpin family A member 6	StructureLikely	0.8137	0.9265	0.9674	0.8803	0.5	0.5	0.9989	5	1	1	0	0	1	0	0	0	0.0085	N	0	TRUE	TRUE
BRD-A33711280	metixene	acetylcholine receptor antagonist, CHRM5|CHRM1|CHRM2|CHRM3|CHRM4	1131	CHRM3	cholinergic receptor muscarinic 3	Known	0.7094	0.9392	0.9392	0.5595	0.5	0.5	0.9989	8	0	1	0	0	0	0	0	1	0.0397	Y	1	FALSE	TRUE
BRD-A34806832	proscillaridin	ATPase inhibitor, ATP1A1	478	ATP1A3	ATPase Na+/K+ transporting subunit alpha 3	NCI60	0.4907	0.9518	0.9571	0.6079	0.5434	0.8223	0.9989	3	0	1	1	0	0	0	0	0	0.3381	N	0	FALSE	TRUE
BRD-A43974575	tranylcypromine	cytochrome P450 inhibitor|histone lysine demethylase inhibitor|monoamine oxidase inhibitor, MAOA|MAOB|KDM1A|CYP2A6	4129	MAOB	monoamine oxidase B	Known	0.7545	0.9342	0.9772	0.9908	0.5	0.5	0.9989	8	0	1	0	0	1	1	0	1	0.0217	Y	1	FALSE	TRUE
BRD-A54487287	cortisone	glucocorticoid receptor agonist, NR3C1	2908	NR3C1	nuclear receptor subfamily 3 group C member 1	Known	0.7719	0.9314	0.967	0.9115	0.5	0.5	0.9989	8	0	1	0	0	1	0	0	1	0.0168	Y	1	FALSE	TRUE
BRD-A59985574	topotecan	topoisomerase inhibitor, TOP1|TOP1MT	7155	TOP2B	DNA topoisomerase II beta	pQSAR	0.8586	0.92	0.92	0.15	0.5	0.5	0.9989	2	1	1	0	0	0	0	0	0	0.0035	N	0	TRUE	FALSE
BRD-A71459254	cymarin	ATPase inhibitor, ATP1A1	481	ATP1B1	ATPase Na+/K+ transporting subunit beta 1	StructureLikely	0.4904	0.9519	0.9621	0.8044	0.7891	0.5	0.9989	5	0	1	0	0	1	0	0	0	0.3389	N	0	FALSE	TRUE
BRD-A75172220	hydrocortisone	corticosteroid agonist|glucocorticoid receptor agonist|immunosuppressant|interleukin receptor antagonist, ANXA1|NOS2|NR3C1|NR3C2	301	ANXA1	annexin A1	Known	0.7492	0.9355	0.9772	0.9908	0.5	0.8919	0.9989	8	0	1	1	0	1	1	0	1	0.0234	Y	1	FALSE	TRUE
BRD-A84481105	thioridazine	acetylcholine receptor ligand|dopamine receptor|dopamine receptor antagonist|mucosa associated lymphoid tissue lymphoma translocation protein 1 (MALT1) inhibitor, DRD1|DRD2|HTR2A|ADRA1A|ADRA1B|CHRNA7|DRD5|HRH1|HTR1A|HTR2C|HTR6|HTR7|KCNH2|MALT1	3269	HRH1	histamine receptor H1	Known	0.7719	0.9315	0.9461	0.6489	0.5	0.5	0.9989	8	0	1	0	0	0	0	0	1	0.0168	Y	1	FALSE	TRUE
BRD-A93424738	dexamethasone	glucocorticoid receptor agonist|corticosteroid agonist|immunosuppressant, ANXA1|CYP3A4|CYP3A5|NOS2|NR0B1|NR3C1|NR3C2	866	SERPINA6	serpin family A member 6	StructureLikely	0.6722	0.9413	0.9672	0.8332	0.5	0.5	0.9989	5	0	1	0	0	1	0	0	0	0.0621	N	0	FALSE	TRUE
BRD-K00198051	zuclopenthixol	dopamine receptor antagonist, DRD2|DRD1|ADRA1A|ADRA2A|DRD5|HRH1|HTR2A	1128	CHRM1	cholinergic receptor muscarinic 1	StructureLikely	0.7303	0.9361	0.9574	0.8499	0.5	0.5	0.9989	5	0	1	0	0	1	0	0	0	0.0303	N	0	FALSE	TRUE
BRD-K00198051	zuclopenthixol	dopamine receptor antagonist, DRD2|DRD1|ADRA1A|ADRA2A|DRD5|HRH1|HTR2A	1812	DRD1	dopamine receptor D1	Known	0.6194	0.9451	0.9609	0.9908	0.5	0.5	0.9989	8	0	1	0	0	1	1	0	1	0.1101	Y	1	FALSE	TRUE
BRD-K00198051	zuclopenthixol	dopamine receptor antagonist, DRD2|DRD1|ADRA1A|ADRA2A|DRD5|HRH1|HTR2A	2568	GABRP	gamma-aminobutyric acid type A receptor subunit pi	pQSAR	0.83	0.9244	0.9244	0.3265	0.5	0.5	0.9989	2	1	1	0	0	0	0	0	0	0.0063	N	0	TRUE	FALSE
BRD-K00835182	dexamethasone	glucocorticoid receptor agonist|corticosteroid agonist|immunosuppressant, ANXA1|CYP3A4|CYP3A5|NOS2|NR0B1|NR3C1|NR3C2	2908	NR3C1	nuclear receptor subfamily 3 group C member 1	Known	0.738	0.9355	0.9769	0.9908	0.5	0.5	0.9989	8	0	1	0	0	1	1	0	1	0.0273	Y	1	FALSE	TRUE
BRD-K00835182	dexamethasone	glucocorticoid receptor agonist|corticosteroid agonist|immunosuppressant, ANXA1|CYP3A4|CYP3A5|NOS2|NR0B1|NR3C1|NR3C2	301	ANXA1	annexin A1	Known	0.7315	0.9355	0.9746	0.9908	0.5	0.5	0.9989	8	0	1	0	0	1	1	0	1	0.0298	Y	1	FALSE	TRUE
BRD-K03670461	tyrphostin-AG-82	EGFR inhibitor|epidermal growth factor receptor (EGFR) inhibitor|tyrosine kinase inhibitor, EGFR|LCK	506	ATP5F1B	ATP synthase F1 subunit beta	pQSAR	0.8137	0.9283	0.9283	0.3039	0.5	0.5	0.9989	2	1	1	0	0	0	0	0	0	0.0085	N	0	TRUE	FALSE
BRD-K06980535	promazine	dopamine receptor|dopamine receptor antagonist, CHRM5|DRD2|ADRA1A|ADRA1B|ADRA1D|CHRM1|CHRM2|CHRM3|CHRM4|DRD1|DRD3|DRD4|HRH1|HTR2A|HTR2C	1128	CHRM1	cholinergic receptor muscarinic 1	Known	0.4128	0.9572	0.9662	0.8939	0.5	0.5	0.9989	8	0	1	0	0	1	0	0	1	0.5452	Y	1	FALSE	TRUE
BRD-K10042277	desmethylclozapine	acetylcholine receptor agonist|dopamine receptor agonist|dopamine receptor antagonist|dopamine receptor partial agonist|serotonin receptor antagonist|serotonin receptor inverse agonist, CHRM1|DRD2|DRD3|HTR2A	1131	CHRM3	cholinergic receptor muscarinic 3	pIC50	0.7842	0.9299	0.9561	0.9176	0.5	0.5	0.9989	7	0	1	0	0	1	0	1	0	0.0139	N	0	FALSE	TRUE
BRD-K13027675	fluorometholone	corticosteroid agonist|glucocorticoid receptor agonist, NR3C1	2908	NR3C1	nuclear receptor subfamily 3 group C member 1	Known	0.6056	0.9449	0.9608	0.9908	0.5	0.8919	0.9989	8	0	1	1	0	1	1	1	1	0.1265	Y	1	FALSE	TRUE
BRD-K15108141	gemcitabine	cell cycle inhibitor|DNA repair enzyme inhibitor|DNA synthesis inhibitor|pyrimidine antagonist|ribonucleoside reductase inhibitor|ribonucleotide reductase inhibitor, RRM1|CMPK1|RRM2|TYMS	3091	HIF1A	hypoxia inducible factor 1 subunit alpha	pQSAR	0.8343	0.9234	0.9234	0.1186	0.5	0.5	0.9989	2	1	1	0	0	0	0	0	0	0.0058	N	0	TRUE	FALSE
BRD-K18194590	mephentermine	adrenergic receptor agonist, ADRA1A|ADRA1B|ADRA1D|ADRA2A|ADRA2B|ADRA2C|ADRB1|ADRB2|ADRB3	150	ADRA2A	adrenoceptor alpha 2A	Known	0.7419	0.9351	0.9351	0.9908	0.5	0.5	0.9989	8	0	1	0	0	1	1	0	1	0.0259	Y	1	FALSE	TRUE
BRD-K20285085	fostamatinib	syk inhibitor|FLT3 inhibitor, SYK|FLT3|RET	3716	JAK1	Janus kinase 1	pIC50	0.946	0.8942	0.8942	0.2716	0.5	0.5	0.9989	7	1	1	0	0	0	0	1	0	0.0002	N	0	TRUE	TRUE
BRD-K32610195	androstenedione	cytochrome P450 inhibitor, AKR1C3|HSD17B1|HSD3B1	2099	ESR1	estrogen receptor 1	pQSAR	0.8626	0.9199	0.9618	0.7908	0.5	0.5	0.9989	2	1	1	0	0	0	0	0	0	0.0032	N	0	TRUE	FALSE
BRD-K33106058	cytarabine	antimetabolite|DNA polymerase inhibitor|DNA synthesis inhibitor|ribonucleotide reductase inhibitor, POLB|POLA1	6241	RRM2	ribonucleotide reductase regulatory subunit M2	NCI60	0.7655	0.9334	0.9401	0.7806	0.5	0.8011	0.9989	3	0	1	1	0	0	0	0	0	0.0185	N	0	FALSE	TRUE
BRD-K39915878	loxapine	dopamine receptor antagonist|serotonin receptor antagonist|dopamine receptor ligand, DRD2|DRD3|DRD4|DRD1|HRH1|HTR2A|HTR2C|HTR6|ADRA1A|ADRA1B|ADRA2A|ADRA2B|ADRA2C|ADRB1|CHRM1|CHRM2|CHRM3|CHRM4|CHRM5|DRD5|HRH2|HRH4|HTR1A|HTR1B|HTR1D|HTR1E|HTR3A|HTR5A|HTR7|SLC6A2|SLC6A3|SLC6A4	3269	HRH1	histamine receptor H1	Known	0.5594	0.949	0.9611	0.9092	0.5	0.5	0.9989	8	0	1	0	0	1	0	1	1	0.195	Y	1	FALSE	TRUE
BRD-K41494493	bisphenol-a	synthetic compound with hormone-like properties, AR|ESR2|ESRRG|PPARG	2100	ESR2	estrogen receptor 2	Known	0.5455	0.9501	0.9501	0.5731	0.5	0.5	0.9989	8	0	1	0	0	0	0	0	1	0.22	Y	1	FALSE	TRUE
BRD-K42191735	buparlisib	PI3K inhibitor|protein kinase inhibitor, PIK3CA|PIK3CG	5290	PIK3CA	phosphatidylinositol-4,5-bisphosphate 3-kinase catalytic subunit alpha	Known	0.8428	0.9241	0.9241	0.3497	0.5	0.5	0.9989	8	1	1	0	0	0	0	1	1	0.0049	Y	1	TRUE	TRUE
BRD-K53737926	amitriptyline	norepinephrine inhibitor|serotonin receptor inhibitor|sigma receptor inhibitor, CHRM1|CHRM2|CHRM3|CHRM4|CHRM5|HRH1|HTR6|SLC6A2|SLC6A4|ADRA1A|ADRA1B|ADRA1D|ADRA2A|ADRB1|ADRB2|ADRB3|HRH2|HRH4|HTR1A|HTR1B|HTR1D|HTR2A|HTR2C|HTR7|KCNA1|KCND2|KCND3|KCNQ2|KCNQ3|NTRK1|NTRK2|OPRD1|OPRK1|OPRM1|SIGMAR1	152	ADRA2C	adrenoceptor alpha 2C	pIC50	0.5809	0.9481	0.9682	0.8273	0.5	0.5	0.9989	7	0	1	0	0	1	0	1	0	0.1605	N	0	FALSE	TRUE
BRD-K54759182	dosulepin	adrenergic transmitter uptake inhibitor|norepinephrine reuptake inhibitor|serotonin reuptake inhibitor|serotonin uptake inhibitor|tricyclic antidepressant, SLC6A2|SLC6A4|CHRM1|CHRM2|CHRM3|CHRM4|CHRM5|CYP2C19|HRH1	3269	HRH1	histamine receptor H1	Known	0.4604	0.9536	0.9682	0.8273	0.5	0.5	0.9989	8	0	1	0	0	1	0	0	1	0.4151	Y	1	FALSE	TRUE
BRD-K54759182	dosulepin	adrenergic transmitter uptake inhibitor|norepinephrine reuptake inhibitor|serotonin reuptake inhibitor|serotonin uptake inhibitor|tricyclic antidepressant, SLC6A2|SLC6A4|CHRM1|CHRM2|CHRM3|CHRM4|CHRM5|CYP2C19|HRH1	3358	HTR2C	5-hydroxytryptamine receptor 2C	StructureLikely	0.4808	0.9536	0.9682	0.8273	0.5	0.5	0.9989	5	0	1	0	0	1	0	0	0	0.3626	N	0	FALSE	TRUE
BRD-K55127134	fluphenazine	dopamine receptor antagonist|acetylcholine receptor ligand|dopamine receptor|histamine receptor antagonist|serotonin receptor antagonist, DRD2|DRD1|CALM1|CHRNA7|DRD5|HRH1|HTR2A|HTR6|HTR7	3269	HRH1	histamine receptor H1	Known	0.8408	0.923	0.9701	0.9092	0.5	0.5	0.9989	8	1	1	0	0	1	0	1	1	0.0051	Y	1	TRUE	TRUE
BRD-K59058766	chlorprothixene	dopamine receptor|dopamine receptor antagonist, DRD2|CHRM1|CHRM2|CHRM3|CHRM4|CHRM5|DRD1|DRD3|HRH1|HTR2A|HTR2B|HTR2C	1812	DRD1	dopamine receptor D1	Known	0.6186	0.9441	0.9766	0.9908	0.5	0.5	0.9989	8	0	1	0	0	1	1	0	1	0.1111	Y	1	FALSE	TRUE
BRD-K60640630	mometasone	glucocorticoid receptor agonist|immunosuppressant, NR3C1	866	SERPINA6	serpin family A member 6	StructureLikely	0.8221	0.9253	0.9584	0.824	0.5	0.5	0.9989	5	1	1	0	0	1	0	0	0	0.0073	N	0	TRUE	TRUE
BRD-K60762818	desipramine	norepinephrine transporter inhibitor|Sodium Channel Blockers|tricyclic antidepressant (TCA), SLC6A2|SLC6A4|ADRA1A|ADRA1B|ADRA1D|ADRA2A|ADRA2B|ADRA2C|ADRB1|ADRB2|CHRM1|CHRM2|CHRM3|CHRM4|CHRM5|DRD2|HRH1|HTR1A|HTR2A|HTR2C|SMPD1	152	ADRA2C	adrenoceptor alpha 2C	Known	0.6183	0.9449	0.9454	0.6079	0.5	0.5	0.9989	8	0	1	0	0	0	0	0	1	0.1114	Y	1	FALSE	TRUE
BRD-K63675182	triflupromazine	acetylcholine receptor ligand|dopamine receptor, HTR2B|CHRM1|CHRM2|CHRNA7|DRD1|DRD2	1812	DRD1	dopamine receptor D1	Known	0.6617	0.9428	0.9647	0.8603	0.5	0.5	0.9989	8	0	1	0	0	1	0	1	1	0.07	Y	1	FALSE	TRUE
BRD-K67174588	toremifene	selective estrogen receptor modulator (SERM)|estrogen receptor antagonist, ESR1|CYP3A5	3269	HRH1	histamine receptor H1	pQSAR	0.9168	0.9058	0.9058	0.5504	0.5	0.5	0.9989	2	1	1	0	0	0	0	0	0	0.0007	N	0	TRUE	FALSE
BRD-K74927006	cinnarizine	calcium ion channel antagonist|histamine receptor antagonist, HRH1|CACNA1C|CACNA1D|CACNA1F|CACNA1G|CACNA1H|CACNA1I|CACNA1S|CHRM1|CHRM2|CHRM3|CHRM4|CHRM5|DRD1|DRD2|DRD5	3269	HRH1	histamine receptor H1	Known	0.8613	0.9192	0.9654	0.9908	0.5	0.5	0.9989	8	1	1	0	0	1	1	1	1	0.0033	Y	1	TRUE	TRUE
BRD-K81091703	chlorprothixene	dopamine receptor|dopamine receptor antagonist, DRD2|CHRM1|CHRM2|CHRM3|CHRM4|CHRM5|DRD1|DRD3|HRH1|HTR2A|HTR2B|HTR2C	3358	HTR2C	5-hydroxytryptamine receptor 2C	Known	0.6046	0.9457	0.9766	0.9908	0.5	0.5	0.9989	8	0	1	0	0	1	1	0	1	0.1278	Y	1	FALSE	TRUE
BRD-K82481048	prednisolone	glucocorticoid receptor agonist, NR3C1|NR3C2|SERPINA6	190	NR0B1	nuclear receptor subfamily 0 group B member 1	NCI60	0.6602	0.9413	0.9413	0.5901	0.5	0.8096	0.9989	3	0	1	1	0	0	0	0	0	0.0712	N	0	FALSE	TRUE
BRD-K84709232	caffeic-acid	lipoxygenase inhibitor|HIV integrase inhibitor|NFkB pathway inhibitor|nitric oxide production inhibitor|PPAR receptor modulator|tumor necrosis factor production inhibitor, ALOX5|MIF|RELA|TNF	231	AKR1B1	aldo-keto reductase family 1 member B	pQSAR	0.884	0.915	0.915	0.468	0.5	0.5	0.9989	2	1	1	0	0	0	0	0	0	0.0019	N	0	TRUE	FALSE
BRD-K88741031	methyl-2,5-dihydroxycinnamate	EGFR inhibitor|tyrosine kinase inhibitor, EGFR	1956	EGFR	epidermal growth factor receptor	Known	0.8586	0.9199	0.9199	0.9908	0.5	0.5	0.9989	8	1	1	0	0	1	1	0	1	0.0035	Y	1	TRUE	TRUE
BRD-K96778649	tyrphostin-47	EGFR inhibitor|epidermal growth factor receptor (EGFR) inhibitor, EGFR	23411	SIRT1	sirtuin 1	NCI60	0.5344	0.9505	0.9505	0.5236	0.5	0.8031	0.9989	3	0	1	1	0	0	0	0	0	0.2414	N	0	FALSE	TRUE
BRD-K97810537	beclometasone	glucocorticoid receptor agonist|corticosteroid hormone receptor agonist|immunosuppressant, NR3C1|CYP3A5|GPR97|SERPINA6	866	SERPINA6	serpin family A member 6	Known	0.697	0.9384	0.9762	0.9908	0.5	0.5	0.9989	8	0	1	0	0	1	1	0	1	0.0463	Y	1	FALSE	TRUE
BRD-K98521173	desoxycortone	mineralocorticoid receptor agonist, NR3C1|NR3C2	2099	ESR1	estrogen receptor 1	StructureLikely	0.77	0.9335	0.97	0.8673	0.5	0.5	0.9989	5	0	1	0	0	1	0	0	0	0.0173	N	0	FALSE	TRUE
BRD-K99107520	felbamate	carbonic anhydrase inhibitor|GABA receptor modulator|glutamate receptor blocker, GRIN2A|GRIN2B|GRIN3A	1786	DNMT1	DNA methyltransferase 1	pQSAR	0.8976	0.9133	0.9133	0.1773	0.5	0.5	0.9989	2	1	1	0	0	0	0	0	0	0.0013	N	0	TRUE	FALSE
BRD-K99545815	PF-562271	focal adhesion kinase inhibitor|angiogenesis inhibitor|apoptosis stimulant, PTK2|PTK2B	983	CDK1	cyclin dependent kinase 1	pIC50	0.8927	0.913	0.913	0.2823	0.5	0.5	0.9989	7	1	1	0	0	0	0	1	0	0.0015	N	0	TRUE	TRUE
BRD-A01346607	flumetasone	glucocorticoid receptor agonist, NR3C1|PLA2G1B	1577	CYP3A5	cytochrome P450 family 3 subfamily A member 5	StructureLikely	0.7276	0.9342	0.9697	0.9062	0.5	0.7892	0.9988	5	0	1	0	0	1	0	0	0	0.0314	N	0	FALSE	TRUE
BRD-A01346607	flumetasone	glucocorticoid receptor agonist, NR3C1|PLA2G1B	301	ANXA1	annexin A1	StructureLikely	0.7298	0.9346	0.9697	0.9062	0.5	0.7892	0.9988	5	0	1	0	0	1	0	0	0	0.0305	N	0	FALSE	TRUE
BRD-A02180903	betamethasone	corticosteroid agonist|glucocorticoid receptor agonist, NR3C1	301	ANXA1	annexin A1	StructureSure	0.7055	0.9371	0.9767	0.9908	0.5	0.8919	0.9988	6	0	1	1	0	1	1	0	0	0.0417	N	0	FALSE	TRUE
BRD-A07000685	hydrocortisone	corticosteroid agonist|glucocorticoid receptor agonist|immunosuppressant|interleukin receptor antagonist, ANXA1|NOS2|NR3C1|NR3C2	866	SERPINA6	serpin family A member 6	StructureLikely	0.7856	0.928	0.9687	0.8499	0.5	0.5	0.9988	5	0	1	0	0	1	0	0	0	0.0136	N	0	FALSE	TRUE
BRD-A09539288	homatropine	acetylcholine receptor antagonist, CES1|CHRM1	3269	HRH1	histamine receptor H1	pQSAR	0.913	0.9042	0.9042	0.7406	0.5	0.5	0.9988	2	1	1	0	0	0	0	0	0	0.0008	N	0	TRUE	FALSE
BRD-A19661776	mianserin	serotonin receptor antagonist|tetracyclic antidepressant, HTR2A|HTR2C|ADRA1A|ADRA1B|ADRA1D|HRH1|HTR2B|HTR6|HTR7|ADRA2A|ADRA2B|ADRA2C|DRD1|DRD2|DRD3|DRD5|HRH2|HRH4|HTR1A|HTR1F|OPRK1|SLC6A2|SLC6A3|SLC6A4	152	ADRA2C	adrenoceptor alpha 2C	Known	0.5242	0.949	0.949	0.814	0.5	0.5	0.9988	8	0	1	0	0	1	0	1	1	0.2624	Y	1	FALSE	TRUE
BRD-A25143711	hydrocortisone	corticosteroid agonist|glucocorticoid receptor agonist|immunosuppressant|interleukin receptor antagonist, ANXA1|NOS2|NR3C1|NR3C2	6608	SMO	smoothened, frizzled class receptor	pQSAR	0.9062	0.9055	0.9055	0.1692	0.5	0.5	0.9988	2	1	1	0	0	0	0	0	0	0.001	N	0	TRUE	FALSE
BRD-A29082194	gitoxigenin	ATPase inhibitor, ATP1A1	476	ATP1A1	ATPase Na+/K+ transporting subunit alpha 1	Known	0.8502	0.9199	0.9685	0.8769	0.5	0.8271	0.9988	8	1	1	1	0	1	0	0	1	0.0042	Y	1	TRUE	TRUE
BRD-A31159102	fluoxetine	selective serotonin reuptake inhibitor (SSRI)|serotonin transporter (SERT) inhibitor|serotonin uptake inhibitor|Sodium Channel Blockers, SLC6A4|ANO1|CYP2C19|HTR2B	1128	CHRM1	cholinergic receptor muscarinic 1	pQSAR	0.8343	0.9213	0.9213	0.4398	0.5	0.5	0.9988	2	1	1	0	0	0	0	0	0	0.0058	N	0	TRUE	FALSE
BRD-A35588707	teniposide	topoisomerase inhibitor|DNA inhibitor|DNA repair enzyme inhibitor|mitotic inhibitor, TOP2A|CYP3A5	7153	TOP2A	DNA topoisomerase II alpha	Known	0.9003	0.9092	0.9713	0.8734	0.5	0.8745	0.9988	8	1	1	1	0	1	0	0	1	0.0012	Y	1	TRUE	TRUE
BRD-A43974575	tranylcypromine	cytochrome P450 inhibitor|histone lysine demethylase inhibitor|monoamine oxidase inhibitor, MAOA|MAOB|KDM1A|CYP2A6	1131	CHRM3	cholinergic receptor muscarinic 3	pQSAR	0.8537	0.9183	0.9183	0.2931	0.5	0.5	0.9988	2	1	1	0	0	0	0	0	0	0.0039	N	0	TRUE	FALSE
BRD-A50928468	norgestrel	progesterone receptor agonist, CYP2E1|PGR	2539	G6PD	glucose-6-phosphate dehydrogenase	pQSAR	0.8783	0.9134	0.9134	0.2204	0.5	0.5	0.9988	2	1	1	0	0	0	0	0	0	0.0022	N	0	TRUE	FALSE
BRD-A56245458	reichstein	androgen receptor antagonist, AR	1577	CYP3A5	cytochrome P450 family 3 subfamily A member 5	pQSAR	0.8459	0.9193	0.9567	0.7435	0.5	0.5	0.9988	2	1	1	0	0	0	0	0	0	0.0046	N	0	TRUE	FALSE
BRD-A56592690	PX-12	thioredoxin inhibitor|thioredoxin reductase inhibitor|apoptosis stimulant|tubulin polymerisation inhibitor, TXN|TXNRD1|TXNRD2	3615	IMPDH2	inosine monophosphate dehydrogenase 2	pQSAR	0.886	0.9126	0.9126	0.1419	0.5	0.5	0.9988	2	1	1	0	0	0	0	0	0	0.0018	N	0	TRUE	FALSE
BRD-A62428732	hydroxyzine	histamine receptor antagonist, HRH1	1131	CHRM3	cholinergic receptor muscarinic 3	pQSAR	0.8469	0.9205	0.9297	0.5947	0.5	0.5	0.9988	2	1	1	0	0	0	0	0	0	0.0045	N	0	TRUE	FALSE
BRD-A91555231	norepinephrine	adrenergic receptor agonist|DNA inhibitor|free radical scavenger, ADRA1A|ADRA1B|ADRA1D|ADRA2A|ADRA2B|ADRA2C|ADRB1|ADRB3|ADRB2|DRD1|DRD5|PAH|SLC18A1|SLC18A2	154	ADRB2	adrenoceptor beta 2	Known	0.8043	0.9264	0.9766	0.9908	0.5	0.5	0.9988	8	1	1	0	0	1	1	0	1	0.01	Y	1	TRUE	TRUE
BRD-A92537424	danazol	estrogen receptor antagonist|luteinizing hormone releasing hormone antagonist|progesterone receptor agonist|steroid derivative with antigonadotropic and anti-estrogenic activities|tumor necrosis factor modulator, ESR1|GNRHR|AR|CCL2|CYP2C8|GNRHR2|PGR|TNF	2099	ESR1	estrogen receptor 1	Known	0.8525	0.9191	0.9765	0.9908	0.5	0.5	0.9988	8	1	1	0	0	1	1	0	1	0.004	Y	1	TRUE	TRUE
BRD-A93424738	dexamethasone	glucocorticoid receptor agonist|corticosteroid agonist|immunosuppressant, ANXA1|CYP3A4|CYP3A5|NOS2|NR0B1|NR3C1|NR3C2	301	ANXA1	annexin A1	Known	0.7354	0.9329	0.977	0.9908	0.5	0.5	0.9988	8	0	1	0	0	1	1	0	1	0.0283	Y	1	FALSE	TRUE
BRD-A97104540	fenoterol	adrenergic receptor agonist, ADRB2|ADRB1|ADRB3	154	ADRB2	adrenoceptor beta 2	Known	0.7486	0.9323	0.9536	0.7724	0.5	0.5	0.9988	8	0	1	0	0	0	0	1	1	0.0236	Y	1	FALSE	TRUE
BRD-K01188359	vinblastine	microtubule formation inhibitor|tubulin inhibitor|tubulin polymerisation inhibitor, TUBB|JUN|TUBA1A|TUBD1|TUBE1|TUBG1	3326	HSP90AB1	heat shock protein 90 alpha family class B member 1	pQSAR	0.8389	0.9213	0.9213	0.1338	0.5	0.5	0.9988	2	1	1	0	0	0	0	0	0	0.0053	N	0	TRUE	FALSE
BRD-K02265150	amoxapine	adrenergic transmitter uptake inhibitor|dopamine receptor|norepinephrine reputake inhibitor|serotonin receptor antagonist|serotonin reuptake inhibitor|serotonin uptake inhibitor|tricyclic antidepressant, SLC6A2|SLC6A4|HTR2A|HTR6|ADRA1A|ADRA1B|ADRA1D|ADRA2A|ADRA2B|ADRA2C|CHRM1|CHRM2|CHRM3|CHRM4|CHRM5|DRD1|DRD2|DRD3|DRD4|GABRA1|GABRA2|GABRA3|GABRA4|GABRA5|GABRA6|GABRB1|GABRB2|GABRB3|GABRD|GABRE|GAB…	1577	CYP3A5	cytochrome P450 family 3 subfamily A member 5	pQSAR	0.8715	0.9163	0.9163	0.4165	0.5	0.5	0.9988	2	1	1	0	0	0	0	0	0	0.0026	N	0	TRUE	FALSE
BRD-K10995081	perphenazine	dopamine receptor|dopamine receptor antagonist, DRD2|CALM1|DRD1|HRH1|HTR2A|HTR2C|HTR6|HTR7	150	ADRA2A	adrenoceptor alpha 2A	StructureLikely	0.6663	0.94	0.9609	0.824	0.5	0.5	0.9988	5	0	1	0	0	1	0	0	0	0.0665	N	0	FALSE	TRUE
BRD-K14177560	ethynodiol	steroidal progestin, PGR|ESR1	2099	ESR1	estrogen receptor 1	Known	0.8221	0.9244	0.9355	0.729	0.5	0.5	0.9988	8	1	1	0	0	0	0	0	1	0.0073	Y	1	TRUE	TRUE
BRD-K17041687	diflorasone	corticosteroid agonist|cytochrome P450 inhibitor|glucocorticoid receptor agonist|immunosuppressant, NR3C1|PLA2G1B	866	SERPINA6	serpin family A member 6	StructureLikely	0.6302	0.9429	0.9671	0.8939	0.5	0.5	0.9988	5	0	1	0	0	1	0	0	0	0.0985	N	0	FALSE	TRUE
BRD-K18895904	olanzapine	dopamine receptor antagonist|serotonin receptor antagonist, DRD2|HTR2A|HTR2C|DRD1|DRD3|DRD4|HRH1|HTR1A|HTR1B|HTR1D|HTR1E|HTR6|HTR7|ADRA1A|ADRA1B|ADRA2A|ADRA2B|ADRA2C|ADRB1|ADRB2|ADRB3|CHRM1|CHRM2|CHRM3|CHRM4|CHRM5|CYP2C8|DRD5|GABRA1|GABRA2|GABRA3|GABRA4|GABRA5|GABRA6|GABRB1|GABRB2|GABRB3|GABRD|GABRE|GABRG1|GABRG2|GABRG3|GABRP|GABRQ|HRH2|HRH4|HTR1F|HTR2B|HTR3A|HTR5A	154	ADRB2	adrenoceptor beta 2	Known	0.8284	0.9226	0.9226	0.1881	0.5	0.5	0.9988	8	1	1	0	0	0	0	0	1	0.0065	Y	1	TRUE	TRUE
BRD-K22947005	dexbrompheniramine	histamine receptor antagonist, HRH1	3269	HRH1	histamine receptor H1	Known	0.7976	0.927	0.9756	0.9908	0.5	0.5	0.9988	8	0	1	0	0	1	1	1	1	0.0112	Y	1	FALSE	TRUE
BRD-K23714869	triamcinolone	antiinflammatory agent|corticosteroid agonist|corticosteroid binding globulin binder|corticosteroid hormone receptor agonist|cytochrome P450 inhibitor|glucocorticoid receptor agonist|immunosuppressant|immunosuppressive agent, NR3C1|CYP3A5|CYP3A7|SERPINA6	866	SERPINA6	serpin family A member 6	Known	0.8586	0.9186	0.9769	0.9908	0.5	0.5	0.9988	8	1	1	0	0	1	1	0	1	0.0035	Y	1	TRUE	TRUE
BRD-K27218697	rimexolone	glucocorticoid receptor agonist|immunosuppressant|mineralocorticoid receptor agonist, NR3C1|SERPINA6	2908	NR3C1	nuclear receptor subfamily 3 group C member 1	Known	0.4678	0.9519	0.9646	0.9908	0.5	0.5	0.9988	8	0	1	0	0	1	1	1	1	0.3958	Y	1	FALSE	TRUE
BRD-K29173907	isoflupredone	glucocorticoid receptor agonist, NR3C1	301	ANXA1	annexin A1	StructureLikely	0.7486	0.9323	0.9694	0.8699	0.5	0.5	0.9988	5	0	1	0	0	1	0	0	0	0.0236	N	0	FALSE	TRUE
BRD-K33396764	alpha-linolenic-acid	omega-3 fatty acid, ELOVL4|FADS1|FADS2|FFAR1|FFAR4|PTGS2|SLC8A1|TRPV1	5468	PPARG	peroxisome proliferator activated receptor gamma	StructureSure	0.5292	0.9491	0.9728	0.9728	0.5	0.5	0.9988	6	0	1	0	0	1	1	0	0	0.2519	N	0	FALSE	TRUE
BRD-K37289225	clozapine	serotonin receptor antagonist|dopamine receptor antagonist|adrenergic receptor antagonist, DRD2|DRD4|ADRA1A|ADRA1B|CHRM1|DRD1|DRD3|HRH1|HRH4|HTR1A|HTR1B|HTR1D|HTR1E|HTR2A|HTR2C|HTR6|HTR7|ADRA1D|ADRA2A|ADRA2B|ADRA2C|CALY|CHRM2|CHRM3|CHRM4|CHRM5|CYP2C19|DRD5|HTR1F|HTR2B|HTR3A|HTR5A	1131	CHRM3	cholinergic receptor muscarinic 3	Known	0.6972	0.9376	0.9611	0.7778	0.5	0.5	0.9988	8	0	1	0	0	0	0	1	1	0.0462	Y	1	FALSE	TRUE
BRD-K38436528	imipramine	norepinephrine reputake inhibitor|serotonin reuptake inhibitor|Sodium Channel Blockers, SLC6A2|SLC6A4|CHRM2|ADRA1A|ADRA1B|ADRA1D|CHRM1|CHRM3|CHRM4|CHRM5|CYP2C19|DRD1|DRD2|DRD5|HRH1|HTR1A|HTR2A|HTR2C|HTR6|HTR7|KCND2|KCND3|KCNH1|KCNH2|SLC6A3	1128	CHRM1	cholinergic receptor muscarinic 1	Known	0.4814	0.9512	0.9662	0.7833	0.5	0.5	0.9988	8	0	1	0	0	0	0	1	1	0.361	Y	1	FALSE	TRUE
BRD-K39915878	loxapine	dopamine receptor antagonist|serotonin receptor antagonist|dopamine receptor ligand, DRD2|DRD3|DRD4|DRD1|HRH1|HTR2A|HTR2C|HTR6|ADRA1A|ADRA1B|ADRA2A|ADRA2B|ADRA2C|ADRB1|CHRM1|CHRM2|CHRM3|CHRM4|CHRM5|DRD5|HRH2|HRH4|HTR1A|HTR1B|HTR1D|HTR1E|HTR3A|HTR5A|HTR7|SLC6A2|SLC6A3|SLC6A4	1812	DRD1	dopamine receptor D1	Known	0.5275	0.949	0.9611	0.9092	0.5	0.5	0.9988	8	0	1	0	0	1	0	1	1	0.2554	Y	1	FALSE	TRUE
BRD-K41524689	paracetamol	cyclooxygenase inhibitor, PTGS1|PTGS2|CYP2E1	367	AR	androgen receptor	pQSAR	0.9168	0.9032	0.9032	0.4752	0.5	0.5	0.9988	2	1	1	0	0	0	0	0	0	0.0007	N	0	TRUE	FALSE
BRD-K52989797	clomipramine	serotonin transporter (SERT) inhibitor|dopamine transporter (DAT) inhibitor|norepinephrine transporter (NET) inhibitor, SLC6A4|SLC6A2|CYP2C19|GSTP1|HTR2A|HTR2B|HTR2C|SLC6A3	1131	CHRM3	cholinergic receptor muscarinic 3	StructureLikely	0.4558	0.9524	0.9625	0.8734	0.5	0.5	0.9988	5	0	1	0	0	1	0	0	0	0.4275	N	0	FALSE	TRUE
BRD-K58746048	flurandrenolide	glucocorticoid receptor agonist., NR3C1|SERPINA6	2554	GABRA1	gamma-aminobutyric acid type A receptor subunit alpha1	pQSAR	0.9378	0.8947	0.8947	0.1217	0.5	0.5	0.9988	2	1	1	0	0	0	0	0	0	0.0003	N	0	TRUE	FALSE
BRD-K62310379	fluticasone	glucocorticoid receptor agonist, NR3C1|CYP3A5|CYP3A7|NR3C2|PGR|PLA2G4A	301	ANXA1	annexin A1	pQSAR	0.8086	0.926	0.9478	0.6447	0.5	0.5	0.9988	2	1	1	0	0	0	0	0	0	0.0093	N	0	TRUE	FALSE
BRD-K62737565	gabapentin	calcium channel antagonist|voltage-gated calcium channel ligand, CACNA2D1|CACNA2D2|ADORA1|CACNA1B|GRIN1|GRIN2A|GRIN2B|GRIN2C|GRIN2D|GRIN3A|GRIN3B	5743	PTGS2	prostaglandin-endoperoxide synthase 2	pQSAR	0.8086	0.925	0.925	0.3039	0.5	0.5	0.9988	2	1	1	0	0	0	0	0	0	0.0093	N	0	TRUE	FALSE
BRD-K68804560	benzatropine	anticholinergic, CHRM1|HRH1|SLC6A3	1128	CHRM1	cholinergic receptor muscarinic 1	Known	0.71	0.9367	0.9747	0.9908	0.5	0.5	0.9988	8	0	1	0	0	1	1	1	1	0.0394	Y	1	FALSE	TRUE
BRD-K70792160	10-DEBC	AKT inhibitor|Pim kinase inhibitor, PIM1	116443	GRIN3A	glutamate ionotropic receptor NMDA type subunit 3A	pQSAR	0.8334	0.9228	0.9228	0.373	0.5	0.5	0.9988	2	1	1	0	0	0	0	0	0	0.0059	N	0	TRUE	FALSE
BRD-K77947974	fluspirilene	dopamine receptor|dopamine receptor antagonist, DRD2|HTR2A|CACNG1|HRH1|HTR1A|HTR1D|HTR1E	1577	CYP3A5	cytochrome P450 family 3 subfamily A member 5	pQSAR	0.8684	0.916	0.916	0.2608	0.5	0.7065	0.9988	2	1	1	0	0	0	0	0	0	0.0028	N	0	TRUE	FALSE
BRD-K80267133	aminosalicylic-acid	cyclooxygenase inhibitor, PTGS2|ALOX5|CHUK|PLA2G2E|PTGS1	1644	DDC	dopa decarboxylase	pQSAR	0.8599	0.9168	0.9168	0.4165	0.5	0.5	0.9988	2	1	1	0	0	0	0	0	0	0.0034	N	0	TRUE	FALSE
BRD-K81091703	chlorprothixene	dopamine receptor|dopamine receptor antagonist, DRD2|CHRM1|CHRM2|CHRM3|CHRM4|CHRM5|DRD1|DRD3|HRH1|HTR2A|HTR2B|HTR2C	1812	DRD1	dopamine receptor D1	Known	0.635	0.9417	0.9766	0.9908	0.5	0.5	0.9988	8	0	1	0	0	1	1	1	1	0.0937	Y	1	FALSE	TRUE
BRD-K88741031	methyl-2,5-dihydroxycinnamate	EGFR inhibitor|tyrosine kinase inhibitor, EGFR	2538	G6PC1	glucose-6-phosphatase catalytic subunit 1	pQSAR	0.8537	0.9183	0.9183	0.538	0.5	0.5	0.9988	2	1	1	0	0	0	0	0	0	0.0039	N	0	TRUE	FALSE
BRD-K89014967	AS-703026	MEK inhibitor, MAP2K1|MAP2K2	5605	MAP2K2	mitogen-activated protein kinase kinase 2	Known	0.8361	0.9219	0.9219	0.7128	0.5	0.5	0.9988	8	1	1	0	0	0	0	0	1	0.0056	Y	1	TRUE	TRUE
BRD-K90543092	levonorgestrel	estrogen receptor agonist|glucocorticoid receptor antagonist|progesterone receptor agonist|progesterone receptor antagonist, PGR|AR|CYP2E1|ESR1|SRD5A1	2099	ESR1	estrogen receptor 1	Known	0.7217	0.9347	0.977	0.9908	0.5	0.5	0.9988	8	0	1	0	0	1	1	0	1	0.0339	Y	1	FALSE	TRUE
BRD-K99545815	PF-562271	focal adhesion kinase inhibitor|angiogenesis inhibitor|apoptosis stimulant, PTK2|PTK2B	6850	SYK	spleen associated tyrosine kinase	pQSAR	0.8137	0.9246	0.9246	0.2608	0.5	0.5	0.9988	2	1	1	0	0	0	0	0	0	0.0085	N	0	TRUE	FALSE
BRD-A06352418	terfenadine	histamine receptor antagonist, HRH1|KCNH2|CHRM1|CHRM2|CHRM3|CHRM4|CHRM5|KCNH1	1812	DRD1	dopamine receptor D1	pQSAR	0.8613	0.9145	0.9145	0.3497	0.5	0.5	0.9987	2	1	1	0	0	0	0	0	0	0.0033	N	0	TRUE	FALSE
BRD-A29644307	nomifensine	norepinephrine-dopamine reuptake inhibitor, SLC6A2|SLC6A3|DRD2|MAOA|MAOB|MPO	3358	HTR2C	5-hydroxytryptamine receptor 2C	pQSAR	0.9095	0.9023	0.9097	0.581	0.5	0.5	0.9987	2	1	1	0	0	0	0	0	0	0.0009	N	0	TRUE	FALSE
BRD-A39290993	cyproterone	androgen receptor antagonist|DNA directed DNA polymerase stimunlant|Estradiol 17 beta dehydrogenase stimulant|estrone sulfotransferase stimulant|progesterone receptor agonist|testosterone receptor antagonist, AR|ADORA1|ESR1	866	SERPINA6	serpin family A member 6	pQSAR	0.8699	0.913	0.913	0.2716	0.5	0.5	0.9987	2	1	1	0	0	0	0	0	0	0.0027	N	0	TRUE	FALSE
BRD-A48720949	testosterone	androgen receptor (AR) agonist|androgen receptor agonist|testosterone receptor agonist, AR|CYP19A1|CYP2C19|CYP2C8|CYP3A5	367	AR	androgen receptor	Known	0.8199	0.9218	0.9769	0.9908	0.5	0.5	0.9987	8	1	1	0	0	1	1	0	1	0.0076	Y	1	TRUE	TRUE
BRD-A53576514	orphenadrine	acetylcholine receptor antagonist, CYP2B6|GRIN1|GRIN2D|GRIN3A|GRIN3B|HRH1|SCN10A|SLC6A2	3269	HRH1	histamine receptor H1	Known	0.6309	0.9407	0.9683	0.8603	0.5	0.5	0.9987	8	0	1	0	0	1	0	0	1	0.0978	Y	1	FALSE	TRUE
BRD-A64092382	mexiletine	sodium channel blocker|potassium channel blocker, SCN5A|AHR|CYP2B6|CYP2E1|KCNK2|KCNK3|SCN4A	476	ATP1A1	ATPase Na+/K+ transporting subunit alpha 1	pQSAR	0.946	0.8882	0.8882	0.1773	0.5	0.5	0.9987	2	1	1	0	0	0	0	0	0	0.0002	N	0	TRUE	FALSE
BRD-A75172220	hydrocortisone	corticosteroid agonist|glucocorticoid receptor agonist|immunosuppressant|interleukin receptor antagonist, ANXA1|NOS2|NR3C1|NR3C2	1577	CYP3A5	cytochrome P450 family 3 subfamily A member 5	NCI60	0.5374	0.9459	0.9459	0.6782	0.5	0.8862	0.9987	3	0	1	1	0	0	0	0	0	0.2355	N	0	FALSE	TRUE
BRD-A75172220	hydrocortisone	corticosteroid agonist|glucocorticoid receptor agonist|immunosuppressant|interleukin receptor antagonist, ANXA1|NOS2|NR3C1|NR3C2	775	CACNA1C	calcium voltage-gated channel subunit alpha1 C	pQSAR	0.8171	0.9233	0.9233	0.5021	0.5	0.5	0.9987	2	1	1	0	0	0	0	0	0	0.008	N	0	TRUE	FALSE
BRD-A91008255	bepridil	calcium channel blocker|L-type calcium channel blocker, ATP1A1|CACNA1A|CACNA1C|CACNA1H|CACNA2D2|CALM1|KCNQ1|KCNQ4|PDE1A|PDE1B|SCN5A|TNNC1	3269	HRH1	histamine receptor H1	pQSAR	0.8801	0.91	0.91	0.468	0.5	0.5	0.9987	2	1	1	0	0	0	0	0	0	0.0021	N	0	TRUE	FALSE
BRD-A98431941	ephedrine	adrenergic receptor agonist, ACHE|ADRA1A|ADRB2|SLC18A2|SLC6A2	4128	MAOA	monoamine oxidase A	pQSAR	0.83	0.9194	0.9194	0.3039	0.5	0.5	0.9987	2	1	1	0	0	0	0	0	0	0.0063	N	0	TRUE	FALSE
BRD-K01014769	isoflupredone	glucocorticoid receptor agonist, NR3C1	2908	NR3C1	nuclear receptor subfamily 3 group C member 1	Known	0.5689	0.9453	0.9694	0.9908	0.5	0.5	0.9987	8	0	1	0	0	1	1	0	1	0.1791	Y	1	FALSE	TRUE
BRD-K01014769	isoflupredone	glucocorticoid receptor agonist, NR3C1	301	ANXA1	annexin A1	StructureLikely	0.7341	0.9323	0.9694	0.8699	0.5	0.5	0.9987	5	0	1	0	0	1	0	0	0	0.0288	N	0	FALSE	TRUE
BRD-K01192156	tyrphostin-AG-112	protein tyrosine kinase inhibitor, EGFR	1956	EGFR	epidermal growth factor receptor	Known	0.8268	0.9218	0.937	0.629	0.5	0.5	0.9987	8	1	1	0	0	0	0	0	1	0.0067	Y	1	TRUE	TRUE
BRD-K13027675	fluorometholone	corticosteroid agonist|glucocorticoid receptor agonist, NR3C1	1577	CYP3A5	cytochrome P450 family 3 subfamily A member 5	NCI60	0.5873	0.9442	0.9567	0.6808	0.5	0.8236	0.9987	3	0	1	1	0	0	0	0	0	0.151	N	0	FALSE	TRUE
BRD-K13688115	medrysone	corticosteroid hormone receptor agonist|glucocorticoid receptor agonist, NR3C1	190	NR0B1	nuclear receptor subfamily 0 group B member 1	pQSAR	0.8491	0.9175	0.9175	0.2312	0.5	0.5	0.9987	2	1	1	0	0	0	0	0	0	0.0043	N	0	TRUE	FALSE
BRD-K14618467	IKK-16	IKK inhibitor, IKBKB	1017	CDK2	cyclin dependent kinase 2	pQSAR	0.8599	0.9147	0.9147	0.4824	0.5	0.5	0.9987	2	1	1	0	0	0	0	0	0	0.0034	N	0	TRUE	FALSE
BRD-K15108141	gemcitabine	cell cycle inhibitor|DNA repair enzyme inhibitor|DNA synthesis inhibitor|pyrimidine antagonist|ribonucleoside reductase inhibitor|ribonucleotide reductase inhibitor, RRM1|CMPK1|RRM2|TYMS	7153	TOP2A	DNA topoisomerase II alpha	pQSAR	0.9259	0.8964	0.8964	0.1773	0.5	0.5	0.9987	2	1	1	0	0	0	0	0	0	0.0005	N	0	TRUE	FALSE
BRD-K17743125	belinostat	HDAC inhibitor|cell cycle inhibitor, HDAC1|HDAC2|HDAC3|HDAC4|HDAC5|HDAC6|HDAC7|HDAC8|HDAC9	10014	HDAC5	histone deacetylase 5	Known	0.7673	0.9289	0.9289	0.5236	0.5	0.7576	0.9987	8	0	1	0	0	0	0	0	1	0.018	Y	1	FALSE	TRUE
BRD-K17743125	belinostat	HDAC inhibitor|cell cycle inhibitor, HDAC1|HDAC2|HDAC3|HDAC4|HDAC5|HDAC6|HDAC7|HDAC8|HDAC9	55869	HDAC8	histone deacetylase 8	Known	0.7727	0.9289	0.9289	0.5549	0.5	0.7576	0.9987	8	0	1	0	0	0	0	1	1	0.0166	Y	1	FALSE	TRUE
BRD-K18895904	olanzapine	dopamine receptor antagonist|serotonin receptor antagonist, DRD2|HTR2A|HTR2C|DRD1|DRD3|DRD4|HRH1|HTR1A|HTR1B|HTR1D|HTR1E|HTR6|HTR7|ADRA1A|ADRA1B|ADRA2A|ADRA2B|ADRA2C|ADRB1|ADRB2|ADRB3|CHRM1|CHRM2|CHRM3|CHRM4|CHRM5|CYP2C8|DRD5|GABRA1|GABRA2|GABRA3|GABRA4|GABRA5|GABRA6|GABRB1|GABRB2|GABRB3|GABRD|GABRE|GABRG1|GABRG2|GABRG3|GABRP|GABRQ|HRH2|HRH4|HTR1F|HTR2B|HTR3A|HTR5A	1131	CHRM3	cholinergic receptor muscarinic 3	Known	0.5517	0.9458	0.9557	0.5685	0.5	0.5	0.9987	8	0	1	0	0	0	0	0	1	0.2087	Y	1	FALSE	TRUE
BRD-K22936972	diphenylpyraline	dopamine reuptake inhibitor|histamine receptor antagonist, HRH1|SLC6A3	775	CACNA1C	calcium voltage-gated channel subunit alpha1 C	pQSAR	0.8561	0.9163	0.9163	0.373	0.5	0.5	0.9987	2	1	1	0	0	0	0	0	0	0.0037	N	0	TRUE	FALSE
BRD-K28143534	cyproheptadine	histamine receptor antagonist|serotonin receptor antagonist, HRH1|ADRA1A|ADRA1B|ADRA1D|CHRM1|CHRM2|CHRM3|HTR2A|HTR2B|HTR2C|HTR6|HTR7	1131	CHRM3	cholinergic receptor muscarinic 3	Known	0.648	0.9392	0.9392	0.4967	0.5	0.5	0.9987	8	0	1	0	0	0	0	0	1	0.0815	Y	1	FALSE	TRUE
BRD-K28542495	benzydamine	membrane integrity inhibitor|prostanoid receptor inhibitor, PRSS1|PRSS2	5292	PIM1	Pim-1 proto-oncogene, serine/threonine kinase	pQSAR	0.8783	0.911	0.911	0.4165	0.5	0.5	0.9987	2	1	1	0	0	0	0	0	0	0.0022	N	0	TRUE	FALSE
BRD-K28849549	mesalazine	cyclooxygenase inhibitor|arylamine N-acetyltransferase inhibitor|beta catenin inhibitor|lipoxygenase inhibitor|prostanoid receptor inhibitor|protein phosphatase inhibitor|thromboxane receptor antagonist|thromboxane synthase inhibitor, PTGS1|PPARG|PTGS2|ALOX5|CHUK|CTNNB1|IKBKB|MPO|NAT1	1644	DDC	dopa decarboxylase	pQSAR	0.8502	0.9179	0.9179	0.4895	0.5	0.5	0.9987	2	1	1	0	0	0	0	0	0	0.0042	N	0	TRUE	FALSE
BRD-K29173907	isoflupredone	glucocorticoid receptor agonist, NR3C1	1577	CYP3A5	cytochrome P450 family 3 subfamily A member 5	StructureLikely	0.884	0.9091	0.9694	0.8699	0.5	0.5	0.9987	5	1	1	0	0	1	0	0	0	0.0019	N	0	TRUE	TRUE
BRD-K29582115	ziprasidone	dopamine receptor antagonist|serotonin receptor antagonist|norepinephrine reuptake inhibitor|serotonin receptor agonist|serotonin reuptake inhibitor, DRD2|HTR2A|HTR1A|HTR1D|HRH1|HTR1B|HTR1E|HTR2C|HTR7|ADRA1A|ADRA1B|ADRA2A|ADRA2B|ADRA2C|CHRM1|CHRM2|CHRM3|CHRM4|CHRM5|DRD1|DRD3|DRD4|DRD5|HTR3A|HTR6|SLC6A4	3269	HRH1	histamine receptor H1	Known	0.7486	0.9311	0.9311	0.4967	0.5	0.5	0.9987	8	0	1	0	0	0	0	0	1	0.0236	Y	1	FALSE	TRUE
BRD-K30240666	clemastine	histamine receptor antagonist, HRH1	3269	HRH1	histamine receptor H1	Known	0.6961	0.9351	0.9351	0.5856	0.5	0.5	0.9987	8	0	1	0	0	0	0	1	1	0.0468	Y	1	FALSE	TRUE
BRD-K32696739	noreleagnine	imidazoline receptor ligand|serotonin receptor ligand, ADRA2A|ADRA2B|ADRA2C|HTR2A|MAOA|MAOB	150	ADRA2A	adrenoceptor alpha 2A	Known	0.7372	0.9317	0.9317	0.3497	0.5	0.5	0.9987	8	0	1	0	0	0	0	0	1	0.0276	Y	1	FALSE	TRUE
BRD-K33396764	alpha-linolenic-acid	omega-3 fatty acid, ELOVL4|FADS1|FADS2|FFAR1|FFAR4|PTGS2|SLC8A1|TRPV1	1786	DNMT1	DNA methyltransferase 1	pQSAR	0.8317	0.9209	0.9209	0.1159	0.5	0.5	0.9987	2	1	1	0	0	0	0	0	0	0.0061	N	0	TRUE	FALSE
BRD-K37798499	etoposide	topoisomerase inhibitor|cell cycle inhibitor|DNA inhibitor|DNA intercalating drug|DNA repair enzyme inhibitor, TOP2A|CYP2E1|CYP3A5|TOP2B	3551	IKBKB	inhibitor of nuclear factor kappa B kinase subunit beta	pQSAR	0.946	0.8879	0.8879	0.1419	0.5	0.5109	0.9987	2	1	1	0	0	0	0	0	0	0.0002	N	0	TRUE	FALSE
BRD-K37949327	etidronic-acid	bisphosphonate|bone resorption inhibitor|farnesyl pyrophosphate synthase inhibitors|hypercalcaemic agent|osteoclast inhibitor, PTPRS|ATP6V1A|FDPS	2224	FDPS	farnesyl diphosphate synthase	Known	0.4722	0.9506	0.9506	0.4967	0.5	0.5	0.9987	8	0	1	0	0	0	0	0	1	0.3844	Y	1	FALSE	TRUE
BRD-K39915878	loxapine	dopamine receptor antagonist|serotonin receptor antagonist|dopamine receptor ligand, DRD2|DRD3|DRD4|DRD1|HRH1|HTR2A|HTR2C|HTR6|ADRA1A|ADRA1B|ADRA2A|ADRA2B|ADRA2C|ADRB1|CHRM1|CHRM2|CHRM3|CHRM4|CHRM5|DRD5|HRH2|HRH4|HTR1A|HTR1B|HTR1D|HTR1E|HTR3A|HTR5A|HTR7|SLC6A2|SLC6A3|SLC6A4	2562	GABRB3	gamma-aminobutyric acid type A receptor subunit beta3	StructureLikely	0.5517	0.9458	0.9584	0.9092	0.5	0.5	0.9987	5	0	1	0	0	1	0	0	0	0.2087	N	0	FALSE	TRUE
BRD-K42191735	buparlisib	PI3K inhibitor|protein kinase inhibitor, PIK3CA|PIK3CG	5291	PIK3CB	phosphatidylinositol-4,5-bisphosphate 3-kinase catalytic subunit beta	pIC50	0.8104	0.9241	0.9241	0.3497	0.5	0.5	0.9987	7	1	1	0	0	0	0	1	0	0.009	N	0	TRUE	TRUE
BRD-K45149020	amcinonide	corticosteroid agonist|cytochrome P450 inhibitor|glucocorticoid receptor agonist|immunosuppressant, NR3C1|ANXA1	301	ANXA1	annexin A1	Known	0.8199	0.9225	0.96	0.9908	0.5	0.5	0.9987	8	1	1	0	0	1	1	0	1	0.0076	Y	1	TRUE	TRUE
BRD-K47983010	BX-795	IKK inhibitor|PDK1 inhibitor|phosphoinositide dependent kinase inhibitor|serine/threonine kinase inhibitor|TBK1 inhibitor, PDPK1|CDK2|CHEK1|GSK3B|IKBKE|KDR|PDK1|TBK1	3717	JAK2	Janus kinase 2	pIC50	0.8361	0.9194	0.9194	0.3846	0.5	0.5	0.9987	7	1	1	0	0	0	0	1	0	0.0056	N	0	TRUE	TRUE
BRD-K49865102	PD-0325901	MEK inhibitor|MAP kinase inhibitor|protein kinase inhibitor, MAP2K1|MAP2K2	5605	MAP2K2	mitogen-activated protein kinase kinase 2	Known	0.8361	0.9191	0.9258	0.9908	0.4783	0.5	0.9987	8	1	1	0	0	1	1	0	1	0.0056	Y	1	TRUE	TRUE
BRD-K52911425	GDC-0941	PI3K inhibitor, PIK3CG|PIK3CA|PIK3CB|PIK3CD	5290	PIK3CA	phosphatidylinositol-4,5-bisphosphate 3-kinase catalytic subunit alpha	Known	0.7987	0.9241	0.9241	0.3265	0.5	0.5	0.9987	8	0	1	0	0	0	0	1	1	0.011	Y	1	FALSE	TRUE
BRD-K52989797	clomipramine	serotonin transporter (SERT) inhibitor|dopamine transporter (DAT) inhibitor|norepinephrine transporter (NET) inhibitor, SLC6A4|SLC6A2|CYP2C19|GSTP1|HTR2A|HTR2B|HTR2C|SLC6A3	3269	HRH1	histamine receptor H1	pIC50	0.4418	0.9524	0.9625	0.8734	0.5	0.5	0.9987	7	0	1	0	0	1	0	1	0	0.4653	N	0	FALSE	TRUE
BRD-K53737926	amitriptyline	norepinephrine inhibitor|serotonin receptor inhibitor|sigma receptor inhibitor, CHRM1|CHRM2|CHRM3|CHRM4|CHRM5|HRH1|HTR6|SLC6A2|SLC6A4|ADRA1A|ADRA1B|ADRA1D|ADRA2A|ADRB1|ADRB2|ADRB3|HRH2|HRH4|HTR1A|HTR1B|HTR1D|HTR2A|HTR2C|HTR7|KCNA1|KCND2|KCND3|KCNQ2|KCNQ3|NTRK1|NTRK2|OPRD1|OPRK1|OPRM1|SIGMAR1	775	CACNA1C	calcium voltage-gated channel subunit alpha1 C	pQSAR	0.8927	0.9079	0.9079	0.1881	0.5	0.5	0.9987	2	1	1	0	0	0	0	0	0	0.0015	N	0	TRUE	FALSE
BRD-K53857191	risperidone	dopamine receptor antagonist|serotonin receptor antagonist|adrenergic receptor antagonist, DRD2|HTR2A|ADRA1A|ADRA1B|DRD3|HRH1|HTR1A|HTR1D|HTR2C|ADRA1D|ADRA2A|ADRA2B|ADRA2C|CYP3A5|DRD1|DRD4|HTR1B|HTR1E|HTR1F|HTR6|HTR7	3269	HRH1	histamine receptor H1	Known	0.946	0.8876	0.9202	0.7043	0.5	0.5	0.9987	8	1	1	0	0	0	0	1	1	0.0002	Y	1	TRUE	TRUE
BRD-K55106630	dienestrol	estrogen receptor agonist, ESR1	2099	ESR1	estrogen receptor 1	Known	0.4957	0.9492	0.9492	0.9908	0.5	0.5	0.9987	8	0	1	0	0	1	1	1	1	0.3263	Y	1	FALSE	TRUE
BRD-K57033106	tripelennamine	histamine receptor antagonist, HRH1	3269	HRH1	histamine receptor H1	Known	0.7739	0.9287	0.9631	0.9146	0.5	0.5	0.9987	8	0	1	0	0	1	0	1	1	0.0163	Y	1	FALSE	TRUE
BRD-K58685305	emodin	11-beta hydroxysteroid dehydrogenase inhibitor, CSNK2A1|CSNK2A2|CSNK2B|IL6|PTP4A3	367	AR	androgen receptor	pQSAR	0.8525	0.9174	0.9174	0.4895	0.5	0.4912	0.9987	2	1	1	0	0	0	0	0	0	0.004	N	0	TRUE	FALSE
BRD-K62737565	gabapentin	calcium channel antagonist|voltage-gated calcium channel ligand, CACNA2D1|CACNA2D2|ADORA1|CACNA1B|GRIN1|GRIN2A|GRIN2B|GRIN2C|GRIN2D|GRIN3A|GRIN3B	3156	HMGCR	3-hydroxy-3-methylglutaryl-CoA reductase	pQSAR	0.8317	0.9198	0.9198	0.1217	0.5	0.5	0.9987	2	1	1	0	0	0	0	0	0	0.0061	N	0	TRUE	FALSE
BRD-K72414522	AZD-5438	CDK inhibitor, CCNB1|CCNE1|CDK1|CDK2|KCNH2	3551	IKBKB	inhibitor of nuclear factor kappa B kinase subunit beta	pQSAR	0.8626	0.9147	0.9147	0.4282	0.5	0.5	0.9987	2	1	1	0	0	0	0	0	0	0.0032	N	0	TRUE	FALSE
BRD-K74133369	oligomycin-a	ATP synthase inhibitor|ATPase inhibitor, ATP5A1	2562	GABRB3	gamma-aminobutyric acid type A receptor subunit beta3	pQSAR	0.8014	0.9241	0.9241	0.2312	0.5	0.5	0.9987	2	1	1	0	0	0	0	0	0	0.0105	N	0	TRUE	FALSE
BRD-K75527158	alendronic-acid	bisphosphonate|bone resorption inhibitor|osteoclast inhibitor|tyrosine phosphatase inhibitor, FDPS|PTPRS|ATP6V1A|PTPN4|PTPRE	2224	FDPS	farnesyl diphosphate synthase	Known	0.4743	0.9506	0.9506	0.4967	0.5	0.5	0.9987	8	0	1	0	0	0	0	0	1	0.3789	Y	1	FALSE	TRUE
BRD-K80451230	zamifenacin	acetylcholine receptor antagonist, CHRM3	1131	CHRM3	cholinergic receptor muscarinic 3	Known	0.8428	0.9175	0.9175	0.538	0.5	0.5	0.9987	8	1	1	0	0	0	0	1	1	0.0049	Y	1	TRUE	TRUE
BRD-K81418486	vorinostat	HDAC inhibitor|cell cycle inhibitor, HDAC1|HDAC2|HDAC3|HDAC6|HDAC8|HDAC10|HDAC11|HDAC5|HDAC9	10014	HDAC5	histone deacetylase 5	Known	0.7629	0.9289	0.9289	0.6489	0.8137	0.7087	0.9987	8	0	1	0	1	0	0	0	1	0.0192	Y	1	FALSE	TRUE
BRD-K86858124	paclitaxel	tubulin inhibitor|microtubule stabilizing agent|microtubule stimulant|P glycoprotein inhibitor|taxane, TUBB|NR1I2|ABCB1|BCL2|CYP2C8|MAP2|MAP4|MAPT|TLR4|TUBB1	5690	PSMB2	proteasome 20S subunit beta 2	pQSAR	0.8491	0.9167	0.9167	0.1298	0.5	0.5	0.9987	2	1	1	0	0	0	0	0	0	0.0043	N	0	TRUE	FALSE
BRD-K87202646	isoniazid	enoyl-(acyl-carrier protein) reductase Fabl inhibitor, CYP2E1	1571	CYP2E1	cytochrome P450 family 2 subfamily E member 1	Known	0.699	0.9351	0.9351	0.4608	0.5	0.5	0.9987	8	0	1	0	0	0	0	0	1	0.0452	Y	1	FALSE	TRUE
BRD-K88741031	methyl-2,5-dihydroxycinnamate	EGFR inhibitor|tyrosine kinase inhibitor, EGFR	3551	IKBKB	inhibitor of nuclear factor kappa B kinase subunit beta	pQSAR	0.946	0.8869	0.8869	0.2931	0.5	0.5	0.9987	2	1	1	0	0	0	0	0	0	0.0002	N	0	TRUE	FALSE
BRD-K91263825	nortriptyline	PI3K inhibitor|potassium channel blocker|tricyclic antidepressant (TCA), KCNJ10|SLC6A2|SLC6A4|ADRA1A|ADRA1B|ADRA1D|ADRA2A|ADRA2B|ADRA2C|ADRB1|ADRB2|ADRB3|CHRM1|CHRM2|CHRM3|CHRM4|CHRM5|CYP2C19|DRD2|HRH1|HTR1A|HTR2A|HTR2C|HTR6|PGRMC1|PIK3CD|SIGMAR1	154	ADRB2	adrenoceptor beta 2	Known	0.83	0.9194	0.9572	0.7546	0.5	0.5	0.9987	8	1	1	0	0	0	0	0	1	0.0063	Y	1	TRUE	TRUE
BRD-K91511962	desoxycortone	mineralocorticoid receptor agonist, NR3C1|NR3C2	2099	ESR1	estrogen receptor 1	StructureLikely	0.708	0.9342	0.9701	0.8673	0.5	0.5	0.9987	5	0	1	0	0	1	0	0	0	0.0404	N	0	FALSE	TRUE
BRD-K95309561	dienestrol	estrogen receptor agonist, ESR1	23411	SIRT1	sirtuin 1	pQSAR	0.8164	0.9214	0.9214	0.4967	0.5	0.5	0.9987	2	1	1	0	0	0	0	0	0	0.0081	N	0	TRUE	FALSE
BRD-A01078468	hexestrol	synthetic estrogen, inhibitor of microtubule polymerization, ESR1|AKR1C1|ESR2	5743	PTGS2	prostaglandin-endoperoxide synthase 2	pQSAR	0.9378	0.8879	0.8879	0.5165	0.5	0.5	0.9986	2	1	1	0	0	0	0	0	0	0.0003	N	0	TRUE	FALSE
BRD-A13122391	triptolide	RNA polymerase inhibitor, CYP2C19|RELA	1021	CDK6	cyclin dependent kinase 6	pQSAR	0.8469	0.9143	0.9143	0.1096	0.6819	0.5917	0.9986	2	1	1	0	0	0	0	0	0	0.0045	N	0	TRUE	FALSE
BRD-A34806832	proscillaridin	ATPase inhibitor, ATP1A1	486	FXYD2	FXYD domain containing ion transport regulator 2	NCI60	0.4264	0.9518	0.9571	0.6079	0.5434	0.8223	0.9986	3	0	1	1	0	0	0	0	0	0.5075	N	0	FALSE	TRUE
BRD-A35033682	eriodictyol	cytochrome P450 inhibitor|TRPM3 antagonist|xanthine oxidase inhibitor, CYP1B1|NFE2L2|XDH	1956	EGFR	epidermal growth factor receptor	pQSAR	0.8669	0.9109	0.9218	0.6405	0.5	0.5	0.9986	2	1	1	0	0	0	0	0	0	0.0029	N	0	TRUE	FALSE
BRD-A52588987	SKF-83566	dopamine receptor antagonist, DRD1|DRD5	1812	DRD1	dopamine receptor D1	Known	0.708	0.932	0.9637	0.8603	0.5	0.5	0.9986	8	0	1	0	0	1	0	1	1	0.0404	Y	1	FALSE	TRUE
BRD-A58753560	budesonide	glucocorticoid receptor agonist|glucocordicoid receptor antagonist|immunosuppressant, NR3C1|CYP3A5|CYP3A7	2908	NR3C1	nuclear receptor subfamily 3 group C member 1	Known	0.4853	0.9481	0.977	0.9908	0.5	0.5	0.9986	8	0	1	0	0	1	1	1	1	0.3514	Y	1	FALSE	TRUE
BRD-A71459254	cymarin	ATPase inhibitor, ATP1A1	3551	IKBKB	inhibitor of nuclear factor kappa B kinase subunit beta	pQSAR	0.8026	0.9219	0.9219	0.2608	0.6463	0.5	0.9986	2	1	1	0	0	0	0	0	0	0.0103	N	0	TRUE	FALSE
BRD-A84066268	BRD-A84066268	ATPase inhibitor, ATP1A1|ATP1A2|ATP1A3|ATP1A4|ATP1B1|ATP1B2|ATP1B3|ATP1B4|FXYD2	6097	RORC	RAR related orphan receptor C	NCI60	0.6142	0.9409	0.9409	0.5308	0.692	0.8156	0.9986	3	0	1	1	0	0	0	0	0	0.1161	N	0	FALSE	TRUE
BRD-A92826379	lupanine	ATP channel blocker|insulin secretagogue|Sodium Channel Blockers|sodium channel blocker, INS	1131	CHRM3	cholinergic receptor muscarinic 3	pQSAR	0.8731	0.9098	0.9098	0.2716	0.5	0.5	0.9986	2	1	1	0	0	0	0	0	0	0.0025	N	0	TRUE	FALSE
BRD-K01095011	finasteride	5 alpha reductase inhibitor|androgen receptor antagonist|steroid 5alpha-reductase inhibitor, SRD5A2|SRD5A1|AKR1D1|AR	1577	CYP3A5	cytochrome P450 family 3 subfamily A member 5	pQSAR	0.9062	0.9007	0.9007	0.4752	0.5	0.5	0.9986	2	1	1	0	0	0	0	0	0	0.001	N	0	TRUE	FALSE
BRD-K01648091	LE-300	dopamine receptor antagonist|dopamine receptor ligand|serotonin receptor ligand, DRD5|DRD1|HTR2A	3269	HRH1	histamine receptor H1	pQSAR	0.8525	0.915	0.9221	0.5549	0.5	0.5	0.9986	2	1	1	0	0	0	0	0	0	0.004	N	0	TRUE	FALSE
BRD-K06080977	eicosatetraynoic-acid	cyclooxygenase inhibitor|lipoxygenase inhibitor, ALOX12|PPARA|PPARG|PTGS1	5465	PPARA	peroxisome proliferator activated receptor alpha	Known	0.5905	0.9416	0.9416	0.468	0.5	0.5	0.9986	8	0	1	0	0	0	0	1	1	0.1465	Y	1	FALSE	TRUE
BRD-K06902185	minoxidil	antialopecia agent|ATP channel activator|ATP-sensitive potassium channel agonist|KATP activator|Kir6 channel (KATP) activator|polarization activator|renin secretion stimulant, KCNJ8|ABCC9|KCNJ1|KCNJ10|KCNJ11|PTGS1|REN	3767	KCNJ11	potassium inwardly rectifying channel subfamily J member 11	Known	0.5627	0.9435	0.9435	0.1248	0.5	0.5	0.9986	8	0	1	0	0	0	0	0	1	0.1894	Y	1	FALSE	TRUE
BRD-K22936972	diphenylpyraline	dopamine reuptake inhibitor|histamine receptor antagonist, HRH1|SLC6A3	1066	CES1	carboxylesterase 1	pQSAR	0.9003	0.9042	0.9042	0.5021	0.5	0.5	0.9986	2	1	1	0	0	0	0	0	0	0.0012	N	0	TRUE	FALSE
BRD-K23913458	coumarin	vitamin antagonist, CA1|CA12|CA14|CA2|CA4|CA6|CA9|CYP2A6	5743	PTGS2	prostaglandin-endoperoxide synthase 2	pQSAR	0.8284	0.9185	0.9334	0.7635	0.5	0.5	0.9986	2	1	1	0	0	0	0	0	0	0.0065	N	0	TRUE	FALSE
BRD-K26674531	GR-235	FXR antagonist|cholesterol inhibitor|estrogen receptor agonist|IKK inhibitor|progesterone receptor agonist|PXR agonist, ESR1|IKBKB|NR1H4|NR1I2|PGR	2908	NR3C1	nuclear receptor subfamily 3 group C member 1	StructureSure	0.6777	0.9349	0.9771	0.9908	0.5	0.5	0.9986	6	0	1	0	0	1	1	0	0	0.0583	N	0	FALSE	TRUE
BRD-K28761384	zuclopenthixol	dopamine receptor antagonist, DRD2|DRD1|ADRA1A|ADRA2A|DRD5|HRH1|HTR2A	1131	CHRM3	cholinergic receptor muscarinic 3	StructureLikely	0.6765	0.9361	0.9516	0.8365	0.5	0.5	0.9986	5	0	1	0	0	1	0	0	0	0.0591	N	0	FALSE	TRUE
BRD-K33106058	cytarabine	antimetabolite|DNA polymerase inhibitor|DNA synthesis inhibitor|ribonucleotide reductase inhibitor, POLB|POLA1	5422	POLA1	DNA polymerase alpha 1, catalytic subunit	Known	0.7013	0.9334	0.9752	0.9908	0.5	0.8919	0.9986	8	0	1	1	0	1	1	0	1	0.0439	Y	1	FALSE	TRUE
BRD-K33106058	cytarabine	antimetabolite|DNA polymerase inhibitor|DNA synthesis inhibitor|ribonucleotide reductase inhibitor, POLB|POLA1	6240	RRM1	ribonucleotide reductase catalytic subunit M1	NCI60	0.6965	0.9334	0.9401	0.7806	0.5	0.8011	0.9986	3	0	1	1	0	0	0	0	0	0.0466	N	0	FALSE	TRUE
BRD-K36616567	doxepin	histamine receptor antagonist|adrenergic transmitter uptake inhibitor|histamine receptor inhibitor|norepinephrine reputake inhibitor|serotonin reuptake inhibitor|tricyclic antidepressant, HRH1|HRH2|SLC6A2|SLC6A4|ADRA1A|ADRA1B|ADRA1D|ADRA2A|ADRA2B|ADRA2C|CHRM1|CHRM2|CHRM3|CHRM4|CHRM5|CYP2C19|DRD2|HRH4|HTR1A|HTR2A|HTR2B|HTR2C|HTR6|KCNH2|SLC6A3	154	ADRB2	adrenoceptor beta 2	StructureLikely	0.6574	0.9361	0.9682	0.8273	0.5	0.5	0.9986	5	0	1	0	0	1	0	0	0	0.0735	N	0	FALSE	TRUE
BRD-K40476324	digoxin	ATPase inhibitor|ROR antagonist, ATP1A1|ABCB1|RORC|SLCO1B3	375	ARF1	ADP ribosylation factor 1	pQSAR	0.826	0.9193	0.9193	0.1248	0.5	0.2844	0.9986	2	1	1	0	0	0	0	0	0	0.0068	N	0	TRUE	FALSE
BRD-K43544024	oxandrolone	androgen receptor agonist|corticosteroid agonist|RNA directed RNA polymerase stimulant, AR	367	AR	androgen receptor	Known	0.6328	0.9383	0.9492	0.7606	0.5	0.5	0.9986	8	0	1	0	0	0	0	0	1	0.0959	Y	1	FALSE	TRUE
BRD-K47036706	fluocinonide	corticosteroid agonist|corticosteroid hormone receptor agonist, NR3C1|SERPINA6|SMO	866	SERPINA6	serpin family A member 6	Known	0.5044	0.9473	0.9719	0.9908	0.5	0.5	0.9986	8	0	1	0	0	1	1	0	1	0.3059	Y	1	FALSE	TRUE
BRD-K47278471	diphenhydramine	histamine receptor antagonist, HRH1	4128	MAOA	monoamine oxidase A	pQSAR	0.826	0.9178	0.9178	0.6447	0.5	0.5	0.9986	2	1	1	0	0	0	0	0	0	0.0068	N	0	TRUE	FALSE
BRD-K49448285	bisindolylmaleimide	CDK inhibitor|PKC inhibitor|leucine rich repeat kinase inhibitor, CCND1|CDK4|LRRK2|PDPK1|PIM1|PRKCA|PRKCB|PRKCI|PRKCZ	1432	MAPK14	mitogen-activated protein kinase 14	pQSAR	0.8586	0.9123	0.9123	0.5165	0.5	0.5	0.9986	2	1	1	0	0	0	0	0	0	0.0035	N	0	TRUE	FALSE
BRD-K57875380	asenapine	dopamine receptor antagonist|serotonin receptor antagonist, DRD2|HTR2A|DRD1|HRH1|HTR1A|HTR1B|ADRA1A|ADRA2A|ADRA2B|ADRA2C|ADRB1|ADRB2|DRD3|DRD4|HRH2|HTR1D|HTR1E|HTR2B|HTR2C|HTR5A|HTR6|HTR7	2554	GABRA1	gamma-aminobutyric acid type A receptor subunit alpha1	pQSAR	0.8976	0.9036	0.9036	0.5236	0.5	0.5	0.9986	2	1	1	0	0	0	0	0	0	0.0013	N	0	TRUE	FALSE
BRD-K59850506	gestrinone	progesterone receptor antagonist|Estradiol 17 beta dehydrogenase stimulant|estrone sulfotransferase stimulant, PGR|AR|ESR1	2908	NR3C1	nuclear receptor subfamily 3 group C member 1	pIC50	0.9062	0.9017	0.9017	0.581	0.5	0.5	0.9986	7	1	1	0	0	0	0	1	0	0.001	N	0	TRUE	TRUE
BRD-K60369935	ribavirin	antiviral guanosine ribonucleoside analog|IMPDH inhibitor|inosine monophosphate dehydrogenase inhibitor, IMPDH1|ADK|ENPP1|IMPDH2|NT5C2	3094	HINT1	histidine triad nucleotide binding protein 1	pQSAR	0.9378	0.8897	0.8897	0.5021	0.5	0.5	0.9986	2	1	1	0	0	0	0	0	0	0.0003	N	0	TRUE	FALSE
BRD-K64931368	aminocaproic-acid	plasmin inhibitor|plasminogen activator inhibitor, PLG|PLAT|LPA	1131	CHRM3	cholinergic receptor muscarinic 3	pQSAR	0.8003	0.9222	0.9222	0.1652	0.5	0.5	0.9986	2	1	1	0	0	0	0	0	0	0.0107	N	0	TRUE	FALSE
BRD-K68804560	benzatropine	anticholinergic, CHRM1|HRH1|SLC6A3	3269	HRH1	histamine receptor H1	Known	0.6611	0.9367	0.9747	0.9908	0.5	0.5	0.9986	8	0	1	0	0	1	1	1	1	0.0705	Y	1	FALSE	TRUE
BRD-K77947974	fluspirilene	dopamine receptor|dopamine receptor antagonist, DRD2|HTR2A|CACNG1|HRH1|HTR1A|HTR1D|HTR1E	801	CALM1	calmodulin 1	pQSAR	0.838	0.9168	0.9335	0.6571	0.5	0.7085	0.9986	2	1	1	0	0	0	0	0	0	0.0054	N	0	TRUE	FALSE
BRD-K80110068	cortisone	glucocorticoid receptor agonist, NR3C1	367	AR	androgen receptor	StructureLikely	0.5936	0.9412	0.9685	0.9031	0.5	0.5	0.9986	5	0	1	0	0	1	0	0	0	0.1422	N	0	FALSE	TRUE
BRD-K80315159	DPPE	histamine receptor antagonist, ABCB1|HRH1	3269	HRH1	histamine receptor H1	Known	0.848	0.9144	0.9144	0.4165	0.5	0.5	0.9986	8	1	1	0	0	0	0	0	1	0.0044	Y	1	TRUE	TRUE
BRD-K81091703	chlorprothixene	dopamine receptor|dopamine receptor antagonist, DRD2|CHRM1|CHRM2|CHRM3|CHRM4|CHRM5|DRD1|DRD3|HRH1|HTR2A|HTR2B|HTR2C	150	ADRA2A	adrenoceptor alpha 2A	pIC50	0.5861	0.9416	0.9513	0.8365	0.5	0.5	0.9986	7	0	1	0	0	1	0	1	0	0.1528	N	0	FALSE	TRUE
BRD-K86858124	paclitaxel	tubulin inhibitor|microtubule stabilizing agent|microtubule stimulant|P glycoprotein inhibitor|taxane, TUBB|NR1I2|ABCB1|BCL2|CYP2C8|MAP2|MAP4|MAPT|TLR4|TUBB1	836	CASP3	caspase 3	pQSAR	0.8361	0.9167	0.9167	0.1298	0.5	0.5	0.9986	2	1	1	0	0	0	0	0	0	0.0056	N	0	TRUE	FALSE
BRD-K92093830	doxorubicin	topoisomerase inhibitor|DNA intercalating drug, TOP2A	7150	TOP1	DNA topoisomerase I	pQSAR	0.8491	0.9156	0.9156	0.1611	0.5	0.771	0.9986	2	1	1	0	0	0	0	0	0	0.0043	N	0	TRUE	FALSE
BRD-K92310201	mometasone	glucocorticoid receptor agonist|immunosuppressant, NR3C1	1577	CYP3A5	cytochrome P450 family 3 subfamily A member 5	StructureLikely	0.732	0.9312	0.9584	0.824	0.5	0.5	0.9986	5	0	1	0	0	1	0	0	0	0.0296	N	0	FALSE	TRUE
BRD-K96319534	phentermine	adrenergic transmitter uptake inhibitor|dopamine transmitter uptake inhibitor|serotonin uptake inhibitor, MAOA|MAOB|SLC6A2|SLC6A3|SLC6A4	4129	MAOB	monoamine oxidase B	Known	0.6044	0.9407	0.9407	0.4967	0.5	0.5	0.9986	8	0	1	0	0	0	0	0	1	0.128	Y	1	FALSE	TRUE
BRD-A06352418	terfenadine	histamine receptor antagonist, HRH1|KCNH2|CHRM1|CHRM2|CHRM3|CHRM4|CHRM5|KCNH1	801	CALM1	calmodulin 1	pQSAR	0.838	0.9145	0.9145	0.3265	0.5	0.5	0.9985	2	1	1	0	0	0	0	0	0	0.0054	N	0	TRUE	FALSE
BRD-A07780951	orciprenaline	adrenergic receptor agonist, ADRB2	154	ADRB2	adrenoceptor beta 2	Known	0.6158	0.9387	0.9635	0.9908	0.5	0.5	0.9985	8	0	1	0	0	1	1	0	1	0.1143	Y	1	FALSE	TRUE
BRD-A23072235	pheniramine	acetylcholine receptor antagonist, HRH1	3269	HRH1	histamine receptor H1	Known	0.7293	0.9288	0.9642	0.9207	0.5	0.5	0.9985	8	0	1	0	0	1	0	0	1	0.0307	Y	1	FALSE	TRUE
BRD-A24228527	ofloxacin	antibiotic that inhibits DNA gyrase|topoisomerase inhibitor, TOP2A	7153	TOP2A	DNA topoisomerase II alpha	Known	0.5032	0.9457	0.9752	0.9908	0.5	0.8919	0.9985	8	0	1	1	0	1	1	0	1	0.3085	Y	1	FALSE	TRUE
BRD-A35108200	dexamethasone	glucocorticoid receptor agonist|corticosteroid agonist|immunosuppressant, ANXA1|CYP3A4|CYP3A5|NOS2|NR0B1|NR3C1|NR3C2	866	SERPINA6	serpin family A member 6	StructureSure	0.8428	0.9135	0.9737	0.9683	0.5	0.8096	0.9985	6	1	1	1	0	1	1	0	0	0.0049	N	0	TRUE	TRUE
BRD-A37780065	triamcinolone	antiinflammatory agent|corticosteroid agonist|corticosteroid binding globulin binder|corticosteroid hormone receptor agonist|cytochrome P450 inhibitor|glucocorticoid receptor agonist|immunosuppressant|immunosuppressive agent, NR3C1|CYP3A5|CYP3A7|SERPINA6	367	AR	androgen receptor	pQSAR	0.8073	0.9188	0.9494	0.6247	0.5	0.5722	0.9985	2	1	1	0	0	0	0	0	0	0.0095	N	0	TRUE	FALSE
BRD-A48570745	ivermectin	GABA receptor agonist|acetylcholine receptor allosteric modulator|GABA release stimulant|purinergic receptor allosteric modulator, CHRNA7|GABRB3|GLRA3|P2RX7	2475	MTOR	mechanistic target of rapamycin kinase	pQSAR	0.8185	0.917	0.917	0.3933	0.5	0.5	0.9985	2	1	1	0	0	0	0	0	0	0.0078	N	0	TRUE	FALSE
BRD-A56245458	reichstein	androgen receptor antagonist, AR	2908	NR3C1	nuclear receptor subfamily 3 group C member 1	StructureLikely	0.6953	0.9323	0.9686	0.9031	0.5	0.5	0.9985	5	0	1	0	0	1	0	0	0	0.0473	N	0	FALSE	TRUE
BRD-A56470328	fludrocortisone	glucocorticoid receptor agonist|mineralocorticoid receptor agonist, NR3C2|AR|NR3C1	2099	ESR1	estrogen receptor 1	StructureLikely	0.641	0.9364	0.9596	0.8273	0.5	0.5	0.9985	5	0	1	0	0	1	0	0	0	0.0879	N	0	FALSE	TRUE
BRD-A56592690	PX-12	thioredoxin inhibitor|thioredoxin reductase inhibitor|apoptosis stimulant|tubulin polymerisation inhibitor, TXN|TXNRD1|TXNRD2	3614	IMPDH1	inosine monophosphate dehydrogenase 1	pQSAR	0.8491	0.9126	0.9126	0.1419	0.5	0.5	0.9985	2	1	1	0	0	0	0	0	0	0.0043	N	0	TRUE	FALSE
BRD-A67373739	AICA-ribonucleotide	adenosine release stimulant|AMPK stimulant, ATIC|PRKAA1	1738	DLD	dihydrolipoamide dehydrogenase	pQSAR	0.8881	0.9046	0.9046	0.4967	0.5	0.5	0.9985	2	1	1	0	0	0	0	0	0	0.0017	N	0	TRUE	FALSE
BRD-A92537424	danazol	estrogen receptor antagonist|luteinizing hormone releasing hormone antagonist|progesterone receptor agonist|steroid derivative with antigonadotropic and anti-estrogenic activities|tumor necrosis factor modulator, ESR1|GNRHR|AR|CCL2|CYP2C8|GNRHR2|PGR|TNF	367	AR	androgen receptor	Known	0.8098	0.9191	0.9765	0.9908	0.5	0.5	0.9985	8	1	1	0	0	1	1	0	1	0.0091	Y	1	TRUE	TRUE
BRD-K06980535	promazine	dopamine receptor|dopamine receptor antagonist, CHRM5|DRD2|ADRA1A|ADRA1B|ADRA1D|CHRM1|CHRM2|CHRM3|CHRM4|DRD1|DRD3|DRD4|HRH1|HTR2A|HTR2C	150	ADRA2A	adrenoceptor alpha 2A	StructureLikely	0.3064	0.9572	0.9572	0.8939	0.5	0.5	0.9985	5	0	1	0	0	1	0	0	0	0.8081	N	0	FALSE	TRUE
BRD-K08619574	thioproperazine	dopamine receptor antagonist, ADRA1A|ADRA1B|DRD1|DRD2|HTR1A|HTR2A	154	ADRB2	adrenoceptor beta 2	pQSAR	0.8067	0.9195	0.9195	0.3149	0.5	0.5	0.9985	2	1	1	0	0	0	0	0	0	0.0096	N	0	TRUE	FALSE
BRD-K26674531	GR-235	FXR antagonist|cholesterol inhibitor|estrogen receptor agonist|IKK inhibitor|progesterone receptor agonist|PXR agonist, ESR1|IKBKB|NR1H4|NR1I2|PGR	367	AR	androgen receptor	StructureSure	0.6041	0.9389	0.9771	0.9908	0.5	0.5	0.9985	6	0	1	0	0	1	1	0	0	0.1284	N	0	FALSE	TRUE
BRD-K28143534	cyproheptadine	histamine receptor antagonist|serotonin receptor antagonist, HRH1|ADRA1A|ADRA1B|ADRA1D|CHRM1|CHRM2|CHRM3|HTR2A|HTR2B|HTR2C|HTR6|HTR7	3269	HRH1	histamine receptor H1	Known	0.5506	0.9432	0.9432	0.5901	0.5	0.5	0.9985	8	0	1	0	0	0	0	0	1	0.2106	Y	1	FALSE	TRUE
BRD-K28761384	zuclopenthixol	dopamine receptor antagonist, DRD2|DRD1|ADRA1A|ADRA2A|DRD5|HRH1|HTR2A	1128	CHRM1	cholinergic receptor muscarinic 1	StructureLikely	0.6493	0.9361	0.9574	0.8499	0.5	0.5	0.9985	5	0	1	0	0	1	0	0	0	0.0803	N	0	FALSE	TRUE
BRD-K30189597	SYK-inhibitor	syk inhibitor, SYK	3932	LCK	LCK proto-oncogene, Src family tyrosine kinase	pQSAR	0.9168	0.8944	0.8944	0.5901	0.5	0.5	0.9985	2	1	1	0	0	0	0	0	0	0.0007	N	0	TRUE	FALSE
BRD-K31987754	oleylethanolamide	Glucose-Dependent Insulinotropic Receptor (GDIR, GPR119) Agonists|potassium channel blocker, GPR119|CNR1|GPR55|KCND3|PPARA	5743	PTGS2	prostaglandin-endoperoxide synthase 2	pQSAR	0.8221	0.918	0.9354	0.5685	0.5	0.5	0.9985	2	1	1	0	0	0	0	0	0	0.0073	N	0	TRUE	FALSE
BRD-K33396764	alpha-linolenic-acid	omega-3 fatty acid, ELOVL4|FADS1|FADS2|FFAR1|FFAR4|PTGS2|SLC8A1|TRPV1	5465	PPARA	peroxisome proliferator activated receptor alpha	StructureLikely	0.4406	0.9491	0.965	0.8908	0.5	0.5	0.9985	5	0	1	0	0	1	0	0	0	0.4686	N	0	FALSE	TRUE
BRD-K35240538	methylprednisolone	glucocorticoid receptor agonist, NR3C1	190	NR0B1	nuclear receptor subfamily 0 group B member 1	NCI60	0.5832	0.9404	0.9405	0.5901	0.5	0.8096	0.9985	3	0	1	1	0	0	0	0	0	0.157	N	0	FALSE	TRUE
BRD-K35573744	erbstatin-analog	EGFR inhibitor|tyrosine kinase inhibitor, EGFR	1956	EGFR	epidermal growth factor receptor	Known	0.8049	0.9199	0.9199	0.9908	0.5	0.5	0.9985	8	1	1	0	0	1	1	0	1	0.0099	Y	1	TRUE	TRUE
BRD-K39915878	loxapine	dopamine receptor antagonist|serotonin receptor antagonist|dopamine receptor ligand, DRD2|DRD3|DRD4|DRD1|HRH1|HTR2A|HTR2C|HTR6|ADRA1A|ADRA1B|ADRA2A|ADRA2B|ADRA2C|ADRB1|CHRM1|CHRM2|CHRM3|CHRM4|CHRM5|DRD5|HRH2|HRH4|HTR1A|HTR1B|HTR1D|HTR1E|HTR3A|HTR5A|HTR7|SLC6A2|SLC6A3|SLC6A4	2565	GABRG1	gamma-aminobutyric acid type A receptor subunit gamma1	StructureLikely	0.5071	0.9458	0.9584	0.9092	0.5	0.5	0.9985	5	0	1	0	0	1	0	0	0	0.2996	N	0	FALSE	TRUE
BRD-K43149758	myricetin	androgen receptor ligand|cytochrome P450 inhibitor, PIK3CG|AR|CYP3A4	11156	PTP4A3	protein tyrosine phosphatase 4A3	pQSAR	0.8221	0.9174	0.9174	0.4398	0.5	0.5	0.9985	2	1	1	0	0	0	0	0	0	0.0073	N	0	TRUE	FALSE
BRD-K46424862	hymecromone	monoamine oxidase inhibitor, MAOA	79001	VKORC1	vitamin K epoxide reductase complex subunit 1	pQSAR	0.8207	0.9174	0.9174	0.2931	0.5	0.5	0.9985	2	1	1	0	0	0	0	0	0	0.0075	N	0	TRUE	FALSE
BRD-K48578705	methyldopa	adrenergic receptor agonist, DDC|ADRA2A	5743	PTGS2	prostaglandin-endoperoxide synthase 2	pQSAR	0.8185	0.9179	0.9179	0.4282	0.5	0.5	0.9985	2	1	1	0	0	0	0	0	0	0.0078	N	0	TRUE	FALSE
BRD-K49759007	phenazone	cyclooxygenase inhibitor, PTGS1|PTGS2	79001	VKORC1	vitamin K epoxide reductase complex subunit 1	pQSAR	0.8715	0.9077	0.9077	0.25	0.5	0.5	0.9985	2	1	1	0	0	0	0	0	0	0.0026	N	0	TRUE	FALSE
BRD-K52989797	clomipramine	serotonin transporter (SERT) inhibitor|dopamine transporter (DAT) inhibitor|norepinephrine transporter (NET) inhibitor, SLC6A4|SLC6A2|CYP2C19|GSTP1|HTR2A|HTR2B|HTR2C|SLC6A3	150	ADRA2A	adrenoceptor alpha 2A	StructureLikely	0.388	0.9524	0.9524	0.8017	0.5	0.5	0.9985	5	0	1	0	0	1	0	0	0	0.6131	N	0	FALSE	TRUE
BRD-K53342282	cortisol	corticosteroid agonist, NR3C1|NR3C2	866	SERPINA6	serpin family A member 6	StructureLikely	0.7236	0.9302	0.9659	0.8332	0.5	0.5	0.9985	5	0	1	0	0	1	0	0	0	0.0331	N	0	FALSE	TRUE
BRD-K53790871	triamcinolone	antiinflammatory agent|corticosteroid agonist|corticosteroid binding globulin binder|corticosteroid hormone receptor agonist|cytochrome P450 inhibitor|glucocorticoid receptor agonist|immunosuppressant|immunosuppressive agent, NR3C1|CYP3A5|CYP3A7|SERPINA6	301	ANXA1	annexin A1	StructureLikely	0.7601	0.9252	0.9661	0.8465	0.5	0.5	0.9985	5	0	1	0	0	1	0	0	0	0.02	N	0	FALSE	TRUE
BRD-K58746048	flurandrenolide	glucocorticoid receptor agonist., NR3C1|SERPINA6	866	SERPINA6	serpin family A member 6	Known	0.6093	0.9385	0.9618	0.9908	0.5	0.5	0.9985	8	0	1	0	0	1	1	0	1	0.122	Y	1	FALSE	TRUE
BRD-K69600043	thiethylperazine	dopamine receptor antagonist, DRD1|DRD2|DRD4	1812	DRD1	dopamine receptor D1	Known	0.5141	0.9451	0.9694	0.824	0.5	0.5	0.9985	8	0	1	0	0	1	0	1	1	0.2841	Y	1	FALSE	TRUE
BRD-K70358946	aripiprazole	serotonin receptor agonist|serotonin receptor antagonist|dopamine receptor agonist|dopamine receptor partial agonist|serotonin receptor partial agonist, DRD2|HTR1A|HTR2A|HRH1|HTR1B|HTR1D|HTR2C|ADRA1A|ADRA1B|ADRA2A|ADRA2B|ADRA2C|CHRM1|CHRM2|CHRM3|CHRM4|CHRM5|DRD1|DRD3|DRD4|DRD5|HTR1E|HTR3A|HTR6|HTR7	1131	CHRM3	cholinergic receptor muscarinic 3	Known	0.6992	0.9311	0.9311	0.4967	0.5	0.5	0.9985	8	0	1	0	0	0	0	0	1	0.0451	Y	1	FALSE	TRUE
BRD-K73251053	clorgiline	monoamine oxidase inhibitor, MAOA	5292	PIM1	Pim-1 proto-oncogene, serine/threonine kinase	pQSAR	0.9095	0.8982	0.8982	0.4752	0.5	0.5	0.9985	2	1	1	0	0	0	0	0	0	0.0009	N	0	TRUE	FALSE
BRD-K75527158	alendronic-acid	bisphosphonate|bone resorption inhibitor|osteoclast inhibitor|tyrosine phosphatase inhibitor, FDPS|PTPRS|ATP6V1A|PTPN4|PTPRE	4846	NOS3	nitric oxide synthase 3	pQSAR	0.8343	0.9153	0.9153	0.1065	0.5	0.5	0.9985	2	1	1	0	0	0	0	0	0	0.0058	N	0	TRUE	FALSE
BRD-K78712176	carbidopa	aromatic L-amino acid decarboxylase inhibitor|dopa decarboxylase (aromatic L-amino acid decarboxylase) inhibitor, DDC	154	ADRB2	adrenoceptor beta 2	pQSAR	0.8549	0.9117	0.9117	0.4608	0.5	0.5	0.9985	2	1	1	0	0	0	0	0	0	0.0038	N	0	TRUE	FALSE
BRD-K80110068	cortisone	glucocorticoid receptor agonist, NR3C1	2908	NR3C1	nuclear receptor subfamily 3 group C member 1	Known	0.5574	0.9419	0.977	0.9908	0.5	0.5	0.9985	8	0	1	0	0	1	1	0	1	0.1985	Y	1	FALSE	TRUE
BRD-K81774264	flumethasone	glucocorticoid receptor agonist., NR3C1|PLA2G1B	301	ANXA1	annexin A1	StructureLikely	0.67	0.9346	0.9697	0.9062	0.5	0.5	0.9985	5	0	1	0	0	1	0	0	0	0.0637	N	0	FALSE	TRUE
BRD-K82255054	propofol	membrane integrity inhibitor|membrane permeability inhibitor|TRPV agonist, CYP2B6|FAAH|GABRA1|GABRA2|GABRA3|GABRA4|GABRA5|GABRA6|GABRB1|GABRB2|GABRB3|GABRD|GABRE|GABRG1|GABRG2|GABRG3|GABRP|GABRQ|SCN2A|SCN4A|TRPV1	5743	PTGS2	prostaglandin-endoperoxide synthase 2	pQSAR	0.8448	0.9138	0.9138	0.1989	0.5	0.5	0.9985	2	1	1	0	0	0	0	0	0	0.0047	N	0	TRUE	FALSE
BRD-K83794624	pirarubicin	topoisomerase inhibitor, TOP2A	7153	TOP2A	DNA topoisomerase II alpha	Known	0.913	0.8973	0.973	0.9031	0.5	0.8383	0.9985	8	1	1	1	0	1	0	0	1	0.0008	Y	1	TRUE	TRUE
BRD-K88677950	PD-198306	MAP kinase inhibitor|MEK inhibitor, MAP2K1|MAP2K2|MAPK1|MAPK3	5604	MAP2K1	mitogen-activated protein kinase kinase 1	Known	0.6932	0.9318	0.96	0.8207	0.5	0.5	0.9985	8	0	1	0	0	1	0	0	1	0.0485	Y	1	FALSE	TRUE
BRD-K88809146	tranylcypromine	cytochrome P450 inhibitor|histone lysine demethylase inhibitor|monoamine oxidase inhibitor, MAOA|MAOB|KDM1A|CYP2A6	4129	MAOB	monoamine oxidase B	Known	0.6558	0.9347	0.9772	0.9908	0.5	0.5	0.9985	8	0	1	0	0	1	1	0	1	0.0748	Y	1	FALSE	TRUE
BRD-K91263825	nortriptyline	PI3K inhibitor|potassium channel blocker|tricyclic antidepressant (TCA), KCNJ10|SLC6A2|SLC6A4|ADRA1A|ADRA1B|ADRA1D|ADRA2A|ADRA2B|ADRA2C|ADRB1|ADRB2|ADRB3|CHRM1|CHRM2|CHRM3|CHRM4|CHRM5|CYP2C19|DRD2|HRH1|HTR1A|HTR2A|HTR2C|HTR6|PGRMC1|PIK3CD|SIGMAR1	1131	CHRM3	cholinergic receptor muscarinic 3	Known	0.6456	0.9364	0.9572	0.7546	0.5	0.5	0.9985	8	0	1	0	0	0	0	1	1	0.0836	Y	1	FALSE	TRUE
BRD-K91263825	nortriptyline	PI3K inhibitor|potassium channel blocker|tricyclic antidepressant (TCA), KCNJ10|SLC6A2|SLC6A4|ADRA1A|ADRA1B|ADRA1D|ADRA2A|ADRA2B|ADRA2C|ADRB1|ADRB2|ADRB3|CHRM1|CHRM2|CHRM3|CHRM4|CHRM5|CYP2C19|DRD2|HRH1|HTR1A|HTR2A|HTR2C|HTR6|PGRMC1|PIK3CD|SIGMAR1	775	CACNA1C	calcium voltage-gated channel subunit alpha1 C	pQSAR	0.838	0.9143	0.9143	0.2419	0.5	0.5	0.9985	2	1	1	0	0	0	0	0	0	0.0054	N	0	TRUE	FALSE
BRD-K93441486	diphemanil	acetylcholine receptor antagonist, CHRM3	1128	CHRM1	cholinergic receptor muscarinic 1	pIC50	0.9259	0.8916	0.8916	0.4967	0.5	0.5	0.9985	7	1	1	0	0	0	0	1	0	0.0005	N	0	TRUE	TRUE
BRD-A01078468	hexestrol	synthetic estrogen, inhibitor of microtubule polymerization, ESR1|AKR1C1|ESR2	154	ADRB2	adrenoceptor beta 2	pQSAR	0.8236	0.9159	0.9159	0.5452	0.5	0.5	0.9984	2	1	1	0	0	0	0	0	0	0.0071	N	0	TRUE	FALSE
BRD-A02180903	betamethasone	corticosteroid agonist|glucocorticoid receptor agonist, NR3C1	866	SERPINA6	serpin family A member 6	StructureSure	0.8221	0.9151	0.9741	0.9683	0.5	0.8096	0.9984	6	1	1	1	0	1	1	0	0	0.0073	N	0	TRUE	TRUE
BRD-A06352418	terfenadine	histamine receptor antagonist, HRH1|KCNH2|CHRM1|CHRM2|CHRM3|CHRM4|CHRM5|KCNH1	775	CACNA1C	calcium voltage-gated channel subunit alpha1 C	pQSAR	0.8903	0.9016	0.9016	0.468	0.5	0.5	0.9984	2	1	1	0	0	0	0	0	0	0.0016	N	0	TRUE	FALSE
BRD-A07765530	epinephrine	carbonic anhydrase activator|hormone|neurotransmitter, ADRA1A|ADRA1B|ADRA1D|ADRA2A|ADRA2B|ADRA2C|ADRB1|ADRB2|ADRB3|PAH|TNF	154	ADRB2	adrenoceptor beta 2	Known	0.5276	0.943	0.9693	0.8207	0.5	0.5	0.9984	8	0	1	0	0	1	0	0	1	0.2552	Y	1	FALSE	TRUE
BRD-A07893380	vigabatrin	GABA aminotransferase inhibitor, ABAT|GABBR1|SLC32A1	1131	CHRM3	cholinergic receptor muscarinic 3	pQSAR	0.8731	0.9057	0.9057	0.1338	0.5	0.5	0.9984	2	1	1	0	0	0	0	0	0	0.0025	N	0	TRUE	FALSE
BRD-A11263757	azacitidine	DNA methyltransferase inhibitor|antimetabolite|DNA methylase inhibitor|DNA synthesis inhibitor|RNA synthesis inhibitor, DNMT1	5292	PIM1	Pim-1 proto-oncogene, serine/threonine kinase	pQSAR	0.8699	0.9065	0.9065	0.5165	0.5	0.5703	0.9984	2	1	1	0	0	0	0	0	0	0.0027	N	0	TRUE	FALSE
BRD-A15914070	4-hydroxy-2-nonenal	cytotoxic lipid peroxidation product, IKBKB	2224	FDPS	farnesyl diphosphate synthase	pQSAR	0.8448	0.9119	0.9119	0.1059	0.5	0.5	0.9984	2	1	1	0	0	0	0	0	0	0.0047	N	0	TRUE	FALSE
BRD-A17655518	ibuprofen	cyclooxygenase inhibitor|NFkB pathway inhibitor, PTGS2|PTGS1|ASIC1|BCL2|CFTR|CYP2C8|FABP2|PLAT|PPARG|SLC5A8|THBD	1577	CYP3A5	cytochrome P450 family 3 subfamily A member 5	pQSAR	0.8055	0.9188	0.9188	0.2419	0.5	0.5	0.9984	2	1	1	0	0	0	0	0	0	0.0098	N	0	TRUE	FALSE
BRD-A19195498	trimipramine	adrenergic transmitter uptake inhibitor|dopamine receptor|norepinephrine transporter inhibitor|serotonin transporter (SERT) inhibitor|serotonin uptake inhibitor|tricyclic antidepressant|tricyclic antidepressant (TCA), SLC6A2|SLC6A4|SLC6A3|ADRA1A|ADRA1B|ADRA2A|ADRA2B|ADRB1|ADRB2|ADRB3|CHRM1|CHRM2|CHRM3|CHRM4|CHRM5|DRD1|DRD2|DRD5|HRH1|HTR1A|HTR1D|HTR2A|HTR2C|HTR3A	775	CACNA1C	calcium voltage-gated channel subunit alpha1 C	pQSAR	0.8361	0.9123	0.9123	0.1989	0.5	0.5	0.9984	2	1	1	0	0	0	0	0	0	0.0056	N	0	TRUE	FALSE
BRD-A30437061	camptothecin	topoisomerase inhibitor|beta amyloid synthesis inhibitor|hypoxia inducible factor inhibitor, TOP1|HIF1A	3066	HDAC2	histone deacetylase 2	pQSAR	0.9003	0.8987	0.8987	0.1989	0.5	0.6302	0.9984	2	1	1	0	0	0	0	0	0	0.0012	N	0	TRUE	FALSE
BRD-A34806832	proscillaridin	ATPase inhibitor, ATP1A1	481	ATP1B1	ATPase Na+/K+ transporting subunit beta 1	NCI60	0.382	0.9518	0.9571	0.6079	0.5434	0.8223	0.9984	3	0	1	1	0	0	0	0	0	0.6292	N	0	FALSE	TRUE
BRD-A35588707	teniposide	topoisomerase inhibitor|DNA inhibitor|DNA repair enzyme inhibitor|mitotic inhibitor, TOP2A|CYP3A5	3551	IKBKB	inhibitor of nuclear factor kappa B kinase subunit beta	pQSAR	0.9062	0.8974	0.8974	0.1379	0.5	0.4846	0.9984	2	1	1	0	0	0	0	0	0	0.001	N	0	TRUE	FALSE
BRD-A43974575	tranylcypromine	cytochrome P450 inhibitor|histone lysine demethylase inhibitor|monoamine oxidase inhibitor, MAOA|MAOB|KDM1A|CYP2A6	4128	MAOA	monoamine oxidase A	Known	0.6425	0.9342	0.9772	0.9908	0.5	0.5	0.9984	8	0	1	0	0	1	1	0	1	0.0865	Y	1	FALSE	TRUE
BRD-A44008656	doxylamine	histamine receptor antagonist, HRH1|CHRM1	3269	HRH1	histamine receptor H1	Known	0.7375	0.9262	0.9466	0.6121	0.5	0.5	0.9984	8	0	1	0	0	0	0	0	1	0.0275	Y	1	FALSE	TRUE
BRD-A45664787	iloprost	platelet aggregation inhibitor|prostanoid receptor agonist|prostacyclin analog, PTGIR|PTGER1|PTGER2|PDE4A|PDE4B|PDE4C|PDE4D|PLAT|PTGDR|PTGER3|PTGER4|PTGFR|TBXA2R	6915	TBXA2R	thromboxane A2 receptor	Known	0.5863	0.9389	0.9523	0.7724	0.5	0.5	0.9984	8	0	1	0	0	0	0	0	1	0.1525	Y	1	FALSE	TRUE
BRD-A61304759	tanespimycin	HSP inhibitor|CHK inhibitor|HSP antagonist, HSP90AA1|CHEK1	7846	TUBA1A	tubulin alpha 1a	pQSAR	0.884	0.9041	0.9041	0.146	0.5	0.6305	0.9984	2	1	1	0	0	0	0	0	0	0.0019	N	0	TRUE	FALSE
BRD-A62428732	hydroxyzine	histamine receptor antagonist, HRH1	3269	HRH1	histamine receptor H1	Known	0.5885	0.939	0.9478	0.8207	0.5	0.5	0.9984	8	0	1	0	0	1	0	1	1	0.1493	Y	1	FALSE	TRUE
BRD-A72988804	tiaprofenic-acid	cyclooxygenase inhibitor, PTGS2|PTGS1	1786	DNMT1	DNA methyltransferase 1	pQSAR	0.946	0.8788	0.8788	0.3381	0.5	0.5	0.9984	2	1	1	0	0	0	0	0	0	0.0002	N	0	TRUE	FALSE
BRD-A73635141	hydrocortisone	corticosteroid agonist|glucocorticoid receptor agonist|immunosuppressant|interleukin receptor antagonist, ANXA1|NOS2|NR3C1|NR3C2	190	NR0B1	nuclear receptor subfamily 0 group B member 1	NCI60	0.6344	0.9355	0.9355	0.5021	0.5	0.8862	0.9984	3	0	1	1	0	0	0	0	0	0.0943	N	0	FALSE	TRUE
BRD-A78391468	prednisolone	glucocorticoid receptor agonist, NR3C1|NR3C2|SERPINA6	866	SERPINA6	serpin family A member 6	Known	0.6965	0.9296	0.9629	0.9031	0.5	0.5	0.9984	8	0	1	0	0	1	0	0	1	0.0466	Y	1	FALSE	TRUE
BRD-A79803969	memantine	glutamate receptor antagonist|glutamate release inhibitor, GRIN1|CHRFAM7A|CYP2E1|DRD2|GRIN2A|GRIN2B|GRIN3A|HTR3A	2908	NR3C1	nuclear receptor subfamily 3 group C member 1	pQSAR	0.9259	0.8905	0.8905	0.1081	0.5	0.5	0.9984	2	1	1	0	0	0	0	0	0	0.0005	N	0	TRUE	FALSE
BRD-K01014769	isoflupredone	glucocorticoid receptor agonist, NR3C1	866	SERPINA6	serpin family A member 6	StructureLikely	0.6704	0.9322	0.9633	0.8017	0.5	0.5	0.9984	5	0	1	0	0	1	0	0	0	0.0634	N	0	FALSE	TRUE
BRD-K01663662	diphenidol	acetylcholine receptor ligand, CHRM1|CHRM3|CHRM4|CHRM2	150	ADRA2A	adrenoceptor alpha 2A	pQSAR	0.8428	0.9114	0.9114	0.2312	0.5	0.5	0.9984	2	1	1	0	0	0	0	0	0	0.0049	N	0	TRUE	FALSE
BRD-K08115555	tyrphostin-AG-1288	catechol O methyltransferase inhibitor|tumor necrosis factor inhibitor, COMT	5743	PTGS2	prostaglandin-endoperoxide synthase 2	pQSAR	0.8199	0.9162	0.9162	0.2096	0.5	0.5	0.9984	2	1	1	0	0	0	0	0	0	0.0076	N	0	TRUE	FALSE
BRD-K08619574	thioproperazine	dopamine receptor antagonist, ADRA1A|ADRA1B|DRD1|DRD2|HTR1A|HTR2A	2568	GABRP	gamma-aminobutyric acid type A receptor subunit pi	pQSAR	0.8003	0.9195	0.9195	0.1733	0.5	0.5	0.9984	2	1	1	0	0	0	0	0	0	0.0107	N	0	TRUE	FALSE
BRD-K10042277	desmethylclozapine	acetylcholine receptor agonist|dopamine receptor agonist|dopamine receptor antagonist|dopamine receptor partial agonist|serotonin receptor antagonist|serotonin receptor inverse agonist, CHRM1|DRD2|DRD3|HTR2A	1128	CHRM1	cholinergic receptor muscarinic 1	Known	0.7021	0.9299	0.9561	0.9176	0.5	0.5	0.9984	8	0	1	0	0	1	0	1	1	0.0435	Y	1	FALSE	TRUE
BRD-K19477839	SGX523	hepatocyte growth factor receptor inhibitor, MET	4233	MET	MET proto-oncogene, receptor tyrosine kinase	Known	0.7965	0.9187	0.9435	0.8044	0.5	0.5	0.9984	8	0	1	0	0	1	0	1	1	0.0114	Y	1	FALSE	TRUE
BRD-K30207000	dexamethasone	glucocorticoid receptor agonist|corticosteroid agonist|immunosuppressant, ANXA1|CYP3A4|CYP3A5|NOS2|NR0B1|NR3C1|NR3C2	2908	NR3C1	nuclear receptor subfamily 3 group C member 1	Known	0.534	0.9423	0.9772	0.9908	0.5	0.5	0.9984	8	0	1	0	0	1	1	0	1	0.2422	Y	1	FALSE	TRUE
BRD-K31471398	dihydrexidine	dopamine receptor agonist, DRD1|DRD2|DRD3|DRD4|DRD5	1812	DRD1	dopamine receptor D1	Known	0.7581	0.9239	0.9489	0.6606	0.5	0.5	0.9984	8	0	1	0	0	0	0	0	1	0.0206	Y	1	FALSE	TRUE
BRD-K36616567	doxepin	histamine receptor antagonist|adrenergic transmitter uptake inhibitor|histamine receptor inhibitor|norepinephrine reputake inhibitor|serotonin reuptake inhibitor|tricyclic antidepressant, HRH1|HRH2|SLC6A2|SLC6A4|ADRA1A|ADRA1B|ADRA1D|ADRA2A|ADRA2B|ADRA2C|CHRM1|CHRM2|CHRM3|CHRM4|CHRM5|CYP2C19|DRD2|HRH4|HTR1A|HTR2A|HTR2B|HTR2C|HTR6|KCNH2|SLC6A3	3358	HTR2C	5-hydroxytryptamine receptor 2C	Known	0.3797	0.9516	0.9756	0.9908	0.5	0.5	0.9984	8	0	1	0	0	1	1	1	1	0.6355	Y	1	FALSE	TRUE
BRD-K37846922	3,3'-diindolylmethane	androgen receptor antagonist|aryl hydrocarbon receptor agonist|beta glucuronidase inhibitor|CHK inhibitor|cytochrome P450 activator|indoleamine 2,3-dioxygenase inhibitor, AHR|AR|CYP1A2|GUSB|IDO1	4128	MAOA	monoamine oxidase A	pQSAR	0.8699	0.9072	0.9072	0.4824	0.5	0.5	0.9984	2	1	1	0	0	0	0	0	0	0.0027	N	0	TRUE	FALSE
BRD-K43797669	genistein	tyrosine kinase inhibitor|angiogenesis inhibitor|CFTR channel activator|EGFR inhibitor|estrogen receptor agonist|histidine kinase inhibitor|immunosuppressant|isoflavone agonist|protein tyrosine kinase inhibitor|reducing agent|topoisomerase inhibitor, CFTR|ESR2|EGFR|ESR1|ESRRA|ESRRB|ESRRG|NCOA1|NCOA2|PPARG|PTK2B|TOP2A|TRPC5	2099	ESR1	estrogen receptor 1	Known	0.738	0.9262	0.9262	0.7347	0.5	0.5	0.9984	8	0	1	0	0	0	0	0	1	0.0273	Y	1	FALSE	TRUE
BRD-K47029922	tranylcypromine	cytochrome P450 inhibitor|histone lysine demethylase inhibitor|monoamine oxidase inhibitor, MAOA|MAOB|KDM1A|CYP2A6	4128	MAOA	monoamine oxidase A	Known	0.6752	0.9327	0.9771	0.9908	0.5	0.5	0.9984	8	0	1	0	0	1	1	0	1	0.06	Y	1	FALSE	TRUE
BRD-K47983010	BX-795	IKK inhibitor|PDK1 inhibitor|phosphoinositide dependent kinase inhibitor|serine/threonine kinase inhibitor|TBK1 inhibitor, PDPK1|CDK2|CHEK1|GSK3B|IKBKE|KDR|PDK1|TBK1	6790	AURKA	aurora kinase A	pIC50	0.9168	0.8938	0.8938	0.4752	0.5	0.5	0.9984	7	1	1	0	0	0	0	1	0	0.0007	N	0	TRUE	TRUE
BRD-K48578705	methyldopa	adrenergic receptor agonist, DDC|ADRA2A	5566	PRKACA	protein kinase cAMP-activated catalytic subunit alpha	pQSAR	0.8684	0.9075	0.9075	0.1773	0.5	0.5	0.9984	2	1	1	0	0	0	0	0	0	0.0028	N	0	TRUE	FALSE
BRD-K53737926	amitriptyline	norepinephrine inhibitor|serotonin receptor inhibitor|sigma receptor inhibitor, CHRM1|CHRM2|CHRM3|CHRM4|CHRM5|HRH1|HTR6|SLC6A2|SLC6A4|ADRA1A|ADRA1B|ADRA1D|ADRA2A|ADRB1|ADRB2|ADRB3|HRH2|HRH4|HTR1A|HTR1B|HTR1D|HTR2A|HTR2C|HTR7|KCNA1|KCND2|KCND3|KCNQ2|KCNQ3|NTRK1|NTRK2|OPRD1|OPRK1|OPRM1|SIGMAR1	3358	HTR2C	5-hydroxytryptamine receptor 2C	Known	0.293	0.9572	0.9682	0.8273	0.5	0.5	0.9984	8	0	1	0	0	1	0	1	1	0.8334	Y	1	FALSE	TRUE
BRD-K56064827	EI-273	PKC inhibitor, PRKCA|PRKCG	506	ATP5F1B	ATP synthase F1 subunit beta	pQSAR	0.8398	0.9133	0.9133	0.1419	0.5	0.5	0.9984	2	1	1	0	0	0	0	0	0	0.0052	N	0	TRUE	FALSE
BRD-K57875380	asenapine	dopamine receptor antagonist|serotonin receptor antagonist, DRD2|HTR2A|DRD1|HRH1|HTR1A|HTR1B|ADRA1A|ADRA2A|ADRA2B|ADRA2C|ADRB1|ADRB2|DRD3|DRD4|HRH2|HTR1D|HTR1E|HTR2B|HTR2C|HTR5A|HTR6|HTR7	152	ADRA2C	adrenoceptor alpha 2C	Known	0.7474	0.926	0.926	0.6321	0.5	0.5	0.9984	8	0	1	0	0	0	0	0	1	0.024	Y	1	FALSE	TRUE
BRD-K60640630	mometasone	glucocorticoid receptor agonist|immunosuppressant, NR3C1	1577	CYP3A5	cytochrome P450 family 3 subfamily A member 5	StructureLikely	0.6864	0.9312	0.9584	0.824	0.5	0.5	0.9984	5	0	1	0	0	1	0	0	0	0.0526	N	0	FALSE	TRUE
BRD-K60762818	desipramine	norepinephrine transporter inhibitor|Sodium Channel Blockers|tricyclic antidepressant (TCA), SLC6A2|SLC6A4|ADRA1A|ADRA1B|ADRA1D|ADRA2A|ADRA2B|ADRA2C|ADRB1|ADRB2|CHRM1|CHRM2|CHRM3|CHRM4|CHRM5|DRD2|HRH1|HTR1A|HTR2A|HTR2C|SMPD1	775	CACNA1C	calcium voltage-gated channel subunit alpha1 C	pQSAR	0.8903	0.9011	0.9011	0.1531	0.5	0.5	0.9984	2	1	1	0	0	0	0	0	0	0.0016	N	0	TRUE	FALSE
BRD-K64931368	aminocaproic-acid	plasmin inhibitor|plasminogen activator inhibitor, PLG|PLAT|LPA	5564	PRKAB1	protein kinase AMP-activated non-catalytic subunit beta 1	pQSAR	0.8236	0.9149	0.9149	0.1202	0.5	0.5	0.9984	2	1	1	0	0	0	0	0	0	0.0071	N	0	TRUE	FALSE
BRD-K75295174	alisertib	Aurora kinase inhibitor|mitotic inhibitor|protein kinase inhibitor, AURKA	25	ABL1	ABL proto-oncogene 1, non-receptor tyrosine kinase	pIC50	0.8079	0.9171	0.9171	0.3933	0.5	0.5	0.9984	7	1	1	0	0	0	0	1	0	0.0094	N	0	TRUE	TRUE
BRD-K81418486	vorinostat	HDAC inhibitor|cell cycle inhibitor, HDAC1|HDAC2|HDAC3|HDAC6|HDAC8|HDAC10|HDAC11|HDAC5|HDAC9	3066	HDAC2	histone deacetylase 2	Known	0.7098	0.9289	0.9289	0.7156	0.8192	0.7087	0.9984	8	0	1	0	1	0	0	0	1	0.0395	Y	1	FALSE	TRUE
BRD-K88741031	methyl-2,5-dihydroxycinnamate	EGFR inhibitor|tyrosine kinase inhibitor, EGFR	595	CCND1	cyclin D1	pQSAR	0.8067	0.9183	0.9183	0.538	0.5	0.5	0.9984	2	1	1	0	0	0	0	0	0	0.0096	N	0	TRUE	FALSE
BRD-K90543092	levonorgestrel	estrogen receptor agonist|glucocorticoid receptor antagonist|progesterone receptor agonist|progesterone receptor antagonist, PGR|AR|CYP2E1|ESR1|SRD5A1	367	AR	androgen receptor	Known	0.5881	0.9386	0.977	0.9908	0.5	0.5	0.9984	8	0	1	0	0	1	1	1	1	0.1499	Y	1	FALSE	TRUE
BRD-K93034159	cladribine	adenosine deaminase inhibitor|antimetabolite|DNA synthesis inhibitor|immunosuppressant|ribonucleotide reductase inhibitor, ADA|PNP|POLA1|POLE|POLE2|POLE3|POLE4|RRM1|RRM2|RRM2B	6241	RRM2	ribonucleotide reductase regulatory subunit M2	Known	0.8448	0.9119	0.944	0.8044	0.5	0.8007	0.9984	8	1	1	1	0	1	0	0	1	0.0047	Y	1	TRUE	TRUE
BRD-A13122391	triptolide	RNA polymerase inhibitor, CYP2C19|RELA	1017	CDK2	cyclin dependent kinase 2	pQSAR	0.8214	0.9143	0.9143	0.1338	0.6819	0.6466	0.9983	2	1	1	0	0	0	0	0	0	0.0074	N	0	TRUE	FALSE
BRD-A16478930	amcinonide	corticosteroid agonist|cytochrome P450 inhibitor|glucocorticoid receptor agonist|immunosuppressant, NR3C1|ANXA1	1577	CYP3A5	cytochrome P450 family 3 subfamily A member 5	StructureLikely	0.776	0.9205	0.9661	0.8465	0.5	0.5	0.9983	5	0	1	0	0	1	0	0	0	0.0158	N	0	FALSE	TRUE
BRD-A17462676	bambuterol	adrenergic receptor agonist, ADRB2|BCHE|CYP2D6	154	ADRB2	adrenoceptor beta 2	Known	0.7298	0.9252	0.9252	0.6878	0.5	0.5	0.9983	8	0	1	0	0	0	0	0	1	0.0305	Y	1	FALSE	TRUE
BRD-A27887842	prednisolone	glucocorticoid receptor agonist, NR3C1|NR3C2|SERPINA6	866	SERPINA6	serpin family A member 6	Known	0.6401	0.9337	0.969	0.9908	0.5	0.5	0.9983	8	0	1	0	0	1	1	0	1	0.0887	Y	1	FALSE	TRUE
BRD-A35033682	eriodictyol	cytochrome P450 inhibitor|TRPM3 antagonist|xanthine oxidase inhibitor, CYP1B1|NFE2L2|XDH	3551	IKBKB	inhibitor of nuclear factor kappa B kinase subunit beta	pQSAR	0.946	0.876	0.876	0.2204	0.5	0.5	0.9983	2	1	1	0	0	0	0	0	0	0.0002	N	0	TRUE	FALSE
BRD-A45664787	iloprost	platelet aggregation inhibitor|prostanoid receptor agonist|prostacyclin analog, PTGIR|PTGER1|PTGER2|PDE4A|PDE4B|PDE4C|PDE4D|PLAT|PTGDR|PTGER3|PTGER4|PTGFR|TBXA2R	5734	PTGER4	prostaglandin E receptor 4	Known	0.5754	0.9389	0.9523	0.7724	0.5	0.5	0.9983	8	0	1	0	0	0	0	0	1	0.1688	Y	1	FALSE	TRUE
BRD-A49225603	alimemazine	histamine receptor ligand, HRH1	150	ADRA2A	adrenoceptor alpha 2A	pIC50	0.5741	0.9386	0.9604	0.8734	0.5	0.5	0.9983	7	0	1	0	0	1	0	1	0	0.1709	N	0	FALSE	TRUE
BRD-A55393291	testosterone	androgen receptor (AR) agonist|androgen receptor agonist|testosterone receptor agonist, AR|CYP19A1|CYP2C19|CYP2C8|CYP3A5	2908	NR3C1	nuclear receptor subfamily 3 group C member 1	StructureLikely	0.7348	0.9242	0.9639	0.8332	0.5	0.5	0.9983	5	0	1	0	0	1	0	0	0	0.0285	N	0	FALSE	TRUE
BRD-A56245458	reichstein	androgen receptor antagonist, AR	367	AR	androgen receptor	Known	0.6739	0.931	0.9658	0.8398	0.5	0.5	0.9983	8	0	1	0	0	1	0	0	1	0.0609	Y	1	FALSE	TRUE
BRD-A58753560	budesonide	glucocorticoid receptor agonist|glucocordicoid receptor antagonist|immunosuppressant, NR3C1|CYP3A5|CYP3A7	1577	CYP3A5	cytochrome P450 family 3 subfamily A member 5	Known	0.5427	0.9411	0.977	0.9908	0.5	0.5	0.9983	8	0	1	0	0	1	1	0	1	0.2253	Y	1	FALSE	TRUE
BRD-A98431941	ephedrine	adrenergic receptor agonist, ACHE|ADRA1A|ADRB2|SLC18A2|SLC6A2	2099	ESR1	estrogen receptor 1	pQSAR	0.8061	0.9159	0.9159	0.1531	0.5	0.5	0.9983	2	1	1	0	0	0	0	0	0	0.0097	N	0	TRUE	FALSE
BRD-K01663662	diphenidol	acetylcholine receptor ligand, CHRM1|CHRM3|CHRM4|CHRM2	1128	CHRM1	cholinergic receptor muscarinic 1	Known	0.7441	0.9234	0.9568	0.7376	0.5	0.5	0.9983	8	0	1	0	0	0	0	0	1	0.0251	Y	1	FALSE	TRUE
BRD-K02265150	amoxapine	adrenergic transmitter uptake inhibitor|dopamine receptor|norepinephrine reputake inhibitor|serotonin receptor antagonist|serotonin reuptake inhibitor|serotonin uptake inhibitor|tricyclic antidepressant, SLC6A2|SLC6A4|HTR2A|HTR6|ADRA1A|ADRA1B|ADRA1D|ADRA2A|ADRA2B|ADRA2C|CHRM1|CHRM2|CHRM3|CHRM4|CHRM5|DRD1|DRD2|DRD3|DRD4|GABRA1|GABRA2|GABRA3|GABRA4|GABRA5|GABRA6|GABRB1|GABRB2|GABRB3|GABRD|GABRE|GAB…	3269	HRH1	histamine receptor H1	Known	0.6656	0.9308	0.9584	0.9092	0.5	0.5	0.9983	8	0	1	0	0	1	0	1	1	0.067	Y	1	FALSE	TRUE
BRD-K02404261	caffeine	adenosine receptor antagonist|ATM kinase inhibitor|ATR kinase inhibitor, ADORA1|ADORA2A|ADORA2B|ATM|ITPR1|RYR1|ADORA3|ATR|ITPR2|ITPR3|PDE10A|PDE11A|PDE1A|PDE1B|PDE1C|PDE2A|PDE3A|PDE3B|PDE4A|PDE4B|PDE4C|PDE4D|PDE5A|PDE6A|PDE6B|PDE6C|PDE7A|PDE7B|PDE8A|PDE8B|PDE9A|PIK3CA|PIK3CB|PIK3CD|PRKDC|RYR2|RYR3	7153	TOP2A	DNA topoisomerase II alpha	pQSAR	0.8229	0.914	0.914	0.3497	0.5	0.5	0.9983	2	1	1	0	0	0	0	0	0	0.0072	N	0	TRUE	FALSE
BRD-K07325606	hispidin	beta secretase inhibitor|cyclooxygenase inhibitor|HIV integrase inhibitor|PKC inhibitor|prolyl endopeptidase inhibitor|xanthine oxidase inhibitor, PREP|PRKCB|PTGS2|XDH	6300	MAPK12	mitogen-activated protein kinase 12	pQSAR	0.9062	0.8956	0.8956	0.1733	0.5	0.5	0.9983	2	1	1	0	0	0	0	0	0	0.001	N	0	TRUE	FALSE
BRD-K08547377	irinotecan	topoisomerase inhibitor, TOP1|CYP3A5|TOP1MT	3326	HSP90AB1	heat shock protein 90 alpha family class B member 1	pQSAR	0.8626	0.9058	0.9058	0.146	0.5	0.4174	0.9983	2	1	1	0	0	0	0	0	0	0.0032	N	0	TRUE	FALSE
BRD-K18757346	U-46619	thromboxane receptor agonist, PTGDR|PTGDR2|PTGER1|PTGER2|PTGER3|PTGER4|PTGFR|PTGIR|TBXA2R	5737	PTGFR	prostaglandin F receptor	Known	0.5605	0.9389	0.963	0.7724	0.5	0.5	0.9983	8	0	1	0	0	0	0	0	1	0.1931	Y	1	FALSE	TRUE
BRD-K25433859	maprotiline	norepinephrine reputake inhibitor|tricyclic antidepressant (TCA), SLC6A2|ADRA1A|ADRA1B|ADRA1D|ADRA2A|ADRA2B|ADRA2C|CHRM1|CHRM2|CHRM3|CHRM4|CHRM5|DRD2|HRH1|HTR2A|HTR2C|HTR7	150	ADRA2A	adrenoceptor alpha 2A	Known	0.6302	0.9342	0.9342	0.9908	0.5	0.5	0.9983	8	0	1	0	0	1	1	0	1	0.0985	Y	1	FALSE	TRUE
BRD-K25433859	maprotiline	norepinephrine reputake inhibitor|tricyclic antidepressant (TCA), SLC6A2|ADRA1A|ADRA1B|ADRA1D|ADRA2A|ADRA2B|ADRA2C|CHRM1|CHRM2|CHRM3|CHRM4|CHRM5|DRD2|HRH1|HTR2A|HTR2C|HTR7	152	ADRA2C	adrenoceptor alpha 2C	Known	0.6356	0.9342	0.9342	0.9908	0.5	0.5	0.9983	8	0	1	0	0	1	1	0	1	0.0931	Y	1	FALSE	TRUE
BRD-K28687144	fosfosal	phosphodiesterase inhibitor, PDE4A|PDE4B|PDE4C|PDE4D|PTGS1|PTGS2	2224	FDPS	farnesyl diphosphate synthase	pQSAR	0.8343	0.9119	0.9119	0.1143	0.5	0.5	0.9983	2	1	1	0	0	0	0	0	0	0.0058	N	0	TRUE	FALSE
BRD-K28761384	zuclopenthixol	dopamine receptor antagonist, DRD2|DRD1|ADRA1A|ADRA2A|DRD5|HRH1|HTR2A	3269	HRH1	histamine receptor H1	Known	0.591	0.9372	0.9609	0.9908	0.5	0.5	0.9983	8	0	1	0	0	1	1	1	1	0.1459	Y	1	FALSE	TRUE
BRD-K28936863	ketotifen	histamine receptor ligand|leukotriene antagonist|phosphodiesterase inhibitor, HRH1|PDE4A|PDE4B|PDE4C|PDE4D|PDE7A|PDE7B|PDE8A|PDE8B|PGD	154	ADRB2	adrenoceptor beta 2	pQSAR	0.8043	0.9169	0.9169	0.3613	0.5	0.5	0.9983	2	1	1	0	0	0	0	0	0	0.01	N	0	TRUE	FALSE
BRD-K35189033	levonorgestrel	estrogen receptor agonist|glucocorticoid receptor antagonist|progesterone receptor agonist|progesterone receptor antagonist, PGR|AR|CYP2E1|ESR1|SRD5A1	367	AR	androgen receptor	Known	0.5907	0.9378	0.977	0.9908	0.5	0.5	0.9983	8	0	1	0	0	1	1	1	1	0.1463	Y	1	FALSE	TRUE
BRD-K37264083	levisoprenaline	adrenergic receptor agonist, ADRB1|ADRB2	154	ADRB2	adrenoceptor beta 2	Known	0.457	0.9464	0.9771	0.9908	0.5	0.5	0.9983	8	0	1	0	0	1	1	0	1	0.4241	Y	1	FALSE	TRUE
BRD-K37792168	denbufylline	phosphodiesterase inhibitor, PDE4A|PDE4B|PDE4D	135	ADORA2A	adenosine A2a receptor	pQSAR	0.826	0.9133	0.9365	0.6747	0.5	0.5	0.9983	2	1	1	0	0	0	0	0	0	0.0068	N	0	TRUE	FALSE
BRD-K39915878	loxapine	dopamine receptor antagonist|serotonin receptor antagonist|dopamine receptor ligand, DRD2|DRD3|DRD4|DRD1|HRH1|HTR2A|HTR2C|HTR6|ADRA1A|ADRA1B|ADRA2A|ADRA2B|ADRA2C|ADRB1|CHRM1|CHRM2|CHRM3|CHRM4|CHRM5|DRD5|HRH2|HRH4|HTR1A|HTR1B|HTR1D|HTR1E|HTR3A|HTR5A|HTR7|SLC6A2|SLC6A3|SLC6A4	152	ADRA2C	adrenoceptor alpha 2C	Known	0.4049	0.949	0.9611	0.9092	0.5	0.5	0.9983	8	0	1	0	0	1	0	1	1	0.5671	Y	1	FALSE	TRUE
BRD-K41260949	valproic-acid	HDAC inhibitor|ABAT inhibitor|GABA receptor agonist|GABAergic transmission enhancer|voltage-gated sodium channel blocker, ABAT|HDAC1|SCN1A|SCN3A|ACADSB|ALDH5A1|HDAC2|HDAC9|OGDH|SCN10A|SCN11A|SCN1B|SCN2A|SCN2B|SCN3B|SCN4A|SCN4B|SCN5A|SCN7A|SCN8A|SCN9A	3551	IKBKB	inhibitor of nuclear factor kappa B kinase subunit beta	pQSAR	0.8111	0.9162	0.9162	0.4608	0.5	0.566	0.9983	2	1	1	0	0	0	0	0	0	0.0089	N	0	TRUE	FALSE
BRD-K43736954	cortisone	glucocorticoid receptor agonist, NR3C1	2908	NR3C1	nuclear receptor subfamily 3 group C member 1	Known	0.5279	0.9419	0.977	0.9908	0.5	0.5	0.9983	8	0	1	0	0	1	1	0	1	0.2547	Y	1	FALSE	TRUE
BRD-K43736954	cortisone	glucocorticoid receptor agonist, NR3C1	367	AR	androgen receptor	StructureLikely	0.5345	0.9419	0.9686	0.9031	0.5	0.5	0.9983	5	0	1	0	0	1	0	0	0	0.2413	N	0	FALSE	TRUE
BRD-K50168500	canertinib	EGFR inhibitor|EGFR antagonist|receptor tyrosine protein kinase inhibitor|tyrosine kinase inhibitor, EGFR|ERBB2|ERBB4|AKT1	1956	EGFR	epidermal growth factor receptor	Known	0.8881	0.8991	0.954	0.814	0.5982	0.5	0.9983	8	1	1	0	0	1	0	0	1	0.0017	Y	1	TRUE	TRUE
BRD-K52911425	GDC-0941	PI3K inhibitor, PIK3CG|PIK3CA|PIK3CB|PIK3CD	2475	MTOR	mechanistic target of rapamycin kinase	pIC50	0.946	0.8769	0.8769	0.3613	0.5	0.5	0.9983	7	1	1	0	0	0	0	1	0	0.0002	N	0	TRUE	TRUE
BRD-K53737926	amitriptyline	norepinephrine inhibitor|serotonin receptor inhibitor|sigma receptor inhibitor, CHRM1|CHRM2|CHRM3|CHRM4|CHRM5|HRH1|HTR6|SLC6A2|SLC6A4|ADRA1A|ADRA1B|ADRA1D|ADRA2A|ADRB1|ADRB2|ADRB3|HRH2|HRH4|HTR1A|HTR1B|HTR1D|HTR2A|HTR2C|HTR7|KCNA1|KCND2|KCND3|KCNQ2|KCNQ3|NTRK1|NTRK2|OPRD1|OPRK1|OPRM1|SIGMAR1	150	ADRA2A	adrenoceptor alpha 2A	Known	0.4197	0.9481	0.9682	0.8273	0.5	0.5	0.9983	8	0	1	0	0	1	0	0	1	0.5261	Y	1	FALSE	TRUE
BRD-K56810756	fomepizole	alcohol dehydrogenase inhibitor, ADH1A|ADH1B|ADH1C|AKR1A1|CAT	1432	MAPK14	mitogen-activated protein kinase 14	pQSAR	0.8626	0.9059	0.9059	0.1264	0.5	0.5	0.9983	2	1	1	0	0	0	0	0	0	0.0032	N	0	TRUE	FALSE
BRD-K59720958	finasteride	5 alpha reductase inhibitor|androgen receptor antagonist|steroid 5alpha-reductase inhibitor, SRD5A2|SRD5A1|AKR1D1|AR	2908	NR3C1	nuclear receptor subfamily 3 group C member 1	pQSAR	0.8361	0.9114	0.9127	0.5595	0.5	0.5	0.9983	2	1	1	0	0	0	0	0	0	0.0056	N	0	TRUE	FALSE
BRD-K63675182	triflupromazine	acetylcholine receptor ligand|dopamine receptor, HTR2B|CHRM1|CHRM2|CHRNA7|DRD1|DRD2	1131	CHRM3	cholinergic receptor muscarinic 3	StructureLikely	0.511	0.9428	0.9567	0.8332	0.5	0.5	0.9983	5	0	1	0	0	1	0	0	0	0.2908	N	0	FALSE	TRUE
BRD-K70487031	flupentixol	dopamine receptor antagonist, DRD2|DRD1|ADRA1A|CHRM1|DRD3|DRD5|HTR2A	1131	CHRM3	cholinergic receptor muscarinic 3	pQSAR	0.8055	0.9164	0.9329	0.6712	0.5	0.5	0.9983	2	1	1	0	0	0	0	0	0	0.0098	N	0	TRUE	FALSE
BRD-K73947551	amifostine	free radical scavenger|oxygen scavenger|reducing agent, ALPPL2|ENPP1	5564	PRKAB1	protein kinase AMP-activated non-catalytic subunit beta 1	pQSAR	0.813	0.9156	0.9156	0.1159	0.5	0.5	0.9983	2	1	1	0	0	0	0	0	0	0.0086	N	0	TRUE	FALSE
BRD-K74927006	cinnarizine	calcium ion channel antagonist|histamine receptor antagonist, HRH1|CACNA1C|CACNA1D|CACNA1F|CACNA1G|CACNA1H|CACNA1I|CACNA1S|CHRM1|CHRM2|CHRM3|CHRM4|CHRM5|DRD1|DRD2|DRD5	6335	SCN9A	sodium voltage-gated channel alpha subunit 9	pQSAR	0.9259	0.8882	0.8882	0.1652	0.5	0.5	0.9983	2	1	1	0	0	0	0	0	0	0.0005	N	0	TRUE	FALSE
BRD-K77947974	fluspirilene	dopamine receptor|dopamine receptor antagonist, DRD2|HTR2A|CACNG1|HRH1|HTR1A|HTR1D|HTR1E	3269	HRH1	histamine receptor H1	Known	0.7965	0.9174	0.9335	0.6571	0.5	0.7974	0.9983	8	0	1	0	0	0	0	1	1	0.0114	Y	1	FALSE	TRUE
BRD-K80725632	lavendustin-c	epidermal growth factor receptor (EGFR) inhibitor, CAMK2A|EGFR|SRC	5468	PPARG	peroxisome proliferator activated receptor gamma	pQSAR	0.8178	0.9143	0.9351	0.6489	0.5	0.5	0.9983	2	1	1	0	0	0	0	0	0	0.0079	N	0	TRUE	FALSE
BRD-K82624463	prednisone	glucocorticoid receptor agonist, NR3C1|HSD11B1	866	SERPINA6	serpin family A member 6	StructureLikely	0.7116	0.9276	0.9641	0.8365	0.5	0.5	0.9983	5	0	1	0	0	1	0	0	0	0.0386	N	0	FALSE	TRUE
BRD-K83597974	pargyline	monoamine oxidase inhibitor, MAOB|MAOA	4128	MAOA	monoamine oxidase A	Known	0.6954	0.9284	0.9437	0.6983	0.5	0.5	0.9983	8	0	1	0	0	0	0	0	1	0.0472	Y	1	FALSE	TRUE
BRD-K89104321	gaboxadol	GABA receptor agonist|GABA receptor partial agonist, GABRD|GABRA1|GABRA2|GABRA3|GABRA4|GABRA5|GABRA6|GABRR1|GABRR2|GABRR3	847	CAT	catalase	pQSAR	0.9003	0.8975	0.8975	0.1081	0.5	0.5	0.9983	2	1	1	0	0	0	0	0	0	0.0012	N	0	TRUE	FALSE
BRD-K91511962	desoxycortone	mineralocorticoid receptor agonist, NR3C1|NR3C2	2908	NR3C1	nuclear receptor subfamily 3 group C member 1	Known	0.6302	0.9342	0.9772	0.9908	0.5	0.5	0.9983	8	0	1	0	0	1	1	0	1	0.0985	Y	1	FALSE	TRUE
BRD-K96778649	tyrphostin-47	EGFR inhibitor|epidermal growth factor receptor (EGFR) inhibitor, EGFR	6715	SRD5A1	steroid 5 alpha-reductase 1	NCI60	0.6532	0.9323	0.9323	0.4398	0.5	0.8031	0.9983	3	0	1	1	0	0	0	0	0	0.077	N	0	FALSE	TRUE
BRD-K97309399	thiothixene	dopamine receptor|dopamine receptor antagonist, HTR2A|DRD1|DRD2|HRH1	1812	DRD1	dopamine receptor D1	Known	0.5861	0.938	0.9593	0.7724	0.5	0.6477	0.9983	8	0	1	0	0	0	0	0	1	0.1528	Y	1	FALSE	TRUE
BRD-K97399794	quercetin	aldose reductase inhibitor|cytokine production inhibitor|EGFR inhibitor|glucosidase inhibitor|monoamine oxidase inhibitor|polar auxin transport inhibitor|quorum sensing signaling modulator|SIRT activator|sodium channel blocker|tyrosine phosphatase inhibitor|xanthine oxidase inhibitor, PIK3CG|AKR1B1|ATP5A1|ATP5B|ATP5C1|CYP2C8|EGFR|GAA|HCK|HIBCH|MAOA|PIM1|PTPN1|SCN5A|SIRT1|STK17B|UGT3A1|XDH	1956	EGFR	epidermal growth factor receptor	Known	0.8765	0.9031	0.9428	0.6983	0.5	0.5	0.9983	8	1	1	0	0	0	0	0	1	0.0023	Y	1	TRUE	TRUE
BRD-K97951054	BRD-K97951054	Aurora kinase inhibitor|Pim kinase inhibitor|VEGFR inhibitor, AURKB|KDR|PIM1	1956	EGFR	epidermal growth factor receptor	pQSAR	0.8549	0.9074	0.9427	0.6205	0.5	0.5	0.9983	2	1	1	0	0	0	0	0	0	0.0038	N	0	TRUE	FALSE
BRD-A15597386	picrotoxin	GABA receptor antagonist, GABRA1|GLRA2|GLRA3|GABRR1|GLRA1|GLRB|HTR3A|HTR3B	1131	CHRM3	cholinergic receptor muscarinic 3	pQSAR	0.9259	0.8838	0.8838	0.1692	0.5	0.5	0.9982	2	1	1	0	0	0	0	0	0	0.0005	N	0	TRUE	FALSE
BRD-A16311756	profenamine	butyrylcholinesterase inhibitors|cholinergic receptor antagonist|glutamate receptor antagonist, CHRM1|BCHE|CHRM2|GRIN3A	1131	CHRM3	cholinergic receptor muscarinic 3	StructureLikely	0.3803	0.9497	0.968	0.8207	0.5	0.5	0.9982	5	0	1	0	0	1	0	0	0	0.6339	N	0	FALSE	TRUE
BRD-A33711280	metixene	acetylcholine receptor antagonist, CHRM5|CHRM1|CHRM2|CHRM3|CHRM4	1128	CHRM1	cholinergic receptor muscarinic 1	Known	0.5425	0.9392	0.9392	0.5595	0.5	0.5	0.9982	8	0	1	0	0	0	0	0	1	0.2257	Y	1	FALSE	TRUE
BRD-A62525898	prednisone	glucocorticoid receptor agonist, NR3C1|HSD11B1	866	SERPINA6	serpin family A member 6	StructureLikely	0.6983	0.9276	0.9641	0.8365	0.5	0.5	0.9982	5	0	1	0	0	1	0	0	0	0.0456	N	0	FALSE	TRUE
BRD-A63894585	clobetasol	glucocorticoid receptor agonist, NR3C1|PLA2G1B	2908	NR3C1	nuclear receptor subfamily 3 group C member 1	Known	0.5525	0.9389	0.9765	0.9908	0.5	0.5	0.9982	8	0	1	0	0	1	1	0	1	0.2071	Y	1	FALSE	TRUE
BRD-A86109770	guggulsterone	estrogen receptor agonist|FXR antagonist|progesterone receptor agonist|cholesterol inhibitor|IKK inhibitor|PXR agonist, NR1H4|PGR|AR|ESR1|IKBKB|NR1I2|NR3C1|NR3C2	2908	NR3C1	nuclear receptor subfamily 3 group C member 1	Known	0.5996	0.9354	0.9529	0.9908	0.5	0.5	0.9982	8	0	1	0	0	1	1	0	1	0.1342	Y	1	FALSE	TRUE
BRD-A98431941	ephedrine	adrenergic receptor agonist, ACHE|ADRA1A|ADRB2|SLC18A2|SLC6A2	3269	HRH1	histamine receptor H1	StructureSure	0.8669	0.904	0.9772	0.9908	0.5	0.5	0.9982	6	1	1	0	0	1	1	0	0	0.0029	N	0	TRUE	TRUE
BRD-K06980535	promazine	dopamine receptor|dopamine receptor antagonist, CHRM5|DRD2|ADRA1A|ADRA1B|ADRA1D|CHRM1|CHRM2|CHRM3|CHRM4|DRD1|DRD3|DRD4|HRH1|HTR2A|HTR2C	152	ADRA2C	adrenoceptor alpha 2C	pIC50	0.3523	0.9516	0.9516	0.8939	0.5	0.5	0.9982	7	0	1	0	0	1	0	1	0	0.7058	N	0	FALSE	TRUE
BRD-K06980535	promazine	dopamine receptor|dopamine receptor antagonist, CHRM5|DRD2|ADRA1A|ADRA1B|ADRA1D|CHRM1|CHRM2|CHRM3|CHRM4|DRD1|DRD3|DRD4|HRH1|HTR2A|HTR2C	3358	HTR2C	5-hydroxytryptamine receptor 2C	Known	0.2617	0.9572	0.9662	0.8939	0.5	0.5	0.9982	8	0	1	0	0	1	0	1	1	0.8842	Y	1	FALSE	TRUE
BRD-K10042277	desmethylclozapine	acetylcholine receptor agonist|dopamine receptor agonist|dopamine receptor antagonist|dopamine receptor partial agonist|serotonin receptor antagonist|serotonin receptor inverse agonist, CHRM1|DRD2|DRD3|HTR2A	152	ADRA2C	adrenoceptor alpha 2C	StructureLikely	0.6645	0.9299	0.9561	0.9176	0.5	0.5	0.9982	5	0	1	0	0	1	0	0	0	0.0678	N	0	FALSE	TRUE
BRD-K10995081	perphenazine	dopamine receptor|dopamine receptor antagonist, DRD2|CALM1|DRD1|HRH1|HTR2A|HTR2C|HTR6|HTR7	1131	CHRM3	cholinergic receptor muscarinic 3	StructureLikely	0.5379	0.94	0.9498	0.824	0.5	0.5	0.9982	5	0	1	0	0	1	0	0	0	0.2346	N	0	FALSE	TRUE
BRD-K18895904	olanzapine	dopamine receptor antagonist|serotonin receptor antagonist, DRD2|HTR2A|HTR2C|DRD1|DRD3|DRD4|HRH1|HTR1A|HTR1B|HTR1D|HTR1E|HTR6|HTR7|ADRA1A|ADRA1B|ADRA2A|ADRA2B|ADRA2C|ADRB1|ADRB2|ADRB3|CHRM1|CHRM2|CHRM3|CHRM4|CHRM5|CYP2C8|DRD5|GABRA1|GABRA2|GABRA3|GABRA4|GABRA5|GABRA6|GABRB1|GABRB2|GABRB3|GABRD|GABRE|GABRG1|GABRG2|GABRG3|GABRP|GABRQ|HRH2|HRH4|HTR1F|HTR2B|HTR3A|HTR5A	1128	CHRM1	cholinergic receptor muscarinic 1	Known	0.451	0.9458	0.9557	0.5685	0.5	0.5	0.9982	8	0	1	0	0	0	0	1	1	0.4403	Y	1	FALSE	TRUE
BRD-K19352500	prochlorperazine	dopamine receptor antagonist|dopamine receptor, DRD2|DRD1|DRD3|DRD4	4128	MAOA	monoamine oxidase A	pQSAR	0.8352	0.909	0.909	0.4282	0.5	0.5	0.9982	2	1	1	0	0	0	0	0	0	0.0057	N	0	TRUE	FALSE
BRD-K26241953	piceatannol	syk inhibitor|cyclooxygenase inhibitor|nitric oxide synthase inhibitor|SIRT activator|tyrosinase inhibitor|tyrosine kinase inhibitor, ATP5A1|ATP5B|ATP5C1|IRF3|PTGS2|SIRT1|SYK|TYR	23411	SIRT1	sirtuin 1	Known	0.6005	0.9355	0.9532	0.9908	0.5	0.5	0.9982	8	0	1	0	0	1	1	0	1	0.1331	Y	1	FALSE	TRUE
BRD-K30466858	ellagic-acid	aldose reductase inhibitor|beta-secretase inhibitor|glutathione transferase inhibitor|HCV inhibitor|HIV integrase inhibitor|quorum sensing signaling modulator|reverse transcriptase inhibitor, CA1|CA12|CA14|CA2|CA4|CA6|CA9|SYK|AKR1B1|BACE1|CA3|CA5A|CA5B|CA7|CSNK2A1|GSK3B|PRKACA|PRKCA|PRKCB|SQLE	5579	PRKCB	protein kinase C beta	Known	0.5507	0.939	0.939	0.3381	0.5	0.4019	0.9982	8	0	1	0	0	0	0	0	1	0.2104	Y	1	FALSE	TRUE
BRD-K32744045	disulfiram	aldehyde dehydrogenase inhibitor|DNA methyltransferase inhibitor|TRPA1 agonist, ALDH2|ALDH1A2|ALDH5A1|ALDH7A1|CYP2E1|DBH|DNMT1|TRPA1	476	ATP1A1	ATPase Na+/K+ transporting subunit alpha 1	pQSAR	0.9259	0.8847	0.8847	0.1062	0.5	0.5	0.9982	2	1	1	0	0	0	0	0	0	0.0005	N	0	TRUE	FALSE
BRD-K37289225	clozapine	serotonin receptor antagonist|dopamine receptor antagonist|adrenergic receptor antagonist, DRD2|DRD4|ADRA1A|ADRA1B|CHRM1|DRD1|DRD3|HRH1|HRH4|HTR1A|HTR1B|HTR1D|HTR1E|HTR2A|HTR2C|HTR6|HTR7|ADRA1D|ADRA2A|ADRA2B|ADRA2C|CALY|CHRM2|CHRM3|CHRM4|CHRM5|CYP2C19|DRD5|HTR1F|HTR2B|HTR3A|HTR5A	1128	CHRM1	cholinergic receptor muscarinic 1	Known	0.5671	0.9376	0.9611	0.9176	0.5	0.5	0.9982	8	0	1	0	0	1	0	1	1	0.1821	Y	1	FALSE	TRUE
BRD-K40476324	digoxin	ATPase inhibitor|ROR antagonist, ATP1A1|ABCB1|RORC|SLCO1B3	3091	HIF1A	hypoxia inducible factor 1 subunit alpha	pQSAR	0.8613	0.9036	0.9036	0.117	0.5	0.6684	0.9982	2	1	1	0	0	0	0	0	0	0.0033	N	0	TRUE	FALSE
BRD-K45149020	amcinonide	corticosteroid agonist|cytochrome P450 inhibitor|glucocorticoid receptor agonist|immunosuppressant, NR3C1|ANXA1	866	SERPINA6	serpin family A member 6	StructureLikely	0.4247	0.9474	0.9661	0.8465	0.5	0.5	0.9982	5	0	1	0	0	1	0	0	0	0.5123	N	0	FALSE	TRUE
BRD-K49669041	BX-912	AKT inhibitor|phosphoinositide dependent kinase inhibitor|pyruvate dehydrogenase kinase inhibitor, PDPK1|AKT2|CDK2|CHEK1|GSK3B|KDR|PDK1	9212	AURKB	aurora kinase B	pQSAR	0.8586	0.9048	0.9048	0.4049	0.5	0.5	0.9982	2	1	1	0	0	0	0	0	0	0.0035	N	0	TRUE	FALSE
BRD-K53342282	cortisol	corticosteroid agonist, NR3C1|NR3C2	2908	NR3C1	nuclear receptor subfamily 3 group C member 1	Known	0.6399	0.9316	0.9694	0.9908	0.5	0.5	0.9982	8	0	1	0	0	1	1	1	1	0.0889	Y	1	FALSE	TRUE
BRD-K59058766	chlorprothixene	dopamine receptor|dopamine receptor antagonist, DRD2|CHRM1|CHRM2|CHRM3|CHRM4|CHRM5|DRD1|DRD3|HRH1|HTR2A|HTR2B|HTR2C	1128	CHRM1	cholinergic receptor muscarinic 1	Known	0.4339	0.9461	0.9766	0.9908	0.5	0.5	0.9982	8	0	1	0	0	1	1	0	1	0.4868	Y	1	FALSE	TRUE
BRD-K63068307	ZSTK-474	PI3K inhibitor, PIK3CG|PIK3CA|PIK3CB|PIK3CD	5293	PIK3CD	phosphatidylinositol-4,5-bisphosphate 3-kinase catalytic subunit delta	Known	0.946	0.8751	0.8751	0.2931	0.5	0.5	0.9982	8	1	1	0	0	0	0	1	1	0.0002	Y	1	TRUE	TRUE
BRD-K64931368	aminocaproic-acid	plasmin inhibitor|plasminogen activator inhibitor, PLG|PLAT|LPA	9290	GPR55	G protein-coupled receptor 55	pQSAR	0.8361	0.9103	0.9103	0.25	0.5	0.5	0.9982	2	1	1	0	0	0	0	0	0	0.0056	N	0	TRUE	FALSE
BRD-K67174588	toremifene	selective estrogen receptor modulator (SERM)|estrogen receptor antagonist, ESR1|CYP3A5	5243	ABCB1	ATP binding cassette subfamily B member 1	pQSAR	0.8514	0.9058	0.9058	0.5165	0.5	0.5	0.9982	2	1	1	0	0	0	0	0	0	0.0041	N	0	TRUE	FALSE
BRD-K70487031	flupentixol	dopamine receptor antagonist, DRD2|DRD1|ADRA1A|CHRM1|DRD3|DRD5|HTR2A	1812	DRD1	dopamine receptor D1	Known	0.5746	0.9366	0.9594	0.8499	0.5	0.5	0.9982	8	0	1	0	0	1	0	1	1	0.17	Y	1	FALSE	TRUE
BRD-K70592963	phenindione	vitamin antagonist, VKORC1	154	ADRB2	adrenoceptor beta 2	pQSAR	0.9062	0.8925	0.8925	0.3265	0.5	0.5	0.9982	2	1	1	0	0	0	0	0	0	0.001	N	0	TRUE	FALSE
BRD-K75958195	pizotifen	serotonin receptor antagonist, HTR2A|HTR1A|HTR2C	3358	HTR2C	5-hydroxytryptamine receptor 2C	Known	0.2913	0.9553	0.9553	0.6321	0.5	0.5	0.9982	8	0	1	0	0	0	0	1	1	0.8365	Y	1	FALSE	TRUE
BRD-K81418486	vorinostat	HDAC inhibitor|cell cycle inhibitor, HDAC1|HDAC2|HDAC3|HDAC6|HDAC8|HDAC10|HDAC11|HDAC5|HDAC9	10013	HDAC6	histone deacetylase 6	Known	0.6735	0.9289	0.9289	0.7156	0.8192	0.7087	0.9982	8	0	1	0	1	0	0	1	1	0.0612	Y	1	FALSE	TRUE
BRD-K89104321	gaboxadol	GABA receptor agonist|GABA receptor partial agonist, GABRD|GABRA1|GABRA2|GABRA3|GABRA4|GABRA5|GABRA6|GABRR1|GABRR2|GABRR3	2224	FDPS	farnesyl diphosphate synthase	pQSAR	0.8699	0.903	0.903	0.1033	0.5	0.5	0.9982	2	1	1	0	0	0	0	0	0	0.0027	N	0	TRUE	FALSE
BRD-A15079084	phorbol-12-myristate-13-acetate	PKC activator|CD antagonist, CD4|KCNT2|PRKCA|TRPV4	1577	CYP3A5	cytochrome P450 family 3 subfamily A member 5	pQSAR	0.9003	0.8924	0.8924	0.3265	0.5	0.5	0.9981	2	1	1	0	0	0	0	0	0	0.0012	N	0	TRUE	FALSE
BRD-A21490874	fluoxymesterone	androgen receptor agonist, AR|ESR1|NR3C1|PRLR	367	AR	androgen receptor	Known	0.5841	0.9354	0.9596	0.8273	0.5	0.5	0.9981	8	0	1	0	0	1	0	0	1	0.1557	Y	1	FALSE	TRUE
BRD-A28746609	paclitaxel	tubulin inhibitor|microtubule stabilizing agent|microtubule stimulant|P glycoprotein inhibitor|taxane, TUBB|NR1I2|ABCB1|BCL2|CYP2C8|MAP2|MAP4|MAPT|TLR4|TUBB1	51564	HDAC7	histone deacetylase 7	pQSAR	0.9168	0.8865	0.8865	0.1264	0.5	0.5944	0.9981	2	1	1	0	0	0	0	0	0	0.0007	N	0	TRUE	FALSE
BRD-A48570745	ivermectin	GABA receptor agonist|acetylcholine receptor allosteric modulator|GABA release stimulant|purinergic receptor allosteric modulator, CHRNA7|GABRB3|GLRA3|P2RX7	3551	IKBKB	inhibitor of nuclear factor kappa B kinase subunit beta	pQSAR	0.8549	0.9043	0.9043	0.1692	0.5	0.5	0.9981	2	1	1	0	0	0	0	0	0	0.0038	N	0	TRUE	FALSE
BRD-A65767837	hydrocortisone	corticosteroid agonist|glucocorticoid receptor agonist|immunosuppressant|interleukin receptor antagonist, ANXA1|NOS2|NR3C1|NR3C2	866	SERPINA6	serpin family A member 6	StructureLikely	0.6432	0.9302	0.9659	0.8332	0.5	0.5	0.9981	5	0	1	0	0	1	0	0	0	0.0858	N	0	FALSE	TRUE
BRD-A71459254	cymarin	ATPase inhibitor, ATP1A1	486	FXYD2	FXYD domain containing ion transport regulator 2	StructureLikely	0.3219	0.9519	0.9621	0.8044	0.7891	0.5	0.9981	5	0	1	0	0	1	0	0	0	0.7762	N	0	FALSE	TRUE
BRD-A84066268	BRD-A84066268	ATPase inhibitor, ATP1A1|ATP1A2|ATP1A3|ATP1A4|ATP1B1|ATP1B2|ATP1B3|ATP1B4|FXYD2	478	ATP1A3	ATPase Na+/K+ transporting subunit alpha 3	Known	0.5083	0.9411	0.9549	0.9908	0.7635	0.8919	0.9981	8	0	1	1	0	1	1	0	1	0.297	Y	1	FALSE	TRUE
BRD-A84134924	pancuronium	acetylcholine receptor antagonist, CHRM2|CHRM3|CHRNA1|CHRNA2	1577	CYP3A5	cytochrome P450 family 3 subfamily A member 5	pQSAR	0.8502	0.9049	0.9049	0.4752	0.5	0.5	0.9981	2	1	1	0	0	0	0	0	0	0.0042	N	0	TRUE	FALSE
BRD-K00610438	altanserin	serotonin receptor antagonist|collagen stimulant, HTR2A|HTR2C	3269	HRH1	histamine receptor H1	pQSAR	0.9259	0.8828	0.8828	0.5549	0.5	0.5	0.9981	2	1	1	0	0	0	0	0	0	0.0005	N	0	TRUE	FALSE
BRD-K05396879	15-delta-prostaglandin-j2	PPAR receptor agonist|FXR antagonist, PPARG|NR1H4	5468	PPARG	peroxisome proliferator activated receptor gamma	Known	0.776	0.9164	0.9771	0.9908	0.5	0.8919	0.9981	8	0	1	1	0	1	1	0	1	0.0158	Y	1	FALSE	TRUE
BRD-K15108141	gemcitabine	cell cycle inhibitor|DNA repair enzyme inhibitor|DNA synthesis inhibitor|pyrimidine antagonist|ribonucleoside reductase inhibitor|ribonucleotide reductase inhibitor, RRM1|CMPK1|RRM2|TYMS	6240	RRM1	ribonucleotide reductase catalytic subunit M1	Known	0.815	0.9119	0.9119	0.3933	0.5	0.5	0.9981	8	1	1	0	0	0	0	0	1	0.0083	Y	1	TRUE	TRUE
BRD-K21680192	mitoxantrone	topoisomerase inhibitor|DNA intercalating drug|HCV inhibitor|immunosuppressant|Pim kinase inhibitor, TOP2A|PIM1	7153	TOP2A	DNA topoisomerase II alpha	Known	0.9062	0.8911	0.8911	0.1881	0.5	0.8378	0.9981	8	1	1	1	0	0	0	0	1	0.001	Y	1	TRUE	TRUE
BRD-K22227508	targinine	nitric oxide synthase inhibitor, NOS2|NOS3	1128	CHRM1	cholinergic receptor muscarinic 1	pQSAR	0.8408	0.9063	0.9063	0.1571	0.5	0.5	0.9981	2	1	1	0	0	0	0	0	0	0.0051	N	0	TRUE	FALSE
BRD-K35559145	levomepromazine	dopamine receptor, ADRA1A|ADRA1B|ADRA1D|ADRA2A|ADRA2B|ADRA2C|CHRM1|CHRM2|CHRM3|CHRM4|CHRM5|DRD1|DRD2|DRD3|DRD4|DRD5|HRH1|HTR2A|HTR2C	1128	CHRM1	cholinergic receptor muscarinic 1	Known	0.4544	0.9441	0.9509	0.6878	0.5	0.5	0.9981	8	0	1	0	0	0	0	0	1	0.431	Y	1	FALSE	TRUE
BRD-K35559145	levomepromazine	dopamine receptor, ADRA1A|ADRA1B|ADRA1D|ADRA2A|ADRA2B|ADRA2C|CHRM1|CHRM2|CHRM3|CHRM4|CHRM5|DRD1|DRD2|DRD3|DRD4|DRD5|HRH1|HTR2A|HTR2C	1131	CHRM3	cholinergic receptor muscarinic 3	Known	0.4454	0.9441	0.9509	0.6878	0.5	0.5	0.9981	8	0	1	0	0	0	0	0	1	0.4555	Y	1	FALSE	TRUE
BRD-K35559145	levomepromazine	dopamine receptor, ADRA1A|ADRA1B|ADRA1D|ADRA2A|ADRA2B|ADRA2C|CHRM1|CHRM2|CHRM3|CHRM4|CHRM5|DRD1|DRD2|DRD3|DRD4|DRD5|HRH1|HTR2A|HTR2C	3269	HRH1	histamine receptor H1	Known	0.4536	0.9441	0.9557	0.8734	0.5	0.5	0.9981	8	0	1	0	0	1	0	0	1	0.4333	Y	1	FALSE	TRUE
BRD-K37289225	clozapine	serotonin receptor antagonist|dopamine receptor antagonist|adrenergic receptor antagonist, DRD2|DRD4|ADRA1A|ADRA1B|CHRM1|DRD1|DRD3|HRH1|HRH4|HTR1A|HTR1B|HTR1D|HTR1E|HTR2A|HTR2C|HTR6|HTR7|ADRA1D|ADRA2A|ADRA2B|ADRA2C|CALY|CHRM2|CHRM3|CHRM4|CHRM5|CYP2C19|DRD5|HTR1F|HTR2B|HTR3A|HTR5A	150	ADRA2A	adrenoceptor alpha 2A	Known	0.4713	0.9427	0.9611	0.7778	0.5	0.5	0.9981	8	0	1	0	0	0	0	1	1	0.3866	Y	1	FALSE	TRUE
BRD-K37814297	acepromazine	dopamine receptor antagonist, ADRA1A|ADRA1B|DRD1|DRD2|HTR1A|HTR2A	1131	CHRM3	cholinergic receptor muscarinic 3	StructureLikely	0.6137	0.9336	0.9567	0.8073	0.5	0.5	0.9981	5	0	1	0	0	1	0	0	0	0.1167	N	0	FALSE	TRUE
BRD-K37949327	etidronic-acid	bisphosphonate|bone resorption inhibitor|farnesyl pyrophosphate synthase inhibitors|hypercalcaemic agent|osteoclast inhibitor, PTPRS|ATP6V1A|FDPS	1577	CYP3A5	cytochrome P450 family 3 subfamily A member 5	pQSAR	0.886	0.8968	0.8968	0.1186	0.5	0.5	0.9981	2	1	1	0	0	0	0	0	0	0.0018	N	0	TRUE	FALSE
BRD-K42191735	buparlisib	PI3K inhibitor|protein kinase inhibitor, PIK3CA|PIK3CG	5294	PIK3CG	phosphatidylinositol-4,5-bisphosphate 3-kinase catalytic subunit gamma	Known	0.7104	0.9241	0.9241	0.3497	0.5	0.5	0.9981	8	0	1	0	0	0	0	1	1	0.0392	Y	1	FALSE	TRUE
BRD-K48692744	NU-1025	PARP inhibitor|DNA dependent protein kinase inhibitor, PARP1	142	PARP1	poly(ADP-ribose) polymerase 1	Known	0.6096	0.9339	0.9339	0.4895	0.5	0.5	0.9981	8	0	1	0	0	0	0	0	1	0.1216	Y	1	FALSE	TRUE
BRD-K49448285	bisindolylmaleimide	CDK inhibitor|PKC inhibitor|leucine rich repeat kinase inhibitor, CCND1|CDK4|LRRK2|PDPK1|PIM1|PRKCA|PRKCB|PRKCI|PRKCZ	595	CCND1	cyclin D1	Known	0.6942	0.9254	0.9277	0.7576	0.5	0.5	0.9981	8	0	1	0	0	0	0	0	1	0.0479	Y	1	FALSE	TRUE
BRD-K52075040	cerulenin	fatty acid synthase inhibitor|fatty acid oxidation inhibitor, FASN	338557	FFAR4	free fatty acid receptor 4	pQSAR	0.8586	0.9035	0.9035	0.3613	0.5	0.5	0.9981	2	1	1	0	0	0	0	0	0	0.0035	N	0	TRUE	FALSE
BRD-K52989797	clomipramine	serotonin transporter (SERT) inhibitor|dopamine transporter (DAT) inhibitor|norepinephrine transporter (NET) inhibitor, SLC6A4|SLC6A2|CYP2C19|GSTP1|HTR2A|HTR2B|HTR2C|SLC6A3	1812	DRD1	dopamine receptor D1	StructureLikely	0.3997	0.9477	0.9625	0.8734	0.5	0.5	0.9981	5	0	1	0	0	1	0	0	0	0.5814	N	0	FALSE	TRUE
BRD-K69600043	thiethylperazine	dopamine receptor antagonist, DRD1|DRD2|DRD4	185	AGTR1	angiotensin II receptor type 1	pQSAR	0.815	0.9116	0.9116	0.1692	0.5	0.5	0.9981	2	1	1	0	0	0	0	0	0	0.0083	N	0	TRUE	FALSE
BRD-K69650333	idarubicin	topoisomerase inhibitor|radical formation stimulant|RNA synthesis inhibitor, TOP2A	7153	TOP2A	DNA topoisomerase II alpha	Known	0.9062	0.8911	0.9747	0.9908	0.5	0.5	0.9981	8	1	1	0	0	1	1	0	1	0.001	Y	1	TRUE	TRUE
BRD-K72414522	AZD-5438	CDK inhibitor, CCNB1|CCNE1|CDK1|CDK2|KCNH2	1017	CDK2	cyclin dependent kinase 2	Known	0.8061	0.912	0.912	0.2608	0.5	0.5	0.9981	8	1	1	0	0	0	0	1	1	0.0097	Y	1	TRUE	TRUE
BRD-K75527158	alendronic-acid	bisphosphonate|bone resorption inhibitor|osteoclast inhibitor|tyrosine phosphatase inhibitor, FDPS|PTPRS|ATP6V1A|PTPN4|PTPRE	523	ATP6V1A	ATPase H+ transporting V1 subunit A	Known	0.3418	0.9506	0.9506	0.4967	0.5	0.5	0.9981	8	0	1	0	0	0	0	0	1	0.7312	Y	1	FALSE	TRUE
BRD-K80970344	pyrrolidine-dithiocarbamate	NFkB pathway inhibitor, HSD11B1|RELA	2548	GAA	alpha glucosidase	pQSAR	0.882	0.8974	0.8974	0.1053	0.5	0.5	0.9981	2	1	1	0	0	0	0	0	0	0.002	N	0	TRUE	FALSE
BRD-K81521265	dicyclohexylurea	epoxide hydolase inhibitor, EPHX2	1131	CHRM3	cholinergic receptor muscarinic 3	pQSAR	0.8561	0.9042	0.9042	0.1989	0.5	0.5	0.9981	2	1	1	0	0	0	0	0	0	0.0037	N	0	TRUE	FALSE
BRD-K88701661	dimercaptosuccinic-acid	chelating agent|DNA methyltransferase inhibitor, DNMT1	5144	PDE4D	phosphodiesterase 4D	pQSAR	0.8157	0.911	0.911	0.1338	0.5	0.5	0.9981	2	1	1	0	0	0	0	0	0	0.0082	N	0	TRUE	FALSE
BRD-K94649603	taxifolin	apolipoprotein secretion inhibitor|beta amyloid aggregation inhibitor|cholesterol biosynthesis inhibitor|HMGCR inhibitor|NFkB pathway modulator|opioid receptor antagonist|reverse transcriptase inhibitor, APOB|APP|HMGCR	2548	GAA	alpha glucosidase	pQSAR	0.83	0.9087	0.9318	0.6037	0.5	0.5	0.9981	2	1	1	0	0	0	0	0	0	0.0063	N	0	TRUE	FALSE
BRD-K95237249	probenecid	MRP inhibitor|TRPV agonist|uricosuric blocker, SLC22A6|ABCC1|PANX1|SLC22A11|SLC22A8|SLCO1C1|TRPV2	1786	DNMT1	DNA methyltransferase 1	pQSAR	0.8111	0.9125	0.9125	0.3613	0.5	0.5	0.9981	2	1	1	0	0	0	0	0	0	0.0089	N	0	TRUE	FALSE
BRD-K99545815	PF-562271	focal adhesion kinase inhibitor|angiogenesis inhibitor|apoptosis stimulant, PTK2|PTK2B	3815	KIT	KIT proto-oncogene, receptor tyrosine kinase	pQSAR	0.8086	0.9121	0.9121	0.4049	0.5	0.5	0.9981	2	1	1	0	0	0	0	0	0	0.0093	N	0	TRUE	FALSE
BRD-A45664787	iloprost	platelet aggregation inhibitor|prostanoid receptor agonist|prostacyclin analog, PTGIR|PTGER1|PTGER2|PDE4A|PDE4B|PDE4C|PDE4D|PLAT|PTGDR|PTGER3|PTGER4|PTGFR|TBXA2R	5468	PPARG	peroxisome proliferator activated receptor gamma	pQSAR	0.8561	0.9019	0.9019	0.4165	0.5	0.5	0.998	2	1	1	0	0	0	0	0	0	0.0037	N	0	TRUE	FALSE
BRD-A55393291	testosterone	androgen receptor (AR) agonist|androgen receptor agonist|testosterone receptor agonist, AR|CYP19A1|CYP2C19|CYP2C8|CYP3A5	367	AR	androgen receptor	Known	0.6244	0.9307	0.9767	0.9908	0.5	0.5	0.998	8	0	1	0	0	1	1	0	1	0.1046	Y	1	FALSE	TRUE
BRD-A59808129	guggulsterone	estrogen receptor agonist|FXR antagonist|progesterone receptor agonist|cholesterol inhibitor|IKK inhibitor|PXR agonist, NR1H4|PGR|AR|ESR1|IKBKB|NR1I2|NR3C1|NR3C2	2099	ESR1	estrogen receptor 1	Known	0.5491	0.9363	0.9771	0.9908	0.5	0.5	0.998	8	0	1	0	0	1	1	0	1	0.2134	Y	1	FALSE	TRUE
BRD-A65767837	hydrocortisone	corticosteroid agonist|glucocorticoid receptor agonist|immunosuppressant|interleukin receptor antagonist, ANXA1|NOS2|NR3C1|NR3C2	301	ANXA1	annexin A1	Known	0.7175	0.9225	0.9694	0.9115	0.5	0.5	0.998	8	0	1	0	0	1	0	0	1	0.0358	Y	1	FALSE	TRUE
BRD-A69951442	dexamethasone	glucocorticoid receptor agonist|corticosteroid agonist|immunosuppressant, ANXA1|CYP3A4|CYP3A5|NOS2|NR0B1|NR3C1|NR3C2	301	ANXA1	annexin A1	Known	0.5704	0.9355	0.9746	0.9908	0.5	0.5	0.998	8	0	1	0	0	1	1	0	1	0.1767	Y	1	FALSE	TRUE
BRD-A75172220	hydrocortisone	corticosteroid agonist|glucocorticoid receptor agonist|immunosuppressant|interleukin receptor antagonist, ANXA1|NOS2|NR3C1|NR3C2	190	NR0B1	nuclear receptor subfamily 0 group B member 1	NCI60	0.571	0.9355	0.9355	0.5021	0.5	0.8862	0.998	3	0	1	1	0	0	0	0	0	0.1758	N	0	FALSE	TRUE
BRD-A80638690	floxuridine	DNA synthesis inhibitor|MDCK inhibitor|PEPT1 inhibitor|pyrimidine antagonist, TYMS	5422	POLA1	DNA polymerase alpha 1, catalytic subunit	pQSAR	0.8976	0.8912	0.8912	0.5021	0.5	0.6395	0.998	2	1	1	0	0	0	0	0	0	0.0013	N	0	TRUE	FALSE
BRD-A93424738	dexamethasone	glucocorticoid receptor agonist|corticosteroid agonist|immunosuppressant, ANXA1|CYP3A4|CYP3A5|NOS2|NR0B1|NR3C1|NR3C2	1577	CYP3A5	cytochrome P450 family 3 subfamily A member 5	Known	0.6306	0.9305	0.977	0.9908	0.5	0.5	0.998	8	0	1	0	0	1	1	0	1	0.0981	Y	1	FALSE	TRUE
BRD-A98431941	ephedrine	adrenergic receptor agonist, ACHE|ADRA1A|ADRB2|SLC18A2|SLC6A2	150	ADRA2A	adrenoceptor alpha 2A	StructureSure	0.5707	0.9351	0.9772	0.9908	0.5	0.5	0.998	6	0	1	0	0	1	1	0	0	0.1762	N	0	FALSE	TRUE
BRD-K00198051	zuclopenthixol	dopamine receptor antagonist, DRD2|DRD1|ADRA1A|ADRA2A|DRD5|HRH1|HTR2A	3358	HTR2C	5-hydroxytryptamine receptor 2C	pIC50	0.561	0.9361	0.9609	0.8365	0.5	0.5	0.998	7	0	1	0	0	1	0	1	0	0.1922	N	0	FALSE	TRUE
BRD-K01014769	isoflupredone	glucocorticoid receptor agonist, NR3C1	1577	CYP3A5	cytochrome P450 family 3 subfamily A member 5	StructureLikely	0.8185	0.9091	0.9694	0.8699	0.5	0.5	0.998	5	1	1	0	0	1	0	0	0	0.0078	N	0	TRUE	TRUE
BRD-K02265150	amoxapine	adrenergic transmitter uptake inhibitor|dopamine receptor|norepinephrine reputake inhibitor|serotonin receptor antagonist|serotonin reuptake inhibitor|serotonin uptake inhibitor|tricyclic antidepressant, SLC6A2|SLC6A4|HTR2A|HTR6|ADRA1A|ADRA1B|ADRA1D|ADRA2A|ADRA2B|ADRA2C|CHRM1|CHRM2|CHRM3|CHRM4|CHRM5|DRD1|DRD2|DRD3|DRD4|GABRA1|GABRA2|GABRA3|GABRA4|GABRA5|GABRA6|GABRB1|GABRB2|GABRB3|GABRD|GABRE|GAB…	150	ADRA2A	adrenoceptor alpha 2A	Known	0.62	0.9308	0.9584	0.9092	0.5	0.5	0.998	8	0	1	0	0	1	0	0	1	0.1095	Y	1	FALSE	TRUE
BRD-K08619574	thioproperazine	dopamine receptor antagonist, ADRA1A|ADRA1B|DRD1|DRD2|HTR1A|HTR2A	1812	DRD1	dopamine receptor D1	Known	0.4994	0.9403	0.9593	0.8044	0.5	0.5	0.998	8	0	1	0	0	1	0	0	1	0.3175	Y	1	FALSE	TRUE
BRD-K18895904	olanzapine	dopamine receptor antagonist|serotonin receptor antagonist, DRD2|HTR2A|HTR2C|DRD1|DRD3|DRD4|HRH1|HTR1A|HTR1B|HTR1D|HTR1E|HTR6|HTR7|ADRA1A|ADRA1B|ADRA2A|ADRA2B|ADRA2C|ADRB1|ADRB2|ADRB3|CHRM1|CHRM2|CHRM3|CHRM4|CHRM5|CYP2C8|DRD5|GABRA1|GABRA2|GABRA3|GABRA4|GABRA5|GABRA6|GABRB1|GABRB2|GABRB3|GABRD|GABRE|GABRG1|GABRG2|GABRG3|GABRP|GABRQ|HRH2|HRH4|HTR1F|HTR2B|HTR3A|HTR5A	2565	GABRG1	gamma-aminobutyric acid type A receptor subunit gamma1	Known	0.6576	0.9279	0.9279	0.373	0.5	0.5	0.998	8	0	1	0	0	0	0	0	1	0.0733	Y	1	FALSE	TRUE
BRD-K19352500	prochlorperazine	dopamine receptor antagonist|dopamine receptor, DRD2|DRD1|DRD3|DRD4	1131	CHRM3	cholinergic receptor muscarinic 3	StructureLikely	0.4476	0.9432	0.9532	0.9031	0.5	0.5	0.998	5	0	1	0	0	1	0	0	0	0.4493	N	0	FALSE	TRUE
BRD-K28143534	cyproheptadine	histamine receptor antagonist|serotonin receptor antagonist, HRH1|ADRA1A|ADRA1B|ADRA1D|CHRM1|CHRM2|CHRM3|HTR2A|HTR2B|HTR2C|HTR6|HTR7	3358	HTR2C	5-hydroxytryptamine receptor 2C	Known	0.4565	0.9432	0.9544	0.6321	0.5	0.5	0.998	8	0	1	0	0	0	0	0	1	0.4254	Y	1	FALSE	TRUE
BRD-K29582115	ziprasidone	dopamine receptor antagonist|serotonin receptor antagonist|norepinephrine reuptake inhibitor|serotonin receptor agonist|serotonin reuptake inhibitor, DRD2|HTR2A|HTR1A|HTR1D|HRH1|HTR1B|HTR1E|HTR2C|HTR7|ADRA1A|ADRA1B|ADRA2A|ADRA2B|ADRA2C|CHRM1|CHRM2|CHRM3|CHRM4|CHRM5|DRD1|DRD3|DRD4|DRD5|HTR3A|HTR6|SLC6A4	154	ADRB2	adrenoceptor beta 2	pQSAR	0.8613	0.9009	0.9009	0.1692	0.5	0.5	0.998	2	1	1	0	0	0	0	0	0	0.0033	N	0	TRUE	FALSE
BRD-K30466858	ellagic-acid	aldose reductase inhibitor|beta-secretase inhibitor|glutathione transferase inhibitor|HCV inhibitor|HIV integrase inhibitor|quorum sensing signaling modulator|reverse transcriptase inhibitor, CA1|CA12|CA14|CA2|CA4|CA6|CA9|SYK|AKR1B1|BACE1|CA3|CA5A|CA5B|CA7|CSNK2A1|GSK3B|PRKACA|PRKCA|PRKCB|SQLE	1457	CSNK2A1	casein kinase 2 alpha 1	Known	0.577	0.9345	0.9345	0.2931	0.5	0.4827	0.998	8	0	1	0	0	0	0	0	1	0.1663	Y	1	FALSE	TRUE
BRD-K32795028	1-benzylimidazole	thromboxane synthase inhibitor, CYP11B1|QPCT	154	ADRB2	adrenoceptor beta 2	pQSAR	0.848	0.9029	0.9029	0.373	0.5	0.5	0.998	2	1	1	0	0	0	0	0	0	0.0044	N	0	TRUE	FALSE
BRD-K35520305	dacarbazine	DNA alkylating drug, PGD|POLA2	3615	IMPDH2	inosine monophosphate dehydrogenase 2	pQSAR	0.8221	0.9083	0.9083	0.1989	0.5	0.57	0.998	2	1	1	0	0	0	0	0	0	0.0073	N	0	TRUE	FALSE
BRD-K35708212	ouabain	ATPase inhibitor|alpha subunit binder, ATP1A1|ATP1A2|ATP1A3|ATP1A4|ATP1B1|ATP1B2|ATP1B3|ATP1B4|FXYD2	3551	IKBKB	inhibitor of nuclear factor kappa B kinase subunit beta	pQSAR	0.913	0.885	0.885	0.1652	0.7469	0.5131	0.998	2	1	1	0	0	0	0	0	0	0.0008	N	0	TRUE	FALSE
BRD-K39915878	loxapine	dopamine receptor antagonist|serotonin receptor antagonist|dopamine receptor ligand, DRD2|DRD3|DRD4|DRD1|HRH1|HTR2A|HTR2C|HTR6|ADRA1A|ADRA1B|ADRA2A|ADRA2B|ADRA2C|ADRB1|CHRM1|CHRM2|CHRM3|CHRM4|CHRM5|DRD5|HRH2|HRH4|HTR1A|HTR1B|HTR1D|HTR1E|HTR3A|HTR5A|HTR7|SLC6A2|SLC6A3|SLC6A4	1577	CYP3A5	cytochrome P450 family 3 subfamily A member 5	pQSAR	0.8192	0.9087	0.9087	0.4049	0.5	0.5	0.998	2	1	1	0	0	0	0	0	0	0.0077	N	0	TRUE	FALSE
BRD-K41524689	paracetamol	cyclooxygenase inhibitor, PTGS1|PTGS2|CYP2E1	5743	PTGS2	prostaglandin-endoperoxide synthase 2	Known	0.7568	0.9178	0.9178	0.3265	0.5	0.5	0.998	8	0	1	0	0	0	0	0	1	0.021	Y	1	FALSE	TRUE
BRD-K42095107	daidzein	estrogen receptor agonist, ESRRA|ESRRB|ESRRG|TRPC5	5743	PTGS2	prostaglandin-endoperoxide synthase 2	pQSAR	0.8537	0.9029	0.9291	0.5685	0.5	0.5	0.998	2	1	1	0	0	0	0	0	0	0.0039	N	0	TRUE	FALSE
BRD-K43389675	daunorubicin	RNA synthesis inhibitor|topoisomerase inhibitor|DNA synthesis inhibitor|radical formation stimulant, TOP2A|TOP2B	7153	TOP2A	DNA topoisomerase II alpha	Known	0.8684	0.8997	0.9754	0.9908	0.5	0.8919	0.998	8	1	1	1	0	1	1	0	1	0.0028	Y	1	TRUE	TRUE
BRD-K43405658	tyrphostin-AG-527	protein tyrosine kinase inhibitor, EGFR	5743	PTGS2	prostaglandin-endoperoxide synthase 2	pQSAR	0.9168	0.8844	0.8844	0.4282	0.5	0.5	0.998	2	1	1	0	0	0	0	0	0	0.0007	N	0	TRUE	FALSE
BRD-K53342282	cortisol	corticosteroid agonist, NR3C1|NR3C2	301	ANXA1	annexin A1	StructureSure	0.7195	0.9225	0.9694	0.9908	0.5	0.5	0.998	6	0	1	0	0	1	1	0	0	0.0349	N	0	FALSE	TRUE
BRD-K57139258	z-guggulsterone	cholesterol inhibitor|estrogen receptor agonist|FXR antagonist|IKK inhibitor|progesterone receptor agonist|PXR agonist, NR1H4|ESR1|IKBKB|NR1I2|PGR	2908	NR3C1	nuclear receptor subfamily 3 group C member 1	StructureSure	0.5615	0.9354	0.9529	0.9908	0.5	0.5	0.998	6	0	1	0	0	1	1	0	0	0.1914	N	0	FALSE	TRUE
BRD-K63675182	triflupromazine	acetylcholine receptor ligand|dopamine receptor, HTR2B|CHRM1|CHRM2|CHRNA7|DRD1|DRD2	1128	CHRM1	cholinergic receptor muscarinic 1	Known	0.4604	0.9428	0.9567	0.8332	0.5	0.5	0.998	8	0	1	0	0	1	0	0	1	0.4151	Y	1	FALSE	TRUE
BRD-K63675182	triflupromazine	acetylcholine receptor ligand|dopamine receptor, HTR2B|CHRM1|CHRM2|CHRNA7|DRD1|DRD2	150	ADRA2A	adrenoceptor alpha 2A	pIC50	0.5902	0.9341	0.9352	0.814	0.5	0.5	0.998	7	0	1	0	0	1	0	1	0	0.1469	N	0	FALSE	TRUE
BRD-K64994968	progesterone	progesterone receptor agonist, PGR|CYP17A1|NR3C2|CATSPER1|CATSPER2|CATSPER3|CATSPER4|CYP2C19|ESR1|OPRK1|TRPC5	2099	ESR1	estrogen receptor 1	Known	0.6992	0.9238	0.9756	0.9908	0.5	0.8919	0.998	8	0	1	1	0	1	1	0	1	0.0451	Y	1	FALSE	TRUE
BRD-K70487031	flupentixol	dopamine receptor antagonist, DRD2|DRD1|ADRA1A|CHRM1|DRD3|DRD5|HTR2A	801	CALM1	calmodulin 1	pQSAR	0.838	0.9055	0.9594	0.7495	0.5	0.5	0.998	2	1	1	0	0	0	0	0	0	0.0054	N	0	TRUE	FALSE
BRD-K70504303	prednisolone	glucocorticoid receptor agonist, NR3C1|NR3C2|SERPINA6	866	SERPINA6	serpin family A member 6	Known	0.5844	0.9337	0.969	0.9908	0.5	0.5	0.998	8	0	1	0	0	1	1	0	1	0.1553	Y	1	FALSE	TRUE
BRD-K70592963	phenindione	vitamin antagonist, VKORC1	116443	GRIN3A	glutamate ionotropic receptor NMDA type subunit 3A	pQSAR	0.8343	0.9063	0.9063	0.5165	0.5	0.5	0.998	2	1	1	0	0	0	0	0	0	0.0058	N	0	TRUE	FALSE
BRD-K77947974	fluspirilene	dopamine receptor|dopamine receptor antagonist, DRD2|HTR2A|CACNG1|HRH1|HTR1A|HTR1D|HTR1E	1812	DRD1	dopamine receptor D1	StructureLikely	0.703	0.9241	0.9439	0.8603	0.5	0.7974	0.998	5	0	1	0	0	1	0	0	0	0.043	N	0	FALSE	TRUE
BRD-K82624463	prednisone	glucocorticoid receptor agonist, NR3C1|HSD11B1	2908	NR3C1	nuclear receptor subfamily 3 group C member 1	Known	0.4011	0.9464	0.9652	0.9908	0.5	0.5	0.998	8	0	1	0	0	1	1	0	1	0.5774	Y	1	FALSE	TRUE
BRD-K87024524	phenelzine	monoamine oxidase inhibitor, MAOB|AOC3|MAOA|ABAT|GAD2|GPT|GPT2|SLC6A2|SLC6A3|SLC6A4	1131	CHRM3	cholinergic receptor muscarinic 3	pQSAR	0.946	0.8703	0.8703	0.2419	0.5	0.5	0.998	2	1	1	0	0	0	0	0	0	0.0002	N	0	TRUE	FALSE
BRD-K91263825	nortriptyline	PI3K inhibitor|potassium channel blocker|tricyclic antidepressant (TCA), KCNJ10|SLC6A2|SLC6A4|ADRA1A|ADRA1B|ADRA1D|ADRA2A|ADRA2B|ADRA2C|ADRB1|ADRB2|ADRB3|CHRM1|CHRM2|CHRM3|CHRM4|CHRM5|CYP2C19|DRD2|HRH1|HTR1A|HTR2A|HTR2C|HTR6|PGRMC1|PIK3CD|SIGMAR1	6275	S100A4	S100 calcium binding protein A4	pQSAR	0.8525	0.9021	0.9021	0.1159	0.5	0.5	0.998	2	1	1	0	0	0	0	0	0	0.004	N	0	TRUE	FALSE
BRD-A09828896	SKF-81297	dopamine receptor agonist, DRD1|DRD5	1812	DRD1	dopamine receptor D1	Known	0.6913	0.9239	0.9643	0.9908	0.5	0.5	0.9979	8	0	1	0	0	1	1	0	1	0.0496	Y	1	FALSE	TRUE
BRD-A25067867	benzatropine	anticholinergic, CHRM1|HRH1|SLC6A3	1128	CHRM1	cholinergic receptor muscarinic 1	Known	0.5274	0.937	0.9747	0.9908	0.5	0.5	0.9979	8	0	1	0	0	1	1	1	1	0.2557	Y	1	FALSE	TRUE
BRD-A29731977	17-hydroxyprogesterone-caproate	progesterone receptor agonist, CYP1A2|CYP2B6|CYP3A5|PGR	1577	CYP3A5	cytochrome P450 family 3 subfamily A member 5	Known	0.8748	0.8959	0.9375	0.6843	0.5	0.6969	0.9979	8	1	1	0	0	0	0	0	1	0.0024	Y	1	TRUE	TRUE
BRD-A36267905	buphenine	adrenergic receptor agonist, ADRB2	154	ADRB2	adrenoceptor beta 2	Known	0.7889	0.9115	0.9549	0.814	0.5	0.5	0.9979	8	0	1	0	0	1	0	0	1	0.0129	Y	1	FALSE	TRUE
BRD-A48180038	trihexyphenidyl	anticholinergic, CHRM1|CHRM2|CHRM3|CHRM4|CHRM5	1128	CHRM1	cholinergic receptor muscarinic 1	Known	0.6718	0.9258	0.9747	0.9908	0.5	0.5	0.9979	8	0	1	0	0	1	1	1	1	0.0624	Y	1	FALSE	TRUE
BRD-A48570745	ivermectin	GABA receptor agonist|acetylcholine receptor allosteric modulator|GABA release stimulant|purinergic receptor allosteric modulator, CHRNA7|GABRB3|GLRA3|P2RX7	3320	HSP90AA1	heat shock protein 90 alpha family class A member 1	pQSAR	0.8317	0.9052	0.9052	0.25	0.5	0.5	0.9979	2	1	1	0	0	0	0	0	0	0.0061	N	0	TRUE	FALSE
BRD-A61304759	tanespimycin	HSP inhibitor|CHK inhibitor|HSP antagonist, HSP90AA1|CHEK1	3066	HDAC2	histone deacetylase 2	pQSAR	0.9062	0.8863	0.8863	0.1733	0.5	0.6334	0.9979	2	1	1	0	0	0	0	0	0	0.001	N	0	TRUE	FALSE
BRD-A67479912	progesterone	progesterone receptor agonist, PGR|CYP17A1|NR3C2|CATSPER1|CATSPER2|CATSPER3|CATSPER4|CYP2C19|ESR1|OPRK1|TRPC5	1577	CYP3A5	cytochrome P450 family 3 subfamily A member 5	StructureLikely	0.882	0.8938	0.9651	0.8398	0.5	0.7121	0.9979	5	1	1	0	0	1	0	0	0	0.002	N	0	TRUE	TRUE
BRD-A67479912	progesterone	progesterone receptor agonist, PGR|CYP17A1|NR3C2|CATSPER1|CATSPER2|CATSPER3|CATSPER4|CYP2C19|ESR1|OPRK1|TRPC5	2099	ESR1	estrogen receptor 1	Known	0.5821	0.9335	0.9756	0.9908	0.5	0.8919	0.9979	8	0	1	1	0	1	1	0	1	0.1587	Y	1	FALSE	TRUE
BRD-A78391468	prednisolone	glucocorticoid receptor agonist, NR3C1|NR3C2|SERPINA6	301	ANXA1	annexin A1	StructureLikely	0.6258	0.9294	0.9687	0.8499	0.5	0.5	0.9979	5	0	1	0	0	1	0	0	0	0.1031	N	0	FALSE	TRUE
BRD-K06335600	tizanidine	adrenergic receptor agonist, ADRA2A|ADRA2B|ADRA2C|CYP1A2|NISCH	150	ADRA2A	adrenoceptor alpha 2A	Known	0.6953	0.9228	0.9228	0.5452	0.5	0.5	0.9979	8	0	1	0	0	0	0	0	1	0.0473	Y	1	FALSE	TRUE
BRD-K11163873	phenanthridone	PARP inhibitor, PARP1	142	PARP1	poly(ADP-ribose) polymerase 1	Known	0.5717	0.9339	0.9339	0.6983	0.5	0.5	0.9979	8	0	1	0	0	0	0	0	1	0.1747	Y	1	FALSE	TRUE
BRD-K11636097	JNJ-7706621	CDK inhibitor|Aurora kinase inhibitor, CDK1|CDK2|AURKA|AURKB	1017	CDK2	cyclin dependent kinase 2	Known	0.7865	0.912	0.912	0.373	0.5	0.5	0.9979	8	0	1	0	0	0	0	1	1	0.0134	Y	1	FALSE	TRUE
BRD-K15014948	tranexamic-acid	fibrinogen stimulant|tissue type plasminogen activator inhibitor, PLG|FGA|FGB|FGG|PLAT	1786	DNMT1	DNA methyltransferase 1	pQSAR	0.8343	0.9047	0.9047	0.4895	0.5	0.5	0.9979	2	1	1	0	0	0	0	0	0	0.0058	N	0	TRUE	FALSE
BRD-K18895904	olanzapine	dopamine receptor antagonist|serotonin receptor antagonist, DRD2|HTR2A|HTR2C|DRD1|DRD3|DRD4|HRH1|HTR1A|HTR1B|HTR1D|HTR1E|HTR6|HTR7|ADRA1A|ADRA1B|ADRA2A|ADRA2B|ADRA2C|ADRB1|ADRB2|ADRB3|CHRM1|CHRM2|CHRM3|CHRM4|CHRM5|CYP2C8|DRD5|GABRA1|GABRA2|GABRA3|GABRA4|GABRA5|GABRA6|GABRB1|GABRB2|GABRB3|GABRD|GABRE|GABRG1|GABRG2|GABRG3|GABRP|GABRQ|HRH2|HRH4|HTR1F|HTR2B|HTR3A|HTR5A	152	ADRA2C	adrenoceptor alpha 2C	Known	0.3962	0.9458	0.9557	0.5685	0.5	0.5	0.9979	8	0	1	0	0	0	0	1	1	0.5909	Y	1	FALSE	TRUE
BRD-K26241953	piceatannol	syk inhibitor|cyclooxygenase inhibitor|nitric oxide synthase inhibitor|SIRT activator|tyrosinase inhibitor|tyrosine kinase inhibitor, ATP5A1|ATP5B|ATP5C1|IRF3|PTGS2|SIRT1|SYK|TYR	5468	PPARG	peroxisome proliferator activated receptor gamma	pQSAR	0.8613	0.8992	0.8992	0.3039	0.5	0.5	0.9979	2	1	1	0	0	0	0	0	0	0.0033	N	0	TRUE	FALSE
BRD-K28542495	benzydamine	membrane integrity inhibitor|prostanoid receptor inhibitor, PRSS1|PRSS2	801	CALM1	calmodulin 1	pQSAR	0.8268	0.9054	0.9054	0.3933	0.5	0.5	0.9979	2	1	1	0	0	0	0	0	0	0.0067	N	0	TRUE	FALSE
BRD-K32526544	DCEBIO	intermediate conductance potassium channel activator, KCNN2|KCNN3|KCNN4	2554	GABRA1	gamma-aminobutyric acid type A receptor subunit alpha1	pQSAR	0.9062	0.8867	0.8867	0.2096	0.5	0.5	0.9979	2	1	1	0	0	0	0	0	0	0.001	N	0	TRUE	FALSE
BRD-K36616567	doxepin	histamine receptor antagonist|adrenergic transmitter uptake inhibitor|histamine receptor inhibitor|norepinephrine reputake inhibitor|serotonin reuptake inhibitor|tricyclic antidepressant, HRH1|HRH2|SLC6A2|SLC6A4|ADRA1A|ADRA1B|ADRA1D|ADRA2A|ADRA2B|ADRA2C|CHRM1|CHRM2|CHRM3|CHRM4|CHRM5|CYP2C19|DRD2|HRH4|HTR1A|HTR2A|HTR2B|HTR2C|HTR6|KCNH2|SLC6A3	1128	CHRM1	cholinergic receptor muscarinic 1	Known	0.3033	0.9516	0.9756	0.9908	0.5	0.5	0.9979	8	0	1	0	0	1	1	1	1	0.8141	Y	1	FALSE	TRUE
BRD-K44779798	miglitol	glucosidase inhibitor|sodium/glucose cotransporter activator, GAA|MGAM|GANAB|GANC|SLC5A4	1577	CYP3A5	cytochrome P450 family 3 subfamily A member 5	pQSAR	0.9168	0.882	0.882	0.1298	0.5	0.5	0.9979	2	1	1	0	0	0	0	0	0	0.0007	N	0	TRUE	FALSE
BRD-K46424862	hymecromone	monoamine oxidase inhibitor, MAOA	4128	MAOA	monoamine oxidase A	Known	0.8178	0.9075	0.9075	0.538	0.5	0.5	0.9979	8	1	1	0	0	0	0	0	1	0.0079	Y	1	TRUE	TRUE
BRD-K49668410	clarithromycin	50S ribosomal subunit inhibitor, CYP2C19|CYP3A4|CYP3A5|CYP3A7	478	ATP1A3	ATPase Na+/K+ transporting subunit alpha 3	pQSAR	0.8881	0.8921	0.8921	0.1571	0.5	0.5	0.9979	2	1	1	0	0	0	0	0	0	0.0017	N	0	TRUE	FALSE
BRD-K52989797	clomipramine	serotonin transporter (SERT) inhibitor|dopamine transporter (DAT) inhibitor|norepinephrine transporter (NET) inhibitor, SLC6A4|SLC6A2|CYP2C19|GSTP1|HTR2A|HTR2B|HTR2C|SLC6A3	152	ADRA2C	adrenoceptor alpha 2C	StructureLikely	0.4339	0.9435	0.9435	0.8017	0.5	0.5	0.9979	5	0	1	0	0	1	0	0	0	0.4868	N	0	FALSE	TRUE
BRD-K52989797	clomipramine	serotonin transporter (SERT) inhibitor|dopamine transporter (DAT) inhibitor|norepinephrine transporter (NET) inhibitor, SLC6A4|SLC6A2|CYP2C19|GSTP1|HTR2A|HTR2B|HTR2C|SLC6A3	801	CALM1	calmodulin 1	StructureLikely	0.5014	0.9392	0.9504	0.8017	0.5	0.5	0.9979	5	0	1	0	0	1	0	0	0	0.3129	N	0	FALSE	TRUE
BRD-K54256913	MK-1775	wee1 kinase inhibitor, WEE1	6790	AURKA	aurora kinase A	pQSAR	0.8185	0.907	0.907	0.4514	0.5	0.5	0.9979	2	1	1	0	0	0	0	0	0	0.0078	N	0	TRUE	FALSE
BRD-K57875380	asenapine	dopamine receptor antagonist|serotonin receptor antagonist, DRD2|HTR2A|DRD1|HRH1|HTR1A|HTR1B|ADRA1A|ADRA2A|ADRA2B|ADRA2C|ADRB1|ADRB2|DRD3|DRD4|HRH2|HTR1D|HTR1E|HTR2B|HTR2C|HTR5A|HTR6|HTR7	3358	HTR2C	5-hydroxytryptamine receptor 2C	Known	0.6605	0.926	0.926	0.6321	0.5	0.5	0.9979	8	0	1	0	0	0	0	0	1	0.071	Y	1	FALSE	TRUE
BRD-K67783091	haloperidol	dopamine receptor antagonist, DRD2|DRD1|DRD3|HTR2A|CYP3A7|DRD4|DRD5|GRIN2B|HRH1|HTR1A|HTR1D|HTR2B|HTR7|KCNH1	3269	HRH1	histamine receptor H1	Known	0.6576	0.9266	0.9266	0.7043	0.5	0.6372	0.9979	8	0	1	0	0	0	0	0	1	0.0733	Y	1	FALSE	TRUE
BRD-K69116396	sertindole	dopamine receptor antagonist|serotonin receptor antagonist|adrenergic receptor antagonist, DRD2|HTR2A|HTR2C|ADRA1A|ADRA1B|ADRA1D|DRD3|DRD4|HRH1|HTR1A|HTR1B|HTR1D|HTR1E|HTR1F|HTR6|KCNH2	3269	HRH1	histamine receptor H1	Known	0.8236	0.906	0.906	0.4608	0.5	0.5	0.9979	8	1	1	0	0	0	0	0	1	0.0071	Y	1	TRUE	TRUE
BRD-K70555272	oligomycin-a	ATP synthase inhibitor|ATPase inhibitor, ATP5A1	3551	IKBKB	inhibitor of nuclear factor kappa B kinase subunit beta	pQSAR	0.8418	0.9032	0.9032	0.1611	0.5	0.4558	0.9979	2	1	1	0	0	0	0	0	0	0.005	N	0	TRUE	FALSE
BRD-K79501723	cyclizine	histamine receptor modulator, HRH1|SULT1E1	64805	P2RY12	purinergic receptor P2Y12	pQSAR	0.9168	0.8834	0.8834	0.1692	0.5	0.5	0.9979	2	1	1	0	0	0	0	0	0	0.0007	N	0	TRUE	FALSE
BRD-K81521265	dicyclohexylurea	epoxide hydolase inhibitor, EPHX2	1128	CHRM1	cholinergic receptor muscarinic 1	pQSAR	0.838	0.9042	0.9042	0.1773	0.5	0.5	0.9979	2	1	1	0	0	0	0	0	0	0.0054	N	0	TRUE	FALSE
BRD-K86858124	paclitaxel	tubulin inhibitor|microtubule stabilizing agent|microtubule stimulant|P glycoprotein inhibitor|taxane, TUBB|NR1I2|ABCB1|BCL2|CYP2C8|MAP2|MAP4|MAPT|TLR4|TUBB1	3066	HDAC2	histone deacetylase 2	pQSAR	0.882	0.8939	0.8939	0.1264	0.5	0.5	0.9979	2	1	1	0	0	0	0	0	0	0.002	N	0	TRUE	FALSE
BRD-K87024524	phenelzine	monoamine oxidase inhibitor, MAOB|AOC3|MAOA|ABAT|GAD2|GPT|GPT2|SLC6A2|SLC6A3|SLC6A4	4129	MAOB	monoamine oxidase B	Known	0.475	0.9407	0.9407	0.4967	0.5	0.5	0.9979	8	0	1	0	0	0	0	0	1	0.3773	Y	1	FALSE	TRUE
BRD-K89732114	trifluoperazine	breast cancer resistance protein inhibitor|calcium/calmodulin dependent protein kinase inhibitor|dopamine receptor|dopamine receptor antagonist|sodium channel blocker, DRD2|ABCG2|ADRA1A|CALM1|CALY|CAMK2A|DRD4|HRH1|HTR2A|HTR2C|S100A4|SCN4A|SCN9A|TNNC1	1577	CYP3A5	cytochrome P450 family 3 subfamily A member 5	pQSAR	0.8654	0.8988	0.8988	0.4824	0.5	0.5	0.9979	2	1	1	0	0	0	0	0	0	0.003	N	0	TRUE	FALSE
BRD-K95237249	probenecid	MRP inhibitor|TRPV agonist|uricosuric blocker, SLC22A6|ABCC1|PANX1|SLC22A11|SLC22A8|SLCO1C1|TRPV2	1577	CYP3A5	cytochrome P450 family 3 subfamily A member 5	pQSAR	0.8613	0.8992	0.8992	0.3933	0.5	0.5	0.9979	2	1	1	0	0	0	0	0	0	0.0033	N	0	TRUE	FALSE
BRD-K96006502	deflazacort	corticosteroid agonist, NR3C1	866	SERPINA6	serpin family A member 6	StructureLikely	0.506	0.939	0.9472	0.8298	0.5	0.5	0.9979	5	0	1	0	0	1	0	0	0	0.3021	N	0	FALSE	TRUE
BRD-A04553218	chlorphenamine	histamine receptor antagonist, HRH1|SLC6A2|SLC6A3|SLC6A4	1128	CHRM1	cholinergic receptor muscarinic 1	StructureLikely	0.6585	0.9255	0.9561	0.9146	0.5	0.5	0.9978	5	0	1	0	0	1	0	0	0	0.0726	N	0	FALSE	TRUE
BRD-A06352418	terfenadine	histamine receptor antagonist, HRH1|KCNH2|CHRM1|CHRM2|CHRM3|CHRM4|CHRM5|KCNH1	3269	HRH1	histamine receptor H1	Known	0.5452	0.9351	0.9351	0.8534	0.5	0.5	0.9978	8	0	1	0	0	1	0	1	1	0.2206	Y	1	FALSE	TRUE
BRD-A14240607	octopamine	trace amine associated receptor agonist, F10|TAAR1	134864	TAAR1	trace amine associated receptor 1	Known	0.5119	0.9368	0.9368	0.4049	0.5	0.5	0.9978	8	0	1	0	0	0	0	0	1	0.289	Y	1	FALSE	TRUE
BRD-A17065207	brefeldin-a	antibiotic that disrupts Golgi function|brefeldin A inhibited guanine nucleotide exchange protein inhibitors|golgi-specific brefeldin A-resistance guanine nucleotide exchange factor inhibitor|protein synthesis inhibitor, ARF1|ARFGEF1|ARFGEF2|CYTH2|GBF1|SAR1A	3551	IKBKB	inhibitor of nuclear factor kappa B kinase subunit beta	pQSAR	0.813	0.9065	0.9065	0.1692	0.5	0.4831	0.9978	2	1	1	0	0	0	0	0	0	0.0086	N	0	TRUE	FALSE
BRD-A19661776	mianserin	serotonin receptor antagonist|tetracyclic antidepressant, HTR2A|HTR2C|ADRA1A|ADRA1B|ADRA1D|HRH1|HTR2B|HTR6|HTR7|ADRA2A|ADRA2B|ADRA2C|DRD1|DRD2|DRD3|DRD5|HRH2|HRH4|HTR1A|HTR1F|OPRK1|SLC6A2|SLC6A3|SLC6A4	3358	HTR2C	5-hydroxytryptamine receptor 2C	Known	0.2366	0.9553	0.9553	0.814	0.5	0.5	0.9978	8	0	1	0	0	1	0	1	1	0.9166	Y	1	FALSE	TRUE
BRD-A22152765	tridihexethyl	anticholinergic, CHRM1|CHRM2|CHRM3	1131	CHRM3	cholinergic receptor muscarinic 3	Known	0.8613	0.8968	0.9336	0.7665	0.5	0.5	0.9978	8	1	1	0	0	0	0	0	1	0.0033	Y	1	TRUE	TRUE
BRD-A31800922	procyclidine	anticholinergic, CHRM1|CHRM2|CHRM3|CHRM4	1131	CHRM3	cholinergic receptor muscarinic 3	Known	0.6836	0.9229	0.9747	0.9908	0.5	0.5	0.9978	8	0	1	0	0	1	1	1	1	0.0544	Y	1	FALSE	TRUE
BRD-A37780065	triamcinolone	antiinflammatory agent|corticosteroid agonist|corticosteroid binding globulin binder|corticosteroid hormone receptor agonist|cytochrome P450 inhibitor|glucocorticoid receptor agonist|immunosuppressant|immunosuppressive agent, NR3C1|CYP3A5|CYP3A7|SERPINA6	1645	AKR1C1	aldo-keto reductase family 1 member C1	pQSAR	0.838	0.9016	0.9016	0.3381	0.5	0.5	0.9978	2	1	1	0	0	0	0	0	0	0.0054	N	0	TRUE	FALSE
BRD-A45664787	iloprost	platelet aggregation inhibitor|prostanoid receptor agonist|prostacyclin analog, PTGIR|PTGER1|PTGER2|PDE4A|PDE4B|PDE4C|PDE4D|PLAT|PTGDR|PTGER3|PTGER4|PTGFR|TBXA2R	5737	PTGFR	prostaglandin F receptor	Known	0.4849	0.9389	0.9523	0.7724	0.5	0.5	0.9978	8	0	1	0	0	0	0	0	1	0.3523	Y	1	FALSE	TRUE
BRD-A48570745	ivermectin	GABA receptor agonist|acetylcholine receptor allosteric modulator|GABA release stimulant|purinergic receptor allosteric modulator, CHRNA7|GABRB3|GLRA3|P2RX7	3326	HSP90AB1	heat shock protein 90 alpha family class B member 1	pQSAR	0.8654	0.8969	0.8969	0.25	0.5	0.5	0.9978	2	1	1	0	0	0	0	0	0	0.003	N	0	TRUE	FALSE
BRD-A55393291	testosterone	androgen receptor (AR) agonist|androgen receptor agonist|testosterone receptor agonist, AR|CYP19A1|CYP2C19|CYP2C8|CYP3A5	1577	CYP3A5	cytochrome P450 family 3 subfamily A member 5	Known	0.8626	0.8979	0.9766	0.9908	0.5	0.5	0.9978	8	1	1	0	0	1	1	0	1	0.0032	Y	1	TRUE	TRUE
BRD-A55393291	testosterone	androgen receptor (AR) agonist|androgen receptor agonist|testosterone receptor agonist, AR|CYP19A1|CYP2C19|CYP2C8|CYP3A5	2099	ESR1	estrogen receptor 1	StructureLikely	0.6243	0.9288	0.9649	0.8398	0.5	0.5	0.9978	5	0	1	0	0	1	0	0	0	0.1048	N	0	FALSE	TRUE
BRD-A57133233	chlorcyclizine	histamine receptor antagonist, HRH1	3269	HRH1	histamine receptor H1	Known	0.6183	0.9293	0.9738	0.9769	0.5	0.5	0.9978	8	0	1	0	0	1	1	0	1	0.1114	Y	1	FALSE	TRUE
BRD-A62057054	MDL-11939	serotonin receptor antagonist, HTR2A|HTR2B|HTR2C	4129	MAOB	monoamine oxidase B	pQSAR	0.8214	0.9055	0.9055	0.564	0.5	0.5	0.9978	2	1	1	0	0	0	0	0	0	0.0074	N	0	TRUE	FALSE
BRD-A64227845	SKF-77434	dopamine receptor agonist|dopamine receptor partial agonist, DRD1	1812	DRD1	dopamine receptor D1	Known	0.7004	0.921	0.9427	0.7099	0.5	0.5	0.9978	8	0	1	0	0	0	0	0	1	0.0444	Y	1	FALSE	TRUE
BRD-K05104363	PD-184352	MEK inhibitor|MAP kinase inhibitor, MAP2K1|MAP2K2|MAP3K1|MAP3K2	5604	MAP2K1	mitogen-activated protein kinase kinase 1	Known	0.9259	0.8759	0.96	0.8207	0.5	0.5	0.9978	8	1	1	0	0	1	0	1	1	0.0005	Y	1	TRUE	TRUE
BRD-K08619574	thioproperazine	dopamine receptor antagonist, ADRA1A|ADRA1B|DRD1|DRD2|HTR1A|HTR2A	1577	CYP3A5	cytochrome P450 family 3 subfamily A member 5	pQSAR	0.8428	0.9019	0.9019	0.2204	0.5	0.5	0.9978	2	1	1	0	0	0	0	0	0	0.0049	N	0	TRUE	FALSE
BRD-K09295900	BRD-K09295900		301	ANXA1	annexin A1	StructureLikely	0.6145	0.9294	0.9687	0.8499	0.5	0.5	0.9978	5	0	1	0	0	1	0	0	0	0.1158	N	0	FALSE	TRUE
BRD-K09295900	BRD-K09295900		866	SERPINA6	serpin family A member 6	StructureSure	0.6121	0.9296	0.9629	0.9908	0.5	0.5	0.9978	6	0	1	0	0	1	1	0	0	0.1186	N	0	FALSE	TRUE
BRD-K11590034	morin	antioxidant, ADORA2A|CYP1A2|ESR2|FASN|MCL1|SLC22A12	2194	FASN	fatty acid synthase	Known	0.7735	0.9126	0.9126	0.373	0.5	0.5	0.9978	8	0	1	0	0	0	0	0	1	0.0164	Y	1	FALSE	TRUE
BRD-K13688115	medrysone	corticosteroid hormone receptor agonist|glucocorticoid receptor agonist, NR3C1	1131	CHRM3	cholinergic receptor muscarinic 3	pQSAR	0.8276	0.9041	0.9041	0.1989	0.5	0.5	0.9978	2	1	1	0	0	0	0	0	0	0.0066	N	0	TRUE	FALSE
BRD-K14993104	bemegride	chemoreceptor agonist, GABRA1	3066	HDAC2	histone deacetylase 2	pQSAR	0.8613	0.8968	0.8968	0.1419	0.5	0.5	0.9978	2	1	1	0	0	0	0	0	0	0.0033	N	0	TRUE	FALSE
BRD-K19136521	indirubin	CDK inhibitor|glycogen synthase kinase inhibitor|cyclin-dependent kinase inhibitor|PKC inhibitor, CDK1|CDK5|CCNE1|CDK2|CDK4|CDK5R1|CDK9|GSK3A|GSK3B|LCK|LRRK1|LRRK2	1956	EGFR	epidermal growth factor receptor	pQSAR	0.8284	0.9044	0.933	0.5549	0.5	0.5874	0.9978	2	1	1	0	0	0	0	0	0	0.0065	N	0	TRUE	FALSE
BRD-K21733600	rofecoxib	cyclooxygenase inhibitor, PTGS2|CYP3A4|ELN	3303	HSPA1A	heat shock protein family A (Hsp70) member 1A	pQSAR	0.9062	0.885	0.885	0.1881	0.5	0.5	0.9978	2	1	1	0	0	0	0	0	0	0.001	N	0	TRUE	FALSE
BRD-K28849549	mesalazine	cyclooxygenase inhibitor|arylamine N-acetyltransferase inhibitor|beta catenin inhibitor|lipoxygenase inhibitor|prostanoid receptor inhibitor|protein phosphatase inhibitor|thromboxane receptor antagonist|thromboxane synthase inhibitor, PTGS1|PPARG|PTGS2|ALOX5|CHUK|CTNNB1|IKBKB|MPO|NAT1	5743	PTGS2	prostaglandin-endoperoxide synthase 2	Known	0.7806	0.9116	0.9681	0.8838	0.5	0.5	0.9978	8	0	1	0	0	1	0	0	1	0.0147	Y	1	FALSE	TRUE
BRD-K30240666	clemastine	histamine receptor antagonist, HRH1	1577	CYP3A5	cytochrome P450 family 3 subfamily A member 5	pQSAR	0.8599	0.8982	0.8982	0.4608	0.5	0.5	0.9978	2	1	1	0	0	0	0	0	0	0.0034	N	0	TRUE	FALSE
BRD-K32681104	2-aminobenzenesulfonamide	carbonic anhydrase B inhibitor, CA12|CA14|CA2|CA6|CA9	760	CA2	carbonic anhydrase 2	Known	0.6215	0.9286	0.9286	0.5165	0.5	0.5	0.9978	8	0	1	0	0	0	0	0	1	0.1078	Y	1	FALSE	TRUE
BRD-K34469523	levalbuterol	adrenergic receptor agonist, ADRB2	154	ADRB2	adrenoceptor beta 2	Known	0.4924	0.9387	0.9597	0.9908	0.5	0.5	0.9978	8	0	1	0	0	1	1	1	1	0.3342	Y	1	FALSE	TRUE
BRD-K37798499	etoposide	topoisomerase inhibitor|cell cycle inhibitor|DNA inhibitor|DNA intercalating drug|DNA repair enzyme inhibitor, TOP2A|CYP2E1|CYP3A5|TOP2B	7153	TOP2A	DNA topoisomerase II alpha	Known	0.9168	0.881	0.977	0.9908	0.5	0.8919	0.9978	8	1	1	1	0	1	1	0	1	0.0007	Y	1	TRUE	TRUE
BRD-K39915878	loxapine	dopamine receptor antagonist|serotonin receptor antagonist|dopamine receptor ligand, DRD2|DRD3|DRD4|DRD1|HRH1|HTR2A|HTR2C|HTR6|ADRA1A|ADRA1B|ADRA2A|ADRA2B|ADRA2C|ADRB1|CHRM1|CHRM2|CHRM3|CHRM4|CHRM5|DRD5|HRH2|HRH4|HTR1A|HTR1B|HTR1D|HTR1E|HTR3A|HTR5A|HTR7|SLC6A2|SLC6A3|SLC6A4	150	ADRA2A	adrenoceptor alpha 2A	Known	0.3258	0.949	0.9611	0.9092	0.5	0.5	0.9978	8	0	1	0	0	1	0	0	1	0.7677	Y	1	FALSE	TRUE
BRD-K46503544	etoposide	topoisomerase inhibitor|cell cycle inhibitor|DNA inhibitor|DNA intercalating drug|DNA repair enzyme inhibitor, TOP2A|CYP2E1|CYP3A5|TOP2B	3091	HIF1A	hypoxia inducible factor 1 subunit alpha	pQSAR	0.9259	0.8758	0.8758	0.1773	0.5	0.7731	0.9978	2	1	1	0	0	0	0	0	0	0.0005	N	0	TRUE	FALSE
BRD-K47036706	fluocinonide	corticosteroid agonist|corticosteroid hormone receptor agonist, NR3C1|SERPINA6|SMO	2099	ESR1	estrogen receptor 1	pQSAR	0.8317	0.9031	0.9031	0.3039	0.5	0.5	0.9978	2	1	1	0	0	0	0	0	0	0.0061	N	0	TRUE	FALSE
BRD-K56429665	calcipotriol	vitamin D receptor agonist, VDR	1131	CHRM3	cholinergic receptor muscarinic 3	pQSAR	0.946	0.865	0.865	0.1419	0.5	0.5	0.9978	2	1	1	0	0	0	0	0	0	0.0002	N	0	TRUE	FALSE
BRD-K56810756	fomepizole	alcohol dehydrogenase inhibitor, ADH1A|ADH1B|ADH1C|AKR1A1|CAT	152	ADRA2C	adrenoceptor alpha 2C	pQSAR	0.8669	0.8961	0.8961	0.1248	0.5	0.5	0.9978	2	1	1	0	0	0	0	0	0	0.0029	N	0	TRUE	FALSE
BRD-K68867920	quetiapine	dopamine receptor antagonist|serotonin receptor antagonist|adrenergic receptor antagonist|histamine receptor antagonist, DRD2|HTR1A|HTR2A|DRD1|HRH1|HTR1D|HTR1E|ADRA1A|ADRA1B|ADRA1D|ADRA2A|ADRA2B|ADRA2C|CHRM1|CHRM2|CHRM3|CHRM4|CHRM5|DRD3|DRD4|DRD5|HTR1B|HTR1F|HTR2C|HTR3A|HTR6|HTR7|SLC6A2	1128	CHRM1	cholinergic receptor muscarinic 1	Known	0.489	0.9385	0.9385	0.5504	0.5	0.5	0.9978	8	0	1	0	0	0	0	0	1	0.3423	Y	1	FALSE	TRUE
BRD-K71499074	diclofenamide	carbonic anhydrase inhibitor, CA1|CA2|CA4|CA12|CA7	760	CA2	carbonic anhydrase 2	Known	0.6279	0.9286	0.9286	0.6205	0.5	0.5	0.9978	8	0	1	0	0	0	0	0	1	0.1009	Y	1	FALSE	TRUE
BRD-K75527158	alendronic-acid	bisphosphonate|bone resorption inhibitor|osteoclast inhibitor|tyrosine phosphatase inhibitor, FDPS|PTPRS|ATP6V1A|PTPN4|PTPRE	23657	SLC7A11	solute carrier family 7 member 11	pQSAR	0.8469	0.8998	0.8998	0.1041	0.5	0.5	0.9978	2	1	1	0	0	0	0	0	0	0.0045	N	0	TRUE	FALSE
BRD-K93034159	cladribine	adenosine deaminase inhibitor|antimetabolite|DNA synthesis inhibitor|immunosuppressant|ribonucleotide reductase inhibitor, ADA|PNP|POLA1|POLE|POLE2|POLE3|POLE4|RRM1|RRM2|RRM2B	6240	RRM1	ribonucleotide reductase catalytic subunit M1	Known	0.7785	0.9119	0.944	0.8044	0.5	0.8007	0.9978	8	0	1	1	0	1	0	0	1	0.0152	Y	1	FALSE	TRUE
BRD-K95391106	prednicarbate	corticosteroid agonist|immunosuppressant|phospholipase activator, NR3C1|PLA2G1B	2908	NR3C1	nuclear receptor subfamily 3 group C member 1	Known	0.4034	0.9444	0.9626	0.9908	0.5	0.5	0.9978	8	0	1	0	0	1	1	1	1	0.5711	Y	1	FALSE	TRUE
BRD-A04020513	l-buthionine-sulfoximine	Î³-glutamylcysteine synthetase inhibitor, GCLM	5167	ENPP1	ectonucleotide pyrophosphatase/phosphodiesterase 1	pQSAR	0.8537	0.8968	0.8968	0.1202	0.5	0.44	0.9977	2	1	1	0	0	0	0	0	0	0.0039	N	0	TRUE	FALSE
BRD-A04756508	norgestimate	progesterone receptor agonist, PGR|ESR1	2099	ESR1	estrogen receptor 1	Known	0.815	0.9054	0.9364	0.9908	0.5	0.5	0.9977	8	1	1	0	0	1	1	0	1	0.0083	Y	1	TRUE	TRUE
BRD-A08062015	methyl-testosterone	androgen receptor agonist, AR	367	AR	androgen receptor	Known	0.4677	0.9386	0.9658	0.8398	0.5	0.5	0.9977	8	0	1	0	0	1	0	0	1	0.3961	Y	1	FALSE	TRUE
BRD-A10662413	prenylamine	calcium channel blocker, CALM1|MYLK2	801	CALM1	calmodulin 1	Known	0.7074	0.9199	0.9199	0.25	0.5	0.5	0.9977	8	0	1	0	0	0	0	0	1	0.0407	Y	1	FALSE	TRUE
BRD-A17655518	ibuprofen	cyclooxygenase inhibitor|NFkB pathway inhibitor, PTGS2|PTGS1|ASIC1|BCL2|CFTR|CYP2C8|FABP2|PLAT|PPARG|SLC5A8|THBD	18	ABAT	4-aminobutyrate aminotransferase	pQSAR	0.8098	0.9054	0.9054	0.4165	0.5	0.5	0.9977	2	1	1	0	0	0	0	0	0	0.0091	N	0	TRUE	FALSE
BRD-A19195498	trimipramine	adrenergic transmitter uptake inhibitor|dopamine receptor|norepinephrine transporter inhibitor|serotonin transporter (SERT) inhibitor|serotonin uptake inhibitor|tricyclic antidepressant|tricyclic antidepressant (TCA), SLC6A2|SLC6A4|SLC6A3|ADRA1A|ADRA1B|ADRA2A|ADRA2B|ADRB1|ADRB2|ADRB3|CHRM1|CHRM2|CHRM3|CHRM4|CHRM5|DRD1|DRD2|DRD5|HRH1|HTR1A|HTR1D|HTR2A|HTR2C|HTR3A	10892	MALT1	MALT1 paracaspase	pQSAR	0.8086	0.9061	0.9061	0.2204	0.5	0.5	0.9977	2	1	1	0	0	0	0	0	0	0.0093	N	0	TRUE	FALSE
BRD-A19661776	mianserin	serotonin receptor antagonist|tetracyclic antidepressant, HTR2A|HTR2C|ADRA1A|ADRA1B|ADRA1D|HRH1|HTR2B|HTR6|HTR7|ADRA2A|ADRA2B|ADRA2C|DRD1|DRD2|DRD3|DRD5|HRH2|HRH4|HTR1A|HTR1F|OPRK1|SLC6A2|SLC6A3|SLC6A4	150	ADRA2A	adrenoceptor alpha 2A	Known	0.3213	0.949	0.949	0.814	0.5	0.5	0.9977	8	0	1	0	0	1	0	1	1	0.7775	Y	1	FALSE	TRUE
BRD-A21490874	fluoxymesterone	androgen receptor agonist, AR|ESR1|NR3C1|PRLR	2908	NR3C1	nuclear receptor subfamily 3 group C member 1	Known	0.3541	0.9469	0.9596	0.8273	0.5	0.5	0.9977	8	0	1	0	0	1	0	1	1	0.7014	Y	1	FALSE	TRUE
BRD-A49225603	alimemazine	histamine receptor ligand, HRH1	152	ADRA2C	adrenoceptor alpha 2C	StructureLikely	0.4782	0.9386	0.9557	0.8734	0.5	0.5	0.9977	5	0	1	0	0	1	0	0	0	0.3692	N	0	FALSE	TRUE
BRD-A59174698	ritodrine	adrenergic receptor agonist, ADRB2	7124	TNF	tumor necrosis factor	pQSAR	0.848	0.8993	0.8993	0.581	0.5	0.5	0.9977	2	1	1	0	0	0	0	0	0	0.0044	N	0	TRUE	FALSE
BRD-A72988804	tiaprofenic-acid	cyclooxygenase inhibitor, PTGS2|PTGS1	5468	PPARG	peroxisome proliferator activated receptor gamma	pQSAR	0.8626	0.8962	0.8962	0.4165	0.5	0.5	0.9977	2	1	1	0	0	0	0	0	0	0.0032	N	0	TRUE	FALSE
BRD-A73635141	hydrocortisone	corticosteroid agonist|glucocorticoid receptor agonist|immunosuppressant|interleukin receptor antagonist, ANXA1|NOS2|NR3C1|NR3C2	301	ANXA1	annexin A1	Known	0.518	0.9355	0.9772	0.9908	0.5	0.8919	0.9977	8	0	1	1	0	1	1	0	1	0.2755	Y	1	FALSE	TRUE
BRD-A92439610	triamcinolone	antiinflammatory agent|corticosteroid agonist|corticosteroid binding globulin binder|corticosteroid hormone receptor agonist|cytochrome P450 inhibitor|glucocorticoid receptor agonist|immunosuppressant|immunosuppressive agent, NR3C1|CYP3A5|CYP3A7|SERPINA6	301	ANXA1	annexin A1	StructureLikely	0.6412	0.9252	0.9661	0.8465	0.5	0.5	0.9977	5	0	1	0	0	1	0	0	0	0.0877	N	0	FALSE	TRUE
BRD-K00198051	zuclopenthixol	dopamine receptor antagonist, DRD2|DRD1|ADRA1A|ADRA2A|DRD5|HRH1|HTR2A	1131	CHRM3	cholinergic receptor muscarinic 3	StructureLikely	0.5163	0.9361	0.9516	0.8365	0.5	0.5	0.9977	5	0	1	0	0	1	0	0	0	0.2791	N	0	FALSE	TRUE
BRD-K01663662	diphenidol	acetylcholine receptor ligand, CHRM1|CHRM3|CHRM4|CHRM2	5292	PIM1	Pim-1 proto-oncogene, serine/threonine kinase	pQSAR	0.9259	0.8756	0.8756	0.25	0.5	0.5	0.9977	2	1	1	0	0	0	0	0	0	0.0005	N	0	TRUE	FALSE
BRD-K03670461	tyrphostin-AG-82	EGFR inhibitor|epidermal growth factor receptor (EGFR) inhibitor|tyrosine kinase inhibitor, EGFR|LCK	1956	EGFR	epidermal growth factor receptor	Known	0.7023	0.9195	0.9633	0.8107	0.5	0.5	0.9977	8	0	1	0	0	1	0	0	1	0.0434	Y	1	FALSE	TRUE
BRD-K07888196	tyrphostin-AG-538	insulin growth factor receptor inhibitor|tyrosine kinase inhibitor, EGFR	1956	EGFR	epidermal growth factor receptor	Known	0.7529	0.9144	0.9683	0.8332	0.5	0.5	0.9977	8	0	1	0	0	1	0	0	1	0.0222	Y	1	FALSE	TRUE
BRD-K10995081	perphenazine	dopamine receptor|dopamine receptor antagonist, DRD2|CALM1|DRD1|HRH1|HTR2A|HTR2C|HTR6|HTR7	3358	HTR2C	5-hydroxytryptamine receptor 2C	Known	0.4467	0.94	0.9574	0.824	0.5	0.5	0.9977	8	0	1	0	0	1	0	0	1	0.4518	Y	1	FALSE	TRUE
BRD-K14888893	minoxidil	antialopecia agent|ATP channel activator|ATP-sensitive potassium channel agonist|KATP activator|Kir6 channel (KATP) activator|polarization activator|renin secretion stimulant, KCNJ8|ABCC9|KCNJ1|KCNJ10|KCNJ11|PTGS1|REN	3767	KCNJ11	potassium inwardly rectifying channel subfamily J member 11	Known	0.4041	0.9435	0.9435	0.1159	0.5	0.5	0.9977	8	0	1	0	0	0	0	0	1	0.5692	Y	1	FALSE	TRUE
BRD-K36616567	doxepin	histamine receptor antagonist|adrenergic transmitter uptake inhibitor|histamine receptor inhibitor|norepinephrine reputake inhibitor|serotonin reuptake inhibitor|tricyclic antidepressant, HRH1|HRH2|SLC6A2|SLC6A4|ADRA1A|ADRA1B|ADRA1D|ADRA2A|ADRA2B|ADRA2C|CHRM1|CHRM2|CHRM3|CHRM4|CHRM5|CYP2C19|DRD2|HRH4|HTR1A|HTR2A|HTR2B|HTR2C|HTR6|KCNH2|SLC6A3	152	ADRA2C	adrenoceptor alpha 2C	Known	0.3339	0.9477	0.9756	0.9908	0.5	0.5	0.9977	8	0	1	0	0	1	1	1	1	0.7495	Y	1	FALSE	TRUE
BRD-K38436528	imipramine	norepinephrine reputake inhibitor|serotonin reuptake inhibitor|Sodium Channel Blockers, SLC6A2|SLC6A4|CHRM2|ADRA1A|ADRA1B|ADRA1D|CHRM1|CHRM3|CHRM4|CHRM5|CYP2C19|DRD1|DRD2|DRD5|HRH1|HTR1A|HTR2A|HTR2C|HTR6|HTR7|KCND2|KCND3|KCNH1|KCNH2|SLC6A3	3358	HTR2C	5-hydroxytryptamine receptor 2C	Known	0.2839	0.9512	0.9662	0.8734	0.5	0.5	0.9977	8	0	1	0	0	1	0	1	1	0.8495	Y	1	FALSE	TRUE
BRD-K40476324	digoxin	ATPase inhibitor|ROR antagonist, ATP1A1|ABCB1|RORC|SLCO1B3	478	ATP1A3	ATPase Na+/K+ transporting subunit alpha 3	NCI60	0.4434	0.9409	0.9505	0.6405	0.5	0.8265	0.9977	3	0	1	1	0	0	0	0	0	0.4607	N	0	FALSE	TRUE
BRD-K42728290	NVP-BGJ398	FGFR inhibitor, FGFR1|FGFR2|FGFR3|FGFR4|KDR	6714	SRC	SRC proto-oncogene, non-receptor tyrosine kinase	pQSAR	0.9259	0.8746	0.8746	0.4895	0.5	0.5	0.9977	2	1	1	0	0	0	0	0	0	0.0005	N	0	TRUE	FALSE
BRD-K43887077	dopamine	dopamine receptor agonist, DRD2|DRD1|DRD3|DRD4|DRD5|DBH|HTR1A|HTR7|SLC6A2|SLC6A3|SLC6A4	367	AR	androgen receptor	pQSAR	0.8317	0.9018	0.9018	0.4049	0.5	0.5	0.9977	2	1	1	0	0	0	0	0	0	0.0061	N	0	TRUE	FALSE
BRD-K45435259	SCH-23390	dopamine receptor antagonist, DRD1|DRD5|HTR2C|KCNJ4|KCNJ6	1812	DRD1	dopamine receptor D1	Known	0.7626	0.9124	0.9637	0.8603	0.5	0.5	0.9977	8	0	1	0	0	1	0	1	1	0.0193	Y	1	FALSE	TRUE
BRD-K48578705	methyldopa	adrenergic receptor agonist, DDC|ADRA2A	231	AKR1B1	aldo-keto reductase family 1 member B	pQSAR	0.8009	0.9075	0.9075	0.3149	0.5	0.5	0.9977	2	1	1	0	0	0	0	0	0	0.0106	N	0	TRUE	FALSE
BRD-K50199947	WH-4023	src inhibitor, ABL1|LCK|SRC	5604	MAP2K1	mitogen-activated protein kinase kinase 1	pQSAR	0.913	0.8809	0.8809	0.2823	0.5	0.5	0.9977	2	1	1	0	0	0	0	0	0	0.0008	N	0	TRUE	FALSE
BRD-K54256913	MK-1775	wee1 kinase inhibitor, WEE1	1017	CDK2	cyclin dependent kinase 2	pQSAR	0.8221	0.9036	0.9036	0.2204	0.5	0.5	0.9977	2	1	1	0	0	0	0	0	0	0.0073	N	0	TRUE	FALSE
BRD-K56810756	fomepizole	alcohol dehydrogenase inhibitor, ADH1A|ADH1B|ADH1C|AKR1A1|CAT	154	ADRB2	adrenoceptor beta 2	pQSAR	0.9168	0.8795	0.8795	0.1159	0.5	0.5	0.9977	2	1	1	0	0	0	0	0	0	0.0007	N	0	TRUE	FALSE
BRD-K60762818	desipramine	norepinephrine transporter inhibitor|Sodium Channel Blockers|tricyclic antidepressant (TCA), SLC6A2|SLC6A4|ADRA1A|ADRA1B|ADRA1D|ADRA2A|ADRA2B|ADRA2C|ADRB1|ADRB2|CHRM1|CHRM2|CHRM3|CHRM4|CHRM5|DRD2|HRH1|HTR1A|HTR2A|HTR2C|SMPD1	1128	CHRM1	cholinergic receptor muscarinic 1	Known	0.4169	0.9429	0.9609	0.7724	0.5	0.5	0.9977	8	0	1	0	0	0	0	0	1	0.5337	Y	1	FALSE	TRUE
BRD-K60762818	desipramine	norepinephrine transporter inhibitor|Sodium Channel Blockers|tricyclic antidepressant (TCA), SLC6A2|SLC6A4|ADRA1A|ADRA1B|ADRA1D|ADRA2A|ADRA2B|ADRA2C|ADRB1|ADRB2|CHRM1|CHRM2|CHRM3|CHRM4|CHRM5|DRD2|HRH1|HTR1A|HTR2A|HTR2C|SMPD1	150	ADRA2A	adrenoceptor alpha 2A	Known	0.3748	0.9449	0.9488	0.6163	0.5	0.5	0.9977	8	0	1	0	0	0	0	0	1	0.6484	Y	1	FALSE	TRUE
BRD-K68867920	quetiapine	dopamine receptor antagonist|serotonin receptor antagonist|adrenergic receptor antagonist|histamine receptor antagonist, DRD2|HTR1A|HTR2A|DRD1|HRH1|HTR1D|HTR1E|ADRA1A|ADRA1B|ADRA1D|ADRA2A|ADRA2B|ADRA2C|CHRM1|CHRM2|CHRM3|CHRM4|CHRM5|DRD3|DRD4|DRD5|HTR1B|HTR1F|HTR2C|HTR3A|HTR6|HTR7|SLC6A2	3269	HRH1	histamine receptor H1	Known	0.4516	0.94	0.94	0.5685	0.5	0.5	0.9977	8	0	1	0	0	0	0	1	1	0.4385	Y	1	FALSE	TRUE
BRD-K72414522	AZD-5438	CDK inhibitor, CCNB1|CCNE1|CDK1|CDK2|KCNH2	983	CDK1	cyclin dependent kinase 1	Known	0.7692	0.912	0.912	0.1881	0.5	0.5	0.9977	8	0	1	0	0	0	0	1	1	0.0175	Y	1	FALSE	TRUE
BRD-K73991644	isoquercetin	aldose reductase inhibitor|falcipain inhibitor, AKR1B1|ACE	5743	PTGS2	prostaglandin-endoperoxide synthase 2	pQSAR	0.8927	0.8876	0.8876	0.25	0.5	0.5	0.9977	2	1	1	0	0	0	0	0	0	0.0015	N	0	TRUE	FALSE
BRD-K80970344	pyrrolidine-dithiocarbamate	NFkB pathway inhibitor, HSD11B1|RELA	5243	ABCB1	ATP binding cassette subfamily B member 1	pQSAR	0.9259	0.8754	0.8754	0.1059	0.5	0.5	0.9977	2	1	1	0	0	0	0	0	0	0.0005	N	0	TRUE	FALSE
BRD-K81418486	vorinostat	HDAC inhibitor|cell cycle inhibitor, HDAC1|HDAC2|HDAC3|HDAC6|HDAC8|HDAC10|HDAC11|HDAC5|HDAC9	55869	HDAC8	histone deacetylase 8	Known	0.6058	0.9289	0.9289	0.6489	0.8192	0.7087	0.9977	8	0	1	0	1	0	0	0	1	0.1263	Y	1	FALSE	TRUE
BRD-K85266041	DNQX	glutamate receptor antagonist, GRIA1|GRIA2|GRIK1|GRIN1|GRIN2A|GRIN2B	1956	EGFR	epidermal growth factor receptor	pQSAR	0.8178	0.9051	0.9051	0.1217	0.5	0.5	0.9977	2	1	1	0	0	0	0	0	0	0.0079	N	0	TRUE	FALSE
BRD-K87991767	umbelliferone	carbonic anhydrase inhibitor|cyclooxygenase inhibitor, CA9|CA12|PTGS2	5743	PTGS2	prostaglandin-endoperoxide synthase 2	Known	0.6822	0.9216	0.9216	0.468	0.5	0.5	0.9977	8	0	1	0	0	0	0	0	1	0.0553	Y	1	FALSE	TRUE
BRD-K88510285	bortezomib	NFkB pathway inhibitor|proteasome inhibitor|apoptosis stimulant|caspase activator, PSMB5|CASP3|CYP2C19|NFKB1|PSMB1|PSMB2|PSMD1|PSMD2|RELA	4170	MCL1	MCL1 apoptosis regulator, BCL2 family member	pQSAR	0.8951	0.8867	0.8867	0.15	0.5716	0.5941	0.9977	2	1	1	0	0	0	0	0	0	0.0014	N	0	TRUE	FALSE
BRD-K91511962	desoxycortone	mineralocorticoid receptor agonist, NR3C1|NR3C2	6347	CCL2	C-C motif chemokine ligand 2	pQSAR	0.8185	0.9042	0.9042	0.4514	0.5	0.5	0.9977	2	1	1	0	0	0	0	0	0	0.0078	N	0	TRUE	FALSE
BRD-K96319534	phentermine	adrenergic transmitter uptake inhibitor|dopamine transmitter uptake inhibitor|serotonin uptake inhibitor, MAOA|MAOB|SLC6A2|SLC6A3|SLC6A4	4128	MAOA	monoamine oxidase A	Known	0.4387	0.9407	0.9407	0.4967	0.5	0.5	0.9977	8	0	1	0	0	0	0	0	1	0.4737	Y	1	FALSE	TRUE
BRD-K98521173	desoxycortone	mineralocorticoid receptor agonist, NR3C1|NR3C2	2908	NR3C1	nuclear receptor subfamily 3 group C member 1	Known	0.5412	0.9334	0.9772	0.9908	0.5	0.5	0.9977	8	0	1	0	0	1	1	0	1	0.2281	Y	1	FALSE	TRUE
BRD-A04553218	chlorphenamine	histamine receptor antagonist, HRH1|SLC6A2|SLC6A3|SLC6A4	1131	CHRM3	cholinergic receptor muscarinic 3	StructureLikely	0.8137	0.904	0.9561	0.9146	0.5	0.5	0.9976	5	1	1	0	0	1	0	0	0	0.0085	N	0	TRUE	TRUE
BRD-A11263757	azacitidine	DNA methyltransferase inhibitor|antimetabolite|DNA methylase inhibitor|DNA synthesis inhibitor|RNA synthesis inhibitor, DNMT1	5564	PRKAB1	protein kinase AMP-activated non-catalytic subunit beta 1	pQSAR	0.8009	0.9065	0.9065	0.5165	0.5	0.5	0.9976	2	1	1	0	0	0	0	0	0	0.0106	N	0	TRUE	FALSE
BRD-A15597386	picrotoxin	GABA receptor antagonist, GABRA1|GLRA2|GLRA3|GABRR1|GLRA1|GLRB|HTR3A|HTR3B	2908	NR3C1	nuclear receptor subfamily 3 group C member 1	pQSAR	0.8469	0.897	0.897	0.1571	0.5	0.5	0.9976	2	1	1	0	0	0	0	0	0	0.0045	N	0	TRUE	FALSE
BRD-A19500257	geldanamycin	HSP inhibitor, HSP90AA1|HSP90AB1	1577	CYP3A5	cytochrome P450 family 3 subfamily A member 5	pQSAR	0.8043	0.9058	0.9058	0.3381	0.5	0.6478	0.9976	2	1	1	0	0	0	0	0	0	0.01	N	0	TRUE	FALSE
BRD-A27887842	prednisolone	glucocorticoid receptor agonist, NR3C1|NR3C2|SERPINA6	301	ANXA1	annexin A1	StructureLikely	0.6543	0.9239	0.966	0.8017	0.5	0.5	0.9976	5	0	1	0	0	1	0	0	0	0.076	N	0	FALSE	TRUE
BRD-A49447682	desoximetasone	glucocorticoid receptor agonist, NR3C1|PLA2G1B	2908	NR3C1	nuclear receptor subfamily 3 group C member 1	Known	0.2645	0.9519	0.9771	0.9908	0.5	0.5	0.9976	8	0	1	0	0	1	1	0	1	0.8802	Y	1	FALSE	TRUE
BRD-A64977602	mirtazapine	adrenergic receptor antagonist|serotonin receptor antagonist, ADRA2A|HTR2A|HTR2C|ADRA2C|HTR3A|ADRA1A|ADRA1B|ADRA1D|ADRA2B|ADRB1|ADRB2|DRD1|DRD2|DRD3|DRD5|HRH1|HRH3|HTR2B|HTR7|OPRK1|SLC6A2|SLC6A3|SLC6A4	154	ADRB2	adrenoceptor beta 2	Known	0.7949	0.907	0.907	0.4049	0.5	0.5	0.9976	8	0	1	0	0	0	0	0	1	0.0117	Y	1	FALSE	TRUE
BRD-K13027675	fluorometholone	corticosteroid agonist|glucocorticoid receptor agonist, NR3C1	866	SERPINA6	serpin family A member 6	NCI60	0.366	0.9449	0.9568	0.6843	0.5	0.8236	0.9976	3	0	1	1	0	0	0	0	0	0.6714	N	0	FALSE	TRUE
BRD-K13664374	dichloroacetic-acid	pyruvate dehydrogenase kinase inhibitor|pyruvate dehydrogenase stimulant, PDK1	7124	TNF	tumor necrosis factor	pQSAR	0.8171	0.9037	0.9037	0.1379	0.5	0.5	0.9976	2	1	1	0	0	0	0	0	0	0.008	N	0	TRUE	FALSE
BRD-K17041687	diflorasone	corticosteroid agonist|cytochrome P450 inhibitor|glucocorticoid receptor agonist|immunosuppressant, NR3C1|PLA2G1B	1577	CYP3A5	cytochrome P450 family 3 subfamily A member 5	StructureLikely	0.441	0.9397	0.9642	0.8044	0.5	0.5	0.9976	5	0	1	0	0	1	0	0	0	0.4675	N	0	FALSE	TRUE
BRD-K18895904	olanzapine	dopamine receptor antagonist|serotonin receptor antagonist, DRD2|HTR2A|HTR2C|DRD1|DRD3|DRD4|HRH1|HTR1A|HTR1B|HTR1D|HTR1E|HTR6|HTR7|ADRA1A|ADRA1B|ADRA2A|ADRA2B|ADRA2C|ADRB1|ADRB2|ADRB3|CHRM1|CHRM2|CHRM3|CHRM4|CHRM5|CYP2C8|DRD5|GABRA1|GABRA2|GABRA3|GABRA4|GABRA5|GABRA6|GABRB1|GABRB2|GABRB3|GABRD|GABRE|GABRG1|GABRG2|GABRG3|GABRP|GABRQ|HRH2|HRH4|HTR1F|HTR2B|HTR3A|HTR5A	1812	DRD1	dopamine receptor D1	Known	0.3484	0.9458	0.9557	0.5685	0.5	0.5	0.9976	8	0	1	0	0	0	0	1	1	0.7154	Y	1	FALSE	TRUE
BRD-K21401044	danazol	estrogen receptor antagonist|luteinizing hormone releasing hormone antagonist|progesterone receptor agonist|steroid derivative with antigonadotropic and anti-estrogenic activities|tumor necrosis factor modulator, ESR1|GNRHR|AR|CCL2|CYP2C8|GNRHR2|PGR|TNF	2099	ESR1	estrogen receptor 1	Known	0.6975	0.9191	0.9765	0.9908	0.5	0.5	0.9976	8	0	1	0	0	1	1	0	1	0.046	Y	1	FALSE	TRUE
BRD-K25433859	maprotiline	norepinephrine reputake inhibitor|tricyclic antidepressant (TCA), SLC6A2|ADRA1A|ADRA1B|ADRA1D|ADRA2A|ADRA2B|ADRA2C|CHRM1|CHRM2|CHRM3|CHRM4|CHRM5|DRD2|HRH1|HTR2A|HTR2C|HTR7	3269	HRH1	histamine receptor H1	Known	0.4892	0.937	0.937	0.9908	0.5	0.5	0.9976	8	0	1	0	0	1	1	0	1	0.3418	Y	1	FALSE	TRUE
BRD-K35189033	levonorgestrel	estrogen receptor agonist|glucocorticoid receptor antagonist|progesterone receptor agonist|progesterone receptor antagonist, PGR|AR|CYP2E1|ESR1|SRD5A1	2099	ESR1	estrogen receptor 1	Known	0.5304	0.9334	0.977	0.9908	0.5	0.5	0.9976	8	0	1	0	0	1	1	0	1	0.2494	Y	1	FALSE	TRUE
BRD-K36616567	doxepin	histamine receptor antagonist|adrenergic transmitter uptake inhibitor|histamine receptor inhibitor|norepinephrine reputake inhibitor|serotonin reuptake inhibitor|tricyclic antidepressant, HRH1|HRH2|SLC6A2|SLC6A4|ADRA1A|ADRA1B|ADRA1D|ADRA2A|ADRA2B|ADRA2C|CHRM1|CHRM2|CHRM3|CHRM4|CHRM5|CYP2C19|DRD2|HRH4|HTR1A|HTR2A|HTR2B|HTR2C|HTR6|KCNH2|SLC6A3	150	ADRA2A	adrenoceptor alpha 2A	Known	0.3279	0.9477	0.9756	0.9908	0.5	0.5	0.9976	8	0	1	0	0	1	1	0	1	0.763	Y	1	FALSE	TRUE
BRD-K40476324	digoxin	ATPase inhibitor|ROR antagonist, ATP1A1|ABCB1|RORC|SLCO1B3	3480	IGF1R	insulin like growth factor 1 receptor	pQSAR	0.8438	0.8978	0.8978	0.1128	0.5	0.4842	0.9976	2	1	1	0	0	0	0	0	0	0.0048	N	0	TRUE	FALSE
BRD-K47278471	diphenhydramine	histamine receptor antagonist, HRH1	116443	GRIN3A	glutamate ionotropic receptor NMDA type subunit 3A	StructureLikely	0.6238	0.9262	0.9683	0.8603	0.5	0.5	0.9976	5	0	1	0	0	1	0	0	0	0.1053	N	0	FALSE	TRUE
BRD-K54256913	MK-1775	wee1 kinase inhibitor, WEE1	5156	PDGFRA	platelet derived growth factor receptor alpha	pQSAR	0.9062	0.8815	0.8815	0.4608	0.5	0.5	0.9976	2	1	1	0	0	0	0	0	0	0.001	N	0	TRUE	FALSE
BRD-K55106630	dienestrol	estrogen receptor agonist, ESR1	1312	COMT	catechol-O-methyltransferase	pQSAR	0.9259	0.8722	0.8722	0.15	0.5	0.5	0.9976	2	1	1	0	0	0	0	0	0	0.0005	N	0	TRUE	FALSE
BRD-K55430733	WAY-629	serotonin receptor agonist, HTR2C	3358	HTR2C	5-hydroxytryptamine receptor 2C	Known	0.7281	0.9157	0.9157	0.3039	0.5	0.5	0.9976	8	0	1	0	0	0	0	0	1	0.0312	Y	1	FALSE	TRUE
BRD-K61250553	loperamide	opioid receptor agonist|atrial natriuretic peptide receptor antagonist, OPRM1|OPRD1|CACNA1A|CALM1|CYP2B6|CYP2C8|NPR2|OPRK1|POMC	3269	HRH1	histamine receptor H1	pQSAR	0.884	0.8885	0.8885	0.6913	0.5	0.5	0.9976	2	1	1	0	0	0	0	0	0	0.0019	N	0	TRUE	FALSE
BRD-K70358946	aripiprazole	serotonin receptor agonist|serotonin receptor antagonist|dopamine receptor agonist|dopamine receptor partial agonist|serotonin receptor partial agonist, DRD2|HTR1A|HTR2A|HRH1|HTR1B|HTR1D|HTR2C|ADRA1A|ADRA1B|ADRA2A|ADRA2B|ADRA2C|CHRM1|CHRM2|CHRM3|CHRM4|CHRM5|DRD1|DRD3|DRD4|DRD5|HTR1E|HTR3A|HTR6|HTR7	1128	CHRM1	cholinergic receptor muscarinic 1	Known	0.5694	0.9311	0.9311	0.4967	0.5	0.5	0.9976	8	0	1	0	0	0	0	0	1	0.1784	Y	1	FALSE	TRUE
BRD-K70401845	erlotinib	EGFR inhibitor|epidermal growth factor receptor (EGFR) inhibitor|tyrosine kinase inhibitor, EGFR|NR1I2	1956	EGFR	epidermal growth factor receptor	Known	0.8783	0.89	0.94	0.6983	0.5	0.5	0.9976	8	1	1	0	0	0	0	1	1	0.0022	Y	1	TRUE	TRUE
BRD-K72726508	arcyriaflavin-a	CDK inhibitor, CCND1|CCNE1|CDK2|CDK4	1019	CDK4	cyclin dependent kinase 4	Known	0.6263	0.9254	0.9254	0.373	0.5	0.5	0.9976	8	0	1	0	0	0	0	0	1	0.1026	Y	1	FALSE	TRUE
BRD-K74927006	cinnarizine	calcium ion channel antagonist|histamine receptor antagonist, HRH1|CACNA1C|CACNA1D|CACNA1F|CACNA1G|CACNA1H|CACNA1I|CACNA1S|CHRM1|CHRM2|CHRM3|CHRM4|CHRM5|DRD1|DRD2|DRD5	1128	CHRM1	cholinergic receptor muscarinic 1	Known	0.6999	0.9192	0.9192	0.9908	0.5	0.5	0.9976	8	0	1	0	0	1	1	0	1	0.0447	Y	1	FALSE	TRUE
BRD-K78113049	enoxacin	topoisomerase inhibitor, TOP2A	7153	TOP2A	DNA topoisomerase II alpha	Known	0.4909	0.9367	0.9623	0.8432	0.5	0.5	0.9976	8	0	1	0	0	1	0	0	1	0.3376	Y	1	FALSE	TRUE
BRD-K82261406	anisomycin	DNA synthesis inhibitor, NHP2L1|RPL10L|RPL11|RPL13A|RPL15|RPL19|RPL23|RPL23A|RPL26L1|RPL3|RPL37|RPL8|RSL24D1	3551	IKBKB	inhibitor of nuclear factor kappa B kinase subunit beta	pQSAR	0.913	0.8787	0.8787	0.3149	0.6512	0.5	0.9976	2	1	1	0	0	0	0	0	0	0.0008	N	0	TRUE	FALSE
BRD-K87024524	phenelzine	monoamine oxidase inhibitor, MAOB|AOC3|MAOA|ABAT|GAD2|GPT|GPT2|SLC6A2|SLC6A3|SLC6A4	4128	MAOA	monoamine oxidase A	Known	0.424	0.9407	0.9407	0.4967	0.5	0.5	0.9976	8	0	1	0	0	0	0	1	1	0.5141	Y	1	FALSE	TRUE
BRD-K91509126	piceatannol	syk inhibitor|cyclooxygenase inhibitor|nitric oxide synthase inhibitor|SIRT activator|tyrosinase inhibitor|tyrosine kinase inhibitor, ATP5A1|ATP5B|ATP5C1|IRF3|PTGS2|SIRT1|SYK|TYR	5770	PTPN1	protein tyrosine phosphatase non-receptor type 1	pQSAR	0.8549	0.8951	0.8951	0.4049	0.5	0.6545	0.9976	2	1	1	0	0	0	0	0	0	0.0038	N	0	TRUE	FALSE
BRD-K97564742	mepyramine	histamine receptor antagonist, HRH1	3269	HRH1	histamine receptor H1	Known	0.7939	0.9068	0.9552	0.8838	0.5	0.5	0.9976	8	0	1	0	0	1	0	0	1	0.0119	Y	1	FALSE	TRUE
BRD-A02990301	lofexidine	adrenergic receptor agonist, ADRA2A	150	ADRA2A	adrenoceptor alpha 2A	Known	0.6194	0.9258	0.9258	0.538	0.5	0.5	0.9975	8	0	1	0	0	0	0	1	1	0.1102	Y	1	FALSE	TRUE
BRD-A07765530	epinephrine	carbonic anhydrase activator|hormone|neurotransmitter, ADRA1A|ADRA1B|ADRA1D|ADRA2A|ADRA2B|ADRA2C|ADRB1|ADRB2|ADRB3|PAH|TNF	3156	HMGCR	3-hydroxy-3-methylglutaryl-CoA reductase	pQSAR	0.946	0.8602	0.8602	0.4398	0.5	0.5	0.9975	2	1	1	0	0	0	0	0	0	0.0002	N	0	TRUE	FALSE
BRD-A07932845	metitepine	anti-HCVE2, HTR5A|HTR6|HTR7|HTR1A|HTR1B|HTR1D|HTR1E|HTR1F|HTR2A|HTR2B|HTR2C	3358	HTR2C	5-hydroxytryptamine receptor 2C	Known	0.4445	0.9384	0.9384	0.6363	0.5	0.5	0.9975	8	0	1	0	0	0	0	1	1	0.4577	Y	1	FALSE	TRUE
BRD-A16311756	profenamine	butyrylcholinesterase inhibitors|cholinergic receptor antagonist|glutamate receptor antagonist, CHRM1|BCHE|CHRM2|GRIN3A	801	CALM1	calmodulin 1	StructureLikely	0.7002	0.9172	0.968	0.8207	0.5	0.5	0.9975	5	0	1	0	0	1	0	0	0	0.0445	N	0	FALSE	TRUE
BRD-A67373739	AICA-ribonucleotide	adenosine release stimulant|AMPK stimulant, ATIC|PRKAA1	136	ADORA2B	adenosine A2b receptor	pQSAR	0.8669	0.8917	0.8917	0.3381	0.5	0.5	0.9975	2	1	1	0	0	0	0	0	0	0.0029	N	0	TRUE	FALSE
BRD-A67799922	phenoxybenzamine	adrenergic receptor antagonist, ADRA2B|ADRA1A|ADRA1B|ADRA1D|ADRA2A|ADRA2C|ADRB2|CALM1	801	CALM1	calmodulin 1	Known	0.5342	0.9318	0.9318	0.5165	0.5	0.5	0.9975	8	0	1	0	0	0	0	0	1	0.2419	Y	1	FALSE	TRUE
BRD-K01493881	apigenin	casein kinase inhibitor|cell proliferation inhibitor|cytochrome P450 inhibitor|GABA receptor antagonist|glutamate receptor antagonist|monoamine oxidase inhibitor|nitric oxide production inhibitor|ornithine decarboxylase inhibitor|quorum sensing signaling modulator|VEGF expression inhibitor|xanthine oxidase inhibitor, AKR1B1|AR|CDK6|CFTR|CYP19A1|CYP1A2|CYP1B1|HSD17B1|MAOA|ODC1|XDH	6713	SQLE	squalene epoxidase	pQSAR	0.813	0.9023	0.9023	0.2823	0.5	0.5	0.9975	2	1	1	0	0	0	0	0	0	0.0086	N	0	TRUE	FALSE
BRD-K05236810	luteolin	aldose reductase inhibitor|glucosidase inhibitor|monoamine oxidase inhibitor|xanthine oxidase inhibitor, AKR1B1|GAA|MAOA|TOP1|XDH	1956	EGFR	epidermal growth factor receptor	pQSAR	0.8171	0.9012	0.9607	0.7635	0.5	0.5	0.9975	2	1	1	0	0	0	0	0	0	0.008	N	0	TRUE	FALSE
BRD-K11636097	JNJ-7706621	CDK inhibitor|Aurora kinase inhibitor, CDK1|CDK2|AURKA|AURKB	983	CDK1	cyclin dependent kinase 1	Known	0.7462	0.912	0.912	0.1652	0.5	0.5	0.9975	8	0	1	0	0	0	0	1	1	0.0244	Y	1	FALSE	TRUE
BRD-K15010214	emedastine	histamine receptor antagonist, HRH1	3269	HRH1	histamine receptor H1	Known	0.8221	0.9008	0.9008	0.5165	0.5	0.5	0.9975	8	1	1	0	0	0	0	0	1	0.0073	Y	1	TRUE	TRUE
BRD-K15108141	gemcitabine	cell cycle inhibitor|DNA repair enzyme inhibitor|DNA synthesis inhibitor|pyrimidine antagonist|ribonucleoside reductase inhibitor|ribonucleotide reductase inhibitor, RRM1|CMPK1|RRM2|TYMS	6241	RRM2	ribonucleotide reductase regulatory subunit M2	Known	0.7513	0.9119	0.9119	0.3933	0.5	0.5	0.9975	8	0	1	0	0	0	0	0	1	0.0227	Y	1	FALSE	TRUE
BRD-K17743125	belinostat	HDAC inhibitor|cell cycle inhibitor, HDAC1|HDAC2|HDAC3|HDAC4|HDAC5|HDAC6|HDAC7|HDAC8|HDAC9	10013	HDAC6	histone deacetylase 6	Known	0.5745	0.9289	0.9289	0.5549	0.5	0.7576	0.9975	8	0	1	0	0	0	0	1	1	0.1702	Y	1	FALSE	TRUE
BRD-K18895904	olanzapine	dopamine receptor antagonist|serotonin receptor antagonist, DRD2|HTR2A|HTR2C|DRD1|DRD3|DRD4|HRH1|HTR1A|HTR1B|HTR1D|HTR1E|HTR6|HTR7|ADRA1A|ADRA1B|ADRA2A|ADRA2B|ADRA2C|ADRB1|ADRB2|ADRB3|CHRM1|CHRM2|CHRM3|CHRM4|CHRM5|CYP2C8|DRD5|GABRA1|GABRA2|GABRA3|GABRA4|GABRA5|GABRA6|GABRB1|GABRB2|GABRB3|GABRD|GABRE|GABRG1|GABRG2|GABRG3|GABRP|GABRQ|HRH2|HRH4|HTR1F|HTR2B|HTR3A|HTR5A	150	ADRA2A	adrenoceptor alpha 2A	Known	0.3445	0.9458	0.9557	0.5685	0.5	0.5	0.9975	8	0	1	0	0	0	0	0	1	0.7247	Y	1	FALSE	TRUE
BRD-K19540840	saracatinib	src inhibitor|Abl kinase inhibitor, SRC|ABL1|LCK|YES1	1956	EGFR	epidermal growth factor receptor	pIC50	0.8459	0.8961	0.8961	0.5236	0.5	0.5	0.9975	7	1	1	0	0	0	0	1	0	0.0046	N	0	TRUE	TRUE
BRD-K24844714	fluorouracil	dihydropyrimidine dehydrogenase inhibitor|pyrimidine antagonist|RNA synthesis inhibitor|thymidylate synthase inhibitor, DPYD|TYMS|CD44	3614	IMPDH1	inosine monophosphate dehydrogenase 1	pQSAR	0.9168	0.8754	0.8754	0.1217	0.5	0.7733	0.9975	2	1	1	0	0	0	0	0	0	0.0007	N	0	TRUE	FALSE
BRD-K27218697	rimexolone	glucocorticoid receptor agonist|immunosuppressant|mineralocorticoid receptor agonist, NR3C1|SERPINA6	866	SERPINA6	serpin family A member 6	Known	0.5023	0.9347	0.9646	0.9908	0.5	0.5	0.9975	8	0	1	0	0	1	1	0	1	0.3107	Y	1	FALSE	TRUE
BRD-K28761384	zuclopenthixol	dopamine receptor antagonist, DRD2|DRD1|ADRA1A|ADRA2A|DRD5|HRH1|HTR2A	1812	DRD1	dopamine receptor D1	Known	0.355	0.9451	0.9609	0.9908	0.5	0.5	0.9975	8	0	1	0	0	1	1	0	1	0.699	Y	1	FALSE	TRUE
BRD-K28936863	ketotifen	histamine receptor ligand|leukotriene antagonist|phosphodiesterase inhibitor, HRH1|PDE4A|PDE4B|PDE4C|PDE4D|PDE7A|PDE7B|PDE8A|PDE8B|PGD	3269	HRH1	histamine receptor H1	Known	0.703	0.9169	0.927	0.5901	0.5	0.5	0.9975	8	0	1	0	0	0	0	1	1	0.043	Y	1	FALSE	TRUE
BRD-K32610195	androstenedione	cytochrome P450 inhibitor, AKR1C3|HSD17B1|HSD3B1	367	AR	androgen receptor	StructureLikely	0.6577	0.9223	0.9652	0.8044	0.5	0.5	0.9975	5	0	1	0	0	1	0	0	0	0.0732	N	0	FALSE	TRUE
BRD-K37814297	acepromazine	dopamine receptor antagonist, ADRA1A|ADRA1B|DRD1|DRD2|HTR1A|HTR2A	1128	CHRM1	cholinergic receptor muscarinic 1	StructureLikely	0.5223	0.9336	0.9567	0.8073	0.5	0.5	0.9975	5	0	1	0	0	1	0	0	0	0.2664	N	0	FALSE	TRUE
BRD-K37949327	etidronic-acid	bisphosphonate|bone resorption inhibitor|farnesyl pyrophosphate synthase inhibitors|hypercalcaemic agent|osteoclast inhibitor, PTPRS|ATP6V1A|FDPS	523	ATP6V1A	ATPase H+ transporting V1 subunit A	Known	0.272	0.9506	0.9506	0.4967	0.5	0.5	0.9975	8	0	1	0	0	0	0	0	1	0.8689	Y	1	FALSE	TRUE
BRD-K38775274	dexamethasone	glucocorticoid receptor agonist|corticosteroid agonist|immunosuppressant, ANXA1|CYP3A4|CYP3A5|NOS2|NR0B1|NR3C1|NR3C2	2908	NR3C1	nuclear receptor subfamily 3 group C member 1	Known	0.6119	0.9257	0.975	0.9908	0.5	0.8919	0.9975	8	0	1	1	0	1	1	1	1	0.1189	Y	1	FALSE	TRUE
BRD-K39915878	loxapine	dopamine receptor antagonist|serotonin receptor antagonist|dopamine receptor ligand, DRD2|DRD3|DRD4|DRD1|HRH1|HTR2A|HTR2C|HTR6|ADRA1A|ADRA1B|ADRA2A|ADRA2B|ADRA2C|ADRB1|CHRM1|CHRM2|CHRM3|CHRM4|CHRM5|DRD5|HRH2|HRH4|HTR1A|HTR1B|HTR1D|HTR1E|HTR3A|HTR5A|HTR7|SLC6A2|SLC6A3|SLC6A4	2568	GABRP	gamma-aminobutyric acid type A receptor subunit pi	StructureLikely	0.3387	0.9458	0.9584	0.9092	0.5	0.5	0.9975	5	0	1	0	0	1	0	0	0	0.7383	N	0	FALSE	TRUE
BRD-K49668410	clarithromycin	50S ribosomal subunit inhibitor, CYP2C19|CYP3A4|CYP3A5|CYP3A7	3320	HSP90AA1	heat shock protein 90 alpha family class A member 1	pQSAR	0.8276	0.9003	0.9003	0.1217	0.5	0.5	0.9975	2	1	1	0	0	0	0	0	0	0.0066	N	0	TRUE	FALSE
BRD-K51223576	AG-99	tyrosine kinase inhibitor, EGFR	1956	EGFR	epidermal growth factor receptor	Known	0.6777	0.9199	0.9683	0.8332	0.5	0.8208	0.9975	8	0	1	1	0	1	0	0	1	0.0583	Y	1	FALSE	TRUE
BRD-K63675182	triflupromazine	acetylcholine receptor ligand|dopamine receptor, HTR2B|CHRM1|CHRM2|CHRNA7|DRD1|DRD2	5293	PIK3CD	phosphatidylinositol-4,5-bisphosphate 3-kinase catalytic subunit delta	pQSAR	0.8092	0.9031	0.9031	0.1652	0.5	0.5	0.9975	2	1	1	0	0	0	0	0	0	0.0092	N	0	TRUE	FALSE
BRD-K64052750	gefitinib	EGFR inhibitor, EGFR|CYP2C19	25	ABL1	ABL proto-oncogene 1, non-receptor tyrosine kinase	pQSAR	0.8428	0.8961	0.8961	0.6606	0.5	0.6273	0.9975	2	1	1	0	0	0	0	0	0	0.0049	N	0	TRUE	FALSE
BRD-K66615216	moxifloxacin	DNA gyrase inhibitor|topoisomerase inhibitor, TOP2A	7153	TOP2A	DNA topoisomerase II alpha	Known	0.5426	0.9318	0.9563	0.7128	0.5	0.5	0.9975	8	0	1	0	0	0	0	0	1	0.2255	Y	1	FALSE	TRUE
BRD-K67868012	PI-103	PI3K inhibitor|mTOR inhibitor, PIK3CA|PIK3CG|MTOR|PIK3CB|PIK3CD|PRKDC	2475	MTOR	mechanistic target of rapamycin kinase	Known	0.946	0.8584	0.8584	0.3149	0.5	0.5	0.9975	8	1	1	0	0	0	0	1	1	0.0002	Y	1	TRUE	TRUE
BRD-K84175871	pseudoephedrine	histamine receptor antagonist|interleukin expression inhibitor|tumor necrosis factor expression inhibitor, ADRA1A|ADRA2A|ADRB1|ADRB2|ATF1|ATF2|ATF3|ATF4|ATF5|ATF6|ATF7|CXCL8|FOS|HRH1|IL2|JDP2|JUN|NFATC1|SLC6A2|SLC6A3|SLC6A4|TNF	150	ADRA2A	adrenoceptor alpha 2A	Known	0.4983	0.9351	0.9351	0.6983	0.5	0.5	0.9975	8	0	1	0	0	0	0	0	1	0.3201	Y	1	FALSE	TRUE
BRD-K89104321	gaboxadol	GABA receptor agonist|GABA receptor partial agonist, GABRD|GABRA1|GABRA2|GABRA3|GABRA4|GABRA5|GABRA6|GABRR1|GABRR2|GABRR3	10587	TXNRD2	thioredoxin reductase 2	pQSAR	0.9259	0.8716	0.8716	0.1062	0.5	0.5	0.9975	2	1	1	0	0	0	0	0	0	0.0005	N	0	TRUE	FALSE
BRD-A17655518	ibuprofen	cyclooxygenase inhibitor|NFkB pathway inhibitor, PTGS2|PTGS1|ASIC1|BCL2|CFTR|CYP2C8|FABP2|PLAT|PPARG|SLC5A8|THBD	1128	CHRM1	cholinergic receptor muscarinic 1	pQSAR	0.8951	0.8823	0.8823	0.1989	0.5	0.5	0.9974	2	1	1	0	0	0	0	0	0	0.0014	N	0	TRUE	FALSE
BRD-A20243730	danazol	estrogen receptor antagonist|luteinizing hormone releasing hormone antagonist|progesterone receptor agonist|steroid derivative with antigonadotropic and anti-estrogenic activities|tumor necrosis factor modulator, ESR1|GNRHR|AR|CCL2|CYP2C8|GNRHR2|PGR|TNF	3551	IKBKB	inhibitor of nuclear factor kappa B kinase subunit beta	pQSAR	0.8067	0.9018	0.9018	0.4282	0.5	0.5	0.9974	2	1	1	0	0	0	0	0	0	0.0096	N	0	TRUE	FALSE
BRD-A49225603	alimemazine	histamine receptor ligand, HRH1	1128	CHRM1	cholinergic receptor muscarinic 1	StructureLikely	0.3719	0.9425	0.9642	0.8734	0.5	0.5	0.9974	5	0	1	0	0	1	0	0	0	0.6559	N	0	FALSE	TRUE
BRD-A65597028	RX-821002	adrenergic receptor antagonist, ADRA2A|ADRA2B|ADRA2C|ADRA1A|ADRA1B|ADRA1D	3269	HRH1	histamine receptor H1	pQSAR	0.884	0.8852	0.8852	0.5021	0.5	0.5	0.9974	2	1	1	0	0	0	0	0	0	0.0019	N	0	TRUE	FALSE
BRD-A81866333	CGS-21680	adenosine receptor agonist, ADORA2A|ADORA1|ADORA2B|ADORA3	217	ALDH2	aldehyde dehydrogenase 2 family member	pQSAR	0.8428	0.8953	0.8953	0.4514	0.5	0.5	0.9974	2	1	1	0	0	0	0	0	0	0.0049	N	0	TRUE	FALSE
BRD-K01095011	finasteride	5 alpha reductase inhibitor|androgen receptor antagonist|steroid 5alpha-reductase inhibitor, SRD5A2|SRD5A1|AKR1D1|AR	1645	AKR1C1	aldo-keto reductase family 1 member C1	pQSAR	0.815	0.901	0.901	0.4752	0.5	0.5	0.9974	2	1	1	0	0	0	0	0	0	0.0083	N	0	TRUE	FALSE
BRD-K01095011	finasteride	5 alpha reductase inhibitor|androgen receptor antagonist|steroid 5alpha-reductase inhibitor, SRD5A2|SRD5A1|AKR1D1|AR	367	AR	androgen receptor	Known	0.6735	0.9193	0.9765	0.9908	0.5	0.5	0.9974	8	0	1	0	0	1	1	0	1	0.0612	Y	1	FALSE	TRUE
BRD-K01292756	pimozide	dopamine receptor antagonist|dopamine receptor|opioid receptor antagonist|serotonin receptor antagonist, DRD2|DRD3|CACNA1I|CALM1|HRH1|HTR1A|HTR2A|KCNA10|KCNH2	3269	HRH1	histamine receptor H1	Known	0.7439	0.9117	0.9335	0.6571	0.5	0.7085	0.9974	8	0	1	0	0	0	0	0	1	0.0252	Y	1	FALSE	TRUE
BRD-K01663662	diphenidol	acetylcholine receptor ligand, CHRM1|CHRM3|CHRM4|CHRM2	775	CACNA1C	calcium voltage-gated channel subunit alpha1 C	pQSAR	0.8361	0.8974	0.8974	0.2204	0.5	0.5	0.9974	2	1	1	0	0	0	0	0	0	0.0056	N	0	TRUE	FALSE
BRD-K02265150	amoxapine	adrenergic transmitter uptake inhibitor|dopamine receptor|norepinephrine reputake inhibitor|serotonin receptor antagonist|serotonin reuptake inhibitor|serotonin uptake inhibitor|tricyclic antidepressant, SLC6A2|SLC6A4|HTR2A|HTR6|ADRA1A|ADRA1B|ADRA1D|ADRA2A|ADRA2B|ADRA2C|CHRM1|CHRM2|CHRM3|CHRM4|CHRM5|DRD1|DRD2|DRD3|DRD4|GABRA1|GABRA2|GABRA3|GABRA4|GABRA5|GABRA6|GABRB1|GABRB2|GABRB3|GABRD|GABRE|GAB…	152	ADRA2C	adrenoceptor alpha 2C	Known	0.536	0.9308	0.9584	0.9092	0.5	0.5	0.9974	8	0	1	0	0	1	0	0	1	0.2382	Y	1	FALSE	TRUE
BRD-K04923131	GSK-3-inhibitor-IX	glycogen synthase kinase inhibitor|lipoxygenase inhibitor|PKC inhibitor, ALOX5|GSK3A|GSK3B	120892	LRRK2	leucine rich repeat kinase 2	StructureLikely	0.8361	0.8973	0.9421	0.9031	0.6078	0.6926	0.9974	5	1	1	0	0	1	0	0	0	0.0056	N	0	TRUE	TRUE
BRD-K05396879	15-delta-prostaglandin-j2	PPAR receptor agonist|FXR antagonist, PPARG|NR1H4	3551	IKBKB	inhibitor of nuclear factor kappa B kinase subunit beta	pQSAR	0.8086	0.9022	0.9022	0.2823	0.5	0.6663	0.9974	2	1	1	0	0	0	0	0	0	0.0093	N	0	TRUE	FALSE
BRD-K10042277	desmethylclozapine	acetylcholine receptor agonist|dopamine receptor agonist|dopamine receptor antagonist|dopamine receptor partial agonist|serotonin receptor antagonist|serotonin receptor inverse agonist, CHRM1|DRD2|DRD3|HTR2A	3269	HRH1	histamine receptor H1	StructureLikely	0.5552	0.9299	0.9561	0.9176	0.5	0.5	0.9974	5	0	1	0	0	1	0	0	0	0.2023	N	0	FALSE	TRUE
BRD-K28143534	cyproheptadine	histamine receptor antagonist|serotonin receptor antagonist, HRH1|ADRA1A|ADRA1B|ADRA1D|CHRM1|CHRM2|CHRM3|HTR2A|HTR2B|HTR2C|HTR6|HTR7	1128	CHRM1	cholinergic receptor muscarinic 1	Known	0.4267	0.9392	0.9392	0.4752	0.5	0.5	0.9974	8	0	1	0	0	0	0	0	1	0.5067	Y	1	FALSE	TRUE
BRD-K32906660	bis-tyrphostin	EGFR inhibitor|dynamin GTPase inhibitor, DNM1|EGFR	231	AKR1B1	aldo-keto reductase family 1 member B	pQSAR	0.8881	0.8837	0.8837	0.2931	0.5	0.5	0.9974	2	1	1	0	0	0	0	0	0	0.0017	N	0	TRUE	FALSE
BRD-K33299843	naproxen	cyclooxygenase inhibitor, PTGS2|PTGS1	760	CA2	carbonic anhydrase 2	pQSAR	0.8343	0.8977	0.8977	0.373	0.5	0.5	0.9974	2	1	1	0	0	0	0	0	0	0.0058	N	0	TRUE	FALSE
BRD-K37289225	clozapine	serotonin receptor antagonist|dopamine receptor antagonist|adrenergic receptor antagonist, DRD2|DRD4|ADRA1A|ADRA1B|CHRM1|DRD1|DRD3|HRH1|HRH4|HTR1A|HTR1B|HTR1D|HTR1E|HTR2A|HTR2C|HTR6|HTR7|ADRA1D|ADRA2A|ADRA2B|ADRA2C|CALY|CHRM2|CHRM3|CHRM4|CHRM5|CYP2C19|DRD5|HTR1F|HTR2B|HTR3A|HTR5A	152	ADRA2C	adrenoceptor alpha 2C	Known	0.38	0.9427	0.9611	0.7778	0.5	0.5	0.9974	8	0	1	0	0	0	0	1	1	0.6346	Y	1	FALSE	TRUE
BRD-K52989797	clomipramine	serotonin transporter (SERT) inhibitor|dopamine transporter (DAT) inhibitor|norepinephrine transporter (NET) inhibitor, SLC6A4|SLC6A2|CYP2C19|GSTP1|HTR2A|HTR2B|HTR2C|SLC6A3	1128	CHRM1	cholinergic receptor muscarinic 1	pIC50	0.2405	0.9524	0.9625	0.8734	0.5	0.5	0.9974	7	0	1	0	0	1	0	1	0	0.912	N	0	FALSE	TRUE
BRD-K55930204	phenytoin	sodium channel blocker, ABCB1|CYP2B6|CYP2C19|CYP3A4|SCN1A|SCN2A|SCN5A	3551	IKBKB	inhibitor of nuclear factor kappa B kinase subunit beta	pQSAR	0.946	0.8578	0.8578	0.1652	0.5	0.5	0.9974	2	1	1	0	0	0	0	0	0	0.0002	N	0	TRUE	FALSE
BRD-K57875380	asenapine	dopamine receptor antagonist|serotonin receptor antagonist, DRD2|HTR2A|DRD1|HRH1|HTR1A|HTR1B|ADRA1A|ADRA2A|ADRA2B|ADRA2C|ADRB1|ADRB2|DRD3|DRD4|HRH2|HTR1D|HTR1E|HTR2B|HTR2C|HTR5A|HTR6|HTR7	150	ADRA2A	adrenoceptor alpha 2A	Known	0.5973	0.926	0.926	0.6321	0.5	0.5	0.9974	8	0	1	0	0	0	0	0	1	0.1372	Y	1	FALSE	TRUE
BRD-K64451768	GANT-58	GLI antagonist, DHH|GLI1|IHH	142	PARP1	poly(ADP-ribose) polymerase 1	pQSAR	0.946	0.8582	0.8582	0.2312	0.5	0.5	0.9974	2	1	1	0	0	0	0	0	0	0.0002	N	0	TRUE	FALSE
BRD-K64994968	progesterone	progesterone receptor agonist, PGR|CYP17A1|NR3C2|CATSPER1|CATSPER2|CATSPER3|CATSPER4|CYP2C19|ESR1|OPRK1|TRPC5	367	AR	androgen receptor	pIC50	0.6396	0.9227	0.958	0.8398	0.5	0.5001	0.9974	7	0	1	0	0	1	0	1	0	0.0892	N	0	FALSE	TRUE
BRD-K67783091	haloperidol	dopamine receptor antagonist, DRD2|DRD1|DRD3|HTR2A|CYP3A7|DRD4|DRD5|GRIN2B|HRH1|HTR1A|HTR1D|HTR2B|HTR7|KCNH1	185	AGTR1	angiotensin II receptor type 1	pQSAR	0.9095	0.8758	0.8758	0.1264	0.5	0.5	0.9974	2	1	1	0	0	0	0	0	0	0.0009	N	0	TRUE	FALSE
BRD-K67919934	spironolactone	mineralocorticoid receptor antagonist|androgen receptor antagonist|potassium channel blocker, NR3C2|AR|CACNA1A|CACNA1B|CACNA1C|CACNA1D|CACNA1F|CACNA1G|CACNA1H|CACNA1I|CACNA1S|CACNA2D1|CACNA2D2|CACNA2D3|CACNB1|CACNB2|CACNB3|CACNB4|CACNG1|CYP11B2|KCNA5|KCND3|NR3C1|PGR|SCNN1A|SHBG	866	SERPINA6	serpin family A member 6	pQSAR	0.83	0.8976	0.8976	0.2608	0.5	0.5	0.9974	2	1	1	0	0	0	0	0	0	0.0063	N	0	TRUE	FALSE
BRD-K68202742	trichostatin-a	HDAC inhibitor|CDK expression enhancer|ID1 expression inhibitor, HDAC7|HDAC8|HDAC1|HDAC10|HDAC2|HDAC3|HDAC4|HDAC5|HDAC6|HDAC9	10013	HDAC6	histone deacetylase 6	Known	0.9095	0.8758	0.9741	0.9908	0.5	0.8919	0.9974	8	1	1	1	0	1	1	1	1	0.0009	Y	1	TRUE	TRUE
BRD-K70358946	aripiprazole	serotonin receptor agonist|serotonin receptor antagonist|dopamine receptor agonist|dopamine receptor partial agonist|serotonin receptor partial agonist, DRD2|HTR1A|HTR2A|HRH1|HTR1B|HTR1D|HTR2C|ADRA1A|ADRA1B|ADRA2A|ADRA2B|ADRA2C|CHRM1|CHRM2|CHRM3|CHRM4|CHRM5|DRD1|DRD3|DRD4|DRD5|HTR1E|HTR3A|HTR6|HTR7	150	ADRA2A	adrenoceptor alpha 2A	Known	0.5416	0.9311	0.9311	0.5236	0.5	0.5	0.9974	8	0	1	0	0	0	0	1	1	0.2274	Y	1	FALSE	TRUE
BRD-K71350836	butalbital	barbiturate, binds to the GABA receptor and enhances the inhibitory effect of GABA, GABRA1|CHRNA4|CHRNA7|GABRA2|GABRA3|GABRA4|GABRA5|GABRA6|GABRB1|GABRB2|GABRB3|GABRD|GABRE|GABRG1|GABRG2|GABRG3|GABRP|GABRQ|GRIA2|GRIK2	2554	GABRA1	gamma-aminobutyric acid type A receptor subunit alpha1	Known	0.5925	0.9269	0.9269	0.5236	0.5	0.5	0.9974	8	0	1	0	0	0	0	0	1	0.1437	Y	1	FALSE	TRUE
BRD-K75958195	pizotifen	serotonin receptor antagonist, HTR2A|HTR1A|HTR2C	185	AGTR1	angiotensin II receptor type 1	pQSAR	0.8418	0.8961	0.8961	0.1419	0.5	0.5	0.9974	2	1	1	0	0	0	0	0	0	0.005	N	0	TRUE	FALSE
BRD-K83257731	chloropyramine	focal adhesion kinase inhibitor|histamine receptor antagonist, HRH1	3269	HRH1	histamine receptor H1	Known	0.7104	0.915	0.9631	0.9146	0.5	0.5	0.9974	8	0	1	0	0	1	0	0	1	0.0392	Y	1	FALSE	TRUE
BRD-K91370081	anisomycin	DNA synthesis inhibitor, NHP2L1|RPL10L|RPL11|RPL13A|RPL15|RPL19|RPL23|RPL23A|RPL26L1|RPL3|RPL37|RPL8|RSL24D1	10383	TUBB4B	tubulin beta 4B class IVb	pQSAR	0.83	0.8979	0.8979	0.1571	0.5	0.5	0.9974	2	1	1	0	0	0	0	0	0	0.0063	N	0	TRUE	FALSE
BRD-K91509126	piceatannol	syk inhibitor|cyclooxygenase inhibitor|nitric oxide synthase inhibitor|SIRT activator|tyrosinase inhibitor|tyrosine kinase inhibitor, ATP5A1|ATP5B|ATP5C1|IRF3|PTGS2|SIRT1|SYK|TYR	7153	TOP2A	DNA topoisomerase II alpha	pQSAR	0.9062	0.8772	0.8772	0.3039	0.5	0.6392	0.9974	2	1	1	0	0	0	0	0	0	0.001	N	0	TRUE	FALSE
BRD-K91740057	felbinac	cyclooxygenase inhibitor|platelet aggregation inhibitor|prostanoid receptor inhibitor, CTSL	7056	THBD	thrombomodulin	pQSAR	0.826	0.8984	0.8984	0.3265	0.5	0.5	0.9974	2	1	1	0	0	0	0	0	0	0.0068	N	0	TRUE	FALSE
BRD-K95851186	CGP-13501	GABA receptor modulator, GABBR1	3932	LCK	LCK proto-oncogene, Src family tyrosine kinase	pQSAR	0.8171	0.9	0.9	0.1611	0.5	0.5	0.9974	2	1	1	0	0	0	0	0	0	0.008	N	0	TRUE	FALSE
BRD-K99300445	antazoline	histamine receptor antagonist, HRH1	150	ADRA2A	adrenoceptor alpha 2A	pQSAR	0.8117	0.9011	0.9522	0.7576	0.5	0.5	0.9974	2	1	1	0	0	0	0	0	0	0.0088	N	0	TRUE	FALSE
BRD-A17819071	gedunin	HSP inhibitor, HSP90AA1	3320	HSP90AA1	heat shock protein 90 alpha family class A member 1	Known	0.6486	0.9206	0.9206	0.4967	0.5	0.5	0.9973	8	0	1	0	0	0	0	0	1	0.0809	Y	1	FALSE	TRUE
BRD-A19195498	trimipramine	adrenergic transmitter uptake inhibitor|dopamine receptor|norepinephrine transporter inhibitor|serotonin transporter (SERT) inhibitor|serotonin uptake inhibitor|tricyclic antidepressant|tricyclic antidepressant (TCA), SLC6A2|SLC6A4|SLC6A3|ADRA1A|ADRA1B|ADRA2A|ADRA2B|ADRB1|ADRB2|ADRB3|CHRM1|CHRM2|CHRM3|CHRM4|CHRM5|DRD1|DRD2|DRD5|HRH1|HTR1A|HTR1D|HTR2A|HTR2C|HTR3A	150	ADRA2A	adrenoceptor alpha 2A	Known	0.372	0.9421	0.9488	0.6878	0.5	0.5	0.9973	8	0	1	0	0	0	0	0	1	0.6556	Y	1	FALSE	TRUE
BRD-A21490874	fluoxymesterone	androgen receptor agonist, AR|ESR1|NR3C1|PRLR	2099	ESR1	estrogen receptor 1	Known	0.4682	0.9354	0.9354	0.4895	0.5	0.5	0.9973	8	0	1	0	0	0	0	0	1	0.3948	Y	1	FALSE	TRUE
BRD-A22684332	procaterol	adrenergic receptor agonist, ADRB2	154	ADRB2	adrenoceptor beta 2	Known	0.6732	0.9182	0.9182	0.3613	0.5	0.5	0.9973	8	0	1	0	0	0	0	0	1	0.0614	Y	1	FALSE	TRUE
BRD-A36010170	amcinonide	corticosteroid agonist|cytochrome P450 inhibitor|glucocorticoid receptor agonist|immunosuppressant, NR3C1|ANXA1	1577	CYP3A5	cytochrome P450 family 3 subfamily A member 5	StructureLikely	0.6532	0.9205	0.9661	0.8465	0.5	0.5	0.9973	5	0	1	0	0	1	0	0	0	0.077	N	0	FALSE	TRUE
BRD-A42571354	cetirizine	histamine receptor antagonist, HRH1	185	AGTR1	angiotensin II receptor type 1	pQSAR	0.8428	0.8936	0.8936	0.4752	0.5	0.5	0.9973	2	1	1	0	0	0	0	0	0	0.0049	N	0	TRUE	FALSE
BRD-A58955223	sulforaphane	anticancer agent|aryl hydrocarbon receptor antagonist|nuclear factor erythroid derived, like (NRF2) activator, NFE2L2	7124	TNF	tumor necrosis factor	pQSAR	0.9168	0.872	0.872	0.1068	0.5	0.5	0.9973	2	1	1	0	0	0	0	0	0	0.0007	N	0	TRUE	FALSE
BRD-A68930007	ouabain	ATPase inhibitor|alpha subunit binder, ATP1A1|ATP1A2|ATP1A3|ATP1A4|ATP1B1|ATP1B2|ATP1B3|ATP1B4|FXYD2	3551	IKBKB	inhibitor of nuclear factor kappa B kinase subunit beta	pQSAR	0.9259	0.8676	0.8676	0.1652	0.58	0.5131	0.9973	2	1	1	0	0	0	0	0	0	0.0005	N	0	TRUE	FALSE
BRD-A74907996	equol	estrogen receptor agonist, ESR2|ESR1	2099	ESR1	estrogen receptor 1	Known	0.7045	0.9149	0.9149	0.5165	0.5	0.5	0.9973	8	0	1	0	0	0	0	1	1	0.0422	Y	1	FALSE	TRUE
BRD-A84327315	calcitriol	vitamin D receptor agonist|hypercalcaemic agent, VDR|CYP3A5	367	AR	androgen receptor	pQSAR	0.9062	0.8769	0.8769	0.2204	0.5	0.5	0.9973	2	1	1	0	0	0	0	0	0	0.001	N	0	TRUE	FALSE
BRD-K01192156	tyrphostin-AG-112	protein tyrosine kinase inhibitor, EGFR	5468	PPARG	peroxisome proliferator activated receptor gamma	pQSAR	0.8654	0.8885	0.8885	0.2204	0.5	0.5	0.9973	2	1	1	0	0	0	0	0	0	0.003	N	0	TRUE	FALSE
BRD-K10995081	perphenazine	dopamine receptor|dopamine receptor antagonist, DRD2|CALM1|DRD1|HRH1|HTR2A|HTR2C|HTR6|HTR7	152	ADRA2C	adrenoceptor alpha 2C	pIC50	0.4014	0.94	0.94	0.824	0.5	0.5	0.9973	7	0	1	0	0	1	0	1	0	0.5765	N	0	FALSE	TRUE
BRD-K10995081	perphenazine	dopamine receptor|dopamine receptor antagonist, DRD2|CALM1|DRD1|HRH1|HTR2A|HTR2C|HTR6|HTR7	801	CALM1	calmodulin 1	Known	0.7545	0.9082	0.9633	0.8298	0.5	0.5	0.9973	8	0	1	0	0	1	0	0	1	0.0217	Y	1	FALSE	TRUE
BRD-K15409150	penfluridol	dopamine receptor antagonist|T-type calcium channel blocker, CACNA1G|DRD1|DRD2	1577	CYP3A5	cytochrome P450 family 3 subfamily A member 5	pQSAR	0.8976	0.8797	0.8797	0.4752	0.5	0.5	0.9973	2	1	1	0	0	0	0	0	0	0.0013	N	0	TRUE	FALSE
BRD-K17743125	belinostat	HDAC inhibitor|cell cycle inhibitor, HDAC1|HDAC2|HDAC3|HDAC4|HDAC5|HDAC6|HDAC7|HDAC8|HDAC9	9734	HDAC9	histone deacetylase 9	Known	0.5565	0.9289	0.9289	0.5549	0.5	0.7576	0.9973	8	0	1	0	0	0	0	0	1	0.2001	Y	1	FALSE	TRUE
BRD-K22947005	dexbrompheniramine	histamine receptor antagonist, HRH1	1128	CHRM1	cholinergic receptor muscarinic 1	StructureSure	0.6898	0.9167	0.9756	0.9908	0.5	0.5	0.9973	6	0	1	0	0	1	1	0	0	0.0505	N	0	FALSE	TRUE
BRD-K54759182	dosulepin	adrenergic transmitter uptake inhibitor|norepinephrine reuptake inhibitor|serotonin reuptake inhibitor|serotonin uptake inhibitor|tricyclic antidepressant, SLC6A2|SLC6A4|CHRM1|CHRM2|CHRM3|CHRM4|CHRM5|CYP2C19|HRH1	185	AGTR1	angiotensin II receptor type 1	pQSAR	0.8613	0.8897	0.8897	0.1298	0.5	0.5	0.9973	2	1	1	0	0	0	0	0	0	0.0033	N	0	TRUE	FALSE
BRD-K57875380	asenapine	dopamine receptor antagonist|serotonin receptor antagonist, DRD2|HTR2A|DRD1|HRH1|HTR1A|HTR1B|ADRA1A|ADRA2A|ADRA2B|ADRA2C|ADRB1|ADRB2|DRD3|DRD4|HRH2|HTR1D|HTR1E|HTR2B|HTR2C|HTR5A|HTR6|HTR7	3269	HRH1	histamine receptor H1	Known	0.5877	0.926	0.926	0.6321	0.5	0.5	0.9973	8	0	1	0	0	0	0	0	1	0.1505	Y	1	FALSE	TRUE
BRD-K68867920	quetiapine	dopamine receptor antagonist|serotonin receptor antagonist|adrenergic receptor antagonist|histamine receptor antagonist, DRD2|HTR1A|HTR2A|DRD1|HRH1|HTR1D|HTR1E|ADRA1A|ADRA1B|ADRA1D|ADRA2A|ADRA2B|ADRA2C|CHRM1|CHRM2|CHRM3|CHRM4|CHRM5|DRD3|DRD4|DRD5|HTR1B|HTR1F|HTR2C|HTR3A|HTR6|HTR7|SLC6A2	1812	DRD1	dopamine receptor D1	Known	0.3998	0.9403	0.9403	0.5595	0.5	0.5	0.9973	8	0	1	0	0	0	0	0	1	0.5811	Y	1	FALSE	TRUE
BRD-K80115247	epiandrosterone	negative non-competitive modulator of GABA-RC, G6PD	1327	COX4I1	cytochrome c oxidase subunit 4I1	pQSAR	0.8613	0.8892	0.8892	0.5452	0.5	0.5	0.9973	2	1	1	0	0	0	0	0	0	0.0033	N	0	TRUE	FALSE
BRD-K80970344	pyrrolidine-dithiocarbamate	NFkB pathway inhibitor, HSD11B1|RELA	150	ADRA2A	adrenoceptor alpha 2A	pQSAR	0.8613	0.8891	0.8891	0.1264	0.5	0.5	0.9973	2	1	1	0	0	0	0	0	0	0.0033	N	0	TRUE	FALSE
BRD-K88378636	withaferin-a	acetylcholinesterase inhibitor|butyrylcholinesterase inhibitors|IKK inhibitor|NFkB pathway inhibitor|PKC inhibitor, ACHE|BCHE|IKBKB	3320	HSP90AA1	heat shock protein 90 alpha family class A member 1	pQSAR	0.8881	0.883	0.883	0.1773	0.5	0.6979	0.9973	2	1	1	0	0	0	0	0	0	0.0017	N	0	TRUE	FALSE
BRD-K97509413	coumestrol	AGE inhibitor|estrogen receptor agonist|estrogen receptor ligand, ESR1|ESR2	2100	ESR2	estrogen receptor 2	Known	0.5912	0.9262	0.9367	0.6321	0.5	0.6073	0.9973	8	0	1	0	0	0	0	0	1	0.1455	Y	1	FALSE	TRUE
BRD-A15034104	bergenin	anti-arthritic compound that modulates Th1/Th2 cytokine balance, PTPN1	9212	AURKB	aurora kinase B	pQSAR	0.886	0.8822	0.8822	0.1881	0.5	0.5	0.9972	2	1	1	0	0	0	0	0	0	0.0018	N	0	TRUE	FALSE
BRD-A30437061	camptothecin	topoisomerase inhibitor|beta amyloid synthesis inhibitor|hypoxia inducible factor inhibitor, TOP1|HIF1A	3065	HDAC1	histone deacetylase 1	pQSAR	0.8117	0.8987	0.8987	0.2096	0.5	0.6302	0.9972	2	1	1	0	0	0	0	0	0	0.0088	N	0	TRUE	FALSE
BRD-A49225603	alimemazine	histamine receptor ligand, HRH1	775	CACNA1C	calcium voltage-gated channel subunit alpha1 C	pQSAR	0.8003	0.9005	0.9005	0.3381	0.5	0.5	0.9972	2	1	1	0	0	0	0	0	0	0.0107	N	0	TRUE	FALSE
BRD-A84481105	thioridazine	acetylcholine receptor ligand|dopamine receptor|dopamine receptor antagonist|mucosa associated lymphoid tissue lymphoma translocation protein 1 (MALT1) inhibitor, DRD1|DRD2|HTR2A|ADRA1A|ADRA1B|CHRNA7|DRD5|HRH1|HTR1A|HTR2C|HTR6|HTR7|KCNH2|MALT1	1812	DRD1	dopamine receptor D1	Known	0.5038	0.9315	0.954	0.6782	0.5	0.5	0.9972	8	0	1	0	0	0	0	0	1	0.3073	Y	1	FALSE	TRUE
BRD-A91008255	bepridil	calcium channel blocker|L-type calcium channel blocker, ATP1A1|CACNA1A|CACNA1C|CACNA1H|CACNA2D2|CALM1|KCNQ1|KCNQ4|PDE1A|PDE1B|SCN5A|TNNC1	801	CALM1	calmodulin 1	Known	0.5026	0.9318	0.9318	0.5165	0.5	0.5	0.9972	8	0	1	0	0	0	0	0	1	0.3101	Y	1	FALSE	TRUE
BRD-A92177080	betamethasone	corticosteroid agonist|glucocorticoid receptor agonist, NR3C1	1577	CYP3A5	cytochrome P450 family 3 subfamily A member 5	StructureSure	0.5231	0.9303	0.9772	0.9908	0.5	0.5	0.9972	6	0	1	0	0	1	1	0	0	0.2647	N	0	FALSE	TRUE
BRD-K08356259	xylometazoline	adrenergic receptor agonist, ADRA2A|ADRA2B|ADRA2C|ADRA1A|ADRA1B|ADRA1D	1131	CHRM3	cholinergic receptor muscarinic 3	pQSAR	0.8438	0.8928	0.8928	0.1773	0.5	0.5	0.9972	2	1	1	0	0	0	0	0	0	0.0048	N	0	TRUE	FALSE
BRD-K09295900	BRD-K09295900		1131	CHRM3	cholinergic receptor muscarinic 3	pQSAR	0.9003	0.8761	0.8761	0.1419	0.5	0.5	0.9972	2	1	1	0	0	0	0	0	0	0.0012	N	0	TRUE	FALSE
BRD-K12994359	valdecoxib	cyclooxygenase inhibitor, PTGS2|CA12|CYP2C19	5743	PTGS2	prostaglandin-endoperoxide synthase 2	Known	0.8236	0.8967	0.8984	0.7524	0.5	0.5	0.9972	8	1	1	0	0	0	0	1	1	0.0071	Y	1	TRUE	TRUE
BRD-K16485616	mocetinostat	HDAC inhibitor|cell cycle inhibitor, HDAC1|HDAC2|HDAC3|HDAC11	1025	CDK9	cyclin dependent kinase 9	pQSAR	0.8748	0.8844	0.8844	0.2419	0.3838	0.5	0.9972	2	1	1	0	0	0	0	0	0	0.0024	N	0	TRUE	FALSE
BRD-K17415526	tyrphostin-AG-835	protein tyrosine kinase inhibitor, EGFR	5743	PTGS2	prostaglandin-endoperoxide synthase 2	pQSAR	0.8783	0.8843	0.8843	0.4282	0.5	0.5	0.9972	2	1	1	0	0	0	0	0	0	0.0022	N	0	TRUE	FALSE
BRD-K18674849	flunisolide	cytochrome P450 inhibitor|corticosteroid agonist|corticosteroid hormone receptor agonist|glucocorticoid receptor agonist|immunosuppressant, NR3C1	866	SERPINA6	serpin family A member 6	StructureLikely	0.664	0.9181	0.9666	0.8298	0.5	0.5	0.9972	5	0	1	0	0	1	0	0	0	0.0682	N	0	FALSE	TRUE
BRD-K25433859	maprotiline	norepinephrine reputake inhibitor|tricyclic antidepressant (TCA), SLC6A2|ADRA1A|ADRA1B|ADRA1D|ADRA2A|ADRA2B|ADRA2C|CHRM1|CHRM2|CHRM3|CHRM4|CHRM5|DRD2|HRH1|HTR2A|HTR2C|HTR7	1128	CHRM1	cholinergic receptor muscarinic 1	Known	0.4366	0.937	0.937	0.9908	0.5	0.5	0.9972	8	0	1	0	0	1	1	0	1	0.4793	Y	1	FALSE	TRUE
BRD-K26241953	piceatannol	syk inhibitor|cyclooxygenase inhibitor|nitric oxide synthase inhibitor|SIRT activator|tyrosinase inhibitor|tyrosine kinase inhibitor, ATP5A1|ATP5B|ATP5C1|IRF3|PTGS2|SIRT1|SYK|TYR	3551	IKBKB	inhibitor of nuclear factor kappa B kinase subunit beta	pQSAR	0.8098	0.8992	0.8992	0.2096	0.5	0.5	0.9972	2	1	1	0	0	0	0	0	0	0.0091	N	0	TRUE	FALSE
BRD-K29582115	ziprasidone	dopamine receptor antagonist|serotonin receptor antagonist|norepinephrine reuptake inhibitor|serotonin receptor agonist|serotonin reuptake inhibitor, DRD2|HTR2A|HTR1A|HTR1D|HRH1|HTR1B|HTR1E|HTR2C|HTR7|ADRA1A|ADRA1B|ADRA2A|ADRA2B|ADRA2C|CHRM1|CHRM2|CHRM3|CHRM4|CHRM5|DRD1|DRD3|DRD4|DRD5|HTR3A|HTR6|SLC6A4	1812	DRD1	dopamine receptor D1	Known	0.5092	0.9311	0.9311	0.5595	0.5	0.5	0.9972	8	0	1	0	0	0	0	1	1	0.2949	Y	1	FALSE	TRUE
BRD-K32977963	eugenol	androgen receptor (AR) inhibitor|free radical scavenger|monoamine oxidase inhibitor|quorum sensing signaling modulator, AR|MAOA	154	ADRB2	adrenoceptor beta 2	pQSAR	0.8927	0.8799	0.8799	0.468	0.5	0.5	0.9972	2	1	1	0	0	0	0	0	0	0.0015	N	0	TRUE	FALSE
BRD-K37289225	clozapine	serotonin receptor antagonist|dopamine receptor antagonist|adrenergic receptor antagonist, DRD2|DRD4|ADRA1A|ADRA1B|CHRM1|DRD1|DRD3|HRH1|HRH4|HTR1A|HTR1B|HTR1D|HTR1E|HTR2A|HTR2C|HTR6|HTR7|ADRA1D|ADRA2A|ADRA2B|ADRA2C|CALY|CHRM2|CHRM3|CHRM4|CHRM5|CYP2C19|DRD5|HTR1F|HTR2B|HTR3A|HTR5A	5226	PGD	phosphogluconate dehydrogenase	pQSAR	0.848	0.8913	0.8913	0.2204	0.5	0.5	0.9972	2	1	1	0	0	0	0	0	0	0.0044	N	0	TRUE	FALSE
BRD-K39120595	bithionol	autotaxin inhibitor, ESR1|ESR2|MCL1	1956	EGFR	epidermal growth factor receptor	pQSAR	0.8626	0.8877	0.8877	0.1692	0.5	0.5	0.9972	2	1	1	0	0	0	0	0	0	0.0032	N	0	TRUE	FALSE
BRD-K46937689	phenazone	cyclooxygenase inhibitor, PTGS1|PTGS2	3156	HMGCR	3-hydroxy-3-methylglutaryl-CoA reductase	pQSAR	0.946	0.8546	0.8546	0.1531	0.5	0.5	0.9972	2	1	1	0	0	0	0	0	0	0.0002	N	0	TRUE	FALSE
BRD-K47029922	tranylcypromine	cytochrome P450 inhibitor|histone lysine demethylase inhibitor|monoamine oxidase inhibitor, MAOA|MAOB|KDM1A|CYP2A6	4129	MAOB	monoamine oxidase B	Known	0.495	0.9327	0.9771	0.9908	0.5	0.5	0.9972	8	0	1	0	0	1	1	0	1	0.3278	Y	1	FALSE	TRUE
BRD-K49685476	TTNPB	RAR agonist|retinoid receptor agonist, RARB|RARA|RARG	5914	RARA	retinoic acid receptor alpha	Known	0.8783	0.8838	0.9747	0.9908	0.5	0.5	0.9972	8	1	1	0	0	1	1	0	1	0.0022	Y	1	TRUE	TRUE
BRD-K55127134	fluphenazine	dopamine receptor antagonist|acetylcholine receptor ligand|dopamine receptor|histamine receptor antagonist|serotonin receptor antagonist, DRD2|DRD1|CALM1|CHRNA7|DRD5|HRH1|HTR2A|HTR6|HTR7	801	CALM1	calmodulin 1	Known	0.649	0.9196	0.9701	0.9092	0.5	0.5	0.9972	8	0	1	0	0	1	0	0	1	0.0806	Y	1	FALSE	TRUE
BRD-K56957086	dacinostat	HDAC inhibitor, HDAC1|HDAC2|HDAC3|HDAC4|HDAC5|HDAC6|HDAC7|HDAC8|HDAC9	3091	HIF1A	hypoxia inducible factor 1 subunit alpha	pQSAR	0.813	0.8987	0.8987	0.2096	0.2112	0.5	0.9972	2	1	1	0	0	0	0	0	0	0.0086	N	0	TRUE	FALSE
BRD-K58685305	emodin	11-beta hydroxysteroid dehydrogenase inhibitor, CSNK2A1|CSNK2A2|CSNK2B|IL6|PTP4A3	3551	IKBKB	inhibitor of nuclear factor kappa B kinase subunit beta	pQSAR	0.8491	0.8913	0.8913	0.2608	0.5	0.493	0.9972	2	1	1	0	0	0	0	0	0	0.0043	N	0	TRUE	FALSE
BRD-K61993165	niacin	vitamin agonist, HCAR2|HCAR3|ACHE|DGAT2|HCAR1|NNMT|PTGDR|QPRT	4790	NFKB1	nuclear factor kappa B subunit 1	pQSAR	0.9168	0.8703	0.8703	0.5021	0.5	0.5	0.9972	2	1	1	0	0	0	0	0	0	0.0007	N	0	TRUE	FALSE
BRD-K67566344	KU-0063794	mTOR inhibitor, MTOR	2475	MTOR	mechanistic target of rapamycin kinase	Known	0.9378	0.8584	0.9431	0.8107	0.5	0.5	0.9972	8	1	1	0	0	1	0	1	1	0.0003	Y	1	TRUE	TRUE
BRD-K70358946	aripiprazole	serotonin receptor agonist|serotonin receptor antagonist|dopamine receptor agonist|dopamine receptor partial agonist|serotonin receptor partial agonist, DRD2|HTR1A|HTR2A|HRH1|HTR1B|HTR1D|HTR2C|ADRA1A|ADRA1B|ADRA2A|ADRA2B|ADRA2C|CHRM1|CHRM2|CHRM3|CHRM4|CHRM5|DRD1|DRD3|DRD4|DRD5|HTR1E|HTR3A|HTR6|HTR7	1812	DRD1	dopamine receptor D1	Known	0.5177	0.9311	0.9311	0.4967	0.5	0.5	0.9972	8	0	1	0	0	0	0	0	1	0.2762	Y	1	FALSE	TRUE
BRD-K72420232	WZ-4002	EGFR inhibitor, EGFR|ERBB2	6790	AURKA	aurora kinase A	pQSAR	0.848	0.8912	0.8912	0.3381	0.5	0.5	0.9972	2	1	1	0	0	0	0	0	0	0.0044	N	0	TRUE	FALSE
BRD-K79090631	CGP-60474	CDK inhibitor|PKC inhibitor, CDK1|CDK2	1017	CDK2	cyclin dependent kinase 2	Known	0.9259	0.8657	0.8657	0.468	0.7754	0.5	0.9972	8	1	1	0	0	0	0	1	1	0.0005	Y	1	TRUE	TRUE
BRD-K91263825	nortriptyline	PI3K inhibitor|potassium channel blocker|tricyclic antidepressant (TCA), KCNJ10|SLC6A2|SLC6A4|ADRA1A|ADRA1B|ADRA1D|ADRA2A|ADRA2B|ADRA2C|ADRB1|ADRB2|ADRB3|CHRM1|CHRM2|CHRM3|CHRM4|CHRM5|CYP2C19|DRD2|HRH1|HTR1A|HTR2A|HTR2C|HTR6|PGRMC1|PIK3CD|SIGMAR1	1128	CHRM1	cholinergic receptor muscarinic 1	Known	0.4369	0.9364	0.9572	0.7546	0.5	0.5	0.9972	8	0	1	0	0	0	0	1	1	0.4786	Y	1	FALSE	TRUE
BRD-K92310201	mometasone	glucocorticoid receptor agonist|immunosuppressant, NR3C1	866	SERPINA6	serpin family A member 6	StructureLikely	0.5898	0.9253	0.9584	0.824	0.5	0.5	0.9972	5	0	1	0	0	1	0	0	0	0.1475	N	0	FALSE	TRUE
BRD-K95435023	PHA-665752	c-Met inhibitor|hepatocyte growth factor receptor inhibitor, MET	6790	AURKA	aurora kinase A	pQSAR	0.9378	0.8597	0.8597	0.5452	0.5	0.5	0.9972	2	1	1	0	0	0	0	0	0	0.0003	N	0	TRUE	FALSE
BRD-K95773607	darifenacin	acetylcholine receptor antagonist, CHRM3|CHRM1|CHRM2|CHRM4|CHRM5	3269	HRH1	histamine receptor H1	pQSAR	0.8459	0.8916	0.8916	0.3613	0.5	0.5	0.9972	2	1	1	0	0	0	0	0	0	0.0046	N	0	TRUE	FALSE
BRD-A02180903	betamethasone	corticosteroid agonist|glucocorticoid receptor agonist, NR3C1	2099	ESR1	estrogen receptor 1	pQSAR	0.815	0.8967	0.9388	0.6079	0.5	0.5308	0.9971	2	1	1	0	0	0	0	0	0	0.0083	N	0	TRUE	FALSE
BRD-A22769835	homochlorcyclizine	antihistamine, HRH1	3269	HRH1	histamine receptor H1	Known	0.5023	0.9312	0.9738	0.9769	0.5	0.5	0.9971	8	0	1	0	0	1	1	0	1	0.3107	Y	1	FALSE	TRUE
BRD-A29426959	carbinoxamine	histamine receptor antagonist|L-type calcium channel blocker, HRH1	1131	CHRM3	cholinergic receptor muscarinic 3	pQSAR	0.8137	0.8966	0.9378	0.6913	0.5	0.5	0.9971	2	1	1	0	0	0	0	0	0	0.0085	N	0	TRUE	FALSE
BRD-A37704979	SB-203580	p38 MAPK inhibitor|calcium channel activator|interleukin inhibitor|stress activated protein kinase inhibitor, MAPK14|MAPK1|MAPK11|AKT1|ALOX5|CHEK1|CYP2D6|CYP3A4|GAK|GSK3B|LCK|MAPK10|MAPK12|MAPK8|MAPK9|PRKCA|RAF1|RIPK2|ROCK1|RPS6KB1|SGK1|SRC|TNF	1432	MAPK14	mitogen-activated protein kinase 14	Known	0.7375	0.9084	0.9657	0.8207	0.5	0.5	0.9971	8	0	1	0	0	1	0	1	1	0.0275	Y	1	FALSE	TRUE
BRD-A98431941	ephedrine	adrenergic receptor agonist, ACHE|ADRA1A|ADRB2|SLC18A2|SLC6A2	154	ADRB2	adrenoceptor beta 2	Known	0.4437	0.9351	0.9772	0.9908	0.5	0.5	0.9971	8	0	1	0	0	1	1	0	1	0.4599	Y	1	FALSE	TRUE
BRD-K03449891	foretinib	VEGFR inhibitor|angiogenesis inhibitor|AXL kinase inhibitor|FLT3 inhibitor|hepatocyte growth factor receptor inhibitor|KIT inhibitor|PDGFR tyrosine kinase receptor inhibitor|TIE tyrosine kinase inhibitor|tyrosine kinase inhibitor|VEGFR antagonist, KDR|MET|AXL|FLT1|FLT3|FLT4|KIT|MST1R|TEK	3718	JAK3	Janus kinase 3	pQSAR	0.946	0.8526	0.8526	0.3933	0.5	0.5	0.9971	2	1	1	0	0	0	0	0	0	0.0002	N	0	TRUE	FALSE
BRD-K13664374	dichloroacetic-acid	pyruvate dehydrogenase kinase inhibitor|pyruvate dehydrogenase stimulant, PDK1	2243	FGA	fibrinogen alpha chain	pQSAR	0.8014	0.8996	0.8996	0.5165	0.5	0.5	0.9971	2	1	1	0	0	0	0	0	0	0.0105	N	0	TRUE	FALSE
BRD-K18757346	U-46619	thromboxane receptor agonist, PTGDR|PTGDR2|PTGER1|PTGER2|PTGER3|PTGER4|PTGFR|PTGIR|TBXA2R	6915	TBXA2R	thromboxane A2 receptor	Known	0.3889	0.9389	0.963	0.7724	0.5	0.5	0.9971	8	0	1	0	0	0	0	0	1	0.6106	Y	1	FALSE	TRUE
BRD-K19309090	SR-95639A	acetylcholine receptor agonist, CHRM1	1131	CHRM3	cholinergic receptor muscarinic 3	pQSAR	0.9378	0.8577	0.8577	0.3497	0.5	0.5	0.9971	2	1	1	0	0	0	0	0	0	0.0003	N	0	TRUE	FALSE
BRD-K32501161	vanoxerine	dopamine reuptake inhibitor|dopamine transporter inhibitor|monoamine oxidase inhibitor, SLC6A3|MAOA|MAOB	476	ATP1A1	ATPase Na+/K+ transporting subunit alpha 1	pQSAR	0.9259	0.864	0.864	0.2419	0.5	0.5	0.9971	2	1	1	0	0	0	0	0	0	0.0005	N	0	TRUE	FALSE
BRD-K32681104	2-aminobenzenesulfonamide	carbonic anhydrase B inhibitor, CA12|CA14|CA2|CA6|CA9	3269	HRH1	histamine receptor H1	pQSAR	0.9378	0.8583	0.8583	0.2716	0.5	0.5	0.9971	2	1	1	0	0	0	0	0	0	0.0003	N	0	TRUE	FALSE
BRD-K33396764	alpha-linolenic-acid	omega-3 fatty acid, ELOVL4|FADS1|FADS2|FFAR1|FFAR4|PTGS2|SLC8A1|TRPV1	5916	RARG	retinoic acid receptor gamma	pQSAR	0.946	0.8528	0.8528	0.1379	0.5	0.5	0.9971	2	1	1	0	0	0	0	0	0	0.0002	N	0	TRUE	FALSE
BRD-K38305202	domperidone	dopamine receptor antagonist|breast cancer resistance protein inhibitor, DRD2|DRD3|ABCG2|CYP3A5	1577	CYP3A5	cytochrome P450 family 3 subfamily A member 5	Known	0.6196	0.921	0.921	0.3381	0.5	0.5	0.9971	8	0	1	0	0	0	0	0	1	0.1099	Y	1	FALSE	TRUE
BRD-K39188321	betamethasone	corticosteroid agonist|glucocorticoid receptor agonist, NR3C1	2908	NR3C1	nuclear receptor subfamily 3 group C member 1	Known	0.4193	0.9375	0.9771	0.9908	0.5	0.8919	0.9971	8	0	1	1	0	1	1	0	1	0.5273	Y	1	FALSE	TRUE
BRD-K41524689	paracetamol	cyclooxygenase inhibitor, PTGS1|PTGS2|CYP2E1	2562	GABRB3	gamma-aminobutyric acid type A receptor subunit beta3	pQSAR	0.8699	0.8854	0.8854	0.2931	0.5	0.5	0.9971	2	1	1	0	0	0	0	0	0	0.0027	N	0	TRUE	FALSE
BRD-K43389698	BMS-387032	CDK inhibitor|cell cycle inhibitor|MCL1 inhibitor, CDK2|CDK7|CDK9|MCL1	3091	HIF1A	hypoxia inducible factor 1 subunit alpha	pQSAR	0.8669	0.8849	0.8849	0.1112	0.5	0.5	0.9971	2	1	1	0	0	0	0	0	0	0.0029	N	0	TRUE	FALSE
BRD-K49657628	tyrphostin-AG-18	epidermal growth factor receptor (EGFR) inhibitor|tyrosine kinase inhibitor, EGFR	1956	EGFR	epidermal growth factor receptor	Known	0.6171	0.9218	0.9633	0.8107	0.5	0.5	0.9971	8	0	1	0	0	1	0	0	1	0.1128	Y	1	FALSE	TRUE
BRD-K58685305	emodin	11-beta hydroxysteroid dehydrogenase inhibitor, CSNK2A1|CSNK2A2|CSNK2B|IL6|PTP4A3	1457	CSNK2A1	casein kinase 2 alpha 1	Known	0.4598	0.9345	0.9345	0.2931	0.5	0.4827	0.9971	8	0	1	0	0	0	0	0	1	0.4168	Y	1	FALSE	TRUE
BRD-K59850506	gestrinone	progesterone receptor antagonist|Estradiol 17 beta dehydrogenase stimulant|estrone sulfotransferase stimulant, PGR|AR|ESR1	2099	ESR1	estrogen receptor 1	Known	0.694	0.9133	0.9378	0.8638	0.5	0.5	0.9971	8	0	1	0	0	1	0	0	1	0.048	Y	1	FALSE	TRUE
BRD-K62858456	lomerizine	calcium channel antagonist|calcium channel blocker|P glycoprotein inhibitor, ABCB1|CACNA1B|SCN5A	775	CACNA1C	calcium voltage-gated channel subunit alpha1 C	pQSAR	0.8654	0.8853	0.8853	0.4895	0.5	0.5	0.9971	2	1	1	0	0	0	0	0	0	0.003	N	0	TRUE	FALSE
BRD-K67783091	haloperidol	dopamine receptor antagonist, DRD2|DRD1|DRD3|HTR2A|CYP3A7|DRD4|DRD5|GRIN2B|HRH1|HTR1A|HTR1D|HTR2B|HTR7|KCNH1	1812	DRD1	dopamine receptor D1	Known	0.5615	0.9266	0.9305	0.6712	0.5	0.6372	0.9971	8	0	1	0	0	0	0	1	1	0.1915	Y	1	FALSE	TRUE
BRD-K74927006	cinnarizine	calcium ion channel antagonist|histamine receptor antagonist, HRH1|CACNA1C|CACNA1D|CACNA1F|CACNA1G|CACNA1H|CACNA1I|CACNA1S|CHRM1|CHRM2|CHRM3|CHRM4|CHRM5|DRD1|DRD2|DRD5	1131	CHRM3	cholinergic receptor muscarinic 3	Known	0.6391	0.9192	0.9192	0.9908	0.5	0.5	0.9971	8	0	1	0	0	1	1	0	1	0.0897	Y	1	FALSE	TRUE
BRD-K78126613	menadione	CDC inhibitor|mitochondrial DNA polymerase inhibitor|phosphatase inhibitor|pyruvate kinase isozyme inhibitor, AOX1|BGLAP|F10|F2|F7|F9|GGCX|NQO1|NQO2|PKM|PROC|PROS1|PROZ|VKORC1|VKORC1L1	79001	VKORC1	vitamin K epoxide reductase complex subunit 1	Known	0.642	0.9187	0.9187	0.4608	0.5	0.5536	0.9971	8	0	1	0	0	0	0	0	1	0.0869	Y	1	FALSE	TRUE
BRD-K80970344	pyrrolidine-dithiocarbamate	NFkB pathway inhibitor, HSD11B1|RELA	3551	IKBKB	inhibitor of nuclear factor kappa B kinase subunit beta	pQSAR	0.886	0.8808	0.8808	0.1071	0.5	0.5	0.9971	2	1	1	0	0	0	0	0	0	0.0018	N	0	TRUE	FALSE
BRD-K81091703	chlorprothixene	dopamine receptor|dopamine receptor antagonist, DRD2|CHRM1|CHRM2|CHRM3|CHRM4|CHRM5|DRD1|DRD3|HRH1|HTR2A|HTR2B|HTR2C	1131	CHRM3	cholinergic receptor muscarinic 3	Known	0.307	0.9452	0.9766	0.9908	0.5	0.5	0.9971	8	0	1	0	0	1	1	0	1	0.807	Y	1	FALSE	TRUE
BRD-K87991767	umbelliferone	carbonic anhydrase inhibitor|cyclooxygenase inhibitor, CA9|CA12|PTGS2	771	CA12	carbonic anhydrase 12	Known	0.5658	0.9259	0.9334	0.7635	0.5	0.5	0.9971	8	0	1	0	0	0	0	0	1	0.1843	Y	1	FALSE	TRUE
BRD-K91315211	betahistine	histamine receptor agonist|histamine receptor antagonist, HRH3|HRH1	3269	HRH1	histamine receptor H1	Known	0.838	0.8917	0.8917	0.5856	0.5	0.5	0.9971	8	1	1	0	0	0	0	0	1	0.0054	Y	1	TRUE	TRUE
BRD-K91370081	anisomycin	DNA synthesis inhibitor, NHP2L1|RPL10L|RPL11|RPL13A|RPL15|RPL19|RPL23|RPL23A|RPL26L1|RPL3|RPL37|RPL8|RSL24D1	3551	IKBKB	inhibitor of nuclear factor kappa B kinase subunit beta	pQSAR	0.8276	0.8946	0.8946	0.3149	0.7407	0.5	0.9971	2	1	1	0	0	0	0	0	0	0.0066	N	0	TRUE	FALSE
BRD-K97181089	amiloride	sodium channel blocker|diuretic|epithelial sodium channel blocker|sodium/hydrogen exchanger inhibitor, SCNN1A|ASIC1|ASIC2|SCNN1B|SCNN1G|AOC1|ASIC3|PKD2|PKD2L1|PLAU|SCNN1D|SLC9A1|TRPC7|TRPV2	3630	INS	insulin	pQSAR	0.8067	0.898	0.898	0.3265	0.5	0.5	0.9971	2	1	1	0	0	0	0	0	0	0.0096	N	0	TRUE	FALSE
BRD-K97564742	mepyramine	histamine receptor antagonist, HRH1	1131	CHRM3	cholinergic receptor muscarinic 3	pQSAR	0.8699	0.8849	0.8849	0.538	0.5	0.5	0.9971	2	1	1	0	0	0	0	0	0	0.0027	N	0	TRUE	FALSE
BRD-A07440155	labetalol	adrenergic receptor antagonist, ADRB1|ADRB2|ADRA1A|ADRA1D|ADRA1B	154	ADRB2	adrenoceptor beta 2	Known	0.6983	0.9127	0.913	0.6405	0.5	0.5	0.997	8	0	1	0	0	0	0	0	1	0.0456	Y	1	FALSE	TRUE
BRD-A15297126	fluocinonide	corticosteroid agonist|corticosteroid hormone receptor agonist, NR3C1|SERPINA6|SMO	301	ANXA1	annexin A1	StructureLikely	0.7108	0.9108	0.9658	0.814	0.5	0.5	0.997	5	0	1	0	0	1	0	0	0	0.039	N	0	FALSE	TRUE
BRD-A25143711	hydrocortisone	corticosteroid agonist|glucocorticoid receptor agonist|immunosuppressant|interleukin receptor antagonist, ANXA1|NOS2|NR3C1|NR3C2	301	ANXA1	annexin A1	Known	0.5642	0.9251	0.9607	0.814	0.5	0.5	0.997	8	0	1	0	0	1	0	0	1	0.1869	Y	1	FALSE	TRUE
BRD-A30437061	camptothecin	topoisomerase inhibitor|beta amyloid synthesis inhibitor|hypoxia inducible factor inhibitor, TOP1|HIF1A	1022	CDK7	cyclin dependent kinase 7	pQSAR	0.8626	0.8849	0.8849	0.1881	0.5	0.6266	0.997	2	1	1	0	0	0	0	0	0	0.0032	N	0	TRUE	FALSE
BRD-A35033682	eriodictyol	cytochrome P450 inhibitor|TRPM3 antagonist|xanthine oxidase inhibitor, CYP1B1|NFE2L2|XDH	367	AR	androgen receptor	StructureLikely	0.5083	0.9298	0.9298	0.8939	0.5	0.5	0.997	5	0	1	0	0	1	0	0	0	0.2969	N	0	FALSE	TRUE
BRD-A43974575	tranylcypromine	cytochrome P450 inhibitor|histone lysine demethylase inhibitor|monoamine oxidase inhibitor, MAOA|MAOB|KDM1A|CYP2A6	1128	CHRM1	cholinergic receptor muscarinic 1	pQSAR	0.8599	0.8857	0.8857	0.3933	0.5	0.5	0.997	2	1	1	0	0	0	0	0	0	0.0034	N	0	TRUE	FALSE
BRD-A53576514	orphenadrine	acetylcholine receptor antagonist, CYP2B6|GRIN1|GRIN2D|GRIN3A|GRIN3B|HRH1|SCN10A|SLC6A2	116443	GRIN3A	glutamate ionotropic receptor NMDA type subunit 3A	Known	0.4428	0.9349	0.9349	0.4824	0.5	0.5	0.997	8	0	1	0	0	0	0	0	1	0.4625	Y	1	FALSE	TRUE
BRD-A68723818	brompheniramine	histamine receptor antagonist, HRH1|CHRM1|CHRM2|CHRM3|CHRM4|CHRM5	1128	CHRM1	cholinergic receptor muscarinic 1	Known	0.7026	0.9118	0.9118	0.5452	0.5	0.5	0.997	8	0	1	0	0	0	0	0	1	0.0432	Y	1	FALSE	TRUE
BRD-K02265150	amoxapine	adrenergic transmitter uptake inhibitor|dopamine receptor|norepinephrine reputake inhibitor|serotonin receptor antagonist|serotonin reuptake inhibitor|serotonin uptake inhibitor|tricyclic antidepressant, SLC6A2|SLC6A4|HTR2A|HTR6|ADRA1A|ADRA1B|ADRA1D|ADRA2A|ADRA2B|ADRA2C|CHRM1|CHRM2|CHRM3|CHRM4|CHRM5|DRD1|DRD2|DRD3|DRD4|GABRA1|GABRA2|GABRA3|GABRA4|GABRA5|GABRA6|GABRB1|GABRB2|GABRB3|GABRD|GABRE|GAB…	1812	DRD1	dopamine receptor D1	Known	0.4633	0.9333	0.9584	0.9092	0.5	0.5	0.997	8	0	1	0	0	1	0	0	1	0.4074	Y	1	FALSE	TRUE
BRD-K06543683	bisindolylmaleimide-ix	PKC inhibitor|glycogen synthase kinase inhibitor|leucine rich repeat kinase inhibitor|SIRT inhibitor, SIRT1|AKT1|GSK3B|LCK|LRRK2|MAPK1|MAPK11|MAPK12|MAPK14|MAPK8|PRKCA|ROCK1|RPS6KB1|SIRT2	6850	SYK	spleen associated tyrosine kinase	pQSAR	0.8199	0.8944	0.8944	0.4752	0.5	0.5024	0.997	2	1	1	0	0	0	0	0	0	0.0076	N	0	TRUE	FALSE
BRD-K09436313	prostaglandin	prostanoid receptor antagonist, AKR1C3|PTGDR|PTGDR2|PTGER1|PTGER2|PTGER4|PTGFR	6915	TBXA2R	thromboxane A2 receptor	StructureLikely	0.6387	0.9188	0.9625	0.8699	0.5	0.5	0.997	5	0	1	0	0	1	0	0	0	0.0901	N	0	FALSE	TRUE
BRD-K12502280	TG-101348	JAK inhibitor|FLT3 inhibitor|RET tyrosine kinase inhibitor, JAK2|FLT3|BRD4|JAK1|JAK3|RET|TYK2	673	BRAF	B-Raf proto-oncogene, serine/threonine kinase	pIC50	0.8207	0.8944	0.8944	0.25	0.5	0.5	0.997	7	1	1	0	0	0	0	1	0	0.0075	N	0	TRUE	TRUE
BRD-K14965640	ibuprofen	cyclooxygenase inhibitor|NFkB pathway inhibitor, PTGS2|PTGS1|ASIC1|BCL2|CFTR|CYP2C8|FABP2|PLAT|PPARG|SLC5A8|THBD	154	ADRB2	adrenoceptor beta 2	pQSAR	0.884	0.8797	0.8797	0.3265	0.5	0.5	0.997	2	1	1	0	0	0	0	0	0	0.0019	N	0	TRUE	FALSE
BRD-K17497770	butein	angiotensin converting enzyme inhibitor|epidermal growth factor receptor (EGFR) inhibitor|interleukin synthesis inhibitor|NFkB pathway inhibitor|SIRT activator|Src tyrosine kinase inhibitor|steroid 5alpha-reductase inhibitor|tumor necrosis factor production inhibitor, ACE|CXCL8|IL6|SIRT1|SRD5A1|SRD5A2|TNF	9212	AURKB	aurora kinase B	pQSAR	0.8586	0.8857	0.8857	0.2823	0.5	0.4651	0.997	2	1	1	0	0	0	0	0	0	0.0035	N	0	TRUE	FALSE
BRD-K20313525	rosmarinic-acid	antioxidant, MCL1|TYR	7124	TNF	tumor necrosis factor	pQSAR	0.946	0.8502	0.9254	0.7177	0.5	0.5	0.997	2	1	1	0	0	0	0	0	0	0.0002	N	0	TRUE	FALSE
BRD-K26801045	pipamperone	dopamine receptor|dopamine receptor antagonist|serotonin receptor antagonist, DRD2|HTR2A|HRH1|HTR1A|HTR1B|HTR1D	150	ADRA2A	adrenoceptor alpha 2A	pQSAR	0.8951	0.8755	0.8755	0.2716	0.5	0.5	0.997	2	1	1	0	0	0	0	0	0	0.0014	N	0	TRUE	FALSE
BRD-K32247306	primidone	GABA receptor antagonist|unidentified pharmacological activity, GABRA1|CHRNA4|CHRNA7|GABRA2|GABRA3|GABRA4|GABRA5|GABRA6|GABRB1|GABRB2|GABRB3|GABRD|GABRE|GABRG1|GABRG2|GABRG3|GABRP|GABRQ|GRIA2|GRIK2	4128	MAOA	monoamine oxidase A	pQSAR	0.884	0.8788	0.8788	0.2312	0.5	0.5	0.997	2	1	1	0	0	0	0	0	0	0.0019	N	0	TRUE	FALSE
BRD-K35189033	levonorgestrel	estrogen receptor agonist|glucocorticoid receptor antagonist|progesterone receptor agonist|progesterone receptor antagonist, PGR|AR|CYP2E1|ESR1|SRD5A1	775	CACNA1C	calcium voltage-gated channel subunit alpha1 C	pQSAR	0.8317	0.8925	0.8925	0.1692	0.5	0.5	0.997	2	1	1	0	0	0	0	0	0	0.0061	N	0	TRUE	FALSE
BRD-K36862742	hydroflumethiazide	sodium/potassium/chloride transporter inhibitor, SLC12A1|ATP1A1|CA1|CA12|CA2|CA4|CA9|KCNMA1	760	CA2	carbonic anhydrase 2	Known	0.797	0.8989	0.9329	0.786	0.5	0.5	0.997	8	0	1	0	0	0	0	0	1	0.0113	Y	1	FALSE	TRUE
BRD-K39915878	loxapine	dopamine receptor antagonist|serotonin receptor antagonist|dopamine receptor ligand, DRD2|DRD3|DRD4|DRD1|HRH1|HTR2A|HTR2C|HTR6|ADRA1A|ADRA1B|ADRA2A|ADRA2B|ADRA2C|ADRB1|CHRM1|CHRM2|CHRM3|CHRM4|CHRM5|DRD5|HRH2|HRH4|HTR1A|HTR1B|HTR1D|HTR1E|HTR3A|HTR5A|HTR7|SLC6A2|SLC6A3|SLC6A4	3358	HTR2C	5-hydroxytryptamine receptor 2C	Known	0.2476	0.949	0.9611	0.9092	0.5	0.5	0.997	8	0	1	0	0	1	0	1	1	0.9033	Y	1	FALSE	TRUE
BRD-K50135270	GBR-12935	dopamine uptake inhibitor, AGTR1|SLC6A3	4128	MAOA	monoamine oxidase A	StructureLikely	0.8043	0.8978	0.961	0.9355	0.5	0.5	0.997	5	1	1	0	0	1	0	0	0	0.01	N	0	TRUE	TRUE
BRD-K57546357	prunetin	breast cancer resistance protein inhibitor, ABCG2|ALDH2	2099	ESR1	estrogen receptor 1	StructureLikely	0.6537	0.9168	0.9609	0.8769	0.5	0.5	0.997	5	0	1	0	0	1	0	0	0	0.0765	N	0	FALSE	TRUE
BRD-K60507178	podophyllotoxin	caspase activator|insulin growth factor receptor inhibitor|microtubule inhibitor|tubulin inhibitor, IGF1R|CASP3|TOP2A|TUBA4A|TUBB	3551	IKBKB	inhibitor of nuclear factor kappa B kinase subunit beta	pQSAR	0.9062	0.8715	0.8715	0.1264	0.5	0.5	0.997	2	1	1	0	0	0	0	0	0	0.001	N	0	TRUE	FALSE
BRD-K69116396	sertindole	dopamine receptor antagonist|serotonin receptor antagonist|adrenergic receptor antagonist, DRD2|HTR2A|HTR2C|ADRA1A|ADRA1B|ADRA1D|DRD3|DRD4|HRH1|HTR1A|HTR1B|HTR1D|HTR1E|HTR1F|HTR6|KCNH2	1812	DRD1	dopamine receptor D1	pQSAR	0.8171	0.8954	0.8954	0.5236	0.5	0.5	0.997	2	1	1	0	0	0	0	0	0	0.008	N	0	TRUE	FALSE
BRD-K77925998	quipazine	serotonin receptor agonist, HTR2A|HTR3A|HTR3B|HTR1A|HTR1D|HTR2B|HTR2C|HTR6|SLC6A4	3358	HTR2C	5-hydroxytryptamine receptor 2C	Known	0.6663	0.9157	0.9451	0.8332	0.5	0.5	0.997	8	0	1	0	0	1	0	1	1	0.0665	Y	1	FALSE	TRUE
BRD-K90699611	acitretin	retinoid receptor agonist|microbial collagenase inhibitor|protein synthesis inhibitor, RARA|RARB|RARG|RBP1|RXRA|RXRB|RXRG|STAT3	5914	RARA	retinoic acid receptor alpha	Known	0.9062	0.8721	0.8721	0.9908	0.5	0.5	0.997	8	1	1	0	0	1	1	0	1	0.001	Y	1	TRUE	TRUE
BRD-A06352418	terfenadine	histamine receptor antagonist, HRH1|KCNH2|CHRM1|CHRM2|CHRM3|CHRM4|CHRM5|KCNH1	476	ATP1A1	ATPase Na+/K+ transporting subunit alpha 1	pQSAR	0.8043	0.8969	0.8969	0.146	0.5	0.5	0.9969	2	1	1	0	0	0	0	0	0	0.01	N	0	TRUE	FALSE
BRD-A35588707	teniposide	topoisomerase inhibitor|DNA inhibitor|DNA repair enzyme inhibitor|mitotic inhibitor, TOP2A|CYP3A5	3326	HSP90AB1	heat shock protein 90 alpha family class B member 1	pQSAR	0.8626	0.8842	0.8842	0.146	0.5	0.5837	0.9969	2	1	1	0	0	0	0	0	0	0.0032	N	0	TRUE	FALSE
BRD-A68202111	BRD-A68202111	ATPase inhibitor, ATP1A1|ATP1A2|ATP1A3|ATP1A4|ATP1B1|ATP1B2|ATP1B3|ATP1B4|FXYD2	486	FXYD2	FXYD domain containing ion transport regulator 2	Known	0.347	0.9411	0.9663	0.8499	0.5	0.5	0.9969	8	0	1	0	0	1	0	0	1	0.7186	Y	1	FALSE	TRUE
BRD-A68650781	epitiostanol	androgen receptor agonist|RNA directed RNA polymerase stimulant, AR	367	AR	androgen receptor	Known	0.4804	0.9312	0.9396	0.5992	0.5	0.5	0.9969	8	0	1	0	0	0	0	0	1	0.3636	Y	1	FALSE	TRUE
BRD-A68723818	brompheniramine	histamine receptor antagonist, HRH1|CHRM1|CHRM2|CHRM3|CHRM4|CHRM5	3269	HRH1	histamine receptor H1	Known	0.6236	0.9189	0.9756	0.9908	0.5	0.5	0.9969	8	0	1	0	0	1	1	1	1	0.1055	Y	1	FALSE	TRUE
BRD-A79479878	testosterone	androgen receptor (AR) agonist|androgen receptor agonist|testosterone receptor agonist, AR|CYP19A1|CYP2C19|CYP2C8|CYP3A5	367	AR	androgen receptor	Known	0.4732	0.9317	0.9771	0.9908	0.5	0.5	0.9969	8	0	1	0	0	1	1	0	1	0.3818	Y	1	FALSE	TRUE
BRD-K02130563	panobinostat	HDAC inhibitor|apoptosis stimulant|cell cycle inhibitor, HDAC1|HDAC2|HDAC3|HDAC4|HDAC6|HDAC7|HDAC8|HDAC9	7150	TOP1	DNA topoisomerase I	pQSAR	0.8428	0.8884	0.8884	0.1531	0.5	0.478	0.9969	2	1	1	0	0	0	0	0	0	0.0049	N	0	TRUE	FALSE
BRD-K04949373	parthenolide	NFkB pathway inhibitor|adiponectin receptor agonist, ADIPOR2|IKBKB|RELA	3551	IKBKB	inhibitor of nuclear factor kappa B kinase subunit beta	Known	0.9062	0.8694	0.9761	0.9908	0.5	0.5	0.9969	8	1	1	0	0	1	1	0	1	0.001	Y	1	TRUE	TRUE
BRD-K08356259	xylometazoline	adrenergic receptor agonist, ADRA2A|ADRA2B|ADRA2C|ADRA1A|ADRA1B|ADRA1D	1128	CHRM1	cholinergic receptor muscarinic 1	pQSAR	0.8185	0.8935	0.8935	0.1773	0.5	0.5	0.9969	2	1	1	0	0	0	0	0	0	0.0078	N	0	TRUE	FALSE
BRD-K10467831	tibolone	estrogen receptor agonist|androgen receptor agonist|progesterone receptor agonist|selective estrogen receptor modulator (SERM)|steryl sulfatase inhibitor, AR|ESR1|PGR|STS	367	AR	androgen receptor	Known	0.4616	0.9322	0.9322	0.581	0.5	0.5	0.9969	8	0	1	0	0	0	0	0	1	0.4119	Y	1	FALSE	TRUE
BRD-K10995081	perphenazine	dopamine receptor|dopamine receptor antagonist, DRD2|CALM1|DRD1|HRH1|HTR2A|HTR2C|HTR6|HTR7	1128	CHRM1	cholinergic receptor muscarinic 1	StructureLikely	0.355	0.94	0.9498	0.824	0.5	0.5	0.9969	5	0	1	0	0	1	0	0	0	0.699	N	0	FALSE	TRUE
BRD-K11590034	morin	antioxidant, ADORA2A|CYP1A2|ESR2|FASN|MCL1|SLC22A12	3551	IKBKB	inhibitor of nuclear factor kappa B kinase subunit beta	pQSAR	0.83	0.8915	0.8915	0.2931	0.5	0.5	0.9969	2	1	1	0	0	0	0	0	0	0.0063	N	0	TRUE	FALSE
BRD-K12343256	trametinib	MEK inhibitor, MAP2K1|MAP2K2|CYP2C8|CYP3A4	5604	MAP2K1	mitogen-activated protein kinase kinase 1	Known	0.8613	0.8844	0.8844	0.2716	0.4834	0.8546	0.9969	8	1	1	1	0	0	0	1	1	0.0033	Y	1	TRUE	TRUE
BRD-K13544237	r(-)-propylnorapomorphine	dopamine receptor agonist|antiamyloidogenic agent, DRD2|DRD1|DRD3	1812	DRD1	dopamine receptor D1	Known	0.7152	0.9091	0.9771	0.9908	0.5	0.5	0.9969	8	0	1	0	0	1	1	0	1	0.0369	Y	1	FALSE	TRUE
BRD-K13664374	dichloroacetic-acid	pyruvate dehydrogenase kinase inhibitor|pyruvate dehydrogenase stimulant, PDK1	3269	HRH1	histamine receptor H1	pQSAR	0.8881	0.8761	0.8761	0.1202	0.5	0.5	0.9969	2	1	1	0	0	0	0	0	0	0.0017	N	0	TRUE	FALSE
BRD-K13688115	medrysone	corticosteroid hormone receptor agonist|glucocorticoid receptor agonist, NR3C1	1997	ELF1	E74 like ETS transcription factor 1	pQSAR	0.8765	0.8802	0.8802	0.3039	0.5	0.5	0.9969	2	1	1	0	0	0	0	0	0	0.0023	N	0	TRUE	FALSE
BRD-K14550461	doxercalciferol	vitamin D receptor agonist, VDR	1131	CHRM3	cholinergic receptor muscarinic 3	pQSAR	0.8669	0.8825	0.8825	0.1419	0.5	0.5	0.9969	2	1	1	0	0	0	0	0	0	0.0029	N	0	TRUE	FALSE
BRD-K37814297	acepromazine	dopamine receptor antagonist, ADRA1A|ADRA1B|DRD1|DRD2|HTR1A|HTR2A	1812	DRD1	dopamine receptor D1	Known	0.4977	0.9298	0.9567	0.8073	0.5	0.5	0.9969	8	0	1	0	0	1	0	1	1	0.3215	Y	1	FALSE	TRUE
BRD-K37846922	3,3'-diindolylmethane	androgen receptor antagonist|aryl hydrocarbon receptor agonist|beta glucuronidase inhibitor|CHK inhibitor|cytochrome P450 activator|indoleamine 2,3-dioxygenase inhibitor, AHR|AR|CYP1A2|GUSB|IDO1	3269	HRH1	histamine receptor H1	pQSAR	0.8783	0.8792	0.8792	0.4165	0.5	0.5217	0.9969	2	1	1	0	0	0	0	0	0	0.0022	N	0	TRUE	FALSE
BRD-K40175214	torin-1	mTOR inhibitor|PI3K inhibitor, MTOR|PIK3CA	5294	PIK3CG	phosphatidylinositol-4,5-bisphosphate 3-kinase catalytic subunit gamma	pQSAR	0.9378	0.8539	0.8539	0.1881	0.5	0.5	0.9969	2	1	1	0	0	0	0	0	0	0.0003	N	0	TRUE	FALSE
BRD-K41494493	bisphenol-a	synthetic compound with hormone-like properties, AR|ESR2|ESRRG|PPARG	154	ADRB2	adrenoceptor beta 2	pQSAR	0.8491	0.8868	0.8868	0.3381	0.5	0.5	0.9969	2	1	1	0	0	0	0	0	0	0.0043	N	0	TRUE	FALSE
BRD-K43797669	genistein	tyrosine kinase inhibitor|angiogenesis inhibitor|CFTR channel activator|EGFR inhibitor|estrogen receptor agonist|histidine kinase inhibitor|immunosuppressant|isoflavone agonist|protein tyrosine kinase inhibitor|reducing agent|topoisomerase inhibitor, CFTR|ESR2|EGFR|ESR1|ESRRA|ESRRB|ESRRG|NCOA1|NCOA2|PPARG|PTK2B|TOP2A|TRPC5	1460	CSNK2B	casein kinase 2 beta	pQSAR	0.8343	0.8899	0.8899	0.4824	0.5	0.5	0.9969	2	1	1	0	0	0	0	0	0	0.0058	N	0	TRUE	FALSE
BRD-K50422030	clomethiazole	GABA receptor agonist|GABA receptor antagonist|GABA receptor modulator|p38 MAPK inhibitor, GABRA1	10587	TXNRD2	thioredoxin reductase 2	pQSAR	0.8117	0.8953	0.8953	0.1248	0.5	0.5	0.9969	2	1	1	0	0	0	0	0	0	0.0088	N	0	TRUE	FALSE
BRD-K61993165	niacin	vitamin agonist, HCAR2|HCAR3|ACHE|DGAT2|HCAR1|NNMT|PTGDR|QPRT	5743	PTGS2	prostaglandin-endoperoxide synthase 2	pQSAR	0.884	0.8786	0.8786	0.581	0.5	0.5	0.9969	2	1	1	0	0	0	0	0	0	0.0019	N	0	TRUE	FALSE
BRD-K70330367	amantadine	glutamate receptor antagonist|acetylcholine channel inhibitor|dopamine receptor agonist, DRD2|GRIN1|GRIN2A|GRIN2B|GRIN2C|GRIN2D|GRIN3A	2932	GSK3B	glycogen synthase kinase 3 beta	pQSAR	0.9095	0.8685	0.8685	0.1096	0.5	0.5	0.9969	2	1	1	0	0	0	0	0	0	0.0009	N	0	TRUE	FALSE
BRD-K77641333	naphazoline	adrenergic receptor agonist|peptide agonist, ADRA1A|ADRA2A	150	ADRA2A	adrenoceptor alpha 2A	Known	0.5503	0.9258	0.9259	0.7376	0.5	0.5	0.9969	8	0	1	0	0	0	0	1	1	0.2111	Y	1	FALSE	TRUE
BRD-K82143716	flucytosine	pyrimidine analog, inhibits fungal DNA synthesis, DNMT1	142	PARP1	poly(ADP-ribose) polymerase 1	pQSAR	0.813	0.8949	0.8949	0.1419	0.5	0.5	0.9969	2	1	1	0	0	0	0	0	0	0.0086	N	0	TRUE	FALSE
BRD-K83257731	chloropyramine	focal adhesion kinase inhibitor|histamine receptor antagonist, HRH1	150	ADRA2A	adrenoceptor alpha 2A	pQSAR	0.8408	0.8887	0.8887	0.5452	0.5	0.5	0.9969	2	1	1	0	0	0	0	0	0	0.0051	N	0	TRUE	FALSE
BRD-K84443303	clobetasol	glucocorticoid receptor agonist, NR3C1|PLA2G1B	866	SERPINA6	serpin family A member 6	StructureLikely	0.532	0.9265	0.9674	0.8803	0.5	0.5	0.9969	5	0	1	0	0	1	0	0	0	0.2463	N	0	FALSE	TRUE
BRD-K88378636	withaferin-a	acetylcholinesterase inhibitor|butyrylcholinesterase inhibitors|IKK inhibitor|NFkB pathway inhibitor|PKC inhibitor, ACHE|BCHE|IKBKB	3326	HSP90AB1	heat shock protein 90 alpha family class B member 1	pQSAR	0.8669	0.883	0.883	0.1773	0.5	0.6979	0.9969	2	1	1	0	0	0	0	0	0	0.0029	N	0	TRUE	FALSE
BRD-K88741031	methyl-2,5-dihydroxycinnamate	EGFR inhibitor|tyrosine kinase inhibitor, EGFR	11156	PTP4A3	protein tyrosine phosphatase 4A3	pQSAR	0.8783	0.8794	0.8794	0.4514	0.5	0.5	0.9969	2	1	1	0	0	0	0	0	0	0.0022	N	0	TRUE	FALSE
BRD-K91966436	daunorubicin	RNA synthesis inhibitor|topoisomerase inhibitor|DNA synthesis inhibitor|radical formation stimulant, TOP2A|TOP2B	7155	TOP2B	DNA topoisomerase II beta	Known	0.8654	0.8828	0.9754	0.9908	0.5	0.5	0.9969	8	1	1	0	0	1	1	0	1	0.003	Y	1	TRUE	TRUE
BRD-K95773607	darifenacin	acetylcholine receptor antagonist, CHRM3|CHRM1|CHRM2|CHRM4|CHRM5	1131	CHRM3	cholinergic receptor muscarinic 3	Known	0.638	0.9175	0.9175	0.538	0.5	0.5	0.9969	8	0	1	0	0	0	0	1	1	0.0907	Y	1	FALSE	TRUE
BRD-K99545815	PF-562271	focal adhesion kinase inhibitor|angiogenesis inhibitor|apoptosis stimulant, PTK2|PTK2B	3643	INSR	insulin receptor	pIC50	0.8599	0.8845	0.8845	0.2419	0.5	0.5	0.9969	7	1	1	0	0	0	0	1	0	0.0034	N	0	TRUE	TRUE
BRD-A06352418	terfenadine	histamine receptor antagonist, HRH1|KCNH2|CHRM1|CHRM2|CHRM3|CHRM4|CHRM5|KCNH1	1577	CYP3A5	cytochrome P450 family 3 subfamily A member 5	pQSAR	0.8654	0.882	0.882	0.3497	0.5	0.5	0.9968	2	1	1	0	0	0	0	0	0	0.003	N	0	TRUE	FALSE
BRD-A18929998	cytarabine	antimetabolite|DNA polymerase inhibitor|DNA synthesis inhibitor|ribonucleotide reductase inhibitor, POLB|POLA1	6241	RRM2	ribonucleotide reductase regulatory subunit M2	NCI60	0.4397	0.9336	0.9336	0.7806	0.5	0.8011	0.9968	3	0	1	1	0	0	0	0	0	0.471	N	0	FALSE	TRUE
BRD-A20119038	mecamylamine	acetylcholine receptor antagonist, CHRNA2|CHRNA1|CHRNA3|CHRNA4|CHRNA6|CHRNA7	2099	ESR1	estrogen receptor 1	pQSAR	0.9168	0.8635	0.8635	0.1128	0.5	0.5	0.9968	2	1	1	0	0	0	0	0	0	0.0007	N	0	TRUE	FALSE
BRD-A29426959	carbinoxamine	histamine receptor antagonist|L-type calcium channel blocker, HRH1	3269	HRH1	histamine receptor H1	Known	0.5021	0.9287	0.9606	0.7963	0.5	0.5	0.9968	8	0	1	0	0	0	0	1	1	0.3112	Y	1	FALSE	TRUE
BRD-A35108200	dexamethasone	glucocorticoid receptor agonist|corticosteroid agonist|immunosuppressant, ANXA1|CYP3A4|CYP3A5|NOS2|NR0B1|NR3C1|NR3C2	2099	ESR1	estrogen receptor 1	pQSAR	0.8067	0.8943	0.9375	0.6079	0.5	0.5308	0.9968	2	1	1	0	0	0	0	0	0	0.0096	N	0	TRUE	FALSE
BRD-A35588707	teniposide	topoisomerase inhibitor|DNA inhibitor|DNA repair enzyme inhibitor|mitotic inhibitor, TOP2A|CYP3A5	3091	HIF1A	hypoxia inducible factor 1 subunit alpha	pQSAR	0.8137	0.893	0.893	0.1881	0.5	0.7529	0.9968	2	1	1	0	0	0	0	0	0	0.0085	N	0	TRUE	FALSE
BRD-A45664787	iloprost	platelet aggregation inhibitor|prostanoid receptor agonist|prostacyclin analog, PTGIR|PTGER1|PTGER2|PDE4A|PDE4B|PDE4C|PDE4D|PLAT|PTGDR|PTGER3|PTGER4|PTGFR|TBXA2R	3156	HMGCR	3-hydroxy-3-methylglutaryl-CoA reductase	pQSAR	0.8343	0.8891	0.8891	0.1692	0.5	0.5	0.9968	2	1	1	0	0	0	0	0	0	0.0058	N	0	TRUE	FALSE
BRD-A48180038	trihexyphenidyl	anticholinergic, CHRM1|CHRM2|CHRM3|CHRM4|CHRM5	1131	CHRM3	cholinergic receptor muscarinic 3	Known	0.5367	0.9258	0.9747	0.9908	0.5	0.5	0.9968	8	0	1	0	0	1	1	0	1	0.2369	Y	1	FALSE	TRUE
BRD-A53131506	epitestosterone	inactive testosterone analog, AKR1C1|AKR1C2|AR	367	AR	androgen receptor	Known	0.4479	0.9324	0.9771	0.9908	0.5	0.5	0.9968	8	0	1	0	0	1	1	0	1	0.4485	Y	1	FALSE	TRUE
BRD-A72988804	tiaprofenic-acid	cyclooxygenase inhibitor, PTGS2|PTGS1	150	ADRA2A	adrenoceptor alpha 2A	pQSAR	0.9062	0.868	0.868	0.1733	0.5	0.5	0.9968	2	1	1	0	0	0	0	0	0	0.001	N	0	TRUE	FALSE
BRD-A73368467	fexofenadine	histamine receptor antagonist, HRH1	1131	CHRM3	cholinergic receptor muscarinic 3	StructureLikely	0.884	0.8763	0.9081	0.8534	0.5	0.5	0.9968	5	1	1	0	0	1	0	0	0	0.0019	N	0	TRUE	TRUE
BRD-A76941896	doxorubicin	topoisomerase inhibitor|DNA intercalating drug, TOP2A	7153	TOP2A	DNA topoisomerase II alpha	Known	0.7929	0.897	0.9763	0.9908	0.5	0.8532	0.9968	8	0	1	1	0	1	1	0	1	0.0121	Y	1	FALSE	TRUE
BRD-A99833829	bethanechol	acetylcholine receptor agonist, CHRM2|CHRM1|CHRM3|CHRM4	3553	IL1B	interleukin 1 beta	pQSAR	0.83	0.8904	0.8904	0.1338	0.5	0.5	0.9968	2	1	1	0	0	0	0	0	0	0.0063	N	0	TRUE	FALSE
BRD-K05104363	PD-184352	MEK inhibitor|MAP kinase inhibitor, MAP2K1|MAP2K2|MAP3K1|MAP3K2	5605	MAP2K2	mitogen-activated protein kinase kinase 2	Known	0.8881	0.8759	0.96	0.8207	0.5	0.5	0.9968	8	1	1	0	0	1	0	0	1	0.0017	Y	1	TRUE	TRUE
BRD-K06750613	GSK-1059615	PI3K inhibitor|mTOR inhibitor, PIK3CA|PIK3CG	2475	MTOR	mechanistic target of rapamycin kinase	pIC50	0.946	0.8464	0.8464	0.1989	0.5	0.5	0.9968	7	1	1	0	0	0	0	1	0	0.0002	N	0	TRUE	TRUE
BRD-K06980535	promazine	dopamine receptor|dopamine receptor antagonist, CHRM5|DRD2|ADRA1A|ADRA1B|ADRA1D|CHRM1|CHRM2|CHRM3|CHRM4|DRD1|DRD3|DRD4|HRH1|HTR2A|HTR2C	1577	CYP3A5	cytochrome P450 family 3 subfamily A member 5	pQSAR	0.8654	0.8815	0.8815	0.4282	0.5	0.5	0.9968	2	1	1	0	0	0	0	0	0	0.003	N	0	TRUE	FALSE
BRD-K07881437	danusertib	Aurora kinase inhibitor|growth factor receptor inhibitor|Abl kinase inhibitor|Bcr-Abl kinase inhibitor|FGFR inhibitor|mitotic inhibitor|protein kinase inhibitor|RET tyrosine kinase inhibitor, AURKA|AURKB|AURKC|FGFR1|NTRK1|RET|BCR|SLK	3717	JAK2	Janus kinase 2	pIC50	0.8715	0.8808	0.8808	0.3613	0.5	0.5	0.9968	7	1	1	0	0	0	0	1	0	0.0026	N	0	TRUE	TRUE
BRD-K17743125	belinostat	HDAC inhibitor|cell cycle inhibitor, HDAC1|HDAC2|HDAC3|HDAC4|HDAC5|HDAC6|HDAC7|HDAC8|HDAC9	3066	HDAC2	histone deacetylase 2	Known	0.4969	0.9289	0.9289	0.5549	0.5	0.7576	0.9968	8	0	1	0	0	0	0	0	1	0.3234	Y	1	FALSE	TRUE
BRD-K20141153	atomoxetine	norepinephrine transporter inhibitor|adrenergic transmitter uptake inhibitor, SLC6A2|SLC6A3|SLC6A4|GRIN1|GRIN2A|GRIN2B|GRIN2C|GRIN2D|GRIN3A|GRIN3B	10857	PGRMC1	progesterone receptor membrane component 1	pQSAR	0.8055	0.8944	0.8944	0.3381	0.5	0.5	0.9968	2	1	1	0	0	0	0	0	0	0.0098	N	0	TRUE	FALSE
BRD-K28761384	zuclopenthixol	dopamine receptor antagonist, DRD2|DRD1|ADRA1A|ADRA2A|DRD5|HRH1|HTR2A	150	ADRA2A	adrenoceptor alpha 2A	Known	0.3989	0.9361	0.9391	0.9908	0.5	0.5	0.9968	8	0	1	0	0	1	1	0	1	0.5835	Y	1	FALSE	TRUE
BRD-K30240666	clemastine	histamine receptor antagonist, HRH1	2030	SLC29A1	solute carrier family 29 member 1 (Augustine blood group)	pQSAR	0.884	0.8763	0.8763	0.1531	0.5	0.5	0.9968	2	1	1	0	0	0	0	0	0	0.0019	N	0	TRUE	FALSE
BRD-K35520305	dacarbazine	DNA alkylating drug, PGD|POLA2	1131	CHRM3	cholinergic receptor muscarinic 3	pQSAR	0.8783	0.8787	0.8787	0.1202	0.5	0.5342	0.9968	2	1	1	0	0	0	0	0	0	0.0022	N	0	TRUE	FALSE
BRD-K43149758	myricetin	androgen receptor ligand|cytochrome P450 inhibitor, PIK3CG|AR|CYP3A4	2100	ESR2	estrogen receptor 2	StructureLikely	0.5579	0.9241	0.9673	0.814	0.5	0.5	0.9968	5	0	1	0	0	1	0	0	0	0.1977	N	0	FALSE	TRUE
BRD-K43797669	genistein	tyrosine kinase inhibitor|angiogenesis inhibitor|CFTR channel activator|EGFR inhibitor|estrogen receptor agonist|histidine kinase inhibitor|immunosuppressant|isoflavone agonist|protein tyrosine kinase inhibitor|reducing agent|topoisomerase inhibitor, CFTR|ESR2|EGFR|ESR1|ESRRA|ESRRB|ESRRG|NCOA1|NCOA2|PPARG|PTK2B|TOP2A|TRPC5	2100	ESR2	estrogen receptor 2	Known	0.5284	0.9262	0.9528	0.7347	0.5	0.5	0.9968	8	0	1	0	0	0	0	1	1	0.2536	Y	1	FALSE	TRUE
BRD-K46211610	tolazoline	adrenergic receptor antagonist, ADRA2A|ADRA2B|ADRA2C|ADRA1A|HRH1|HRH2	152	ADRA2C	adrenoceptor alpha 2C	Known	0.5855	0.9216	0.9216	0.6079	0.5	0.5	0.9968	8	0	1	0	0	0	0	0	1	0.1536	Y	1	FALSE	TRUE
BRD-K46503544	etoposide	topoisomerase inhibitor|cell cycle inhibitor|DNA inhibitor|DNA intercalating drug|DNA repair enzyme inhibitor, TOP2A|CYP2E1|CYP3A5|TOP2B	7155	TOP2B	DNA topoisomerase II beta	Known	0.8613	0.8828	0.977	0.9908	0.5	0.8919	0.9968	8	1	1	1	0	1	1	0	1	0.0033	Y	1	TRUE	TRUE
BRD-K49448285	bisindolylmaleimide	CDK inhibitor|PKC inhibitor|leucine rich repeat kinase inhibitor, CCND1|CDK4|LRRK2|PDPK1|PIM1|PRKCA|PRKCB|PRKCI|PRKCZ	1019	CDK4	cyclin dependent kinase 4	Known	0.5435	0.9254	0.9277	0.7576	0.5	0.5	0.9968	8	0	1	0	0	0	0	0	1	0.2237	Y	1	FALSE	TRUE
BRD-K49668410	clarithromycin	50S ribosomal subunit inhibitor, CYP2C19|CYP3A4|CYP3A5|CYP3A7	2908	NR3C1	nuclear receptor subfamily 3 group C member 1	pQSAR	0.8061	0.8945	0.8945	0.1611	0.5	0.5	0.9968	2	1	1	0	0	0	0	0	0	0.0097	N	0	TRUE	FALSE
BRD-K53737926	amitriptyline	norepinephrine inhibitor|serotonin receptor inhibitor|sigma receptor inhibitor, CHRM1|CHRM2|CHRM3|CHRM4|CHRM5|HRH1|HTR6|SLC6A2|SLC6A4|ADRA1A|ADRA1B|ADRA1D|ADRA2A|ADRB1|ADRB2|ADRB3|HRH2|HRH4|HTR1A|HTR1B|HTR1D|HTR2A|HTR2C|HTR7|KCNA1|KCND2|KCND3|KCNQ2|KCNQ3|NTRK1|NTRK2|OPRD1|OPRK1|OPRM1|SIGMAR1	154	ADRB2	adrenoceptor beta 2	Known	0.3172	0.9421	0.9572	0.7546	0.5	0.5	0.9968	8	0	1	0	0	0	0	0	1	0.7862	Y	1	FALSE	TRUE
BRD-K55930204	phenytoin	sodium channel blocker, ABCB1|CYP2B6|CYP2C19|CYP3A4|SCN1A|SCN2A|SCN5A	4128	MAOA	monoamine oxidase A	pQSAR	0.8765	0.8793	0.8793	0.3381	0.5	0.5	0.9968	2	1	1	0	0	0	0	0	0	0.0023	N	0	TRUE	FALSE
BRD-K80315159	DPPE	histamine receptor antagonist, ABCB1|HRH1	1131	CHRM3	cholinergic receptor muscarinic 3	pQSAR	0.8137	0.8934	0.8934	0.468	0.5	0.5	0.9968	2	1	1	0	0	0	0	0	0	0.0085	N	0	TRUE	FALSE
BRD-K82357231	desloratadine	histamine receptor antagonist, HRH1	3269	HRH1	histamine receptor H1	Known	0.5923	0.9209	0.9209	0.7935	0.5	0.5	0.9968	8	0	1	0	0	0	0	1	1	0.144	Y	1	FALSE	TRUE
BRD-K85266041	DNQX	glutamate receptor antagonist, GRIA1|GRIA2|GRIK1|GRIN1|GRIN2A|GRIN2B	1577	CYP3A5	cytochrome P450 family 3 subfamily A member 5	pQSAR	0.8715	0.88	0.88	0.2312	0.5	0.5	0.9968	2	1	1	0	0	0	0	0	0	0.0026	N	0	TRUE	FALSE
BRD-K96778649	tyrphostin-47	EGFR inhibitor|epidermal growth factor receptor (EGFR) inhibitor, EGFR	1956	EGFR	epidermal growth factor receptor	Known	0.8214	0.8923	0.9654	0.8207	0.5	0.8208	0.9968	8	1	1	1	0	1	0	0	1	0.0074	Y	1	TRUE	TRUE
BRD-K97118047	4,5,6,7-tetrabromobenzotriazole	casein kinase inhibitor, CSNK2A1|AKT1|CHEK1|CSNK2A2|CSNK2B|GSK3B|LCK|MAP2K1|MAPK1|MAPK11|MAPK12|MAPK14|MAPK8|PRKCA|ROCK1|RPS6KB1|SGK1	5564	PRKAB1	protein kinase AMP-activated non-catalytic subunit beta 1	pQSAR	0.9095	0.8672	0.8672	0.105	0.5	0.5	0.9968	2	1	1	0	0	0	0	0	0	0.0009	N	0	TRUE	FALSE
BRD-K98521173	desoxycortone	mineralocorticoid receptor agonist, NR3C1|NR3C2	367	AR	androgen receptor	StructureLikely	0.4346	0.9334	0.9642	0.8332	0.5	0.5	0.9968	5	0	1	0	0	1	0	0	0	0.4848	N	0	FALSE	TRUE
BRD-A19500257	geldanamycin	HSP inhibitor, HSP90AA1|HSP90AB1	7846	TUBA1A	tubulin alpha 1a	pQSAR	0.8783	0.8764	0.8764	0.1531	0.5	0.5154	0.9967	2	1	1	0	0	0	0	0	0	0.0022	N	0	TRUE	FALSE
BRD-A34806832	proscillaridin	ATPase inhibitor, ATP1A1	3551	IKBKB	inhibitor of nuclear factor kappa B kinase subunit beta	pQSAR	0.8343	0.8886	0.8886	0.2419	0.5645	0.5353	0.9967	2	1	1	0	0	0	0	0	0	0.0058	N	0	TRUE	FALSE
BRD-A39290993	cyproterone	androgen receptor antagonist|DNA directed DNA polymerase stimunlant|Estradiol 17 beta dehydrogenase stimulant|estrone sulfotransferase stimulant|progesterone receptor agonist|testosterone receptor antagonist, AR|ADORA1|ESR1	367	AR	androgen receptor	Known	0.561	0.923	0.9772	0.9908	0.5	0.5	0.9967	8	0	1	0	0	1	1	0	1	0.1923	Y	1	FALSE	TRUE
BRD-A68202111	BRD-A68202111	ATPase inhibitor, ATP1A1|ATP1A2|ATP1A3|ATP1A4|ATP1B1|ATP1B2|ATP1B3|ATP1B4|FXYD2	478	ATP1A3	ATPase Na+/K+ transporting subunit alpha 3	Known	0.3236	0.9411	0.9663	0.8499	0.5	0.5	0.9967	8	0	1	0	0	1	0	0	1	0.7724	Y	1	FALSE	TRUE
BRD-A75726477	clenbuterol	adrenergic receptor agonist, ADRB2|ADRB1|ADRB3|NGF|TNF	154	ADRB2	adrenoceptor beta 2	Known	0.5221	0.9259	0.9412	0.7524	0.5	0.5	0.9967	8	0	1	0	0	0	0	1	1	0.2667	Y	1	FALSE	TRUE
BRD-A84481105	thioridazine	acetylcholine receptor ligand|dopamine receptor|dopamine receptor antagonist|mucosa associated lymphoid tissue lymphoma translocation protein 1 (MALT1) inhibitor, DRD1|DRD2|HTR2A|ADRA1A|ADRA1B|CHRNA7|DRD5|HRH1|HTR1A|HTR2C|HTR6|HTR7|KCNH2|MALT1	3358	HTR2C	5-hydroxytryptamine receptor 2C	Known	0.4387	0.9329	0.9457	0.6489	0.5	0.5	0.9967	8	0	1	0	0	0	0	0	1	0.4737	Y	1	FALSE	TRUE
BRD-A93477898	PETCM	caspase activator, CASP3	152	ADRA2C	adrenoceptor alpha 2C	pQSAR	0.8514	0.8838	0.8838	0.15	0.5	0.5	0.9967	2	1	1	0	0	0	0	0	0	0.0041	N	0	TRUE	FALSE
BRD-K02265150	amoxapine	adrenergic transmitter uptake inhibitor|dopamine receptor|norepinephrine reputake inhibitor|serotonin receptor antagonist|serotonin reuptake inhibitor|serotonin uptake inhibitor|tricyclic antidepressant, SLC6A2|SLC6A4|HTR2A|HTR6|ADRA1A|ADRA1B|ADRA1D|ADRA2A|ADRA2B|ADRA2C|CHRM1|CHRM2|CHRM3|CHRM4|CHRM5|DRD1|DRD2|DRD3|DRD4|GABRA1|GABRA2|GABRA3|GABRA4|GABRA5|GABRA6|GABRB1|GABRB2|GABRB3|GABRD|GABRE|GAB…	2562	GABRB3	gamma-aminobutyric acid type A receptor subunit beta3	Known	0.4946	0.9279	0.9279	0.4608	0.5	0.5	0.9967	8	0	1	0	0	0	0	0	1	0.3287	Y	1	FALSE	TRUE
BRD-K11663430	pyroxamide	HDAC inhibitor|cell cycle inhibitor, HDAC1	10013	HDAC6	histone deacetylase 6	StructureLikely	0.9259	0.8583	0.9323	0.8332	0.5	0.7563	0.9967	5	1	1	0	0	1	0	0	0	0.0005	N	0	TRUE	TRUE
BRD-K12513978	fenbufen	cyclooxygenase inhibitor, PTGS1|PTGS2	5743	PTGS2	prostaglandin-endoperoxide synthase 2	Known	0.8032	0.894	0.894	0.6247	0.5	0.5	0.9967	8	1	1	0	0	0	0	0	1	0.0102	Y	1	TRUE	TRUE
BRD-K13664374	dichloroacetic-acid	pyruvate dehydrogenase kinase inhibitor|pyruvate dehydrogenase stimulant, PDK1	1432	MAPK14	mitogen-activated protein kinase 14	pQSAR	0.8317	0.8887	0.8887	0.1096	0.5	0.5	0.9967	2	1	1	0	0	0	0	0	0	0.0061	N	0	TRUE	FALSE
BRD-K17497770	butein	angiotensin converting enzyme inhibitor|epidermal growth factor receptor (EGFR) inhibitor|interleukin synthesis inhibitor|NFkB pathway inhibitor|SIRT activator|Src tyrosine kinase inhibitor|steroid 5alpha-reductase inhibitor|tumor necrosis factor production inhibitor, ACE|CXCL8|IL6|SIRT1|SRD5A1|SRD5A2|TNF	3551	IKBKB	inhibitor of nuclear factor kappa B kinase subunit beta	pQSAR	0.813	0.8926	0.8926	0.3497	0.5	0.7686	0.9967	2	1	1	0	0	0	0	0	0	0.0086	N	0	TRUE	FALSE
BRD-K26674531	GR-235	FXR antagonist|cholesterol inhibitor|estrogen receptor agonist|IKK inhibitor|progesterone receptor agonist|PXR agonist, ESR1|IKBKB|NR1H4|NR1I2|PGR	2099	ESR1	estrogen receptor 1	Known	0.3852	0.9364	0.9771	0.9908	0.5	0.5	0.9967	8	0	1	0	0	1	1	0	1	0.6208	Y	1	FALSE	TRUE
BRD-K30207000	dexamethasone	glucocorticoid receptor agonist|corticosteroid agonist|immunosuppressant, ANXA1|CYP3A4|CYP3A5|NOS2|NR0B1|NR3C1|NR3C2	1577	CYP3A5	cytochrome P450 family 3 subfamily A member 5	Known	0.4653	0.9303	0.977	0.9908	0.5	0.5	0.9967	8	0	1	0	0	1	1	0	1	0.4024	Y	1	FALSE	TRUE
BRD-K43149758	myricetin	androgen receptor ligand|cytochrome P450 inhibitor, PIK3CG|AR|CYP3A4	1545	CYP1B1	cytochrome P450 family 1 subfamily B member 1	StructureLikely	0.4792	0.9298	0.9635	0.8908	0.5	0.5	0.9967	5	0	1	0	0	1	0	0	0	0.3666	N	0	FALSE	TRUE
BRD-K43457670	acetazolamide	carbonic anhydrase inhibitor, CA14|CA1|CA2|CA4|CA7|AQP1|CA12|CA13|CA3|CA6	5743	PTGS2	prostaglandin-endoperoxide synthase 2	pQSAR	0.882	0.8761	0.8761	0.1692	0.5	0.5	0.9967	2	1	1	0	0	0	0	0	0	0.002	N	0	TRUE	FALSE
BRD-K47983010	BX-795	IKK inhibitor|PDK1 inhibitor|phosphoinositide dependent kinase inhibitor|serine/threonine kinase inhibitor|TBK1 inhibitor, PDPK1|CDK2|CHEK1|GSK3B|IKBKE|KDR|PDK1|TBK1	5604	MAP2K1	mitogen-activated protein kinase kinase 1	pQSAR	0.8055	0.8938	0.8938	0.1652	0.5	0.5	0.9967	2	1	1	0	0	0	0	0	0	0.0098	N	0	TRUE	FALSE
BRD-K53790871	triamcinolone	antiinflammatory agent|corticosteroid agonist|corticosteroid binding globulin binder|corticosteroid hormone receptor agonist|cytochrome P450 inhibitor|glucocorticoid receptor agonist|immunosuppressant|immunosuppressive agent, NR3C1|CYP3A5|CYP3A7|SERPINA6	1577	CYP3A5	cytochrome P450 family 3 subfamily A member 5	Known	0.5801	0.9214	0.9612	0.9908	0.5	0.5	0.9967	8	0	1	0	0	1	1	0	1	0.1616	Y	1	FALSE	TRUE
BRD-K59720958	finasteride	5 alpha reductase inhibitor|androgen receptor antagonist|steroid 5alpha-reductase inhibitor, SRD5A2|SRD5A1|AKR1D1|AR	866	SERPINA6	serpin family A member 6	pQSAR	0.8469	0.8848	0.8848	0.1989	0.5	0.5	0.9967	2	1	1	0	0	0	0	0	0	0.0045	N	0	TRUE	FALSE
BRD-K64044582	linoleamide	ACAT inhibitor, SOAT1|SOAT2	1131	CHRM3	cholinergic receptor muscarinic 3	pQSAR	0.8561	0.8833	0.8833	0.1379	0.5	0.5	0.9967	2	1	1	0	0	0	0	0	0	0.0037	N	0	TRUE	FALSE
BRD-K68867920	quetiapine	dopamine receptor antagonist|serotonin receptor antagonist|adrenergic receptor antagonist|histamine receptor antagonist, DRD2|HTR1A|HTR2A|DRD1|HRH1|HTR1D|HTR1E|ADRA1A|ADRA1B|ADRA1D|ADRA2A|ADRA2B|ADRA2C|CHRM1|CHRM2|CHRM3|CHRM4|CHRM5|DRD3|DRD4|DRD5|HTR1B|HTR1F|HTR2C|HTR3A|HTR6|HTR7|SLC6A2	152	ADRA2C	adrenoceptor alpha 2C	Known	0.3687	0.9376	0.9376	0.4967	0.5	0.5	0.9967	8	0	1	0	0	0	0	1	1	0.6643	Y	1	FALSE	TRUE
BRD-K70358946	aripiprazole	serotonin receptor agonist|serotonin receptor antagonist|dopamine receptor agonist|dopamine receptor partial agonist|serotonin receptor partial agonist, DRD2|HTR1A|HTR2A|HRH1|HTR1B|HTR1D|HTR2C|ADRA1A|ADRA1B|ADRA2A|ADRA2B|ADRA2C|CHRM1|CHRM2|CHRM3|CHRM4|CHRM5|DRD1|DRD3|DRD4|DRD5|HTR1E|HTR3A|HTR6|HTR7	152	ADRA2C	adrenoceptor alpha 2C	Known	0.4565	0.9311	0.9311	0.4967	0.5	0.5	0.9967	8	0	1	0	0	0	0	1	1	0.4254	Y	1	FALSE	TRUE
BRD-K70358946	aripiprazole	serotonin receptor agonist|serotonin receptor antagonist|dopamine receptor agonist|dopamine receptor partial agonist|serotonin receptor partial agonist, DRD2|HTR1A|HTR2A|HRH1|HTR1B|HTR1D|HTR2C|ADRA1A|ADRA1B|ADRA2A|ADRA2B|ADRA2C|CHRM1|CHRM2|CHRM3|CHRM4|CHRM5|DRD1|DRD3|DRD4|DRD5|HTR1E|HTR3A|HTR6|HTR7	3358	HTR2C	5-hydroxytryptamine receptor 2C	Known	0.46	0.9311	0.9311	0.5236	0.5	0.5	0.9967	8	0	1	0	0	0	0	0	1	0.4163	Y	1	FALSE	TRUE
BRD-K72420232	WZ-4002	EGFR inhibitor, EGFR|ERBB2	1956	EGFR	epidermal growth factor receptor	Known	0.7707	0.8991	0.8991	0.9383	0.5	0.5	0.9967	8	0	1	0	0	1	0	1	1	0.0171	Y	1	FALSE	TRUE
BRD-K80267133	aminosalicylic-acid	cyclooxygenase inhibitor, PTGS2|ALOX5|CHUK|PLA2G2E|PTGS1	5743	PTGS2	prostaglandin-endoperoxide synthase 2	Known	0.5699	0.9216	0.9681	0.8838	0.5	0.5	0.9967	8	0	1	0	0	1	0	0	1	0.1775	Y	1	FALSE	TRUE
BRD-K81418486	vorinostat	HDAC inhibitor|cell cycle inhibitor, HDAC1|HDAC2|HDAC3|HDAC6|HDAC8|HDAC10|HDAC11|HDAC5|HDAC9	9759	HDAC4	histone deacetylase 4	PSP	0.4862	0.9289	0.9289	0.6489	0.8192	0.7087	0.9967	4	0	1	0	1	0	0	0	0	0.3491	N	0	FALSE	TRUE
BRD-K90699611	acitretin	retinoid receptor agonist|microbial collagenase inhibitor|protein synthesis inhibitor, RARA|RARB|RARG|RBP1|RXRA|RXRB|RXRG|STAT3	5916	RARG	retinoic acid receptor gamma	Known	0.8927	0.8721	0.8721	0.9908	0.5	0.5	0.9967	8	1	1	0	0	1	1	0	1	0.0015	Y	1	TRUE	TRUE
BRD-A28746609	paclitaxel	tubulin inhibitor|microtubule stabilizing agent|microtubule stimulant|P glycoprotein inhibitor|taxane, TUBB|NR1I2|ABCB1|BCL2|CYP2C8|MAP2|MAP4|MAPT|TLR4|TUBB1	51727	CMPK1	cytidine/uridine monophosphate kinase 1	pQSAR	0.8361	0.886	0.886	0.1062	0.5	0.5	0.9966	2	1	1	0	0	0	0	0	0	0.0056	N	0	TRUE	FALSE
BRD-A31800922	procyclidine	anticholinergic, CHRM1|CHRM2|CHRM3|CHRM4	1128	CHRM1	cholinergic receptor muscarinic 1	Known	0.5529	0.9229	0.9747	0.9908	0.5	0.5	0.9966	8	0	1	0	0	1	1	1	1	0.2064	Y	1	FALSE	TRUE
BRD-A33168282	sotalol	adrenergic receptor antagonist|polarization inhibitor|potassium channel antagonist, ADRB1|ADRB2|KCNH2	154	ADRB2	adrenoceptor beta 2	Known	0.7462	0.9018	0.9172	0.6878	0.5	0.5	0.9966	8	0	1	0	0	0	0	0	1	0.0244	Y	1	FALSE	TRUE
BRD-A36151937	genistein	tyrosine kinase inhibitor|angiogenesis inhibitor|CFTR channel activator|EGFR inhibitor|estrogen receptor agonist|histidine kinase inhibitor|immunosuppressant|isoflavone agonist|protein tyrosine kinase inhibitor|reducing agent|topoisomerase inhibitor, CFTR|ESR2|EGFR|ESR1|ESRRA|ESRRB|ESRRG|NCOA1|NCOA2|PPARG|PTK2B|TOP2A|TRPC5	1956	EGFR	epidermal growth factor receptor	Known	0.7419	0.9031	0.9229	0.7347	0.5	0.5	0.9966	8	0	1	0	0	0	0	0	1	0.0259	Y	1	FALSE	TRUE
BRD-A49225603	alimemazine	histamine receptor ligand, HRH1	1812	DRD1	dopamine receptor D1	pIC50	0.3162	0.9412	0.9604	0.8734	0.5	0.5	0.9966	7	0	1	0	0	1	0	1	0	0.7882	N	0	FALSE	TRUE
BRD-A59808129	guggulsterone	estrogen receptor agonist|FXR antagonist|progesterone receptor agonist|cholesterol inhibitor|IKK inhibitor|PXR agonist, NR1H4|PGR|AR|ESR1|IKBKB|NR1I2|NR3C1|NR3C2	2908	NR3C1	nuclear receptor subfamily 3 group C member 1	Known	0.3881	0.9354	0.9529	0.9908	0.5	0.5	0.9966	8	0	1	0	0	1	1	0	1	0.6129	Y	1	FALSE	TRUE
BRD-A84327315	calcitriol	vitamin D receptor agonist|hypercalcaemic agent, VDR|CYP3A5	1131	CHRM3	cholinergic receptor muscarinic 3	pQSAR	0.946	0.8433	0.8433	0.1298	0.5	0.5	0.9966	2	1	1	0	0	0	0	0	0	0.0002	N	0	TRUE	FALSE
BRD-K00337317	NU-7441	DNA dependent protein kinase|DNA dependent protein kinase inhibitor|P glycoprotein inhibitor, PRKDC|ABCB1	5290	PIK3CA	phosphatidylinositol-4,5-bisphosphate 3-kinase catalytic subunit alpha	pIC50	0.9378	0.8493	0.9311	0.8465	0.5	0.5	0.9966	7	1	1	0	0	1	0	1	0	0.0003	N	0	TRUE	TRUE
BRD-K01663662	diphenidol	acetylcholine receptor ligand, CHRM1|CHRM3|CHRM4|CHRM2	1131	CHRM3	cholinergic receptor muscarinic 3	Known	0.5421	0.9234	0.9568	0.7376	0.5	0.5	0.9966	8	0	1	0	0	0	0	0	1	0.2264	Y	1	FALSE	TRUE
BRD-K07762753	aminopurvalanol-a	CDK inhibitor|tyrosine kinase inhibitor, CDK1|CDK2|CDK5|CDK6	9212	AURKB	aurora kinase B	pQSAR	0.9259	0.8562	0.8562	0.1773	0.5	0.5	0.9966	2	1	1	0	0	0	0	0	0	0.0005	N	0	TRUE	FALSE
BRD-K14036801	roxithromycin	50S ribosomal subunit inhibitor, ABCB1|MLNR	7155	TOP2B	DNA topoisomerase II beta	pQSAR	0.9378	0.85	0.85	0.2312	0.5	0.5	0.9966	2	1	1	0	0	0	0	0	0	0.0003	N	0	TRUE	FALSE
BRD-K16485616	mocetinostat	HDAC inhibitor|cell cycle inhibitor, HDAC1|HDAC2|HDAC3|HDAC11	1017	CDK2	cyclin dependent kinase 2	pQSAR	0.848	0.8844	0.8844	0.2716	0.6445	0.5	0.9966	2	1	1	0	0	0	0	0	0	0.0044	N	0	TRUE	FALSE
BRD-K29530284	amlexanox	histamine release inhibitor|mediator release inhibitor, FGF1|IL3|S100A12|S100A13	5743	PTGS2	prostaglandin-endoperoxide synthase 2	pQSAR	0.9259	0.8575	0.8575	0.4514	0.6622	0.5	0.9966	2	1	1	0	0	0	0	0	0	0.0005	N	0	TRUE	FALSE
BRD-K38436528	imipramine	norepinephrine reputake inhibitor|serotonin reuptake inhibitor|Sodium Channel Blockers, SLC6A2|SLC6A4|CHRM2|ADRA1A|ADRA1B|ADRA1D|CHRM1|CHRM3|CHRM4|CHRM5|CYP2C19|DRD1|DRD2|DRD5|HRH1|HTR1A|HTR2A|HTR2C|HTR6|HTR7|KCND2|KCND3|KCNH1|KCNH2|SLC6A3	1812	DRD1	dopamine receptor D1	Known	0.3247	0.9406	0.9662	0.7833	0.5	0.5	0.9966	8	0	1	0	0	0	0	0	1	0.7701	Y	1	FALSE	TRUE
BRD-K45401373	betulinic-acid	apoptosis stimulant|caspase activator|diacylglycerol O acyltransferase inhibitor|HIV integrase inhibitor|NFkB pathway activator|NFKB pathway inhibitor|SARS coronavirus 3C-like protease inhibitor|topoisomerase inhibitor, CASP3|CASP8|GPBAR1|TOP1	1066	CES1	carboxylesterase 1	pQSAR	0.8927	0.871	0.871	0.2931	0.5	0.5	0.9966	2	1	1	0	0	0	0	0	0	0.0015	N	0	TRUE	FALSE
BRD-K46937689	phenazone	cyclooxygenase inhibitor, PTGS1|PTGS2	5743	PTGS2	prostaglandin-endoperoxide synthase 2	Known	0.5821	0.9202	0.9406	0.6447	0.5	0.5	0.9966	8	0	1	0	0	0	0	0	1	0.1587	Y	1	FALSE	TRUE
BRD-K48935217	epothilone	inhibition of microtubulefunction|microtubule stabilizing agent|microtubule stimulant|tubulin inhibitor, TUBA1A|TUBA1B|TUBA1C|TUBA3C|TUBA4A|TUBA8|TUBB|TUBB1|TUBB3|TUBB4A|TUBB4B	7846	TUBA1A	tubulin alpha 1a	Known	0.5109	0.926	0.926	0.1217	0.5	0.5579	0.9966	8	0	1	0	0	0	0	0	1	0.2912	Y	1	FALSE	TRUE
BRD-K55127134	fluphenazine	dopamine receptor antagonist|acetylcholine receptor ligand|dopamine receptor|histamine receptor antagonist|serotonin receptor antagonist, DRD2|DRD1|CALM1|CHRNA7|DRD5|HRH1|HTR2A|HTR6|HTR7	1812	DRD1	dopamine receptor D1	Known	0.5542	0.9222	0.9694	0.9092	0.5	0.5	0.9966	8	0	1	0	0	1	0	0	1	0.2041	Y	1	FALSE	TRUE
BRD-K55591206	epigallocatechin	AP inhibitor|aromatase inhibitor|bacterial efflux pump inhibitor|beta amyloid aggregation inhibitor|beta amyloid protein neurotoxicity inhibitor|beta secretase inhibitor|DNA gyrase inhibitor|dual specificity tyrosine-(Y)-phosphorylation regulated kinase inhibitor|enoyl-(acyl-carrier protein) reductase Fabl inhibitor|fatty acid synthase inhibitor|HCV inhibitor|indoleamine 2,3-dioxygenase inhibitor…	2194	FASN	fatty acid synthase	Known	0.6742	0.9108	0.9769	0.9908	0.5	0.5	0.9966	8	0	1	0	0	1	1	0	1	0.0607	Y	1	FALSE	TRUE
BRD-K56064827	EI-273	PKC inhibitor, PRKCA|PRKCG	5578	PRKCA	protein kinase C alpha	Known	0.5079	0.9268	0.9268	0.4824	0.5	0.5	0.9966	8	0	1	0	0	0	0	0	1	0.2978	Y	1	FALSE	TRUE
BRD-K56957086	dacinostat	HDAC inhibitor, HDAC1|HDAC2|HDAC3|HDAC4|HDAC5|HDAC6|HDAC7|HDAC8|HDAC9	10383	TUBB4B	tubulin beta 4B class IVb	pQSAR	0.8207	0.8894	0.8894	0.117	0.5	0.5	0.9966	2	1	1	0	0	0	0	0	0	0.0075	N	0	TRUE	FALSE
BRD-K63675182	triflupromazine	acetylcholine receptor ligand|dopamine receptor, HTR2B|CHRM1|CHRM2|CHRNA7|DRD1|DRD2	3358	HTR2C	5-hydroxytryptamine receptor 2C	StructureLikely	0.2952	0.9428	0.9622	0.9176	0.5	0.5	0.9966	5	0	1	0	0	1	0	0	0	0.8294	N	0	FALSE	TRUE
BRD-K73319509	PF-04217903	c-Met inhibitor|hepatocyte growth factor receptor inhibitor, MET	4233	MET	MET proto-oncogene, receptor tyrosine kinase	Known	0.5935	0.9187	0.9187	0.3846	0.5	0.5	0.9966	8	0	1	0	0	0	0	1	1	0.1424	Y	1	FALSE	TRUE
BRD-K78712176	carbidopa	aromatic L-amino acid decarboxylase inhibitor|dopa decarboxylase (aromatic L-amino acid decarboxylase) inhibitor, DDC	1644	DDC	dopa decarboxylase	Known	0.7061	0.9071	0.9765	0.9908	0.5	0.5	0.9966	8	0	1	0	0	1	1	0	1	0.0414	Y	1	FALSE	TRUE
BRD-K79090631	CGP-60474	CDK inhibitor|PKC inhibitor, CDK1|CDK2	5292	PIM1	Pim-1 proto-oncogene, serine/threonine kinase	pQSAR	0.9062	0.8657	0.8657	0.1531	0.5694	0.5	0.9966	2	1	1	0	0	0	0	0	0	0.001	N	0	TRUE	FALSE
BRD-K80315159	DPPE	histamine receptor antagonist, ABCB1|HRH1	154	ADRB2	adrenoceptor beta 2	pQSAR	0.8881	0.8727	0.9151	0.5504	0.5	0.5	0.9966	2	1	1	0	0	0	0	0	0	0.0017	N	0	TRUE	FALSE
BRD-K88741031	methyl-2,5-dihydroxycinnamate	EGFR inhibitor|tyrosine kinase inhibitor, EGFR	1457	CSNK2A1	casein kinase 2 alpha 1	pQSAR	0.8229	0.8895	0.8895	0.4514	0.5	0.5	0.9966	2	1	1	0	0	0	0	0	0	0.0072	N	0	TRUE	FALSE
BRD-K99107520	felbamate	carbonic anhydrase inhibitor|GABA receptor modulator|glutamate receptor blocker, GRIN2A|GRIN2B|GRIN3A	142	PARP1	poly(ADP-ribose) polymerase 1	pQSAR	0.8144	0.8907	0.8907	0.2096	0.5	0.5	0.9966	2	1	1	0	0	0	0	0	0	0.0084	N	0	TRUE	FALSE
BRD-K99964838	bosutinib	src inhibitor|Abl kinase inhibitor|Bcr-Abl kinase inhibitor|apoptosis stimulant|STAT inhibitor, ABL1|SRC|BCR|CAMK2G|LYN|CAMK1D|CDK2|FRK|FYN|HCK|MAP2K1|MAP2K2|MAP3K2|MAP4K5|STK10|STK24|STK4|TNK2|TXK	25	ABL1	ABL proto-oncogene 1, non-receptor tyrosine kinase	Known	0.8428	0.8854	0.8854	0.5093	0.5429	0.7324	0.9966	8	1	1	0	0	0	0	1	1	0.0049	Y	1	TRUE	TRUE
BRD-A04756508	norgestimate	progesterone receptor agonist, PGR|ESR1	5578	PRKCA	protein kinase C alpha	pQSAR	0.946	0.8421	0.8421	0.1571	0.5	0.5	0.9965	2	1	1	0	0	0	0	0	0	0.0002	N	0	TRUE	FALSE
BRD-A48720949	testosterone	androgen receptor (AR) agonist|androgen receptor agonist|testosterone receptor agonist, AR|CYP19A1|CYP2C19|CYP2C8|CYP3A5	7124	TNF	tumor necrosis factor	pQSAR	0.8428	0.8841	0.8841	0.5308	0.5	0.5	0.9965	2	1	1	0	0	0	0	0	0	0.0049	N	0	TRUE	FALSE
BRD-A53131506	epitestosterone	inactive testosterone analog, AKR1C1|AKR1C2|AR	2099	ESR1	estrogen receptor 1	StructureLikely	0.4573	0.9299	0.9653	0.8398	0.5	0.5	0.9965	5	0	1	0	0	1	0	0	0	0.4233	N	0	FALSE	TRUE
BRD-A59303141	quinethazone	diuretic, CA1|CA2|SLC12A1|SLC12A2|SLC12A3	760	CA2	carbonic anhydrase 2	Known	0.724	0.9038	0.938	0.6489	0.5	0.5	0.9965	8	0	1	0	0	0	0	0	1	0.0329	Y	1	FALSE	TRUE
BRD-A61304759	tanespimycin	HSP inhibitor|CHK inhibitor|HSP antagonist, HSP90AA1|CHEK1	3551	IKBKB	inhibitor of nuclear factor kappa B kinase subunit beta	pQSAR	0.9259	0.8557	0.8557	0.2204	0.5	0.5168	0.9965	2	1	1	0	0	0	0	0	0	0.0005	N	0	TRUE	FALSE
BRD-A65013509	oxybutynin	acetylcholine receptor antagonist, CHRM3|CHRM1|CHRM2|CHRM4	1131	CHRM3	cholinergic receptor muscarinic 3	Known	0.7727	0.8968	0.8968	0.6782	0.5	0.5	0.9965	8	0	1	0	0	0	0	0	1	0.0166	Y	1	FALSE	TRUE
BRD-A68650781	epitiostanol	androgen receptor agonist|RNA directed RNA polymerase stimulant, AR	2100	ESR2	estrogen receptor 2	pQSAR	0.8236	0.8876	0.8876	0.564	0.5	0.5	0.9965	2	1	1	0	0	0	0	0	0	0.0071	N	0	TRUE	FALSE
BRD-A75726477	clenbuterol	adrenergic receptor agonist, ADRB2|ADRB1|ADRB3|NGF|TNF	7124	TNF	tumor necrosis factor	Known	0.6935	0.9079	0.9079	0.4049	0.4211	0.5	0.9965	8	0	1	0	0	0	0	0	1	0.0483	Y	1	FALSE	TRUE
BRD-A76941896	doxorubicin	topoisomerase inhibitor|DNA intercalating drug, TOP2A	9759	HDAC4	histone deacetylase 4	pQSAR	0.8731	0.8758	0.8758	0.1233	0.5	0.6457	0.9965	2	1	1	0	0	0	0	0	0	0.0025	N	0	TRUE	FALSE
BRD-K00603606	ticlopidine	purinergic receptor antagonist|platelet aggregation inhibitor, P2RY12|CYP2B6|CYP2C19	3269	HRH1	histamine receptor H1	pQSAR	0.8428	0.8834	0.8834	0.4824	0.5	0.5	0.9965	2	1	1	0	0	0	0	0	0	0.0049	N	0	TRUE	FALSE
BRD-K11196887	norfloxacin	topoisomerase inhibitor|DNA gyrase inhibitor, TOP2A	7153	TOP2A	DNA topoisomerase II alpha	Known	0.3416	0.9388	0.9659	0.9383	0.5	0.5	0.9965	8	0	1	0	0	1	0	0	1	0.7317	Y	1	FALSE	TRUE
BRD-K20285085	fostamatinib	syk inhibitor|FLT3 inhibitor, SYK|FLT3|RET	6790	AURKA	aurora kinase A	pIC50	0.8459	0.8833	0.8833	0.4895	0.5	0.5	0.9965	7	1	1	0	0	0	0	1	0	0.0046	N	0	TRUE	TRUE
BRD-K39965020	doconexent	PPAR receptor agonist|unidentified pharmacological activity, FFAR1|PPARA|PTGS1|PTGS2	5743	PTGS2	prostaglandin-endoperoxide synthase 2	Known	0.7727	0.8969	0.9719	0.9299	0.5	0.5	0.9965	8	0	1	0	0	1	0	0	1	0.0166	Y	1	FALSE	TRUE
BRD-K40476324	digoxin	ATPase inhibitor|ROR antagonist, ATP1A1|ABCB1|RORC|SLCO1B3	486	FXYD2	FXYD domain containing ion transport regulator 2	NCI60	0.3118	0.9409	0.9505	0.6405	0.5	0.8265	0.9965	3	0	1	1	0	0	0	0	0	0.7972	N	0	FALSE	TRUE
BRD-K43389675	daunorubicin	RNA synthesis inhibitor|topoisomerase inhibitor|DNA synthesis inhibitor|radical formation stimulant, TOP2A|TOP2B	5292	PIM1	Pim-1 proto-oncogene, serine/threonine kinase	pQSAR	0.8927	0.8694	0.8694	0.1773	0.5	0.7929	0.9965	2	1	1	0	0	0	0	0	0	0.0015	N	0	TRUE	FALSE
BRD-K52989797	clomipramine	serotonin transporter (SERT) inhibitor|dopamine transporter (DAT) inhibitor|norepinephrine transporter (NET) inhibitor, SLC6A4|SLC6A2|CYP2C19|GSTP1|HTR2A|HTR2B|HTR2C|SLC6A3	55107	ANO1	anoctamin 1	pQSAR	0.838	0.8853	0.8853	0.1611	0.5	0.5	0.9965	2	1	1	0	0	0	0	0	0	0.0054	N	0	TRUE	FALSE
BRD-K56064827	EI-273	PKC inhibitor, PRKCA|PRKCG	135	ADORA2A	adenosine A2a receptor	pQSAR	0.8037	0.8916	0.8916	0.1379	0.5	0.5	0.9965	2	1	1	0	0	0	0	0	0	0.0101	N	0	TRUE	FALSE
BRD-K69932463	AZD-8055	mTOR inhibitor, MTOR	5290	PIK3CA	phosphatidylinositol-4,5-bisphosphate 3-kinase catalytic subunit alpha	pIC50	0.8715	0.8769	0.8769	0.1692	0.5	0.5	0.9965	7	1	1	0	0	0	0	1	0	0.0026	N	0	TRUE	TRUE
BRD-K70592963	phenindione	vitamin antagonist, VKORC1	79001	VKORC1	vitamin K epoxide reductase complex subunit 1	Known	0.584	0.9187	0.9187	0.4608	0.5	0.5	0.9965	8	0	1	0	0	0	0	0	1	0.1558	Y	1	FALSE	TRUE
BRD-K73824630	skatole	thrombin inhibitor, F2	1131	CHRM3	cholinergic receptor muscarinic 3	pQSAR	0.8199	0.8891	0.8891	0.3381	0.5	0.5	0.9965	2	1	1	0	0	0	0	0	0	0.0076	N	0	TRUE	FALSE
BRD-K74133369	oligomycin-a	ATP synthase inhibitor|ATPase inhibitor, ATP5A1	7153	TOP2A	DNA topoisomerase II alpha	pQSAR	0.8032	0.8925	0.8925	0.1217	0.5	0.5	0.9965	2	1	1	0	0	0	0	0	0	0.0102	N	0	TRUE	FALSE
BRD-K88701661	dimercaptosuccinic-acid	chelating agent|DNA methyltransferase inhibitor, DNMT1	213	ALB	albumin	pQSAR	0.864	0.8792	0.8792	0.1096	0.5	0.5	0.9965	2	1	1	0	0	0	0	0	0	0.0031	N	0	TRUE	FALSE
BRD-K96778649	tyrphostin-47	EGFR inhibitor|epidermal growth factor receptor (EGFR) inhibitor, EGFR	7124	TNF	tumor necrosis factor	NCI60	0.425	0.9323	0.9323	0.4398	0.5	0.8031	0.9965	3	0	1	1	0	0	0	0	0	0.5115	N	0	FALSE	TRUE
BRD-A17655518	ibuprofen	cyclooxygenase inhibitor|NFkB pathway inhibitor, PTGS2|PTGS1|ASIC1|BCL2|CFTR|CYP2C8|FABP2|PLAT|PPARG|SLC5A8|THBD	5743	PTGS2	prostaglandin-endoperoxide synthase 2	Known	0.7692	0.8962	0.9761	0.9908	0.5	0.5	0.9964	8	0	1	0	0	1	1	0	1	0.0175	Y	1	FALSE	TRUE
BRD-A42649439	triciribine	AKT inhibitor, AKT1|AKT2|AKT3	1738	DLD	dihydrolipoamide dehydrogenase	pQSAR	0.884	0.8713	0.8713	0.4608	0.5	0.5	0.9964	2	1	1	0	0	0	0	0	0	0.0019	N	0	TRUE	FALSE
BRD-A48809242	IB-MECA	adenosine receptor agonist|granulocyte colony stimulating factor agonist, ADORA3|ADORA1|ADORA2A|ADORA2B	3615	IMPDH2	inosine monophosphate dehydrogenase 2	pQSAR	0.9062	0.8638	0.8638	0.5165	0.5	0.5	0.9964	2	1	1	0	0	0	0	0	0	0.001	N	0	TRUE	FALSE
BRD-A58955223	sulforaphane	anticancer agent|aryl hydrocarbon receptor antagonist|nuclear factor erythroid derived, like (NRF2) activator, NFE2L2	2167	FABP4	fatty acid binding protein 4	pQSAR	0.9259	0.8545	0.8545	0.1053	0.5	0.5	0.9964	2	1	1	0	0	0	0	0	0	0.0005	N	0	TRUE	FALSE
BRD-A67479912	progesterone	progesterone receptor agonist, PGR|CYP17A1|NR3C2|CATSPER1|CATSPER2|CATSPER3|CATSPER4|CYP2C19|ESR1|OPRK1|TRPC5	2100	ESR2	estrogen receptor 2	pQSAR	0.8881	0.8703	0.8703	0.2608	0.5	0.5103	0.9964	2	1	1	0	0	0	0	0	0	0.0017	N	0	TRUE	FALSE
BRD-A80638690	floxuridine	DNA synthesis inhibitor|MDCK inhibitor|PEPT1 inhibitor|pyrimidine antagonist, TYMS	1786	DNMT1	DNA methyltransferase 1	pQSAR	0.8684	0.8767	0.8884	0.6808	0.5	0.6181	0.9964	2	1	1	0	0	0	0	0	0	0.0028	N	0	TRUE	FALSE
BRD-A82371568	clofarabine	ribonucleoside reductase inhibitor|DNA polymerase inhibitor|DNA repair enzyme inhibitor|DNA synthesis inhibitor|ribonucleotide reductase inhibitor, RRM1|POLA1|RRM2|SLC22A8	7153	TOP2A	DNA topoisomerase II alpha	pQSAR	0.9168	0.8592	0.8592	0.1692	0.5585	0.6977	0.9964	2	1	1	0	0	0	0	0	0	0.0007	N	0	TRUE	FALSE
BRD-A93236127	digitoxin	ATPase inhibitor, ATP1A1	5243	ABCB1	ATP binding cassette subfamily B member 1	StructureLikely	0.8748	0.8744	0.9724	0.9299	0.7845	0.5423	0.9964	5	1	1	0	0	1	0	0	0	0.0024	N	0	TRUE	TRUE
BRD-K01292756	pimozide	dopamine receptor antagonist|dopamine receptor|opioid receptor antagonist|serotonin receptor antagonist, DRD2|DRD3|CACNA1I|CALM1|HRH1|HTR1A|HTR2A|KCNA10|KCNH2	801	CALM1	calmodulin 1	Known	0.678	0.9082	0.9082	0.6606	0.5	0.5	0.9964	8	0	1	0	0	0	0	0	1	0.0581	Y	1	FALSE	TRUE
BRD-K02404261	caffeine	adenosine receptor antagonist|ATM kinase inhibitor|ATR kinase inhibitor, ADORA1|ADORA2A|ADORA2B|ATM|ITPR1|RYR1|ADORA3|ATR|ITPR2|ITPR3|PDE10A|PDE11A|PDE1A|PDE1B|PDE1C|PDE2A|PDE3A|PDE3B|PDE4A|PDE4B|PDE4C|PDE4D|PDE5A|PDE6A|PDE6B|PDE6C|PDE7A|PDE7B|PDE8A|PDE8B|PDE9A|PIK3CA|PIK3CB|PIK3CD|PRKDC|RYR2|RYR3	5743	PTGS2	prostaglandin-endoperoxide synthase 2	pQSAR	0.884	0.872	0.872	0.2419	0.5	0.5	0.9964	2	1	1	0	0	0	0	0	0	0.0019	N	0	TRUE	FALSE
BRD-K11433652	aspirin	cyclooxygenase inhibitor|nitric oxide donor|platelet aggregation inhibitor|thromboxane synthase inhibitor|TP53 expression enhancer, PTGS1|PTGS2|TP53|AKR1C1|ASIC3|EDNRA|HSPA5|IKBKB|NFKB1|NFKB2|NFKBIA|PRKAA1|PRKAA2|PRKAB1|PRKAB2|PRKAG1|PRKAG2|PRKAG3|RPS6KA3	1577	CYP3A5	cytochrome P450 family 3 subfamily A member 5	pQSAR	0.8684	0.8756	0.8756	0.3497	0.5	0.5	0.9964	2	1	1	0	0	0	0	0	0	0.0028	N	0	TRUE	FALSE
BRD-K17041687	diflorasone	corticosteroid agonist|cytochrome P450 inhibitor|glucocorticoid receptor agonist|immunosuppressant, NR3C1|PLA2G1B	2697	GJA1	gap junction protein alpha 1	pQSAR	0.8491	0.8814	0.8814	0.146	0.5	0.5	0.9964	2	1	1	0	0	0	0	0	0	0.0043	N	0	TRUE	FALSE
BRD-K25433859	maprotiline	norepinephrine reputake inhibitor|tricyclic antidepressant (TCA), SLC6A2|ADRA1A|ADRA1B|ADRA1D|ADRA2A|ADRA2B|ADRA2C|CHRM1|CHRM2|CHRM3|CHRM4|CHRM5|DRD2|HRH1|HTR2A|HTR2C|HTR7	3358	HTR2C	5-hydroxytryptamine receptor 2C	Known	0.3878	0.9342	0.9342	0.9908	0.5	0.5	0.9964	8	0	1	0	0	1	1	0	1	0.6136	Y	1	FALSE	TRUE
BRD-K29582115	ziprasidone	dopamine receptor antagonist|serotonin receptor antagonist|norepinephrine reuptake inhibitor|serotonin receptor agonist|serotonin reuptake inhibitor, DRD2|HTR2A|HTR1A|HTR1D|HRH1|HTR1B|HTR1E|HTR2C|HTR7|ADRA1A|ADRA1B|ADRA2A|ADRA2B|ADRA2C|CHRM1|CHRM2|CHRM3|CHRM4|CHRM5|DRD1|DRD3|DRD4|DRD5|HTR3A|HTR6|SLC6A4	1128	CHRM1	cholinergic receptor muscarinic 1	Known	0.4319	0.9311	0.9311	0.4967	0.5	0.5	0.9964	8	0	1	0	0	0	0	0	1	0.4924	Y	1	FALSE	TRUE
BRD-K29582115	ziprasidone	dopamine receptor antagonist|serotonin receptor antagonist|norepinephrine reuptake inhibitor|serotonin receptor agonist|serotonin reuptake inhibitor, DRD2|HTR2A|HTR1A|HTR1D|HRH1|HTR1B|HTR1E|HTR2C|HTR7|ADRA1A|ADRA1B|ADRA2A|ADRA2B|ADRA2C|CHRM1|CHRM2|CHRM3|CHRM4|CHRM5|DRD1|DRD3|DRD4|DRD5|HTR3A|HTR6|SLC6A4	150	ADRA2A	adrenoceptor alpha 2A	Known	0.4301	0.9311	0.9311	0.5595	0.5	0.5	0.9964	8	0	1	0	0	0	0	0	1	0.4973	Y	1	FALSE	TRUE
BRD-K32681104	2-aminobenzenesulfonamide	carbonic anhydrase B inhibitor, CA12|CA14|CA2|CA6|CA9	771	CA12	carbonic anhydrase 12	Known	0.4609	0.9286	0.9286	0.5165	0.5	0.5	0.9964	8	0	1	0	0	0	0	0	1	0.4139	Y	1	FALSE	TRUE
BRD-K34730807	levodopa	dopamine precursor|dopamine receptor agonist, DDC|DRD1|DRD2|DRD3|DRD4|DRD5|GPR143	1644	DDC	dopa decarboxylase	Known	0.5909	0.9174	0.9495	0.6363	0.5	0.5	0.9964	8	0	1	0	0	0	0	0	1	0.146	Y	1	FALSE	TRUE
BRD-K35240538	methylprednisolone	glucocorticoid receptor agonist, NR3C1	1645	AKR1C1	aldo-keto reductase family 1 member C1	pQSAR	0.83	0.8852	0.8852	0.2608	0.5	0.5	0.9964	2	1	1	0	0	0	0	0	0	0.0063	N	0	TRUE	FALSE
BRD-K54256913	MK-1775	wee1 kinase inhibitor, WEE1	3551	IKBKB	inhibitor of nuclear factor kappa B kinase subunit beta	pQSAR	0.8009	0.891	0.891	0.2608	0.5	0.5	0.9964	2	1	1	0	0	0	0	0	0	0.0106	N	0	TRUE	FALSE
BRD-K56064827	EI-273	PKC inhibitor, PRKCA|PRKCG	5053	PAH	phenylalanine hydroxylase	pQSAR	0.8009	0.8914	0.8914	0.1773	0.5	0.5	0.9964	2	1	1	0	0	0	0	0	0	0.0106	N	0	TRUE	FALSE
BRD-K62310379	fluticasone	glucocorticoid receptor agonist, NR3C1|CYP3A5|CYP3A7|NR3C2|PGR|PLA2G4A	1131	CHRM3	cholinergic receptor muscarinic 3	pQSAR	0.9003	0.8653	0.8653	0.1217	0.5	0.5	0.9964	2	1	1	0	0	0	0	0	0	0.0012	N	0	TRUE	FALSE
BRD-K63675182	triflupromazine	acetylcholine receptor ligand|dopamine receptor, HTR2B|CHRM1|CHRM2|CHRNA7|DRD1|DRD2	1577	CYP3A5	cytochrome P450 family 3 subfamily A member 5	pQSAR	0.8699	0.8754	0.8754	0.3613	0.5	0.5	0.9964	2	1	1	0	0	0	0	0	0	0.0027	N	0	TRUE	FALSE
BRD-K72414522	AZD-5438	CDK inhibitor, CCNB1|CCNE1|CDK1|CDK2|KCNH2	3717	JAK2	Janus kinase 2	pQSAR	0.8185	0.8879	0.8879	0.2312	0.5	0.5	0.9964	2	1	1	0	0	0	0	0	0	0.0078	N	0	TRUE	FALSE
BRD-K97309399	thiothixene	dopamine receptor|dopamine receptor antagonist, HTR2A|DRD1|DRD2|HRH1	1577	CYP3A5	cytochrome P450 family 3 subfamily A member 5	pQSAR	0.8699	0.8758	0.8758	0.2419	0.5	0.7157	0.9964	2	1	1	0	0	0	0	0	0	0.0027	N	0	TRUE	FALSE
BRD-A27887842	prednisolone	glucocorticoid receptor agonist, NR3C1|NR3C2|SERPINA6	3551	IKBKB	inhibitor of nuclear factor kappa B kinase subunit beta	pQSAR	0.8171	0.8867	0.8867	0.3149	0.5	0.5	0.9963	2	1	1	0	0	0	0	0	0	0.008	N	0	TRUE	FALSE
BRD-A37630846	daunorubicin	RNA synthesis inhibitor|topoisomerase inhibitor|DNA synthesis inhibitor|radical formation stimulant, TOP2A|TOP2B	7153	TOP2A	DNA topoisomerase II alpha	Known	0.664	0.9092	0.9754	0.9908	0.5	0.8319	0.9963	8	0	1	1	0	1	1	0	1	0.0682	Y	1	FALSE	TRUE
BRD-A58753560	budesonide	glucocorticoid receptor agonist|glucocordicoid receptor antagonist|immunosuppressant, NR3C1|CYP3A5|CYP3A7	3320	HSP90AA1	heat shock protein 90 alpha family class A member 1	pQSAR	0.8765	0.8731	0.8731	0.1692	0.5	0.5	0.9963	2	1	1	0	0	0	0	0	0	0.0023	N	0	TRUE	FALSE
BRD-A67799922	phenoxybenzamine	adrenergic receptor antagonist, ADRA2B|ADRA1A|ADRA1B|ADRA1D|ADRA2A|ADRA2C|ADRB2|CALM1	2099	ESR1	estrogen receptor 1	pQSAR	0.8561	0.8778	0.8778	0.5236	0.5	0.5	0.9963	2	1	1	0	0	0	0	0	0	0.0037	N	0	TRUE	FALSE
BRD-A82371568	clofarabine	ribonucleoside reductase inhibitor|DNA polymerase inhibitor|DNA repair enzyme inhibitor|DNA synthesis inhibitor|ribonucleotide reductase inhibitor, RRM1|POLA1|RRM2|SLC22A8	6241	RRM2	ribonucleotide reductase regulatory subunit M2	Known	0.7286	0.9016	0.944	0.814	0.5	0.8007	0.9963	8	0	1	1	0	1	0	0	1	0.031	Y	1	FALSE	TRUE
BRD-A87719232	naproxen	cyclooxygenase inhibitor, PTGS2|PTGS1	5743	PTGS2	prostaglandin-endoperoxide synthase 2	Known	0.8783	0.8723	0.9758	0.9908	0.5	0.5	0.9963	8	1	1	0	0	1	1	0	1	0.0022	Y	1	TRUE	TRUE
BRD-A91008255	bepridil	calcium channel blocker|L-type calcium channel blocker, ATP1A1|CACNA1A|CACNA1C|CACNA1H|CACNA2D2|CALM1|KCNQ1|KCNQ4|PDE1A|PDE1B|SCN5A|TNNC1	5292	PIM1	Pim-1 proto-oncogene, serine/threonine kinase	pQSAR	0.9003	0.864	0.864	0.1531	0.5	0.5	0.9963	2	1	1	0	0	0	0	0	0	0.0012	N	0	TRUE	FALSE
BRD-K00198051	zuclopenthixol	dopamine receptor antagonist, DRD2|DRD1|ADRA1A|ADRA2A|DRD5|HRH1|HTR2A	150	ADRA2A	adrenoceptor alpha 2A	Known	0.3604	0.9361	0.9391	0.9908	0.5	0.5	0.9963	8	0	1	0	0	1	1	0	1	0.6855	Y	1	FALSE	TRUE
BRD-K06080977	eicosatetraynoic-acid	cyclooxygenase inhibitor|lipoxygenase inhibitor, ALOX12|PPARA|PPARG|PTGS1	5468	PPARG	peroxisome proliferator activated receptor gamma	Known	0.599	0.9164	0.9566	0.6782	0.5	0.5	0.9963	8	0	1	0	0	0	0	0	1	0.135	Y	1	FALSE	TRUE
BRD-K18194590	mephentermine	adrenergic receptor agonist, ADRA1A|ADRA1B|ADRA1D|ADRA2A|ADRA2B|ADRA2C|ADRB1|ADRB2|ADRB3	2099	ESR1	estrogen receptor 1	pQSAR	0.8157	0.8879	0.8879	0.1338	0.5	0.5	0.9963	2	1	1	0	0	0	0	0	0	0.0082	N	0	TRUE	FALSE
BRD-K18194590	mephentermine	adrenergic receptor agonist, ADRA1A|ADRA1B|ADRA1D|ADRA2A|ADRA2B|ADRA2C|ADRB1|ADRB2|ADRB3	2554	GABRA1	gamma-aminobutyric acid type A receptor subunit alpha1	pQSAR	0.8428	0.8819	0.8819	0.2716	0.5	0.5	0.9963	2	1	1	0	0	0	0	0	0	0.0049	N	0	TRUE	FALSE
BRD-K19540840	saracatinib	src inhibitor|Abl kinase inhibitor, SRC|ABL1|LCK|YES1	207	AKT1	AKT serine/threonine kinase 1	pQSAR	0.8003	0.8901	0.8901	0.4049	0.5	0.5	0.9963	2	1	1	0	0	0	0	0	0	0.0107	N	0	TRUE	FALSE
BRD-K30649484	mafenide	carbonic anhydrase inhibitor|unidentified pharmacological activity, CA6|CA12|CA14|CA2|CA4|CA9	5479	PPIB	peptidylprolyl isomerase B	pQSAR	0.848	0.8804	0.8804	0.1031	0.5	0.5	0.9963	2	1	1	0	0	0	0	0	0	0.0044	N	0	TRUE	FALSE
BRD-K35708212	ouabain	ATPase inhibitor|alpha subunit binder, ATP1A1|ATP1A2|ATP1A3|ATP1A4|ATP1B1|ATP1B2|ATP1B3|ATP1B4|FXYD2	7153	TOP2A	DNA topoisomerase II alpha	pQSAR	0.8765	0.8721	0.8721	0.2312	0.5961	0.6412	0.9963	2	1	1	0	0	0	0	0	0	0.0023	N	0	TRUE	FALSE
BRD-K45149020	amcinonide	corticosteroid agonist|cytochrome P450 inhibitor|glucocorticoid receptor agonist|immunosuppressant, NR3C1|ANXA1	1577	CYP3A5	cytochrome P450 family 3 subfamily A member 5	StructureLikely	0.5518	0.9205	0.9661	0.8465	0.5	0.5	0.9963	5	0	1	0	0	1	0	0	0	0.2084	N	0	FALSE	TRUE
BRD-K49657628	tyrphostin-AG-18	epidermal growth factor receptor (EGFR) inhibitor|tyrosine kinase inhibitor, EGFR	9	NAT1	N-acetyltransferase 1	pQSAR	0.8037	0.8902	0.8902	0.2419	0.5	0.5	0.9963	2	1	1	0	0	0	0	0	0	0.0101	N	0	TRUE	FALSE
BRD-K51980294	syringic-acid	carbonic anhydrase inhibitor, CA1|CA12|CA14|CA2|CA4|CA6|CA9	760	CA2	carbonic anhydrase 2	Known	0.5189	0.9233	0.9442	0.7205	0.5	0.5	0.9963	8	0	1	0	0	0	0	0	1	0.2735	Y	1	FALSE	TRUE
BRD-K52989797	clomipramine	serotonin transporter (SERT) inhibitor|dopamine transporter (DAT) inhibitor|norepinephrine transporter (NET) inhibitor, SLC6A4|SLC6A2|CYP2C19|GSTP1|HTR2A|HTR2B|HTR2C|SLC6A3	3358	HTR2C	5-hydroxytryptamine receptor 2C	Known	0.1629	0.9524	0.9625	0.8734	0.5	0.5	0.9963	8	0	1	0	0	1	0	1	1	0.9748	Y	1	FALSE	TRUE
BRD-K56810756	fomepizole	alcohol dehydrogenase inhibitor, ADH1A|ADH1B|ADH1C|AKR1A1|CAT	2053	EPHX2	epoxide hydrolase 2	pQSAR	0.8748	0.8726	0.8726	0.1041	0.5	0.5	0.9963	2	1	1	0	0	0	0	0	0	0.0024	N	0	TRUE	FALSE
BRD-K68202742	trichostatin-a	HDAC inhibitor|CDK expression enhancer|ID1 expression inhibitor, HDAC7|HDAC8|HDAC1|HDAC10|HDAC2|HDAC3|HDAC4|HDAC5|HDAC6|HDAC9	3065	HDAC1	histone deacetylase 1	Known	0.8654	0.8758	0.9741	0.9908	0.5	0.8919	0.9963	8	1	1	1	0	1	1	1	1	0.003	Y	1	TRUE	TRUE
BRD-K68867920	quetiapine	dopamine receptor antagonist|serotonin receptor antagonist|adrenergic receptor antagonist|histamine receptor antagonist, DRD2|HTR1A|HTR2A|DRD1|HRH1|HTR1D|HTR1E|ADRA1A|ADRA1B|ADRA1D|ADRA2A|ADRA2B|ADRA2C|CHRM1|CHRM2|CHRM3|CHRM4|CHRM5|DRD3|DRD4|DRD5|HTR1B|HTR1F|HTR2C|HTR3A|HTR6|HTR7|SLC6A2	3358	HTR2C	5-hydroxytryptamine receptor 2C	Known	0.3094	0.94	0.94	0.5504	0.5	0.5	0.9963	8	0	1	0	0	0	0	0	1	0.8022	Y	1	FALSE	TRUE
BRD-K71499074	diclofenamide	carbonic anhydrase inhibitor, CA1|CA2|CA4|CA12|CA7	1786	DNMT1	DNA methyltransferase 1	pQSAR	0.8361	0.8832	0.8832	0.1264	0.5	0.5	0.9963	2	1	1	0	0	0	0	0	0	0.0056	N	0	TRUE	FALSE
BRD-K86434416	selegiline	monoamine oxidase inhibitor|superoxide dismutase stimulant, MAOB|MAOA|CYP2B6|CYP2C19	4129	MAOB	monoamine oxidase B	Known	0.7254	0.9018	0.9437	0.6983	0.5	0.5	0.9963	8	0	1	0	0	0	0	0	1	0.0323	Y	1	FALSE	TRUE
BRD-K89104321	gaboxadol	GABA receptor agonist|GABA receptor partial agonist, GABRD|GABRA1|GABRA2|GABRA3|GABRA4|GABRA5|GABRA6|GABRR1|GABRR2|GABRR3	1128	CHRM1	cholinergic receptor muscarinic 1	pQSAR	0.8626	0.8761	0.8761	0.1202	0.5	0.5	0.9963	2	1	1	0	0	0	0	0	0	0.0032	N	0	TRUE	FALSE
BRD-K91370081	anisomycin	DNA synthesis inhibitor, NHP2L1|RPL10L|RPL11|RPL13A|RPL15|RPL19|RPL23|RPL23A|RPL26L1|RPL3|RPL37|RPL8|RSL24D1	5970	RELA	RELA proto-oncogene, NF-kB subunit	pQSAR	0.8343	0.8835	0.8835	0.1692	0.7255	0.5	0.9963	2	1	1	0	0	0	0	0	0	0.0058	N	0	TRUE	FALSE
BRD-K97399794	quercetin	aldose reductase inhibitor|cytokine production inhibitor|EGFR inhibitor|glucosidase inhibitor|monoamine oxidase inhibitor|polar auxin transport inhibitor|quorum sensing signaling modulator|SIRT activator|sodium channel blocker|tyrosine phosphatase inhibitor|xanthine oxidase inhibitor, PIK3CG|AKR1B1|ATP5A1|ATP5B|ATP5C1|CYP2C8|EGFR|GAA|HCK|HIBCH|MAOA|PIM1|PTPN1|SCN5A|SIRT1|STK17B|UGT3A1|XDH	509	ATP5F1C	ATP synthase F1 subunit gamma	Known	0.7747	0.8951	0.8951	0.4049	0.5	0.5	0.9963	8	0	1	0	0	0	0	0	1	0.0161	Y	1	FALSE	TRUE
BRD-K97509413	coumestrol	AGE inhibitor|estrogen receptor agonist|estrogen receptor ligand, ESR1|ESR2	2099	ESR1	estrogen receptor 1	Known	0.4868	0.9262	0.9262	0.4165	0.5	0.6073	0.9963	8	0	1	0	0	0	0	1	1	0.3478	Y	1	FALSE	TRUE
BRD-K99964838	bosutinib	src inhibitor|Abl kinase inhibitor|Bcr-Abl kinase inhibitor|apoptosis stimulant|STAT inhibitor, ABL1|SRC|BCR|CAMK2G|LYN|CAMK1D|CDK2|FRK|FYN|HCK|MAP2K1|MAP2K2|MAP3K2|MAP4K5|STK10|STK24|STK4|TNK2|TXK	3932	LCK	LCK proto-oncogene, Src family tyrosine kinase	pIC50	0.8244	0.8854	0.8854	0.5093	0.6822	0.7324	0.9963	7	1	1	0	0	0	0	1	0	0.007	N	0	TRUE	TRUE
BRD-A01320529	salmeterol	adrenergic receptor agonist, ADRB2	154	ADRB2	adrenoceptor beta 2	Known	0.613	0.9135	0.9135	0.6782	0.5	0.5	0.9962	8	0	1	0	0	0	0	1	1	0.1175	Y	1	FALSE	TRUE
BRD-A13122391	triptolide	RNA polymerase inhibitor, CYP2C19|RELA	6240	RRM1	ribonucleotide reductase catalytic subunit M1	pQSAR	0.8009	0.889	0.889	0.117	0.6683	0.4683	0.9962	2	1	1	0	0	0	0	0	0	0.0106	N	0	TRUE	FALSE
BRD-A17655518	ibuprofen	cyclooxygenase inhibitor|NFkB pathway inhibitor, PTGS2|PTGS1|ASIC1|BCL2|CFTR|CYP2C8|FABP2|PLAT|PPARG|SLC5A8|THBD	1386	ATF2	activating transcription factor 2	pQSAR	0.8502	0.8785	0.8785	0.15	0.5	0.5	0.9962	2	1	1	0	0	0	0	0	0	0.0042	N	0	TRUE	FALSE
BRD-A17655518	ibuprofen	cyclooxygenase inhibitor|NFkB pathway inhibitor, PTGS2|PTGS1|ASIC1|BCL2|CFTR|CYP2C8|FABP2|PLAT|PPARG|SLC5A8|THBD	5468	PPARG	peroxisome proliferator activated receptor gamma	Known	0.8408	0.881	0.9761	0.9908	0.5	0.5	0.9962	8	1	1	0	0	1	1	0	1	0.0051	Y	1	TRUE	TRUE
BRD-A59174698	ritodrine	adrenergic receptor agonist, ADRB2	154	ADRB2	adrenoceptor beta 2	Known	0.494	0.9242	0.9549	0.7465	0.5	0.5	0.9962	8	0	1	0	0	0	0	1	1	0.3302	Y	1	FALSE	TRUE
BRD-A59808129	guggulsterone	estrogen receptor agonist|FXR antagonist|progesterone receptor agonist|cholesterol inhibitor|IKK inhibitor|PXR agonist, NR1H4|PGR|AR|ESR1|IKBKB|NR1I2|NR3C1|NR3C2	1577	CYP3A5	cytochrome P450 family 3 subfamily A member 5	pQSAR	0.8502	0.8788	0.9579	0.729	0.5	0.5	0.9962	2	1	1	0	0	0	0	0	0	0.0042	N	0	TRUE	FALSE
BRD-A69951442	dexamethasone	glucocorticoid receptor agonist|corticosteroid agonist|immunosuppressant, ANXA1|CYP3A4|CYP3A5|NOS2|NR0B1|NR3C1|NR3C2	866	SERPINA6	serpin family A member 6	StructureSure	0.6183	0.9135	0.9737	0.9683	0.5	0.5	0.9962	6	0	1	0	0	1	1	0	0	0.1114	N	0	FALSE	TRUE
BRD-K15108141	gemcitabine	cell cycle inhibitor|DNA repair enzyme inhibitor|DNA synthesis inhibitor|pyrimidine antagonist|ribonucleoside reductase inhibitor|ribonucleotide reductase inhibitor, RRM1|CMPK1|RRM2|TYMS	7155	TOP2B	DNA topoisomerase II beta	pQSAR	0.8599	0.8761	0.8761	0.1128	0.5	0.5	0.9962	2	1	1	0	0	0	0	0	0	0.0034	N	0	TRUE	FALSE
BRD-K32795028	1-benzylimidazole	thromboxane synthase inhibitor, CYP11B1|QPCT	50846	DHH	desert hedgehog signaling molecule	pQSAR	0.8783	0.8705	0.8705	0.3149	0.5	0.5	0.9962	2	1	1	0	0	0	0	0	0	0.0022	N	0	TRUE	FALSE
BRD-K33583600	isoliquiritigenin	guanylate cyclase activator|aldose reductase inhibitor|glutamate receptor antagonist|histamine receptor antagonist|SIRT activator, AKR1B1|HRH2|SIRT1	23411	SIRT1	sirtuin 1	Known	0.3578	0.9355	0.967	0.9355	0.5	0.5	0.9962	8	0	1	0	0	1	0	0	1	0.6922	Y	1	FALSE	TRUE
BRD-K35520305	dacarbazine	DNA alkylating drug, PGD|POLA2	4860	PNP	purine nucleoside phosphorylase	pQSAR	0.8561	0.8769	0.8769	0.1531	0.5	0.5399	0.9962	2	1	1	0	0	0	0	0	0	0.0037	N	0	TRUE	FALSE
BRD-K35559145	levomepromazine	dopamine receptor, ADRA1A|ADRA1B|ADRA1D|ADRA2A|ADRA2B|ADRA2C|CHRM1|CHRM2|CHRM3|CHRM4|CHRM5|DRD1|DRD2|DRD3|DRD4|DRD5|HRH1|HTR2A|HTR2C	3358	HTR2C	5-hydroxytryptamine receptor 2C	Known	0.2503	0.9441	0.9441	0.6878	0.5	0.5	0.9962	8	0	1	0	0	0	0	0	1	0.8998	Y	1	FALSE	TRUE
BRD-K39915878	loxapine	dopamine receptor antagonist|serotonin receptor antagonist|dopamine receptor ligand, DRD2|DRD3|DRD4|DRD1|HRH1|HTR2A|HTR2C|HTR6|ADRA1A|ADRA1B|ADRA2A|ADRA2B|ADRA2C|ADRB1|CHRM1|CHRM2|CHRM3|CHRM4|CHRM5|DRD5|HRH2|HRH4|HTR1A|HTR1B|HTR1D|HTR1E|HTR3A|HTR5A|HTR7|SLC6A2|SLC6A3|SLC6A4	2558	GABRA5	gamma-aminobutyric acid type A receptor subunit alpha5	StructureLikely	0.2319	0.9458	0.9584	0.9092	0.5	0.5	0.9962	5	0	1	0	0	1	0	0	0	0.9218	N	0	FALSE	TRUE
BRD-K40476324	digoxin	ATPase inhibitor|ROR antagonist, ATP1A1|ABCB1|RORC|SLCO1B3	481	ATP1B1	ATPase Na+/K+ transporting subunit beta 1	NCI60	0.2906	0.9409	0.9505	0.6405	0.5	0.8265	0.9962	3	0	1	1	0	0	0	0	0	0.8378	N	0	FALSE	TRUE
BRD-K62959606	sphingosine	ceramidase inhibitor, GLTP|PVR|TRPM3	3156	HMGCR	3-hydroxy-3-methylglutaryl-CoA reductase	pQSAR	0.8236	0.885	0.885	0.1217	0.5	0.5	0.9962	2	1	1	0	0	0	0	0	0	0.0071	N	0	TRUE	FALSE
BRD-K64052750	gefitinib	EGFR inhibitor, EGFR|CYP2C19	1956	EGFR	epidermal growth factor receptor	Known	0.8731	0.8729	0.9524	0.814	0.5	0.7731	0.9962	8	1	1	0	0	1	0	1	1	0.0025	Y	1	TRUE	TRUE
BRD-K72420232	WZ-4002	EGFR inhibitor, EGFR|ERBB2	2064	ERBB2	erb-b2 receptor tyrosine kinase 2	Known	0.7399	0.8991	0.8991	0.4165	0.5	0.5	0.9962	8	0	1	0	0	0	0	1	1	0.0266	Y	1	FALSE	TRUE
BRD-K74927006	cinnarizine	calcium ion channel antagonist|histamine receptor antagonist, HRH1|CACNA1C|CACNA1D|CACNA1F|CACNA1G|CACNA1H|CACNA1I|CACNA1S|CHRM1|CHRM2|CHRM3|CHRM4|CHRM5|DRD1|DRD2|DRD5	801	CALM1	calmodulin 1	StructureLikely	0.5585	0.9192	0.9654	0.9355	0.5	0.5	0.9962	5	0	1	0	0	1	0	0	0	0.1965	N	0	FALSE	TRUE
BRD-K88741031	methyl-2,5-dihydroxycinnamate	EGFR inhibitor|tyrosine kinase inhibitor, EGFR	3932	LCK	LCK proto-oncogene, Src family tyrosine kinase	pQSAR	0.8178	0.8858	0.8858	0.4608	0.5	0.5	0.9962	2	1	1	0	0	0	0	0	0	0.0079	N	0	TRUE	FALSE
BRD-K99964838	bosutinib	src inhibitor|Abl kinase inhibitor|Bcr-Abl kinase inhibitor|apoptosis stimulant|STAT inhibitor, ABL1|SRC|BCR|CAMK2G|LYN|CAMK1D|CDK2|FRK|FYN|HCK|MAP2K1|MAP2K2|MAP3K2|MAP4K5|STK10|STK24|STK4|TNK2|TXK	3717	JAK2	Janus kinase 2	pQSAR	0.8715	0.8727	0.8727	0.1773	0.5385	0.5	0.9962	2	1	1	0	0	0	0	0	0	0.0026	N	0	TRUE	FALSE
BRD-A16311756	profenamine	butyrylcholinesterase inhibitors|cholinergic receptor antagonist|glutamate receptor antagonist, CHRM1|BCHE|CHRM2|GRIN3A	116443	GRIN3A	glutamate ionotropic receptor NMDA type subunit 3A	Known	0.5082	0.9224	0.9224	0.2823	0.5	0.5	0.9961	8	0	1	0	0	0	0	0	1	0.2973	Y	1	FALSE	TRUE
BRD-A17448384	beclometasone	glucocorticoid receptor agonist|corticosteroid hormone receptor agonist|immunosuppressant, NR3C1|CYP3A5|GPR97|SERPINA6	1577	CYP3A5	cytochrome P450 family 3 subfamily A member 5	Known	0.4847	0.9246	0.9685	0.9146	0.5	0.5	0.9961	8	0	1	0	0	1	0	0	1	0.3529	Y	1	FALSE	TRUE
BRD-A35033682	eriodictyol	cytochrome P450 inhibitor|TRPM3 antagonist|xanthine oxidase inhibitor, CYP1B1|NFE2L2|XDH	4128	MAOA	monoamine oxidase A	pQSAR	0.815	0.8856	0.9218	0.6405	0.5	0.5	0.9961	2	1	1	0	0	0	0	0	0	0.0083	N	0	TRUE	FALSE
BRD-A61194565	benserazide	dopa decarboxylase (aromatic L-amino acid decarboxylase) inhibitor, DDC	4780	NFE2L2	NFE2 like bZIP transcription factor 2	pQSAR	0.8178	0.885	0.885	0.1733	0.5	0.5	0.9961	2	1	1	0	0	0	0	0	0	0.0079	N	0	TRUE	FALSE
BRD-A76941896	doxorubicin	topoisomerase inhibitor|DNA intercalating drug, TOP2A	10381	TUBB3	tubulin beta 3 class III	pQSAR	0.8098	0.8867	0.8867	0.1298	0.5	0.5269	0.9961	2	1	1	0	0	0	0	0	0	0.0091	N	0	TRUE	FALSE
BRD-K10843433	phenylbutazone	cyclooxygenase inhibitor|platelet aggregation inhibitor|prostanoid receptor inhibitor, PTGS2|PTGS1|PTGIS	5468	PPARG	peroxisome proliferator activated receptor gamma	pQSAR	0.9168	0.8551	0.8551	0.2419	0.5	0.5	0.9961	2	1	1	0	0	0	0	0	0	0.0007	N	0	TRUE	FALSE
BRD-K12343256	trametinib	MEK inhibitor, MAP2K1|MAP2K2|CYP2C8|CYP3A4	5605	MAP2K2	mitogen-activated protein kinase kinase 2	Known	0.8199	0.8844	0.8844	0.2716	0.4834	0.8546	0.9961	8	1	1	1	0	0	0	0	1	0.0076	Y	1	TRUE	TRUE
BRD-K30207000	dexamethasone	glucocorticoid receptor agonist|corticosteroid agonist|immunosuppressant, ANXA1|CYP3A4|CYP3A5|NOS2|NR0B1|NR3C1|NR3C2	866	SERPINA6	serpin family A member 6	StructureLikely	0.2797	0.9412	0.9671	0.8332	0.5	0.5	0.9961	5	0	1	0	0	1	0	0	0	0.8565	N	0	FALSE	TRUE
BRD-K39391626	ethylestrenol	anabolic steroid, has some progesterone-like activity, AR	367	AR	androgen receptor	Known	0.4052	0.9312	0.9312	0.5765	0.5	0.5	0.9961	8	0	1	0	0	0	0	0	1	0.5661	Y	1	FALSE	TRUE
BRD-K52459643	prostaglandin-e1	prostanoid receptor agonist|prostanoid receptor antagonist, PTGER1|PTGER2|CATSPER1|CATSPER2|CATSPER3|CATSPER4|PTGDR|PTGER4|PTGIR	10558	SPTLC1	serine palmitoyltransferase long chain base subunit 1	pQSAR	0.8361	0.8813	0.8813	0.3933	0.5	0.5	0.9961	2	1	1	0	0	0	0	0	0	0.0056	N	0	TRUE	FALSE
BRD-K56957086	dacinostat	HDAC inhibitor, HDAC1|HDAC2|HDAC3|HDAC4|HDAC5|HDAC6|HDAC7|HDAC8|HDAC9	3065	HDAC1	histone deacetylase 1	Known	0.8951	0.8646	0.9412	0.6747	0.8518	0.5	0.9961	8	1	1	0	1	0	0	1	1	0.0014	Y	1	TRUE	TRUE
BRD-K59753853	MDL-29951	glutamate receptor antagonist|fructose biphosphate inhibitor|UDP/CysLT (GPR17, P2Y-like) Agonists, FBP1|GPR17	5163	PDK1	pyruvate dehydrogenase kinase 1	pQSAR	0.8599	0.875	0.875	0.15	0.5	0.5	0.9961	2	1	1	0	0	0	0	0	0	0.0034	N	0	TRUE	FALSE
BRD-K70487031	flupentixol	dopamine receptor antagonist, DRD2|DRD1|ADRA1A|CHRM1|DRD3|DRD5|HTR2A	3269	HRH1	histamine receptor H1	pIC50	0.5177	0.9217	0.9594	0.8499	0.5	0.5	0.9961	7	0	1	0	0	1	0	1	0	0.2762	N	0	FALSE	TRUE
BRD-K81091703	chlorprothixene	dopamine receptor|dopamine receptor antagonist, DRD2|CHRM1|CHRM2|CHRM3|CHRM4|CHRM5|DRD1|DRD3|HRH1|HTR2A|HTR2B|HTR2C	3269	HRH1	histamine receptor H1	Known	0.2317	0.9452	0.9766	0.9908	0.5	0.5	0.9961	8	0	1	0	0	1	1	0	1	0.922	Y	1	FALSE	TRUE
BRD-K83896451	glutamine	amino acid, CTPS1|GLUL|GPRC6A|PPAT	5604	MAP2K1	mitogen-activated protein kinase kinase 1	pQSAR	0.882	0.8681	0.8681	0.1202	0.5	0.5	0.9961	2	1	1	0	0	0	0	0	0	0.002	N	0	TRUE	FALSE
BRD-A04020513	l-buthionine-sulfoximine	Î³-glutamylcysteine synthetase inhibitor, GCLM	4313	MMP2	matrix metallopeptidase 2	pQSAR	0.8783	0.8687	0.8687	0.3149	0.5	0.5	0.996	2	1	1	0	0	0	0	0	0	0.0022	N	0	TRUE	FALSE
BRD-A07893380	vigabatrin	GABA aminotransferase inhibitor, ABAT|GABBR1|SLC32A1	18	ABAT	4-aminobutyrate aminotransferase	Known	0.5495	0.9179	0.9179	0.1989	0.5	0.5	0.996	8	0	1	0	0	0	0	0	1	0.2127	Y	1	FALSE	TRUE
BRD-A15079084	phorbol-12-myristate-13-acetate	PKC activator|CD antagonist, CD4|KCNT2|PRKCA|TRPV4	476	ATP1A1	ATPase Na+/K+ transporting subunit alpha 1	pQSAR	0.8654	0.8725	0.8725	0.146	0.5	0.5	0.996	2	1	1	0	0	0	0	0	0	0.003	N	0	TRUE	FALSE
BRD-A16444946	acarbose	glucosidase inhibitor, GAA|MGAM|AMY2A|SI	111	ADCY5	adenylate cyclase 5	pQSAR	0.9259	0.8492	0.8492	0.146	0.5	0.5	0.996	2	1	1	0	0	0	0	0	0	0.0005	N	0	TRUE	FALSE
BRD-A19195498	trimipramine	adrenergic transmitter uptake inhibitor|dopamine receptor|norepinephrine transporter inhibitor|serotonin transporter (SERT) inhibitor|serotonin uptake inhibitor|tricyclic antidepressant|tricyclic antidepressant (TCA), SLC6A2|SLC6A4|SLC6A3|ADRA1A|ADRA1B|ADRA2A|ADRA2B|ADRB1|ADRB2|ADRB3|CHRM1|CHRM2|CHRM3|CHRM4|CHRM5|DRD1|DRD2|DRD5|HRH1|HTR1A|HTR1D|HTR2A|HTR2C|HTR3A	3358	HTR2C	5-hydroxytryptamine receptor 2C	Known	0.2244	0.9452	0.953	0.7376	0.5	0.5	0.996	8	0	1	0	0	0	0	0	1	0.9297	Y	1	FALSE	TRUE
BRD-A19500257	geldanamycin	HSP inhibitor, HSP90AA1|HSP90AB1	3551	IKBKB	inhibitor of nuclear factor kappa B kinase subunit beta	pQSAR	0.8317	0.8813	0.8813	0.2419	0.5	0.6979	0.996	2	1	1	0	0	0	0	0	0	0.0061	N	0	TRUE	FALSE
BRD-A28970875	puromycin	adenosine receptor agonist|protein synthesis inhibitor, NHP2L1|RPL10L|RPL11|RPL13A|RPL15|RPL19|RPL23|RPL23A|RPL26L1|RPL3|RPL37|RPL8|RSL24D1	476	ATP1A1	ATPase Na+/K+ transporting subunit alpha 1	pQSAR	0.9259	0.8486	0.8486	0.1264	0.5	0.5	0.996	2	1	1	0	0	0	0	0	0	0.0005	N	0	TRUE	FALSE
BRD-A28970875	puromycin	adenosine receptor agonist|protein synthesis inhibitor, NHP2L1|RPL10L|RPL11|RPL13A|RPL15|RPL19|RPL23|RPL23A|RPL26L1|RPL3|RPL37|RPL8|RSL24D1	5970	RELA	RELA proto-oncogene, NF-kB subunit	pQSAR	0.8561	0.8752	0.8752	0.1733	0.5	0.5	0.996	2	1	1	0	0	0	0	0	0	0.0037	N	0	TRUE	FALSE
BRD-A30437061	camptothecin	topoisomerase inhibitor|beta amyloid synthesis inhibitor|hypoxia inducible factor inhibitor, TOP1|HIF1A	1025	CDK9	cyclin dependent kinase 9	pQSAR	0.8137	0.8849	0.8849	0.1881	0.5	0.6266	0.996	2	1	1	0	0	0	0	0	0	0.0085	N	0	TRUE	FALSE
BRD-A53131506	epitestosterone	inactive testosterone analog, AKR1C1|AKR1C2|AR	7421	VDR	vitamin D receptor	pQSAR	0.8111	0.8855	0.8855	0.5021	0.5	0.5	0.996	2	1	1	0	0	0	0	0	0	0.0089	N	0	TRUE	FALSE
BRD-A83081521	finasteride	5 alpha reductase inhibitor|androgen receptor antagonist|steroid 5alpha-reductase inhibitor, SRD5A2|SRD5A1|AKR1D1|AR	367	AR	androgen receptor	Known	0.5157	0.9215	0.9765	0.9908	0.5	0.5	0.996	8	0	1	0	0	1	1	0	1	0.2806	Y	1	FALSE	TRUE
BRD-K04196797	oxcarbazepine	voltage-gated sodium channel blocker|Sodium Channel Blockers, CYP2C19|CYP3A4|CYP3A5|SCN1A|SCN3A|SCN5A	1577	CYP3A5	cytochrome P450 family 3 subfamily A member 5	Known	0.9168	0.8538	0.8538	0.2823	0.5	0.5	0.996	8	1	1	0	0	0	0	0	1	0.0007	Y	1	TRUE	TRUE
BRD-K10481964	mestranol	estrogen receptor agonist, ESR1	367	AR	androgen receptor	pQSAR	0.8343	0.8802	0.8913	0.564	0.5	0.5	0.996	2	1	1	0	0	0	0	0	0	0.0058	N	0	TRUE	FALSE
BRD-K18757346	U-46619	thromboxane receptor agonist, PTGDR|PTGDR2|PTGER1|PTGER2|PTGER3|PTGER4|PTGFR|PTGIR|TBXA2R	5467	PPARD	peroxisome proliferator activated receptor delta	pQSAR	0.8715	0.8711	0.963	0.7262	0.5	0.5	0.996	2	1	1	0	0	0	0	0	0	0.0026	N	0	TRUE	FALSE
BRD-K24576554	AT-9283	Aurora kinase inhibitor|JAK inhibitor|Abl kinase inhibitor|Bcr-Abl kinase inhibitor|FLT3 inhibitor|mitotic inhibitor|protein kinase inhibitor, AURKA|AURKB|ABL1|BCR|FLT3|JAK2|JAK3|RPS6KA6|STK17A	3718	JAK3	Janus kinase 3	Known	0.946	0.836	0.836	0.1338	0.5	0.5	0.996	8	1	1	0	0	0	0	1	1	0.0002	Y	1	TRUE	TRUE
BRD-K33106058	cytarabine	antimetabolite|DNA polymerase inhibitor|DNA synthesis inhibitor|ribonucleotide reductase inhibitor, POLB|POLA1	7298	TYMS	thymidylate synthetase	NCI60	0.7811	0.8912	0.9401	0.7806	0.5	0.8022	0.996	3	0	1	1	0	0	0	0	0	0.0146	N	0	FALSE	TRUE
BRD-K37846922	3,3'-diindolylmethane	androgen receptor antagonist|aryl hydrocarbon receptor agonist|beta glucuronidase inhibitor|CHK inhibitor|cytochrome P450 activator|indoleamine 2,3-dioxygenase inhibitor, AHR|AR|CYP1A2|GUSB|IDO1	1131	CHRM3	cholinergic receptor muscarinic 3	pQSAR	0.8599	0.8737	0.8737	0.3613	0.5	0.354	0.996	2	1	1	0	0	0	0	0	0	0.0034	N	0	TRUE	FALSE
BRD-K37865504	LY-2183240	FAAH inhibitor|FAAH reuptake inhibitor, FAAH	217	ALDH2	aldehyde dehydrogenase 2 family member	pQSAR	0.9062	0.8578	0.8578	0.1264	0.5	0.5	0.996	2	1	1	0	0	0	0	0	0	0.001	N	0	TRUE	FALSE
BRD-K41494493	bisphenol-a	synthetic compound with hormone-like properties, AR|ESR2|ESRRG|PPARG	3776	KCNK2	potassium two pore domain channel subfamily K member 2	pQSAR	0.8801	0.8682	0.8682	0.1071	0.5	0.5	0.996	2	1	1	0	0	0	0	0	0	0.0021	N	0	TRUE	FALSE
BRD-K50140147	NVP-TAE684	ALK tyrosine kinase receptor inhibitor|ALK tyrosine kinase receptor mutant inhibitor|leucine rich repeat kinase inhibitor, ALK|INSR	2185	PTK2B	protein tyrosine kinase 2 beta	pQSAR	0.8164	0.8845	0.8845	0.2419	0.5	0.5	0.996	2	1	1	0	0	0	0	0	0	0.0081	N	0	TRUE	FALSE
BRD-K53857191	risperidone	dopamine receptor antagonist|serotonin receptor antagonist|adrenergic receptor antagonist, DRD2|HTR2A|ADRA1A|ADRA1B|DRD3|HRH1|HTR1A|HTR1D|HTR2C|ADRA1D|ADRA2A|ADRA2B|ADRA2C|CYP3A5|DRD1|DRD4|HTR1B|HTR1E|HTR1F|HTR6|HTR7	2554	GABRA1	gamma-aminobutyric acid type A receptor subunit alpha1	pQSAR	0.9095	0.8568	0.8568	0.1881	0.5	0.5	0.996	2	1	1	0	0	0	0	0	0	0.0009	N	0	TRUE	FALSE
BRD-K61250553	loperamide	opioid receptor agonist|atrial natriuretic peptide receptor antagonist, OPRM1|OPRD1|CACNA1A|CALM1|CYP2B6|CYP2C8|NPR2|OPRK1|POMC	1577	CYP3A5	cytochrome P450 family 3 subfamily A member 5	pQSAR	0.8654	0.8726	0.8726	0.3613	0.5	0.5	0.996	2	1	1	0	0	0	0	0	0	0.003	N	0	TRUE	FALSE
BRD-K64052750	gefitinib	EGFR inhibitor, EGFR|CYP2C19	1577	CYP3A5	cytochrome P450 family 3 subfamily A member 5	pQSAR	0.8654	0.8729	0.8729	0.5021	0.5	0.7638	0.996	2	1	1	0	0	0	0	0	0	0.003	N	0	TRUE	FALSE
BRD-K72029282	probucol	atherogenesis inhibitor|cholesterol inhibitor|reducing agent, ABCA1|ABCB11|CES1	142	PARP1	poly(ADP-ribose) polymerase 1	pQSAR	0.9378	0.8411	0.8411	0.1128	0.5	0.392	0.996	2	1	1	0	0	0	0	0	0	0.0003	N	0	TRUE	FALSE
BRD-K91263825	nortriptyline	PI3K inhibitor|potassium channel blocker|tricyclic antidepressant (TCA), KCNJ10|SLC6A2|SLC6A4|ADRA1A|ADRA1B|ADRA1D|ADRA2A|ADRA2B|ADRA2C|ADRB1|ADRB2|ADRB3|CHRM1|CHRM2|CHRM3|CHRM4|CHRM5|CYP2C19|DRD2|HRH1|HTR1A|HTR2A|HTR2C|HTR6|PGRMC1|PIK3CD|SIGMAR1	152	ADRA2C	adrenoceptor alpha 2C	Known	0.39	0.9316	0.9481	0.6079	0.5	0.5	0.996	8	0	1	0	0	0	0	1	1	0.6078	Y	1	FALSE	TRUE
BRD-K95655893	MAZ-51	VEGFR inhibitor, FLT4	595	CCND1	cyclin D1	pQSAR	0.8438	0.8778	0.8778	0.5504	0.5	0.5	0.996	2	1	1	0	0	0	0	0	0	0.0048	N	0	TRUE	FALSE
BRD-A17819071	gedunin	HSP inhibitor, HSP90AA1	2554	GABRA1	gamma-aminobutyric acid type A receptor subunit alpha1	pQSAR	0.8276	0.881	0.881	0.1338	0.5	0.5	0.9959	2	1	1	0	0	0	0	0	0	0.0066	N	0	TRUE	FALSE
BRD-A23359898	sibutramine	serotonin reuptake inhibitor|adrenergic transmitter uptake inhibitor|dopamine reuptake inhibitor|norepinephrine reuptake inhibitor|norepinephrine transporter inhibitor|serotonin uptake inhibitor, SLC6A2|SLC6A4|SLC6A3|CYP2B6|CYP2C19|CYP3A5	154	ADRB2	adrenoceptor beta 2	pQSAR	0.838	0.8789	0.8789	0.2931	0.5	0.5	0.9959	2	1	1	0	0	0	0	0	0	0.0054	N	0	TRUE	FALSE
BRD-A54487287	cortisone	glucocorticoid receptor agonist, NR3C1	6608	SMO	smoothened, frizzled class receptor	pQSAR	0.8459	0.8767	0.8767	0.2823	0.5	0.5	0.9959	2	1	1	0	0	0	0	0	0	0.0046	N	0	TRUE	FALSE
BRD-A56518012	epirubicin	topoisomerase inhibitor|DNA intercalating drug|DNA synthesis inhibitor|radical formation stimulant|RNA synthesis inhibitor, TOP2A|CHD1	7153	TOP2A	DNA topoisomerase II alpha	Known	0.7053	0.9013	0.977	0.9908	0.2327	0.8919	0.9959	8	0	1	1	0	1	1	0	1	0.0418	Y	1	FALSE	TRUE
BRD-A59215453	lobelanidine	acetylcholine receptor antagonist|dopamine receptor modulator|opioid receptor antagonist|vesicular monoamine transporter ligand, SLC18A2|CHRNA10|CHRNA4|CHRNA9|CHRNB2|OPRM1	801	CALM1	calmodulin 1	pQSAR	0.8317	0.8796	0.8796	0.3039	0.5	0.5	0.9959	2	1	1	0	0	0	0	0	0	0.0061	N	0	TRUE	FALSE
BRD-K01095011	finasteride	5 alpha reductase inhibitor|androgen receptor antagonist|steroid 5alpha-reductase inhibitor, SRD5A2|SRD5A1|AKR1D1|AR	1131	CHRM3	cholinergic receptor muscarinic 3	pQSAR	0.8428	0.877	0.877	0.3497	0.5	0.5	0.9959	2	1	1	0	0	0	0	0	0	0.0049	N	0	TRUE	FALSE
BRD-K01493881	apigenin	casein kinase inhibitor|cell proliferation inhibitor|cytochrome P450 inhibitor|GABA receptor antagonist|glutamate receptor antagonist|monoamine oxidase inhibitor|nitric oxide production inhibitor|ornithine decarboxylase inhibitor|quorum sensing signaling modulator|VEGF expression inhibitor|xanthine oxidase inhibitor, AKR1B1|AR|CDK6|CFTR|CYP19A1|CYP1A2|CYP1B1|HSD17B1|MAOA|ODC1|XDH	7124	TNF	tumor necrosis factor	pQSAR	0.9259	0.8477	0.8477	0.5165	0.5	0.5	0.9959	2	1	1	0	0	0	0	0	0	0.0005	N	0	TRUE	FALSE
BRD-K17084514	diethylstilbestrol	estrogen receptor agonist|chloride channel blocker, ESR1|ESR2|ESRRG|ESRRB	4128	MAOA	monoamine oxidase A	pQSAR	0.8491	0.8762	0.8762	0.3933	0.5	0.5	0.9959	2	1	1	0	0	0	0	0	0	0.0043	N	0	TRUE	FALSE
BRD-K18194590	mephentermine	adrenergic receptor agonist, ADRA1A|ADRA1B|ADRA1D|ADRA2A|ADRA2B|ADRA2C|ADRB1|ADRB2|ADRB3	152	ADRA2C	adrenoceptor alpha 2C	Known	0.5152	0.9207	0.9207	0.9908	0.5	0.5	0.9959	8	0	1	0	0	1	1	0	1	0.2816	Y	1	FALSE	TRUE
BRD-K20313525	rosmarinic-acid	antioxidant, MCL1|TYR	5579	PRKCB	protein kinase C beta	pQSAR	0.9003	0.8596	0.9085	0.7128	0.5	0.5	0.9959	2	1	1	0	0	0	0	0	0	0.0012	N	0	TRUE	FALSE
BRD-K24844714	fluorouracil	dihydropyrimidine dehydrogenase inhibitor|pyrimidine antagonist|RNA synthesis inhibitor|thymidylate synthase inhibitor, DPYD|TYMS|CD44	7298	TYMS	thymidylate synthetase	Known	0.7507	0.895	0.895	0.4165	0.5	0.8258	0.9959	8	0	1	1	0	0	0	0	1	0.0229	Y	1	FALSE	TRUE
BRD-K27062708	chlorotrianisene	estrogen receptor agonist, ESR1	2099	ESR1	estrogen receptor 1	Known	0.6765	0.9043	0.9043	0.6677	0.5	0.5	0.9959	8	0	1	0	0	0	0	1	1	0.0591	Y	1	FALSE	TRUE
BRD-K28307902	flutamide	androgen receptor antagonist, AR|AHR|CYP2C19	367	AR	androgen receptor	Known	0.7229	0.8984	0.8984	0.6843	0.5	0.5	0.9959	8	0	1	0	0	0	0	0	1	0.0334	Y	1	FALSE	TRUE
BRD-K28687144	fosfosal	phosphodiesterase inhibitor, PDE4A|PDE4B|PDE4C|PDE4D|PTGS1|PTGS2	5743	PTGS2	prostaglandin-endoperoxide synthase 2	Known	0.7551	0.8943	0.9304	0.7071	0.5	0.5	0.9959	8	0	1	0	0	0	0	0	1	0.0215	Y	1	FALSE	TRUE
BRD-K35240538	methylprednisolone	glucocorticoid receptor agonist, NR3C1	1131	CHRM3	cholinergic receptor muscarinic 3	pQSAR	0.8104	0.8846	0.8846	0.1531	0.5	0.5586	0.9959	2	1	1	0	0	0	0	0	0	0.009	N	0	TRUE	FALSE
BRD-K39965020	doconexent	PPAR receptor agonist|unidentified pharmacological activity, FFAR1|PPARA|PTGS1|PTGS2	5465	PPARA	peroxisome proliferator activated receptor alpha	Known	0.2624	0.9416	0.9416	0.468	0.5	0.5	0.9959	8	0	1	0	0	0	0	0	1	0.8833	Y	1	FALSE	TRUE
BRD-K48578705	methyldopa	adrenergic receptor agonist, DDC|ADRA2A	150	ADRA2A	adrenoceptor alpha 2A	Known	0.6056	0.9125	0.9125	0.4608	0.5	0.5	0.9959	8	0	1	0	0	0	0	0	1	0.1265	Y	1	FALSE	TRUE
BRD-K60762818	desipramine	norepinephrine transporter inhibitor|Sodium Channel Blockers|tricyclic antidepressant (TCA), SLC6A2|SLC6A4|ADRA1A|ADRA1B|ADRA1D|ADRA2A|ADRA2B|ADRA2C|ADRB1|ADRB2|CHRM1|CHRM2|CHRM3|CHRM4|CHRM5|DRD2|HRH1|HTR1A|HTR2A|HTR2C|SMPD1	154	ADRB2	adrenoceptor beta 2	Known	0.2741	0.9403	0.9488	0.6163	0.5	0.5	0.9959	8	0	1	0	0	0	0	0	1	0.8655	Y	1	FALSE	TRUE
BRD-K62858456	lomerizine	calcium channel antagonist|calcium channel blocker|P glycoprotein inhibitor, ABCB1|CACNA1B|SCN5A	1128	CHRM1	cholinergic receptor muscarinic 1	pIC50	0.8049	0.8853	0.8853	0.4895	0.5	0.5	0.9959	7	1	1	0	0	0	0	1	0	0.0099	N	0	TRUE	TRUE
BRD-K68202742	trichostatin-a	HDAC inhibitor|CDK expression enhancer|ID1 expression inhibitor, HDAC7|HDAC8|HDAC1|HDAC10|HDAC2|HDAC3|HDAC4|HDAC5|HDAC6|HDAC9	55869	HDAC8	histone deacetylase 8	Known	0.8502	0.8758	0.9741	0.9908	0.5	0.8919	0.9959	8	1	1	1	0	1	1	1	1	0.0042	Y	1	TRUE	TRUE
BRD-K71350836	butalbital	barbiturate, binds to the GABA receptor and enhances the inhibitory effect of GABA, GABRA1|CHRNA4|CHRNA7|GABRA2|GABRA3|GABRA4|GABRA5|GABRA6|GABRB1|GABRB2|GABRB3|GABRD|GABRE|GABRG1|GABRG2|GABRG3|GABRP|GABRQ|GRIA2|GRIK2	95	ACY1	aminoacylase 1	pQSAR	0.8086	0.8852	0.8852	0.1338	0.5	0.5	0.9959	2	1	1	0	0	0	0	0	0	0.0093	N	0	TRUE	FALSE
BRD-K72029282	probucol	atherogenesis inhibitor|cholesterol inhibitor|reducing agent, ABCA1|ABCB11|CES1	5579	PRKCB	protein kinase C beta	pQSAR	0.8361	0.8792	0.8792	0.1379	0.5	0.6029	0.9959	2	1	1	0	0	0	0	0	0	0.0056	N	0	TRUE	FALSE
BRD-K84175871	pseudoephedrine	histamine receptor antagonist|interleukin expression inhibitor|tumor necrosis factor expression inhibitor, ADRA1A|ADRA2A|ADRB1|ADRB2|ATF1|ATF2|ATF3|ATF4|ATF5|ATF6|ATF7|CXCL8|FOS|HRH1|IL2|JDP2|JUN|NFATC1|SLC6A2|SLC6A3|SLC6A4|TNF	3269	HRH1	histamine receptor H1	Known	0.6807	0.904	0.904	0.3265	0.5	0.5	0.9959	8	0	1	0	0	0	0	0	1	0.0563	Y	1	FALSE	TRUE
BRD-K86930074	cediranib	VEGFR inhibitor|KIT inhibitor|angiogenesis inhibitor|VEGFR antagonist, KDR|FLT1|FLT4|KIT|PDGFRB|CSF1R|FLT3|PDGFRA	6714	SRC	SRC proto-oncogene, non-receptor tyrosine kinase	pQSAR	0.8684	0.8709	0.9081	0.5947	0.5	0.5	0.9959	2	1	1	0	0	0	0	0	0	0.0028	N	0	TRUE	FALSE
BRD-K95391106	prednicarbate	corticosteroid agonist|immunosuppressant|phospholipase activator, NR3C1|PLA2G1B	1131	CHRM3	cholinergic receptor muscarinic 3	pQSAR	0.8361	0.8794	0.8794	0.1338	0.5	0.5	0.9959	2	1	1	0	0	0	0	0	0	0.0056	N	0	TRUE	FALSE
BRD-K96799727	pifithrin-mu	HSP inhibitor, HSPA1A|TP53	231	AKR1B1	aldo-keto reductase family 1 member B	pQSAR	0.884	0.8655	0.8655	0.1419	0.5	0.5	0.9959	2	1	1	0	0	0	0	0	0	0.0019	N	0	TRUE	FALSE
BRD-A16311756	profenamine	butyrylcholinesterase inhibitors|cholinergic receptor antagonist|glutamate receptor antagonist, CHRM1|BCHE|CHRM2|GRIN3A	1577	CYP3A5	cytochrome P450 family 3 subfamily A member 5	pQSAR	0.9259	0.8458	0.8458	0.3265	0.5	0.5	0.9958	2	1	1	0	0	0	0	0	0	0.0005	N	0	TRUE	FALSE
BRD-A17655518	ibuprofen	cyclooxygenase inhibitor|NFkB pathway inhibitor, PTGS2|PTGS1|ASIC1|BCL2|CFTR|CYP2C8|FABP2|PLAT|PPARG|SLC5A8|THBD	468	ATF4	activating transcription factor 4	pQSAR	0.8317	0.8785	0.8785	0.15	0.5	0.5	0.9958	2	1	1	0	0	0	0	0	0	0.0061	N	0	TRUE	FALSE
BRD-A19037878	trichostatin-a	HDAC inhibitor|CDK expression enhancer|ID1 expression inhibitor, HDAC7|HDAC8|HDAC1|HDAC10|HDAC2|HDAC3|HDAC4|HDAC5|HDAC6|HDAC9	3065	HDAC1	histone deacetylase 1	Known	0.8881	0.8625	0.9741	0.9908	0.5	0.8919	0.9958	8	1	1	1	0	1	1	1	1	0.0017	Y	1	TRUE	TRUE
BRD-A92439610	triamcinolone	antiinflammatory agent|corticosteroid agonist|corticosteroid binding globulin binder|corticosteroid hormone receptor agonist|cytochrome P450 inhibitor|glucocorticoid receptor agonist|immunosuppressant|immunosuppressive agent, NR3C1|CYP3A5|CYP3A7|SERPINA6	1577	CYP3A5	cytochrome P450 family 3 subfamily A member 5	Known	0.497	0.9214	0.9612	0.9908	0.5	0.5	0.9958	8	0	1	0	0	1	1	0	1	0.3232	Y	1	FALSE	TRUE
BRD-A97701745	pindolol	adrenergic receptor antagonist, ADRB1|ADRB2|HTR1A|HTR1B|HTR2A|HTR2B	154	ADRB2	adrenoceptor beta 2	Known	0.9259	0.8463	0.9372	0.7888	0.5	0.5	0.9958	8	1	1	0	0	0	0	0	1	0.0005	Y	1	TRUE	TRUE
BRD-K02708799	GSK-1059615	PI3K inhibitor|mTOR inhibitor, PIK3CA|PIK3CG	2475	MTOR	mechanistic target of rapamycin kinase	pIC50	0.9259	0.8464	0.8464	0.1989	0.5	0.5	0.9958	7	1	1	0	0	0	0	1	0	0.0005	N	0	TRUE	TRUE
BRD-K06335600	tizanidine	adrenergic receptor agonist, ADRA2A|ADRA2B|ADRA2C|CYP1A2|NISCH	152	ADRA2C	adrenoceptor alpha 2C	Known	0.4829	0.9228	0.9228	0.5452	0.5	0.5	0.9958	8	0	1	0	0	0	0	0	1	0.3573	Y	1	FALSE	TRUE
BRD-K08799216	pelitinib	EGFR inhibitor|tyrosine kinase inhibitor, EGFR|ERBB2	2064	ERBB2	erb-b2 receptor tyrosine kinase 2	Known	0.8236	0.881	0.9528	0.9001	0.5	0.5	0.9958	8	1	1	0	0	1	0	0	1	0.0071	Y	1	TRUE	TRUE
BRD-K09436313	prostaglandin	prostanoid receptor antagonist, AKR1C3|PTGDR|PTGDR2|PTGER1|PTGER2|PTGER4|PTGFR	5734	PTGER4	prostaglandin E receptor 4	Known	0.5236	0.9188	0.9625	0.8699	0.5	0.5	0.9958	8	0	1	0	0	1	0	0	1	0.2636	Y	1	FALSE	TRUE
BRD-K23913458	coumarin	vitamin antagonist, CA1|CA12|CA14|CA2|CA4|CA6|CA9|CYP2A6	771	CA12	carbonic anhydrase 12	Known	0.4706	0.9237	0.9334	0.7635	0.5	0.5	0.9958	8	0	1	0	0	0	0	0	1	0.3885	Y	1	FALSE	TRUE
BRD-K24576554	AT-9283	Aurora kinase inhibitor|JAK inhibitor|Abl kinase inhibitor|Bcr-Abl kinase inhibitor|FLT3 inhibitor|mitotic inhibitor|protein kinase inhibitor, AURKA|AURKB|ABL1|BCR|FLT3|JAK2|JAK3|RPS6KA6|STK17A	1017	CDK2	cyclin dependent kinase 2	pQSAR	0.8014	0.8851	0.8851	0.538	0.5596	0.5	0.9958	2	1	1	0	0	0	0	0	0	0.0105	N	0	TRUE	FALSE
BRD-K26521938	dinoprostone	prostanoid receptor agonist, PTGER2|PTGER1|PTGER3|PTGER4|CATSPER1|CATSPER2|CATSPER3|CATSPER4|PTGDR|PTGDR2|PTGFR|TBXA2R	5737	PTGFR	prostaglandin F receptor	Known	0.5496	0.9164	0.9625	0.8699	0.5	0.5	0.9958	8	0	1	0	0	1	0	0	1	0.2125	Y	1	FALSE	TRUE
BRD-K46211610	tolazoline	adrenergic receptor antagonist, ADRA2A|ADRA2B|ADRA2C|ADRA1A|HRH1|HRH2	150	ADRA2A	adrenoceptor alpha 2A	Known	0.4955	0.9216	0.9259	0.7376	0.5	0.5	0.9958	8	0	1	0	0	0	0	0	1	0.3266	Y	1	FALSE	TRUE
BRD-K51290057	SA-792709	retinoid receptor agonist, RARA|RARB	3091	HIF1A	hypoxia inducible factor 1 subunit alpha	pQSAR	0.8669	0.8694	0.8694	0.4514	0.5	0.5	0.9958	2	1	1	0	0	0	0	0	0	0.0029	N	0	TRUE	FALSE
BRD-K60762818	desipramine	norepinephrine transporter inhibitor|Sodium Channel Blockers|tricyclic antidepressant (TCA), SLC6A2|SLC6A4|ADRA1A|ADRA1B|ADRA1D|ADRA2A|ADRA2B|ADRA2C|ADRB1|ADRB2|CHRM1|CHRM2|CHRM3|CHRM4|CHRM5|DRD2|HRH1|HTR1A|HTR2A|HTR2C|SMPD1	3358	HTR2C	5-hydroxytryptamine receptor 2C	Known	0.218	0.9449	0.9609	0.7724	0.5	0.5	0.9958	8	0	1	0	0	0	0	0	1	0.936	Y	1	FALSE	TRUE
BRD-K70504303	prednisolone	glucocorticoid receptor agonist, NR3C1|NR3C2|SERPINA6	301	ANXA1	annexin A1	StructureLikely	0.465	0.9239	0.966	0.8017	0.5	0.5	0.9958	5	0	1	0	0	1	0	0	0	0.4031	N	0	FALSE	TRUE
BRD-K71499074	diclofenamide	carbonic anhydrase inhibitor, CA1|CA2|CA4|CA12|CA7	771	CA12	carbonic anhydrase 12	Known	0.4084	0.9286	0.9286	0.6205	0.5	0.5	0.9958	8	0	1	0	0	0	0	0	1	0.5573	Y	1	FALSE	TRUE
BRD-K73397362	purmorphamine	smoothened receptor agonist, SMO|DHH|IHH|PTCH1	1956	EGFR	epidermal growth factor receptor	pQSAR	0.8927	0.8615	0.8615	0.3039	0.5	0.5	0.9958	2	1	1	0	0	0	0	0	0	0.0015	N	0	TRUE	FALSE
BRD-K85503079	perospirone	dopamine receptor antagonist|serotonin receptor antagonist, DRD2|HTR2A|DRD3|DRD4|HTR2C	3358	HTR2C	5-hydroxytryptamine receptor 2C	Known	0.6675	0.9045	0.9266	0.6571	0.5	0.5	0.9958	8	0	1	0	0	0	0	0	1	0.0656	Y	1	FALSE	TRUE
BRD-K87909389	alvocidib	CDK inhibitor|apoptosis stimulant|BCL inhibitor|cell cycle inhibitor|MCL1 inhibitor|survivin inhibitor|XIAP inhibitor, CDK2|CDK4|CDK1|CDK6|CDK7|CDK9|CDK5|CDK8|EGFR|PYGM|BCL2|BIRC5|CCNT1|MCL1|XIAP	3091	HIF1A	hypoxia inducible factor 1 subunit alpha	pQSAR	0.8428	0.8767	0.8767	0.3933	0.6721	0.6266	0.9958	2	1	1	0	0	0	0	0	0	0.0049	N	0	TRUE	FALSE
BRD-A40639672	ketorolac	cyclooxygenase inhibitor, PTGS1|PTGS2	5743	PTGS2	prostaglandin-endoperoxide synthase 2	Known	0.7856	0.8872	0.8872	0.5947	0.5	0.5	0.9957	8	0	1	0	0	0	0	1	1	0.0136	Y	1	FALSE	TRUE
BRD-A52934756	15-delta-prostaglandin-j2	PPAR receptor agonist|FXR antagonist, PPARG|NR1H4	5468	PPARG	peroxisome proliferator activated receptor gamma	Known	0.5493	0.9164	0.9771	0.9908	0.5	0.5	0.9957	8	0	1	0	0	1	1	0	1	0.2129	Y	1	FALSE	TRUE
BRD-K10843433	phenylbutazone	cyclooxygenase inhibitor|platelet aggregation inhibitor|prostanoid receptor inhibitor, PTGS2|PTGS1|PTGIS	154	ADRB2	adrenoceptor beta 2	pQSAR	0.8014	0.8841	0.8841	0.3149	0.5	0.5	0.9957	2	1	1	0	0	0	0	0	0	0.0105	N	0	TRUE	FALSE
BRD-K14791739	fluticasone	glucocorticoid receptor agonist, NR3C1|CYP3A5|CYP3A7|NR3C2|PGR|PLA2G4A	1577	CYP3A5	cytochrome P450 family 3 subfamily A member 5	Known	0.5416	0.917	0.9755	0.9908	0.5	0.5	0.9957	8	0	1	0	0	1	1	0	1	0.2274	Y	1	FALSE	TRUE
BRD-K20285085	fostamatinib	syk inhibitor|FLT3 inhibitor, SYK|FLT3|RET	9212	AURKB	aurora kinase B	pQSAR	0.8343	0.8772	0.8772	0.2419	0.5	0.5	0.9957	2	1	1	0	0	0	0	0	0	0.0058	N	0	TRUE	FALSE
BRD-K21680192	mitoxantrone	topoisomerase inhibitor|DNA intercalating drug|HCV inhibitor|immunosuppressant|Pim kinase inhibitor, TOP2A|PIM1	599	BCL2L2	BCL2 like 2	pQSAR	0.8199	0.8802	0.8802	0.1096	0.5	0.3914	0.9957	2	1	1	0	0	0	0	0	0	0.0076	N	0	TRUE	FALSE
BRD-K28470988	L-690330	inositol monophophatase inhibitor, IMPA1	1956	EGFR	epidermal growth factor receptor	pQSAR	0.8669	0.8685	0.8685	0.1989	0.5	0.5	0.9957	2	1	1	0	0	0	0	0	0	0.0029	N	0	TRUE	FALSE
BRD-K30466858	ellagic-acid	aldose reductase inhibitor|beta-secretase inhibitor|glutathione transferase inhibitor|HCV inhibitor|HIV integrase inhibitor|quorum sensing signaling modulator|reverse transcriptase inhibitor, CA1|CA12|CA14|CA2|CA4|CA6|CA9|SYK|AKR1B1|BACE1|CA3|CA5A|CA5B|CA7|CSNK2A1|GSK3B|PRKACA|PRKCA|PRKCB|SQLE	771	CA12	carbonic anhydrase 12	Known	0.4347	0.9259	0.9406	0.581	0.5	0.3243	0.9957	8	0	1	0	0	0	0	0	1	0.4846	Y	1	FALSE	TRUE
BRD-K40476324	digoxin	ATPase inhibitor|ROR antagonist, ATP1A1|ABCB1|RORC|SLCO1B3	5243	ABCB1	ATP binding cassette subfamily B member 1	Known	0.8199	0.8802	0.8802	0.9908	0.5	0.8919	0.9957	8	1	1	1	0	1	1	0	1	0.0076	Y	1	TRUE	TRUE
BRD-K43764301	dexketoprofen	cyclooxygenase inhibitor, CXCR1|PTGS1|PTGS2|SLC5A8	3065	HDAC1	histone deacetylase 1	pQSAR	0.8599	0.8705	0.8705	0.3265	0.5	0.5	0.9957	2	1	1	0	0	0	0	0	0	0.0034	N	0	TRUE	FALSE
BRD-K44779798	miglitol	glucosidase inhibitor|sodium/glucose cotransporter activator, GAA|MGAM|GANAB|GANC|SLC5A4	5291	PIK3CB	phosphatidylinositol-4,5-bisphosphate 3-kinase catalytic subunit beta	pQSAR	0.946	0.8309	0.8309	0.1062	0.5	0.5	0.9957	2	1	1	0	0	0	0	0	0	0.0002	N	0	TRUE	FALSE
BRD-K45401373	betulinic-acid	apoptosis stimulant|caspase activator|diacylglycerol O acyltransferase inhibitor|HIV integrase inhibitor|NFkB pathway activator|NFKB pathway inhibitor|SARS coronavirus 3C-like protease inhibitor|topoisomerase inhibitor, CASP3|CASP8|GPBAR1|TOP1	1577	CYP3A5	cytochrome P450 family 3 subfamily A member 5	pQSAR	0.8699	0.8677	0.8677	0.2608	0.5	0.5	0.9957	2	1	1	0	0	0	0	0	0	0.0027	N	0	TRUE	FALSE
BRD-K47029922	tranylcypromine	cytochrome P450 inhibitor|histone lysine demethylase inhibitor|monoamine oxidase inhibitor, MAOA|MAOB|KDM1A|CYP2A6	1374	CPT1A	carnitine palmitoyltransferase 1A	pQSAR	0.8199	0.8802	0.8802	0.1096	0.5	0.5	0.9957	2	1	1	0	0	0	0	0	0	0.0076	N	0	TRUE	FALSE
BRD-K49685476	TTNPB	RAR agonist|retinoid receptor agonist, RARB|RARA|RARG	5915	RARB	retinoic acid receptor beta	Known	0.8043	0.8838	0.9747	0.9908	0.5	0.5	0.9957	8	1	1	0	0	1	1	0	1	0.01	Y	1	TRUE	TRUE
BRD-K63265447	docetaxel	tubulin inhibitor|microtubule depolymerization inhibitor|microtubule stabilizing agent|microtubule stimulant|taxane, TUBB|BCL2|MAP2|MAP4|MAPT|NR1I2|TUBB1	3091	HIF1A	hypoxia inducible factor 1 subunit alpha	pQSAR	0.9259	0.8447	0.8447	0.1217	0.5758	0.5	0.9957	2	1	1	0	0	0	0	0	0	0.0005	N	0	TRUE	FALSE
BRD-K63265447	docetaxel	tubulin inhibitor|microtubule depolymerization inhibitor|microtubule stabilizing agent|microtubule stimulant|taxane, TUBB|BCL2|MAP2|MAP4|MAPT|NR1I2|TUBB1	3725	JUN	Jun proto-oncogene, AP-1 transcription factor subunit	pQSAR	0.8613	0.8709	0.8709	0.1264	0.5	0.5	0.9957	2	1	1	0	0	0	0	0	0	0.0033	N	0	TRUE	FALSE
BRD-K69650333	idarubicin	topoisomerase inhibitor|radical formation stimulant|RNA synthesis inhibitor, TOP2A	1025	CDK9	cyclin dependent kinase 9	pQSAR	0.8525	0.8733	0.8733	0.1611	0.5	0.5	0.9957	2	1	1	0	0	0	0	0	0	0.004	N	0	TRUE	FALSE
BRD-K70778732	trazodone	adrenergic receptor antagonist|serotonin receptor antagonist|serotonin reuptake inhibitor|histamine receptor antagonist|serotonin uptake inhibitor, HTR2A|HTR2C|SLC6A4|ADRA1A|ADRA2A|HRH1|HTR1A|HTR2B	3269	HRH1	histamine receptor H1	Known	0.5952	0.9116	0.9116	0.3613	0.5	0.5	0.9957	8	0	1	0	0	0	0	1	1	0.1401	Y	1	FALSE	TRUE
BRD-K72420232	WZ-4002	EGFR inhibitor, EGFR|ERBB2	5979	RET	ret proto-oncogene	pQSAR	0.8221	0.8801	0.8801	0.4967	0.5	0.5	0.9957	2	1	1	0	0	0	0	0	0	0.0073	N	0	TRUE	FALSE
BRD-K81418486	vorinostat	HDAC inhibitor|cell cycle inhibitor, HDAC1|HDAC2|HDAC3|HDAC6|HDAC8|HDAC10|HDAC11|HDAC5|HDAC9	9734	HDAC9	histone deacetylase 9	Known	0.3989	0.9289	0.9289	0.6489	0.8192	0.7087	0.9957	8	0	1	0	1	0	0	0	1	0.5836	Y	1	FALSE	TRUE
BRD-K83597974	pargyline	monoamine oxidase inhibitor, MAOB|MAOA	1577	CYP3A5	cytochrome P450 family 3 subfamily A member 5	pQSAR	0.8599	0.8711	0.8711	0.2931	0.5	0.5	0.9957	2	1	1	0	0	0	0	0	0	0.0034	N	0	TRUE	FALSE
BRD-K87909389	alvocidib	CDK inhibitor|apoptosis stimulant|BCL inhibitor|cell cycle inhibitor|MCL1 inhibitor|survivin inhibitor|XIAP inhibitor, CDK2|CDK4|CDK1|CDK6|CDK7|CDK9|CDK5|CDK8|EGFR|PYGM|BCL2|BIRC5|CCNT1|MCL1|XIAP	7153	TOP2A	DNA topoisomerase II alpha	pQSAR	0.8525	0.8733	0.8733	0.2312	0.3946	0.6324	0.9957	2	1	1	0	0	0	0	0	0	0.004	N	0	TRUE	FALSE
BRD-K95237249	probenecid	MRP inhibitor|TRPV agonist|uricosuric blocker, SLC22A6|ABCC1|PANX1|SLC22A11|SLC22A8|SLCO1C1|TRPV2	1503	CTPS1	CTP synthase 1	pQSAR	0.8229	0.8798	0.8798	0.1217	0.5	0.5	0.9957	2	1	1	0	0	0	0	0	0	0.0072	N	0	TRUE	FALSE
BRD-A19195498	trimipramine	adrenergic transmitter uptake inhibitor|dopamine receptor|norepinephrine transporter inhibitor|serotonin transporter (SERT) inhibitor|serotonin uptake inhibitor|tricyclic antidepressant|tricyclic antidepressant (TCA), SLC6A2|SLC6A4|SLC6A3|ADRA1A|ADRA1B|ADRA2A|ADRA2B|ADRB1|ADRB2|ADRB3|CHRM1|CHRM2|CHRM3|CHRM4|CHRM5|DRD1|DRD2|DRD5|HRH1|HTR1A|HTR1D|HTR2A|HTR2C|HTR3A	5144	PDE4D	phosphodiesterase 4D	pQSAR	0.8613	0.8694	0.8694	0.146	0.5	0.5	0.9956	2	1	1	0	0	0	0	0	0	0.0033	N	0	TRUE	FALSE
BRD-A47144777	dihydro-7-desacetyldeoxygedunin	HSP90 inhibitor, HSP90AA1	3320	HSP90AA1	heat shock protein 90 alpha family class A member 1	Known	0.4935	0.9206	0.9206	0.4967	0.5	0.5	0.9956	8	0	1	0	0	0	0	0	1	0.3315	Y	1	FALSE	TRUE
BRD-A65449987	flunisolide	cytochrome P450 inhibitor|corticosteroid agonist|corticosteroid hormone receptor agonist|glucocorticoid receptor agonist|immunosuppressant, NR3C1	476	ATP1A1	ATPase Na+/K+ transporting subunit alpha 1	pQSAR	0.8669	0.8681	0.8681	0.3149	0.5	0.5	0.9956	2	1	1	0	0	0	0	0	0	0.0029	N	0	TRUE	FALSE
BRD-A94669766	naringenin	aromatase inhibitor|estrogen receptor agonist|quorum sensing signaling modulator|TRPM3 antagonist, CYP19A1|ESR2|CYP1B1|GLO1|HSD17B1	367	AR	androgen receptor	StructureSure	0.4488	0.9241	0.9241	0.9516	0.5	0.5	0.9956	6	0	1	0	0	1	1	0	0	0.4463	N	0	FALSE	TRUE
BRD-K03842655	penitrem-a	potassium channel blocker, KCNMA1	498	ATP5F1A	ATP synthase F1 subunit alpha	pQSAR	0.8408	0.8752	0.8752	0.1143	0.5	0.5	0.9956	2	1	1	0	0	0	0	0	0	0.0051	N	0	TRUE	FALSE
BRD-K06543683	bisindolylmaleimide-ix	PKC inhibitor|glycogen synthase kinase inhibitor|leucine rich repeat kinase inhibitor|SIRT inhibitor, SIRT1|AKT1|GSK3B|LCK|LRRK2|MAPK1|MAPK11|MAPK12|MAPK14|MAPK8|PRKCA|ROCK1|RPS6KB1|SIRT2	120892	LRRK2	leucine rich repeat kinase 2	Known	0.5801	0.9123	0.9252	0.7262	0.5	0.4236	0.9956	8	0	1	0	0	0	0	0	1	0.1616	Y	1	FALSE	TRUE
BRD-K06902185	minoxidil	antialopecia agent|ATP channel activator|ATP-sensitive potassium channel agonist|KATP activator|Kir6 channel (KATP) activator|polarization activator|renin secretion stimulant, KCNJ8|ABCC9|KCNJ1|KCNJ10|KCNJ11|PTGS1|REN	100	ADA	adenosine deaminase	pQSAR	0.8927	0.8596	0.8596	0.25	0.5	0.5	0.9956	2	1	1	0	0	0	0	0	0	0.0015	N	0	TRUE	FALSE
BRD-K07572174	curcumin	cyclooxygenase inhibitor|AP inhibitor|CCN expression inhibitor|DNA methyltransferase inhibitor|EGFR expression inhibitor|free radical scavenger|FtsZ inhibitor|glucose 6 phosphatase inhibitor|histone N-acetyltransferase inhibitor|HIV integrase inhibitor|lipoxygenase inhibitor|NFkB pathway inhibitor|tau aggregation inhibitor|unidentified pharmacological activity, PTGS1|PTGS2|APP|CA1|CA12|CA14|CA2|C…	5743	PTGS2	prostaglandin-endoperoxide synthase 2	Known	0.7169	0.8971	0.9328	0.7908	0.5	0.5355	0.9956	8	0	1	0	0	0	0	0	1	0.0361	Y	1	FALSE	TRUE
BRD-K11590034	morin	antioxidant, ADORA2A|CYP1A2|ESR2|FASN|MCL1|SLC22A12	231	AKR1B1	aldo-keto reductase family 1 member B	StructureLikely	0.1736	0.948	0.967	0.8908	0.5	0.5	0.9956	5	0	1	0	0	1	0	0	0	0.9692	N	0	FALSE	TRUE
BRD-K43149758	myricetin	androgen receptor ligand|cytochrome P450 inhibitor, PIK3CG|AR|CYP3A4	3576	CXCL8	C-X-C motif chemokine ligand 8	pQSAR	0.8199	0.8791	0.8791	0.2096	0.5	0.5	0.9956	2	1	1	0	0	0	0	0	0	0.0076	N	0	TRUE	FALSE
BRD-K44227013	ponatinib	Bcr-Abl kinase inhibitor|FLT3 inhibitor|PDGFR tyrosine kinase receptor inhibitor|Abl kinase inhibitor|angiogenesis inhibitor|angiopoietin inhibitor|FGFR antagonist|FGFR inhibitor|KIT inhibitor|RET tyrosine kinase inhibitor|TIE tyrosine kinase inhibitor|VEGFR inhibitor, ABL1|BCR|FLT3|RET|FGFR1|FGFR2|FGFR3|FGFR4|KIT|TEK|CYP2C8|CYP3A5|FGF2|FLT1|KDR|LCK|LYN|PDGFRA|SRC	1956	EGFR	epidermal growth factor receptor	pQSAR	0.946	0.8301	0.8301	0.6405	0.7679	0.4696	0.9956	2	1	1	0	0	0	0	0	0	0.0002	N	0	TRUE	FALSE
BRD-K48099440	prostaglandin-e1	prostanoid receptor agonist|prostanoid receptor antagonist, PTGER1|PTGER2|CATSPER1|CATSPER2|CATSPER3|CATSPER4|PTGDR|PTGER4|PTGIR	5734	PTGER4	prostaglandin E receptor 4	Known	0.6415	0.9062	0.9637	0.9908	0.5	0.5	0.9956	8	0	1	0	0	1	1	0	1	0.0874	Y	1	FALSE	TRUE
BRD-K52459643	prostaglandin-e1	prostanoid receptor agonist|prostanoid receptor antagonist, PTGER1|PTGER2|CATSPER1|CATSPER2|CATSPER3|CATSPER4|PTGDR|PTGER4|PTGIR	5737	PTGFR	prostaglandin F receptor	StructureLikely	0.6396	0.9062	0.9637	0.9115	0.5	0.5	0.9956	5	0	1	0	0	1	0	0	0	0.0892	N	0	FALSE	TRUE
BRD-K59720958	finasteride	5 alpha reductase inhibitor|androgen receptor antagonist|steroid 5alpha-reductase inhibitor, SRD5A2|SRD5A1|AKR1D1|AR	1131	CHRM3	cholinergic receptor muscarinic 3	pQSAR	0.815	0.8805	0.8805	0.3497	0.5	0.5	0.9956	2	1	1	0	0	0	0	0	0	0.0083	N	0	TRUE	FALSE
BRD-K63675182	triflupromazine	acetylcholine receptor ligand|dopamine receptor, HTR2B|CHRM1|CHRM2|CHRNA7|DRD1|DRD2	152	ADRA2C	adrenoceptor alpha 2C	StructureLikely	0.4775	0.9217	0.9352	0.814	0.5	0.5	0.9956	5	0	1	0	0	1	0	0	0	0.371	N	0	FALSE	TRUE
BRD-K68264559	brimonidine	adrenergic receptor agonist, ADRA2A|ADRA2B|ADRA2C|AOX1	150	ADRA2A	adrenoceptor alpha 2A	Known	0.4629	0.9228	0.9228	0.4824	0.5	0.5	0.9956	8	0	1	0	0	0	0	1	1	0.4086	Y	1	FALSE	TRUE
BRD-K71103788	duloxetine	norepinephrine reuptake inhibitor|serotonin reuptake inhibitor|adrenergic transmitter uptake inhibitor|norepinephrine transporter inhibitor|serotonin transporter (SERT) inhibitor|serotonin uptake inhibitor, SLC6A2|SLC6A4|SLC6A3|HTR2A|HTR2C|HTR6	3358	HTR2C	5-hydroxytryptamine receptor 2C	Known	0.4256	0.9262	0.9262	0.3265	0.5	0.5	0.9956	8	0	1	0	0	0	0	0	1	0.5097	Y	1	FALSE	TRUE
BRD-K74741811	norgestrel	progesterone receptor agonist, CYP2E1|PGR	2099	ESR1	estrogen receptor 1	StructureSure	0.3263	0.9347	0.977	0.9908	0.5	0.5	0.9956	6	0	1	0	0	1	1	0	0	0.7666	N	0	FALSE	TRUE
BRD-K82381502	acetylcholine	neurotransmitter of the peripheral and central nervous systems, ACHE|CHRM1|CHRM2|CHRM3|CHRM4|CHRM5|CHRNA2	5226	PGD	phosphogluconate dehydrogenase	pQSAR	0.838	0.8756	0.8756	0.1056	0.5	0.5	0.9956	2	1	1	0	0	0	0	0	0	0.0054	N	0	TRUE	FALSE
BRD-K89104321	gaboxadol	GABA receptor agonist|GABA receptor partial agonist, GABRD|GABRA1|GABRA2|GABRA3|GABRA4|GABRA5|GABRA6|GABRR1|GABRR2|GABRR3	1956	EGFR	epidermal growth factor receptor	pQSAR	0.8599	0.8696	0.8696	0.1264	0.5	0.5	0.9956	2	1	1	0	0	0	0	0	0	0.0034	N	0	TRUE	FALSE
BRD-K89104321	gaboxadol	GABA receptor agonist|GABA receptor partial agonist, GABRD|GABRA1|GABRA2|GABRA3|GABRA4|GABRA5|GABRA6|GABRR1|GABRR2|GABRR3	3269	HRH1	histamine receptor H1	pQSAR	0.8748	0.8651	0.8651	0.1202	0.5	0.5	0.9956	2	1	1	0	0	0	0	0	0	0.0024	N	0	TRUE	FALSE
BRD-K89732114	trifluoperazine	breast cancer resistance protein inhibitor|calcium/calmodulin dependent protein kinase inhibitor|dopamine receptor|dopamine receptor antagonist|sodium channel blocker, DRD2|ABCG2|ADRA1A|CALM1|CALY|CAMK2A|DRD4|HRH1|HTR2A|HTR2C|S100A4|SCN4A|SCN9A|TNNC1	801	CALM1	calmodulin 1	Known	0.7202	0.8968	0.9715	0.9207	0.5	0.5	0.9956	8	0	1	0	0	1	0	0	1	0.0346	Y	1	FALSE	TRUE
BRD-K95773607	darifenacin	acetylcholine receptor antagonist, CHRM3|CHRM1|CHRM2|CHRM4|CHRM5	2562	GABRB3	gamma-aminobutyric acid type A receptor subunit beta3	pQSAR	0.9003	0.8561	0.8561	0.1652	0.5	0.5	0.9956	2	1	1	0	0	0	0	0	0	0.0012	N	0	TRUE	FALSE
BRD-K98493452	honokiol	AKT inhibitor|neurotrophic agent, ALOX5|PTGS1|PTGS2	5743	PTGS2	prostaglandin-endoperoxide synthase 2	Known	0.654	0.9049	0.9049	0.2608	0.5	0.619	0.9956	8	0	1	0	0	0	0	0	1	0.0763	Y	1	FALSE	TRUE
BRD-K99964838	bosutinib	src inhibitor|Abl kinase inhibitor|Bcr-Abl kinase inhibitor|apoptosis stimulant|STAT inhibitor, ABL1|SRC|BCR|CAMK2G|LYN|CAMK1D|CDK2|FRK|FYN|HCK|MAP2K1|MAP2K2|MAP3K2|MAP4K5|STK10|STK24|STK4|TNK2|TXK	6714	SRC	SRC proto-oncogene, non-receptor tyrosine kinase	Known	0.7879	0.8854	0.8854	0.5093	0.6629	0.7324	0.9956	8	0	1	0	0	0	0	1	1	0.0131	Y	1	FALSE	TRUE
BRD-A05352148	ipratropium	acetylcholine receptor antagonist, CHRM1|CHRM2|CHRM3|CHRM4|CHRM5	1131	CHRM3	cholinergic receptor muscarinic 3	Known	0.6566	0.904	0.9586	0.9908	0.5	0.5	0.9955	8	0	1	0	0	1	1	0	1	0.0741	Y	1	FALSE	TRUE
BRD-A16478930	amcinonide	corticosteroid agonist|cytochrome P450 inhibitor|glucocorticoid receptor agonist|immunosuppressant, NR3C1|ANXA1	476	ATP1A1	ATPase Na+/K+ transporting subunit alpha 1	pQSAR	0.8561	0.8694	0.8694	0.2204	0.5	0.5	0.9955	2	1	1	0	0	0	0	0	0	0.0037	N	0	TRUE	FALSE
BRD-A62184259	cycloheximide	glycogen synthase kinase inhibitor|protein synthesis inhibitor, GSK3B|RPL3	7153	TOP2A	DNA topoisomerase II alpha	pQSAR	0.815	0.8793	0.8793	0.1264	0.4469	0.7308	0.9955	2	1	1	0	0	0	0	0	0	0.0083	N	0	TRUE	FALSE
BRD-A64977602	mirtazapine	adrenergic receptor antagonist|serotonin receptor antagonist, ADRA2A|HTR2A|HTR2C|ADRA2C|HTR3A|ADRA1A|ADRA1B|ADRA1D|ADRA2B|ADRB1|ADRB2|DRD1|DRD2|DRD3|DRD5|HRH1|HRH3|HTR2B|HTR7|OPRK1|SLC6A2|SLC6A3|SLC6A4	1812	DRD1	dopamine receptor D1	Known	0.6012	0.9098	0.9481	0.814	0.5	0.5	0.9955	8	0	1	0	0	1	0	0	1	0.1322	Y	1	FALSE	TRUE
BRD-A65449987	flunisolide	cytochrome P450 inhibitor|corticosteroid agonist|corticosteroid hormone receptor agonist|glucocorticoid receptor agonist|immunosuppressant, NR3C1	1131	CHRM3	cholinergic receptor muscarinic 3	pQSAR	0.8317	0.8758	0.8758	0.1264	0.5	0.5	0.9955	2	1	1	0	0	0	0	0	0	0.0061	N	0	TRUE	FALSE
BRD-A67479912	progesterone	progesterone receptor agonist, PGR|CYP17A1|NR3C2|CATSPER1|CATSPER2|CATSPER3|CATSPER4|CYP2C19|ESR1|OPRK1|TRPC5	367	AR	androgen receptor	StructureLikely	0.3285	0.9338	0.9653	0.8398	0.5	0.5001	0.9955	5	0	1	0	0	1	0	0	0	0.7616	N	0	FALSE	TRUE
BRD-A84066268	BRD-A84066268	ATPase inhibitor, ATP1A1|ATP1A2|ATP1A3|ATP1A4|ATP1B1|ATP1B2|ATP1B3|ATP1B4|FXYD2	486	FXYD2	FXYD domain containing ion transport regulator 2	Known	0.2438	0.9411	0.9549	0.9908	0.7635	0.8919	0.9955	8	0	1	1	0	1	1	0	1	0.908	Y	1	FALSE	TRUE
BRD-A87606379	nadolol	adrenergic receptor antagonist, ADRB1|ADRB2|ADRB3	154	ADRB2	adrenoceptor beta 2	Known	0.7768	0.8873	0.9321	0.9908	0.5	0.5	0.9955	8	0	1	0	0	1	1	1	1	0.0156	Y	1	FALSE	TRUE
BRD-K00959089	thenoyltrifluoroacetone	PPAR receptor ligand, CES1|PPARA|SDHA	1131	CHRM3	cholinergic receptor muscarinic 3	pQSAR	0.946	0.8287	0.8287	0.1071	0.5	0.5	0.9955	2	1	1	0	0	0	0	0	0	0.0002	N	0	TRUE	FALSE
BRD-K02265150	amoxapine	adrenergic transmitter uptake inhibitor|dopamine receptor|norepinephrine reputake inhibitor|serotonin receptor antagonist|serotonin reuptake inhibitor|serotonin uptake inhibitor|tricyclic antidepressant, SLC6A2|SLC6A4|HTR2A|HTR6|ADRA1A|ADRA1B|ADRA1D|ADRA2A|ADRA2B|ADRA2C|CHRM1|CHRM2|CHRM3|CHRM4|CHRM5|DRD1|DRD2|DRD3|DRD4|GABRA1|GABRA2|GABRA3|GABRA4|GABRA5|GABRA6|GABRB1|GABRB2|GABRB3|GABRD|GABRE|GAB…	2565	GABRG1	gamma-aminobutyric acid type A receptor subunit gamma1	Known	0.397	0.9279	0.9279	0.4608	0.5	0.5	0.9955	8	0	1	0	0	0	0	0	1	0.5888	Y	1	FALSE	TRUE
BRD-K02404261	caffeine	adenosine receptor antagonist|ATM kinase inhibitor|ATR kinase inhibitor, ADORA1|ADORA2A|ADORA2B|ATM|ITPR1|RYR1|ADORA3|ATR|ITPR2|ITPR3|PDE10A|PDE11A|PDE1A|PDE1B|PDE1C|PDE2A|PDE3A|PDE3B|PDE4A|PDE4B|PDE4C|PDE4D|PDE5A|PDE6A|PDE6B|PDE6C|PDE7A|PDE7B|PDE8A|PDE8B|PDE9A|PIK3CA|PIK3CB|PIK3CD|PRKDC|RYR2|RYR3	5144	PDE4D	phosphodiesterase 4D	Known	0.5777	0.9118	0.9367	0.7156	0.5	0.5	0.9955	8	0	1	0	0	0	0	0	1	0.1653	Y	1	FALSE	TRUE
BRD-K20141153	atomoxetine	norepinephrine transporter inhibitor|adrenergic transmitter uptake inhibitor, SLC6A2|SLC6A3|SLC6A4|GRIN1|GRIN2A|GRIN2B|GRIN2C|GRIN2D|GRIN3A|GRIN3B	116443	GRIN3A	glutamate ionotropic receptor NMDA type subunit 3A	Known	0.3149	0.9349	0.9349	0.4824	0.5	0.5	0.9955	8	0	1	0	0	0	0	0	1	0.791	Y	1	FALSE	TRUE
BRD-K20141153	atomoxetine	norepinephrine transporter inhibitor|adrenergic transmitter uptake inhibitor, SLC6A2|SLC6A3|SLC6A4|GRIN1|GRIN2A|GRIN2B|GRIN2C|GRIN2D|GRIN3A|GRIN3B	1577	CYP3A5	cytochrome P450 family 3 subfamily A member 5	pQSAR	0.8284	0.8766	0.8766	0.1692	0.5	0.5	0.9955	2	1	1	0	0	0	0	0	0	0.0065	N	0	TRUE	FALSE
BRD-K30240666	clemastine	histamine receptor antagonist, HRH1	2099	ESR1	estrogen receptor 1	pQSAR	0.8561	0.8695	0.8695	0.1989	0.5	0.5	0.9955	2	1	1	0	0	0	0	0	0	0.0037	N	0	TRUE	FALSE
BRD-K30466858	ellagic-acid	aldose reductase inhibitor|beta-secretase inhibitor|glutathione transferase inhibitor|HCV inhibitor|HIV integrase inhibitor|quorum sensing signaling modulator|reverse transcriptase inhibitor, CA1|CA12|CA14|CA2|CA4|CA6|CA9|SYK|AKR1B1|BACE1|CA3|CA5A|CA5B|CA7|CSNK2A1|GSK3B|PRKACA|PRKCA|PRKCB|SQLE	231	AKR1B1	aldo-keto reductase family 1 member B	Known	0.4229	0.9257	0.9257	0.3613	0.5	0.5	0.9955	8	0	1	0	0	0	0	0	1	0.5173	Y	1	FALSE	TRUE
BRD-K31987754	oleylethanolamide	Glucose-Dependent Insulinotropic Receptor (GDIR, GPR119) Agonists|potassium channel blocker, GPR119|CNR1|GPR55|KCND3|PPARA	5465	PPARA	peroxisome proliferator activated receptor alpha	Known	0.5031	0.919	0.9769	0.9908	0.5	0.5	0.9955	8	0	1	0	0	1	1	0	1	0.3088	Y	1	FALSE	TRUE
BRD-K32247306	primidone	GABA receptor antagonist|unidentified pharmacological activity, GABRA1|CHRNA4|CHRNA7|GABRA2|GABRA3|GABRA4|GABRA5|GABRA6|GABRB1|GABRB2|GABRB3|GABRD|GABRE|GABRG1|GABRG2|GABRG3|GABRP|GABRQ|GRIA2|GRIK2	1131	CHRM3	cholinergic receptor muscarinic 3	pQSAR	0.8951	0.8576	0.8576	0.4824	0.5	0.5	0.9955	2	1	1	0	0	0	0	0	0	0.0014	N	0	TRUE	FALSE
BRD-K88871508	lisuride	dopamine receptor agonist|prolactin inhibitor|serotonin receptor antagonist|serotonin receptor ligand, DRD2|HTR2B|HTR2C|ADRA2A|ADRA2B|ADRA2C|DRD1|DRD3|DRD4|DRD5|HTR1A|HTR1B|HTR1D|HTR2A|ADRA1A|HRH1|HTR6	150	ADRA2A	adrenoceptor alpha 2A	Known	0.6512	0.9039	0.9464	0.7465	0.5	0.5	0.9955	8	0	1	0	0	0	0	0	1	0.0787	Y	1	FALSE	TRUE
BRD-K91263825	nortriptyline	PI3K inhibitor|potassium channel blocker|tricyclic antidepressant (TCA), KCNJ10|SLC6A2|SLC6A4|ADRA1A|ADRA1B|ADRA1D|ADRA2A|ADRA2B|ADRA2C|ADRB1|ADRB2|ADRB3|CHRM1|CHRM2|CHRM3|CHRM4|CHRM5|CYP2C19|DRD2|HRH1|HTR1A|HTR2A|HTR2C|HTR6|PGRMC1|PIK3CD|SIGMAR1	150	ADRA2A	adrenoceptor alpha 2A	Known	0.351	0.9316	0.9572	0.7546	0.5	0.5	0.9955	8	0	1	0	0	0	0	0	1	0.7091	Y	1	FALSE	TRUE
BRD-K96778649	tyrphostin-47	EGFR inhibitor|epidermal growth factor receptor (EGFR) inhibitor, EGFR	3576	CXCL8	C-X-C motif chemokine ligand 8	NCI60	0.3474	0.9323	0.9323	0.4398	0.5	0.8031	0.9955	3	0	1	1	0	0	0	0	0	0.7178	N	0	FALSE	TRUE
BRD-K96799727	pifithrin-mu	HSP inhibitor, HSPA1A|TP53	5624	PROC	protein C, inactivator of coagulation factors Va and VIIIa	pQSAR	0.815	0.8797	0.8797	0.1419	0.5	0.5	0.9955	2	1	1	0	0	0	0	0	0	0.0083	N	0	TRUE	FALSE
BRD-K97399794	quercetin	aldose reductase inhibitor|cytokine production inhibitor|EGFR inhibitor|glucosidase inhibitor|monoamine oxidase inhibitor|polar auxin transport inhibitor|quorum sensing signaling modulator|SIRT activator|sodium channel blocker|tyrosine phosphatase inhibitor|xanthine oxidase inhibitor, PIK3CG|AKR1B1|ATP5A1|ATP5B|ATP5C1|CYP2C8|EGFR|GAA|HCK|HIBCH|MAOA|PIM1|PTPN1|SCN5A|SIRT1|STK17B|UGT3A1|XDH	2100	ESR2	estrogen receptor 2	StructureLikely	0.6099	0.9088	0.9595	0.8432	0.5	0.5	0.9955	5	0	1	0	0	1	0	0	0	0.1212	N	0	FALSE	TRUE
BRD-A36267905	buphenine	adrenergic receptor agonist, ADRB2	8503	PIK3R3	phosphoinositide-3-kinase regulatory subunit 3	pQSAR	0.8699	0.8651	0.8651	0.25	0.5	0.5	0.9954	2	1	1	0	0	0	0	0	0	0.0027	N	0	TRUE	FALSE
BRD-A50928468	norgestrel	progesterone receptor agonist, CYP2E1|PGR	2099	ESR1	estrogen receptor 1	StructureSure	0.3125	0.9347	0.977	0.9908	0.5	0.5	0.9954	6	0	1	0	0	1	1	0	0	0.7958	N	0	FALSE	TRUE
BRD-A72703248	SKF-96365	calcium channel blocker|cytochrome P450 inhibitor, CYP3A4|TRPC1|PKD2|TRPC3|TRPC4|TRPC5|TRPV2	25797	QPCT	glutaminyl-peptide cyclotransferase	pQSAR	0.9168	0.8466	0.8466	0.5021	0.5	0.5	0.9954	2	1	1	0	0	0	0	0	0	0.0007	N	0	TRUE	FALSE
BRD-A82371568	clofarabine	ribonucleoside reductase inhibitor|DNA polymerase inhibitor|DNA repair enzyme inhibitor|DNA synthesis inhibitor|ribonucleotide reductase inhibitor, RRM1|POLA1|RRM2|SLC22A8	3091	HIF1A	hypoxia inducible factor 1 subunit alpha	pQSAR	0.8748	0.8634	0.8634	0.1128	0.5967	0.7029	0.9954	2	1	1	0	0	0	0	0	0	0.0024	N	0	TRUE	FALSE
BRD-K01648091	LE-300	dopamine receptor antagonist|dopamine receptor ligand|serotonin receptor ligand, DRD5|DRD1|HTR2A	1812	DRD1	dopamine receptor D1	Known	0.5537	0.9139	0.9139	0.4967	0.5	0.5	0.9954	8	0	1	0	0	0	0	0	1	0.2051	Y	1	FALSE	TRUE
BRD-K12502280	TG-101348	JAK inhibitor|FLT3 inhibitor|RET tyrosine kinase inhibitor, JAK2|FLT3|BRD4|JAK1|JAK3|RET|TYK2	5979	RET	ret proto-oncogene	Known	0.7217	0.8942	0.8942	0.2823	0.5	0.5	0.9954	8	0	1	0	0	0	0	1	1	0.0339	Y	1	FALSE	TRUE
BRD-K22947005	dexbrompheniramine	histamine receptor antagonist, HRH1	154	ADRB2	adrenoceptor beta 2	pQSAR	0.8086	0.8802	0.8802	0.373	0.5	0.5	0.9954	2	1	1	0	0	0	0	0	0	0.0093	N	0	TRUE	FALSE
BRD-K28687144	fosfosal	phosphodiesterase inhibitor, PDE4A|PDE4B|PDE4C|PDE4D|PTGS1|PTGS2	3784	KCNQ1	potassium voltage-gated channel subfamily Q member 1	pQSAR	0.8438	0.8717	0.8717	0.5236	0.5	0.5	0.9954	2	1	1	0	0	0	0	0	0	0.0048	N	0	TRUE	FALSE
BRD-K29983336	rondual-kinase-inhibitor	hepatocyte growth factor receptor inhibitor, MET	5159	PDGFRB	platelet derived growth factor receptor beta	pQSAR	0.8086	0.8804	0.8804	0.4049	0.5	0.5	0.9954	2	1	1	0	0	0	0	0	0	0.0093	N	0	TRUE	FALSE
BRD-K30466858	ellagic-acid	aldose reductase inhibitor|beta-secretase inhibitor|glutathione transferase inhibitor|HCV inhibitor|HIV integrase inhibitor|quorum sensing signaling modulator|reverse transcriptase inhibitor, CA1|CA12|CA14|CA2|CA4|CA6|CA9|SYK|AKR1B1|BACE1|CA3|CA5A|CA5B|CA7|CSNK2A1|GSK3B|PRKACA|PRKCA|PRKCB|SQLE	5578	PRKCA	protein kinase C alpha	Known	0.406	0.9268	0.9268	0.4824	0.5	0.6056	0.9954	8	0	1	0	0	0	0	0	1	0.5639	Y	1	FALSE	TRUE
[truncated: 3,662 more rows]
