# Supplementary material for: Drug target prediction through deep learning functional representation of gene signatures
Source: Research Square preprint supplement (doi:10.21203/rs.3.rs-3371688/v1), 2023-09-28
Supplement: Supplementary file 3 [file 4e63f57a1fe7e7bbddb85d8f.xlsx]

## Sheet: Table S3. KinasesSingleDose
Table S3. Single-dose confirmation rates for 1116 compounds across 19 kinase assays.
Target	Compounds Predicted to be Binders				Compounds Not Predicted to be Binders				P-value	Enrichment Factor
	Total Compounds Predicted	#Hits	Confirmation Rate (CR)	STDV of CR	Total Compounds Not Predicted	#Hits	Confirmation Rate (CR)	STDV of CR
AURKA	156	39	0.25	0.035	960	37	0.039	0.0062	6.3e-22	6.5
BRAF	154	23	0.15	0.029	962	23	0.024	0.0049	8.8e-13	6.2
CDK2	389	42	0.11	0.016	727	12	0.017	0.0047	1.6e-11	6.5
CDK4	278	30	0.11	0.019	838	28	0.033	0.0062	1.3e-06	3.2
EGFR	677	127	0.19	0.015	439	23	0.052	0.011	8.9e-11	3.6
FLT3	305	89	0.29	0.026	811	53	0.065	0.0087	6.5e-24	4.5
GSK3B	501	57	0.11	0.014	615	12	0.02	0.0056	9e-11	5.8
IGF1R	178	27	0.15	0.027	938	19	0.02	0.0046	1.6e-15	7.5
INSR	200	33	0.17	0.026	916	17	0.019	0.0045	3.3e-19	8.9
KDR	403	70	0.17	0.019	713	9	0.013	0.0042	1.2e-23	14
KIT	202	43	0.21	0.029	914	75	0.082	0.0091	4.5e-08	2.6
LCK	562	80	0.14	0.015	554	21	0.038	0.0081	1.1e-09	3.8
LYN	117	54	0.46	0.046	999	49	0.049	0.0068	2.1e-47	9.4
MAPK14	489	32	0.065	0.011	627	9	0.014	0.0048	7.1e-06	4.6
PDGFRA	436	144	0.33	0.023	680	97	0.14	0.013	9.4e-14	2.3
PRKCA	658	25	0.038	0.0075	458	40	0.087	0.013	0.00043	0.44
RET	159	70	0.44	0.039	957	71	0.074	0.0085	1.8e-37	5.9
ROCK1	250	22	0.088	0.018	866	23	0.027	0.0055	1.5e-05	3.3
SRC	289	64	0.22	0.024	827	32	0.039	0.0067	2.3e-21	5.7
