# Supplementary material for: Drug target prediction through deep learning functional representation of gene signatures
Source: Research Square preprint supplement (doi:10.21203/rs.3.rs-3371688/v1), 2023-09-28
Supplement: Supplementary file 4 [file 655f5af38c098ec5a0707289.xlsx]

## Sheet: Table S1. Model Comparison
Note	Model	F1	MCC	TP	FP	TN	FN	Precision	Specificity	AUC	PCAUC
*	L	0.640032	0.304119	1449	738.866	1601.13	891	0.662289	0.684245	0.651738	0.728644
*	pQSAR (Q)	0.705375	0.334905	1911	1167.36	1172.64	429	0.620785	0.501129	0.658898	0.867185
*	Combined (LQ)	0.784179	0.642996	1605	148.429	2191.57	735	0.915349	0.936569	0.811233	0.892522
+	LQ_NB(Clip)	0.666662	0	2340	2340	0	0	0.5	0	0.5	0.876286
+	LQ_NB	0.757382	0.487469	1887	755.921	1584.08	453	0.713983	0.676957	0.741684	0.872237
#	NCI60	0.528656	0.0391125	1261	1169.55	1170.45	1079	0.518814	0.500194	0.519542	0.598164
#	PSP	0.498444	-0.00192357	1165	1169.5	1170.5	1175	0.499036	0.500213	0.499038	0.520556
$	S (SAR)	0.619662	0.220221	1487	972.354	1367.65	853	0.60463	0.584464	0.609967	0.807804
@	L_NCI60	0.641697	0.32957	1410	644.564	1695.44	930	0.686277	0.724545	0.663555	0.75542
%	L_PSP	0.639448	0.304867	1444	732.357	1607.64	896	0.663494	0.687027	0.652061	0.729686
Notes
*	Model L, Model pQSAR (a.k.a Model Q), and the combined model (a.k.a. Model LQ) were compared in Fig. S5a, where the integration of transcriptional data (L) and pharmacological data (Q) in Model LQ outperforms Model L and Model Q alone.
	Model LQ is the best-performing model based on all metrics. Model S is not considered as its application is limited to predicting structural analogs of known reference compounds.
+	Two forms of naive Bayesian (NB) models were compared with Model LQ in Fig. S8. Model LQ outperforms naive Bayesian models.
#	Model Q outperforms the models based on NCI60 data (Fig. S7) or in-house PSP data.
$	Models based on structural similarity. They are not adopted as their applications are limited to predicting structural analogs of known reference compounds.
	Model SAR was trained based on a balanced in-house dataset, however, it is unable to capture remote structural analogs.
	As we are interested in the ability of predicting compounds dissimilar to any reference compounds, Model SAR was only used for validation purpose instead of prediction.
@	Model L_NCI60 integrates transcriptional data (L) and pharmacological data as provided by the NCI60 dataset.
%	Model L_PSP integrates transcriptional data (L) and pharmacological data as provided by the PSP dataset.
