# Supplementary material for: Drug target prediction through deep learning functional representation of gene signatures
Source: Research Square preprint supplement (doi:10.21203/rs.3.rs-3371688/v1), 2023-09-28
Supplement: Supplementary file 5 [file 6894431c0c5477ef518f7b38.xlsx]

## Sheet: TableS5.KinaseHeatMap
Broad ID	cpd_name	cpd_broad	Is_Selective	IC50_BRAF	IC50_EGFR	IC50_GSK3B	IC50_CDK4	IC50_ROCK1	IC50_PRKCA	IC50_KIT	IC50_RET	IC50_PDGFRA	HitCategory_BRAF	HitCategory_EGFR	HitCategory_GSK3B	HitCategory_CDK4	HitCategory_ROCK1	HitCategory_PRKCA	HitCategory_KIT	HitCategory_RET	HitCategory_PDGFRA	Model_BRAF	Model_EGFR	Model_GSK3B	Model_CDK4	Model_ROCK1	Model_PRKCA	Model_KIT	Model_RET	Model_PDGFRA
BRD-K10670311	sulfasalazine	cyclooxygenase inhibitor|disease modifying antirheumatic drug|lipoxygenase inhibitor|NFkB pathway inhibitor|prostanoid receptor inhibitor|thromboxane receptor antagonist, PTGS1|PTGS2|ACAT1|ALOX5|CHUK|IKBKB|PLA2G1B|PPARG|SLC46A1|SLC7A11|TBXAS1	TRUE	50	19.2007	45.6827	50	50	33.0309	21.2308	47.0269	33.2978	TN	TP	TN	TN	TN	FP	TN	TN	TN		Q
BRD-A01320529	salmeterol	adrenergic receptor agonist, ADRB2	TRUE	50	4.18525	50	50	50	39.7525	50	50	32.7135	TN	TP	TN	TN	TN	FP	TN	TN	TN		LQ
BRD-K43796186	benzyl-quinazolin-4-yl-amine	epidermal growth factor receptor (EGFR) inhibitor, EGFR	TRUE	50	18.881	50	50	50	50	50	39.4026	50	TN	TP	TN	TN	TN	TN	TN	TN	FP		L
BRD-K35458079	edaravone	free radical scavenger, BCL2	TRUE	50	0.126435	50	50	50	50	50	50	50	TN	TP	TN	TN	FP	FP	TN	TN	FP		LQ
BRD-A99182808	usnic-acid	antibacterial agent, PTPN1	TRUE	50	19.4013	50	50	50	50	38.7193	38.4182	41.998	TN	TP	FP	TN	TN	TN	TN	TN	TN		Q
BRD-K22031190	diflunisal	cyclooxygenase inhibitor|prostanoid receptor inhibitor, PTGS2|PTGS1	TRUE	50	9.18877	50	50	50	50	34.5701	50	50	TN	TP	FP	TN	TN	FP	TN	TN	FP		Q
BRD-K80725632	lavendustin-c	epidermal growth factor receptor (EGFR) inhibitor, CAMK2A|EGFR|SRC	TRUE	50	15.3747	50	50	50	50	50	33.9295	37.8725	TN	TP	FP	TN	TN	FP	TN	TN	FP		Q
BRD-K83988098	alvespimycin	HSP inhibitor|HSP antagonist, HSP90AA1	TRUE	50	0.443145	50	50	50	50	50	50	50	TN	TP	FP	FP	TN	FP	TN	TN	FP		LQ
BRD-A61304759	tanespimycin	HSP inhibitor|CHK inhibitor|HSP antagonist, HSP90AA1|CHEK1	TRUE	50	1.06278	50	50	50	50	50	50	50	TN	TP	FP	FP	TN	FP	TN	FP	FP		LQ
BRD-K01192156	tyrphostin-AG-112	protein tyrosine kinase inhibitor, EGFR	TRUE	50	12.7007	14.6865	50	50	50	50	46.021	40.5087	TN	TP	TP	TN	FP	FP	FP	TN	FP		L	Q
BRD-A76941896	doxorubicin	topoisomerase inhibitor|DNA intercalating drug, TOP2A	TRUE	2.39583	1.4079	30.0297	50	50	50	50	50	50	FN	TP	TN	FP	TN	FP	FP	TN	TN		Q
BRD-K24681473	YM-155	survivin inhibitor|XIAP expression inhibitor, BIRC5	TRUE	50	0.043115	50	3.22684	50	50	50	50	50	TN	FN	TN	TP	TN	TN	TN	TN	TN				L
BRD-K03109492	NSC-663284	CDC inhibitor, CDC25A|CDC25B|CDC25C	TRUE	50	0.240665	50	12.6958	50	43.7051	50	50	50	TN	TP	TN	TP	TN	TN	TN	TN	TN		LQ		LQ
BRD-K28849549	mesalazine	cyclooxygenase inhibitor|arylamine N-acetyltransferase inhibitor|beta catenin inhibitor|lipoxygenase inhibitor|prostanoid receptor inhibitor|protein phosphatase inhibitor|thromboxane receptor antagonist|thromboxane synthase inhibitor, PTGS1|PPARG|PTGS2|ALOX5|CHUK|CTNNB1|IKBKB|MPO|NAT1	TRUE	50	1.64624	50	7.89945	50	50	50	50	45.9943	TN	TP	FP	FN	TN	FP	TN	TN	FP		Q
BRD-K83794624	pirarubicin	topoisomerase inhibitor, TOP2A	TRUE	50	0.7129	50	0.86108	50	50	39.6037	50	50	TN	TP	FP	TP	TN	FP	FP	TN	FP		Q		Q
BRD-K36395411	SB-206553	serotonin receptor antagonist|serotonin receptor partial agonist, HTR2B|HTR2C|HTR1A|HTR2A	TRUE	50	1.04622	50	14.2917	50	50	50	50	50	TN	TP	FP	FN	TN	TN	TN	FP	FP		L
BRD-K56483981	chicago-sky-blue-6b	glutamate transporter modulator|macrophage migration inhibiting factor inhibitor, MIF	FALSE	1.03821	0.48571	1.25287	0.51494	50	0.80344	1.14968	50	50	FN	TP	TP	FN	TN	TP	FN	TN	TN		Q	Q			Q
BRD-K94176593	TWS-119	glycogen synthase kinase inhibitor, GSK3B|JUN|MYC	FALSE	0.21951	0.098925	0.230375	13.3301	50	8.86265	0.190465	0.02286	0.02286	TP	TP	TP	TP	FP	TP	TP	TP	TP	Q	L	L	L		LQ	L	LQ	Q
BRD-K49669041	BX-912	AKT inhibitor|phosphoinositide dependent kinase inhibitor|pyruvate dehydrogenase kinase inhibitor, PDPK1|AKT2|CDK2|CHEK1|GSK3B|KDR|PDK1	FALSE	0.20756	2.72493	1.26125	0.662245	0.9699	0.30968	1.51455	0.044045	0.02286	TP	TP	TP	TP	FN	TP	TP	TP	TP	Q	Q	LQ	Q		LQ	Q	Q	Q
BRD-K66175015	afatinib	EGFR inhibitor|receptor tyrosine protein kinase inhibitor|tyrosine kinase inhibitor, EGFR|ERBB2|ERBB4	TRUE	50	50	14.0183	50	50	50	19.8134	50	50	FP	FP	TP	FP	TN	TN	TP	FP	FP			LQ				Q
BRD-K43389698	BMS-387032	CDK inhibitor|cell cycle inhibitor|MCL1 inhibitor, CDK2|CDK7|CDK9|MCL1	FALSE	50	50	0.72848	1.49584	5.60624	50	16.002	50	31.9468	TN	FP	TP	TP	FN	TN	FN	TN	FP			L	LQ
BRD-K91904471	SD-169	p38 MAPK inhibitor, MAPK14	TRUE	50	49.8372	5.81379	50	25.2185	50	50	50	50	TN	FP	TP	FP	TN	FP	FP	TN	FP			Q
BRD-K13390322	AT-7519	CDK inhibitor|cell cycle inhibitor, CDK2|CDK5|CDK1|CDK4|CDK6|CDK9	TRUE	50	50	0.038495	0.18564	50	50	50	50	50	TN	TN	TP	TP	FP	TN	TN	TN	TN			LQ	LQ
BRD-K97118047	4,5,6,7-tetrabromobenzotriazole	casein kinase inhibitor, CSNK2A1|AKT1|CHEK1|CSNK2A2|CSNK2B|GSK3B|LCK|MAP2K1|MAPK1|MAPK11|MAPK12|MAPK14|MAPK8|PRKCA|ROCK1|RPS6KB1|SGK1	TRUE	50	50	9.06833	17.4538	37.4105	50	50	50	50	TN	FP	TP	FN	FP	FP	FP	TN	TN			Q
BRD-K64800655	PHA-793887	CDK inhibitor, CDK1|CDK2|CDK4|CDK5|CCND1|CCNE1|CDK7|CDK9	FALSE	50	50	0.02286	0.04448	50	1.30191	50	18.0719	50	TN	TN	TP	TP	FP	FN	TN	FN	TN			LQ	L
BRD-K79090631	CGP-60474	CDK inhibitor|PKC inhibitor, CDK1|CDK2	FALSE	50	50	0.02286	0.02286	1.84414	0.07349	50	50		FP	TN	TP	TP	FN	FN	FP	FP				Q	LQ
BRD-K30466858	ellagic-acid	aldose reductase inhibitor|beta-secretase inhibitor|glutathione transferase inhibitor|HCV inhibitor|HIV integrase inhibitor|quorum sensing signaling modulator|reverse transcriptase inhibitor, CA1|CA12|CA14|CA2|CA4|CA6|CA9|SYK|AKR1B1|BACE1|CA3|CA5A|CA5B|CA7|CSNK2A1|GSK3B|PRKACA|PRKCA|PRKCB|SQLE	FALSE	8.38523	50	3.31864	0.29507	50	0.704845	50	50	50	FN	FP	TP	FN	FP	TP	TN	TN	FP			Q			Q
BRD-K08554278	bisbenzimide	BCL inhibitor|DNA binding|topoisomerase inhibitor, BCL2L1|TOP1	FALSE	1.85882	14.3505	11.5237	3.68949	15.7928	0.12349	50	50	50	FN	TP	TP	TP	FN	FN	FP	FP	FP		Q	LQ	LQ
BRD-K04923131	GSK-3-inhibitor-IX	glycogen synthase kinase inhibitor|lipoxygenase inhibitor|PKC inhibitor, ALOX5|GSK3A|GSK3B	TRUE	50	50	50	0.67207	50	50	50	50	50	FP	FP	FP	TP	FP	FP	FP	FP	FP				Q
BRD-K07859598	GW-5074	RAF inhibitor|leucine rich repeat kinase inhibitor, LRRK1|LRRK2|NTRK1|RAF1	TRUE	0.02286	50	50	8.72911	22.6598	50		50	50	FN	FP	FP	TP	FP	FP		FP	FP				Q
BRD-K97764662	PD-173074	FGFR inhibitor|VEGFR inhibitor, FGFR1|FGFR3|FGFR2|FGFR4|FLT1|FLT4|KDR|PDGFRA|PDGFRB	FALSE	7.02229	50	37.227	0.02286	50	50	50	0.17389	0.238145	TP	FP	TN	FN	TN	TN	FP	TP	TP	LQ							LQ	LQ
BRD-K56064827	EI-273	PKC inhibitor, PRKCA|PRKCG	FALSE	13.1398	27.9703	23.2884	0.26782	50	50	1.57668	3.19203	0.702055	FN	FP	FP	FN	FP	FP	FN	FN	TP									LQ
BRD-K67578145	GDC-0879	RAF inhibitor, BRAF	TRUE	0.02286	50	50	50	50	50	50	50	50	TP	TN	FP	TN	FP	FP	TN	TN	FP	L
BRD-K12343256	trametinib	MEK inhibitor, MAP2K1|MAP2K2|CYP2C8|CYP3A4	TRUE	0.11295	50	50	50	50	50	50	50	50	TP	FP	FP	FP	TN	TN	TN	FP	FP	Q
BRD-K74514084	pazopanib	VEGFR inhibitor|KIT inhibitor|PDGFR tyrosine kinase receptor inhibitor|angiogenesis inhibitor|RAF inhibitor|tyrosine kinase inhibitor|VEGFR antagonist, KDR|KIT|FLT1|FLT4|PDGFRB|PDGFRA|BRAF|CSF1R|CYP2B6|CYP2C8|CYP2E1|DDR2|FGF1|FGFR1|FGFR3|ITK|SH2B3	TRUE	9.19352	31.4698	8.69143	50	50	50	50	37.558	26.826	TP	FP	TP	FP	TN	TN	FP	FP	FP	Q		Q
BRD-K55591206	epigallocatechin	AP inhibitor|aromatase inhibitor|bacterial efflux pump inhibitor|beta amyloid aggregation inhibitor|beta amyloid protein neurotoxicity inhibitor|beta secretase inhibitor|DNA gyrase inhibitor|dual specificity tyrosine-(Y)-phosphorylation regulated kinase inhibitor|enoyl-(acyl-carrier protein) reductase Fabl inhibitor|fatty acid synthase inhibitor|HCV inhibitor|indoleamine 2,3-dioxygenase inhibitor…	FALSE	2.56021	11.666	3.67062	50	39.3651	50	0.27603	0.91703	50	FN	TP	TP	TN	TN	FP	FN	FN	TN		Q	Q
BRD-K24576554	AT-9283	Aurora kinase inhibitor|JAK inhibitor|Abl kinase inhibitor|Bcr-Abl kinase inhibitor|FLT3 inhibitor|mitotic inhibitor|protein kinase inhibitor, AURKA|AURKB|ABL1|BCR|FLT3|JAK2|JAK3|RPS6KA6|STK17A	FALSE	3.78426	0.165085	0.02286	0.078295	1.61814	0.053365	0.26984	0.02286	0.02286	TP	TP	TP	TP	TP	FN	TP	TP	TP	LQ	Q	Q	LQ	Q		Q	Q	Q
BRD-K65639003	icariin	neuromedin receptor agonist|sorbitol dehydrogenase inhibitor, NMUR2|PDE5A|SORD	TRUE	50	50	50	50	50	50	50	33.495	4.05002	TN	FP	TN	TN	TN	FP	TN	TN	TP									LQ
BRD-A55424491	methotrexate	dihydrofolate reductase inhibitor|disease modifying antirheumatic drug|folate receptor antagonist|immunosuppressant|thymidylate synthase inhibitor, DHFR|AOX1|FOLR1|TYMS	TRUE	50	42.2833	50	50	50	50	50	50	10.0189	TN	FP	TN	FP	TN	TN	TN	TN	TP									Q
BRD-K80738081	resveratrol	apolipoprotein expression enhancer|beta-secretase inhibitor|cyclooxygenase inhibitor|cytochrome P450 inhibitor|lipid peroxidase inhibitor|MAP kinase inhibitor|monoamine oxidase inhibitor|NFkB pathway modulator|SIRT activator|SIRT pathway|SIRT stimulant|sodium channel blocker|thioredoxin reductase inhibitor|topoisomerase inhibitor|xanthine oxidase inhibitor, PTGS1|PTGS2|SIRT1|APOA1|BACE1|CSNK2A1|M…	TRUE		50							4.21945		FP							TP									LQ
BRD-K04853698	LDN-193189	ALK inhibitor|serine/threonine protein kinase inhibitor, ACVR1|BMPR1A	TRUE	50	50	50	50	50	50	50	50	0.400395	FP	FP	TN	FP	FP	FP	FP	FP	TP									Q
BRD-K59456551	methotrexate	dihydrofolate reductase inhibitor|disease modifying antirheumatic drug|folate receptor antagonist|immunosuppressant|thymidylate synthase inhibitor, DHFR|AOX1|FOLR1|TYMS	TRUE	50	50	50	50	50	50	50	50	3.00014	TN	FP	FP	FP	TN	TN	FP	TN	TP									L
BRD-K32330832	VER-155008	HSP inhibitor, HSPA1A	TRUE	50	50	50	50	50	50	50	50	0.117965	TN	FP	FP	FP	FP	TN	TN	TN	TP									LQ
BRD-K57546357	prunetin	breast cancer resistance protein inhibitor, ABCG2|ALDH2	TRUE	50	39.1785	50	50	50	50	50	50	16.5519	TN	FP	FP	TN	FP	FP	TN	TN	TP									LQ
BRD-K49657628	tyrphostin-AG-18	epidermal growth factor receptor (EGFR) inhibitor|tyrosine kinase inhibitor, EGFR	TRUE	50	50	50	22.2541	50	50	39.0845	40.4768	2.18703	TN	FP	FP	TN	FP	FP	TN	TN	TP									Q
BRD-K06234293	LY-364947	TGF beta receptor inhibitor|p38 MAPK inhibitor, TGFBR1	TRUE	50	50	36.4605	50	50	45.1677	50	50	0.35179	TN	FP	FP	TN	FP	FP	FP	TN	TP									LQ
BRD-K81528515	nilotinib	Bcr-Abl kinase inhibitor|Abl kinase inhibitor|discoidin domain containing receptor inhibitor|KIT inhibitor|PDGFR tyrosine kinase receptor inhibitor, ABL1|KIT|BCR|CYP2B6|CYP2C8|DDR1|DDR2|PDGFRA	TRUE	50	50	50	50	50	50	50	50	0.02286	FP	FP	FP	TN	TN	TN	FP	FP	TP									Q
BRD-K59369769	tozasertib	Aurora kinase inhibitor|Bcr-Abl kinase inhibitor|FLT3 inhibitor|JAK inhibitor|Abl kinase inhibitor|mitotic inhibitor, AURKA|AURKB|ABL1|AURKC|BCR|FLT3|JAK2|DDR2|LCK	TRUE	50	50	50	50	50	32.6555	50	50	0.134025	FP	FP	FP	FP	TN	TN	FP	FP	TP									Q
BRD-K41410256	balsalazide	cyclooxygenase inhibitor|prostanoid receptor inhibitor|thromboxane receptor antagonist, PTGS1|PTGS2|ALOX5|PPARG	TRUE	50	1.05639	50	50	50	50	50	50	7.48307	TN	TP	FP	TN	TN	FP	TN	TN	FN		Q
BRD-K15563106	phloretin	VCAM expression inhibitor|ICAM1 expression inhibitor, AQP9|CLCN3|SLC23A1	TRUE	50	0.25803	50	35.0219	35.438	50	50	20.8181	0.87751	TN	TP	FP	TN	TN	FP	TN	TN	TP		Q							Q
BRD-K64890080	BI-2536	PLK inhibitor|apoptosis stimulant|cell cycle inhibitor|protein kinase inhibitor, PLK1|BRD4|PLK2|PLK3	TRUE	50	16.0542	50		36.0705	1.54637	50	50	7.19304	FP	TP	TN		TN	FN	FP	FP	TP		L							Q
BRD-K33583600	isoliquiritigenin	guanylate cyclase activator|aldose reductase inhibitor|glutamate receptor antagonist|histamine receptor antagonist|SIRT activator, AKR1B1|HRH2|SIRT1	TRUE	50	45.2611	50	50	50	50	1.6666	37.3309	1.00679	TN	FP	FP	TN	FP	FP	FN	TN	TP									L
BRD-K71035033	masitinib	KIT inhibitor|PDGFR tyrosine kinase receptor inhibitor|src inhibitor|c-kit inhibitor|FGFR antagonist|FGFR inhibitor|tyrosine kinase inhibitor, KIT|FGFR3|LYN|PDGFRA|PDGFRB	TRUE	50	50	50	50	50	24.4555	0.077605	50	0.02286	FP	FP	TN	TN	TN	TN	TP	FP	TP							Q		Q
BRD-K99749624	linifanib	PDGFR tyrosine kinase receptor inhibitor|VEGFR inhibitor|angiogenesis inhibitor|colony stimulating factor receptor antagonist|colony stimulating factor receptor inhibitor|FLT3 inhibitor|macrophage colony stimulating factor antagonist|MAP kinase inhibitor|PARP inhibitor|receptor tyrosine kinase inhibitor|STAT inhibitor|VEGFR antagonist, CSF1R|KDR|PDGFRB|FLT1|FLT3|FLT4|CSF1|KIT|PDGFRA|RET|TEK	TRUE	50	50	50	50	1.20652	50	13.7453	50	0.109925	FP	TN	FP	TN	TP	TN	TP	FP	TP					LQ		LQ		LQ
BRD-A56987319	SQ-22536	adenylyl cyclase inhibitor, ADCY1|ADCY5	TRUE	50	50	50	50	50	50	50	12.4112	19.1639	TN	TN	TN	TN	FP	TN	TN	FN	TP									LQ
BRD-K76964878	EX-527	SIRT inhibitor|SIRT pathway, SIRT1	TRUE	50	50	50	33.4352	50	50	20.5721	8.122	6.20132	TN	TN	TN	TN	TN	TN	TN	FN	TP									LQ
BRD-K61323504	SB-225002	CC chemokine receptor antagonist|Chemokine CXCR2 (IL-8 beta Receptor) Antagonists, CXCR2	TRUE	50	50	50	23.6824	50	50	50	1.50401	6.09662	TN	FP	TN	TN	TN	TN	TN	FN	TP									LQ
BRD-K17849083	tranilast	angiogenesis inhibitor|histamine receptor antagonist|histamine release inhibitor|indoleamine 2,3-dioxygenase activator|interferon gamma synthesis inhibitor|interleukin receptor modulator|interleukin synthesis enhancer|interleukin synthesis inhibitor|TGF beta receptor antagonist|TRPV antagonist|tumor necrosis factor production inhibitor|urate transporter inhibitor, HPGDS|HRH1|IDO1|IFNG|IL10|IL2|IL…	TRUE	50	50	43.8089	50	50	50	50	0.23209	0.02742	TN	FP	TN	TN	TN	TN	TN	FN	TP									LQ
BRD-A50684349	fenoldopam	dopamine receptor agonist, DRD1|ADRA1A|ADRA1B|ADRA1D|ADRA2A|ADRA2B|ADRA2C|DRD4|DRD5	TRUE	50	50	50	40.5511	50	50	50	0.597645	0.106025	TN	FP	FP	TN	TN	FP	TN	FN	TP									LQ
BRD-K03670461	tyrphostin-AG-82	EGFR inhibitor|epidermal growth factor receptor (EGFR) inhibitor|tyrosine kinase inhibitor, EGFR|LCK	TRUE	50	50	28.6153	23.264	50	50	36.5859	19.4692	1.1949	TN	FP	FP	TN	FP	FP	TN	FN	TP									LQ
BRD-K37720887	SB-525334	TGF beta receptor inhibitor, TGFBR1	TRUE	29.5295	50	50		50	50	50	16.7706	8.33272	FP	FP	FP		FP	FP	TN	FN	TP									LQ
BRD-K21680192	mitoxantrone	topoisomerase inhibitor|DNA intercalating drug|HCV inhibitor|immunosuppressant|Pim kinase inhibitor, TOP2A|PIM1	TRUE	42.15	41.5344	34.8723	50	50	50	50	0.18941	0.35618	TN	FP	FP	FP	TN	FP	TN	FN	TP									LQ
BRD-A94669766	naringenin	aromatase inhibitor|estrogen receptor agonist|quorum sensing signaling modulator|TRPM3 antagonist, CYP19A1|ESR2|CYP1B1|GLO1|HSD17B1	TRUE	50	43.3828	28.865	50	50	50	33.8885	3.23186	1.93363	TN	FP	FP	FP	TN	FP	TN	FN	TP									LQ
BRD-K93918653	quizartinib	FLT3 inhibitor|colony stimulating factor receptor inhibitor|KIT inhibitor|RET tyrosine kinase inhibitor, FLT3|CSF1R|KIT|RET|PDGFRA|PDGFRB	TRUE	50	50	50	50	50	50	42.9118	6.33551	0.13564	FP	FP	FP	FP	TN	TN	FP	TP	TP								LQ	LQ
BRD-K75295174	alisertib	Aurora kinase inhibitor|mitotic inhibitor|protein kinase inhibitor, AURKA	TRUE	50	50	50	50	50	50	50	1.24384	0.698135	FP	FP	FP	FP	TN	TN	FP	TP	TP								Q	Q
BRD-K76064317	tyrphostin-AG-1296	FLT3 inhibitor, FLT3	TRUE	50	50	50	50	50	50	10.387	2.61198	0.215275	TN	FP	TN	TN	TN	TN	TP	FN	TP							Q		LQ
BRD-K70163715	vatalanib	KIT inhibitor|PDGFR tyrosine kinase receptor inhibitor|VEGFR inhibitor|angiogenesis inhibitor|aromatase inhibitor|EGFR inhibitor|VEGFR antagonist, FLT1|FLT4|KDR|KIT|PDGFRB|CYP19A1|EGFR|PDGFRA	TRUE	50	50	50	50	50	50	0.08704	1.35642	0.27325	FP	FP	TN	TN	TN	TN	TP	TP	TP							LQ	LQ	LQ
BRD-K89162000	tandutinib	FLT3 inhibitor|KIT inhibitor|PDGFR tyrosine kinase receptor inhibitor, FLT3|KIT|PDGFRA|PDGFRB|CSF1R|PDGFD	TRUE	50	50	50	50	50	50	0.065125	1.70381	0.02286	FP	FP	TN	TN	TN	TN	TP	TP	TP							Q	LQ	Q
BRD-K53414658	tivozanib	VEGFR inhibitor|KIT inhibitor|tyrosine kinase inhibitor, FLT1|FLT4|KDR|KIT|PDGFRA|PDGFRB	TRUE	50	50	50	50	32.813	50	0.02286	0.02286	0.02286	FP	FP	FP	TN	TN	TN	TP	TP	TP							Q	Q	Q
BRD-K83963101	MLN-8054	Aurora kinase inhibitor|mitotic inhibitor|protein kinase inhibitor, AURKA	TRUE	50	50	50	20.8365	50	50	0.282755	0.12823	0.06988	FP	FP	FP	FP	FP	TN	TP	TP	TP							Q	Q	Q
BRD-K63504947	semaxanib	VEGFR inhibitor|angiogenesis inhibitor|FLT3 inhibitor|hepatocyte growth factor receptor inhibitor|vascular endothelial growth factor receptor (VEGFR) inhibitor|VEGFR antagonist, KDR|FLT1|KIT|PDGFRB|FGFR1|FLT3|MET|PDGFRA|RET	TRUE	50	50	50	50	50	50	2.33485	0.875765	0.34093	TN	FP	FP	FP	FP	FP	FN	FN	TP									L
BRD-K29905972	axitinib	VEGFR inhibitor|PDGFR tyrosine kinase receptor inhibitor|angiogenesis inhibitor|KIT inhibitor|VEGFR antagonist, KDR|FLT1|FLT4|CSF1|CYP2C19|CYP3A5|KIT|PDGFRB|PLK4	FALSE	50	50	50	50	4.50551	50	0.02286	0.030705	0.02286	FP	FP	FP	FP	FN	TN	TP	TP	TP							Q	LQ	Q
BRD-K74148702	curcumin	cyclooxygenase inhibitor|AP inhibitor|CCN expression inhibitor|DNA methyltransferase inhibitor|EGFR expression inhibitor|free radical scavenger|FtsZ inhibitor|glucose 6 phosphatase inhibitor|histone N-acetyltransferase inhibitor|HIV integrase inhibitor|lipoxygenase inhibitor|NFkB pathway inhibitor|tau aggregation inhibitor|unidentified pharmacological activity, PTGS1|PTGS2|APP|CA1|CA12|CA14|CA2|C…	FALSE	2.82759	50	50	32.5757	50	50	0.13701	12.8838	0.02286	FN	FP	FP	TN	TN	FP	TP	TP	TP							LQ		LQ
BRD-K05804044	AZ-628	RAF inhibitor, BRAF|RAF1	FALSE	0.02286	50	50	50	50	50	0.02286	0.02286	0.02286	TP	FP	TN	FP	TN	TN	TP	TP	TP	L						Q	Q	Q
BRD-K29530284	amlexanox	histamine release inhibitor|mediator release inhibitor, FGF1|IL3|S100A12|S100A13	TRUE	50	8.287	50	50	50	50	50	0.881525	8.21708	TN	TP	TN	TN	TN	FP	TN	FN	FN		LQ
BRD-K87124298	OSI-027	mTOR inhibitor, MTOR	TRUE	50	7.40645	21.0664	50	50	50	46.0526	0.1567	0.82728	TN	TP	FP	TN	TN	TN	TN	FN	TP
BRD-K80267133	aminosalicylic-acid	cyclooxygenase inhibitor, PTGS2|ALOX5|CHUK|PLA2G2E|PTGS1	TRUE	20.3013	17.5023	50	50	50	50	50	9.93753	1.68077	TN	TP	FP	TN	FP	FP	TN	FN	FN		Q
BRD-K51223576	AG-99	tyrosine kinase inhibitor, EGFR	TRUE	50	17.9906	40.4574	30.363	43.3228	50	49.556	0.146255	0.02286	TN	TP	FP	TN	FP	FP	TN	FN	TP		Q							LQ
BRD-K29983336	rondual-kinase-inhibitor	hepatocyte growth factor receptor inhibitor, MET	TRUE	50	11.0447	50	50	50	50	50	0.10485	0.04334	FP	TP	TN	TN	TN	TN	FP	TP	TP		LQ						Q	Q
BRD-K42500029	CGP-57380	MAP kinase inhibitor|MAPK-interacting kinase inhibitor, AURKB|LCK|MKNK1|MKNK2|SGK1	TRUE	20.6732	2.69383	50	33.5057	50	50	50	0.057585	0.11847	FP	TP	FP	FP	FP	FP	FP	TP	TP		Q						LQ	LQ
BRD-K68336408	tyrphostin-AG-1478	EGFR inhibitor, EGFR|MAPK14	TRUE	50	0.02286	50	50	50	50	50	0.037515	0.040035	FP	TP	FP	FP	TN	TN	FP	TP	TP		L						LQ	Q
BRD-A58767537	afatinib	EGFR inhibitor|receptor tyrosine protein kinase inhibitor|tyrosine kinase inhibitor, EGFR|ERBB2|ERBB4	TRUE	43.2965	0.02286	50	50	50	34.9149	50	0.453705	0.10032	FP	TP	FP	FP	TN	TN	FP	TP	TP		Q						Q	Q
BRD-A35869383	ibrutinib	Bruton's tyrosine kinase (BTK) inhibitor, BTK|BLK|BMX	FALSE	50	0.02286	50	50	50	50	0.49915	0.023	0.030855	FP	TP	FP	FP	TN	TN	TP	FN	FN		Q					LQ
BRD-K63923597	barasertib	Aurora kinase inhibitor|mitotic inhibitor|protein kinase inhibitor, AURKB|AURKC	FALSE	50	0.14786	50	50	50	30.0579	0.65549	0.02286	0.096885	FP	TP	TN	FP	TN	TN	TP	TP	TP		Q					L	Q	Q
BRD-K72703948	ZM-447439	Aurora kinase inhibitor, AURKA|AURKB	FALSE	50	0.02286	50	50	50	32.4734	0.2002	0.02654	0.02286	FP	TP	FP	FP	TN	TN	TP	TP	TP		Q					Q	Q	Q
BRD-K72420232	WZ-4002	EGFR inhibitor, EGFR|ERBB2	FALSE	50	0.067085	50	50	50	39.1623	18.1349	0.88609	1.27004	FP	TP	FP	FP	TN	TN	TP	TP	TP		Q					Q	L	Q
BRD-K91509126	piceatannol	syk inhibitor|cyclooxygenase inhibitor|nitric oxide synthase inhibitor|SIRT activator|tyrosinase inhibitor|tyrosine kinase inhibitor, ATP5A1|ATP5B|ATP5C1|IRF3|PTGS2|SIRT1|SYK|TYR	FALSE	29.5568	12.4184	38.8987	1.49689	50	50	3.51571	1.39757	1.11634	TN	TP	FP	FN	TN	FP	FN	FN	TP		Q
BRD-K85606544	neratinib	EGFR inhibitor|receptor tyrosine protein kinase inhibitor|tyrosine kinase inhibitor, EGFR|ERBB2|ERBB4|KDR	FALSE	50	0.02286	50	38.3367	34.3284	3.17621	50	1.21009	3.83392	FP	TP	TN	FP	TN	FN	FP	TP	TP		L						LQ	Q
BRD-K64052750	gefitinib	EGFR inhibitor, EGFR|CYP2C19	FALSE	50	0.02485	37.4047	50	50	15.8149	38.043	0.290665	0.07344	FP	TP	FP	FP	TN	FN	FP	TP	TP		L						LQ	Q
BRD-K95785537	PP-2	src inhibitor, SRC|LCK|ABL1|LYN|RIPK2	FALSE	50	0.04573	50	50	50	0.82917	50	0.02286	0.02286	FP	TP	FP	TN	FP	TP	FP	TP	TP		Q				LQ		LQ	LQ
BRD-K86930074	cediranib	VEGFR inhibitor|KIT inhibitor|angiogenesis inhibitor|VEGFR antagonist, KDR|FLT1|FLT4|KIT|PDGFRB|CSF1R|FLT3|PDGFRA	FALSE	50	0.09062	50	50	50	2.62256	0.02286	0.02286	0.02286	FP	TP	FP	FP	TN	FN	TP	TP	TP		L					Q	Q	Q
BRD-K07881437	danusertib	Aurora kinase inhibitor|growth factor receptor inhibitor|Abl kinase inhibitor|Bcr-Abl kinase inhibitor|FGFR inhibitor|mitotic inhibitor|protein kinase inhibitor|RET tyrosine kinase inhibitor, AURKA|AURKB|AURKC|FGFR1|NTRK1|RET|BCR|SLK	FALSE	27.8866	19.7607	23.3545	42.6191	50	1.2756	3.97273	0.02286	0.182785	FP	TP	FP	FP	FP	FN	TP	TP	TP		Q					Q	Q	Q
BRD-K03449891	foretinib	VEGFR inhibitor|angiogenesis inhibitor|AXL kinase inhibitor|FLT3 inhibitor|hepatocyte growth factor receptor inhibitor|KIT inhibitor|PDGFR tyrosine kinase receptor inhibitor|TIE tyrosine kinase inhibitor|tyrosine kinase inhibitor|VEGFR antagonist, KDR|MET|AXL|FLT1|FLT3|FLT4|KIT|MST1R|TEK	FALSE	50	13.229	50	50	50	12.1259	0.02286	0.02286	0.02286	FP	TP	FP	FP	FP	FN	TP	TP	TP		Q					Q	Q	Q
BRD-K12502280	TG-101348	JAK inhibitor|FLT3 inhibitor|RET tyrosine kinase inhibitor, JAK2|FLT3|BRD4|JAK1|JAK3|RET|TYK2	FALSE	50	18.9536	50	50	42.5085	2.61333	12.1701	0.08683	0.042745	FP	TP	FP	FP	FP	TP	TP	TP	TP		Q				L	Q	Q	Q
BRD-K49328571	dasatinib	KIT inhibitor|src inhibitor|Bcr-Abl kinase inhibitor|ephrin receptor inhibitor|PDGFR tyrosine kinase receptor inhibitor|yes kinase inhibitor|Abl kinase inhibitor|Bruton's tyrosine kinase (BTK) inhibitor|discoidin domain containing receptor Inhibitor|lymphocyte specific tyrosine kinase inhibitor|tyrosine kinase inhibitor, ABL1|FYN|LCK|SRC|KIT|YES1|BCR|EPHA2|LYN|PDGFRB|ABL2|BTK|DDR1|DDR2|PDGFRA|STA…	FALSE	0.07006	0.130415	50	50	50	3.17839	0.02286	0.035545	0.02286	TP	TP	FP	TN	TN	FN	TP	TP	TP	L	LQ					Q	Q	Q
BRD-K19540840	saracatinib	src inhibitor|Abl kinase inhibitor, SRC|ABL1|LCK|YES1	FALSE	6.01349	0.43716	50	50	50	3.72208	10.227	0.30156	0.044545	TP	TP	FP	FP	TN	FN	TP	TP	TP	Q	L					Q	Q	Q
BRD-A10523515	GSK-429286A	ROCK inhibitor, ROCK1	FALSE	50	1.60215	50	42.8259	0.02286	50	50	0.384195	6.81869	TN	FN	TN	TN	FN	TN	FP	FN	TP									LQ
BRD-K34581968	BMS-536924	insulin growth factor receptor inhibitor|insulin receptor ligand, IGF1R|AKT1|CCNE1|CDK2|CYP3A4|ERBB2|INSR|KDR|LCK|MAPK1|MET|PDGFRA|PDGFRB	FALSE	50	7.59884	50	31.6802	2.9102		1.78489	0.143425	0.29978	FP	TP	TN	FP	FN		TP	TP	TP		Q					Q	L	Q
BRD-K46056750	AZD-7762	CHK inhibitor, CHEK1|CHEK2	FALSE	50	0.146965	50	50	0.407485	0.255685	0.046555	0.02286	0.02286	FP	TP	FP	FP	TP	FN	TP	TP	TP		L			Q		Q	Q	Q
BRD-K51575138	TPCA-1	IKK inhibitor, IKBKB	FALSE	50	0.31236	18.8539	50	19.5642	50	7.42593	0.04204	0.03343	FP	TP	TP	FP	TP	FP	TP	TP	TP		L	L		L		LQ	Q	Q
BRD-K03063480	PF-477736	CHK inhibitor, CHEK1|CHEK2	FALSE		0.071785	16.3056	31.2776	0.646465	0.55771	0.064995	0.02286	0.02286		TP	TP	FP	TP	TP	TP	TP	TP		LQ	Q		LQ	LQ	LQ	Q	Q
BRD-A90451247	KU-60019	ATM kinase inhibitor, ATM	TRUE	50	29.9868	50	50	50	0.5916	50	50	11.1914	TN	TN	TN	FP	TN	FN	FP	FP	TP									LQ
BRD-K99616396	motesanib	KIT inhibitor|PDGFR tyrosine kinase receptor inhibitor|VEGFR inhibitor|angiogenesis inhibitor|RET tyrosine kinase inhibitor|vascular endothelial growth factor receptor (VEGFR) inhibitor|VEGFR antagonist, FLT1|FLT4|KDR|KIT|PDGFRA|RET	TRUE	50	50	50	50	50	2.39533	50	50	0.06816	FP	FP	TN	TN	TN	FN	FP	FP	TP									LQ
BRD-K11853856	PJ-34	PARP inhibitor, EEF2|PARP1|PARP15|PARP3	TRUE	50	41.7715	50	50	21.7856	2.54461	50	9.02534	3.44151	TN	FP	TN	FP	TN	FN	TN	FN	TP									LQ
BRD-K78278890	NM-PP1	calcium/calmodulin dependent protein kinase inhibitor|growth factor receptor inhibitor|MAP kinase inhibitor|mutant kinase inhibitor, CAMK2A|LCK|MAPK8|PRKACA|RIPK2|SRC	TRUE	50	50	50	50	50	1.39046	50	12.0146	11.9741	FP	FP	FP	TN	TN	FN	TN	FN	TP									L
BRD-A35033682	eriodictyol	cytochrome P450 inhibitor|TRPM3 antagonist|xanthine oxidase inhibitor, CYP1B1|NFE2L2|XDH	TRUE	50	37.7418	31.4613	21.5876	45.5041	2.29168	50	4.13849	1.56522	TN	FP	FP	TN	TN	TP	TN	FN	TP						Q			L
BRD-K09549677	mibefradil	T-type calcium channel blocker|angiogenesis inhibitor|calcium channel blocker|calcium channel inhibitor|L-type calcium channel blocker|sodium channel blocker, CACNA1G|CACNA1H|CACNA1C|CACNA1I|ANO1|CACNA1D|CACNA1F|CACNA1S|CACNB1|CACNB2|CACNB3|CACNB4|CATSPER1|CATSPER2|CATSPER3|CATSPER4|CYP3A5|CYP3A7|SCN2A|SCN4A|SCN5A|SCN9A	TRUE	50	50	50	50	50	13.6305	50	3.30736	0.03108	TN	FP	FP	TN	TN	FN	FP	FN	TP									LQ
BRD-K92428232	GSK-461364	PLK inhibitor, PLK1	TRUE	50	50	50	50	22.0903	4.40074	50	9.3632	0.10691	FP	FP	FP	TN	TN	FN	FP	TP	TP								L	Q
BRD-K16478699	PLX-4720	RAF inhibitor, BRAF|KDR	FALSE	0.02286	50	50	41.0228	50	13.2476	50	0.83168	0.07302	TP	FP	TN	FP	TN	FN	FP	TP	TP	L							LQ	LQ
BRD-K99545815	PF-562271	focal adhesion kinase inhibitor|angiogenesis inhibitor|apoptosis stimulant, PTK2|PTK2B	FALSE	50	50	0.189275	35.1752	20.1792	0.7214	50	0.651025	1.8195	FP	FP	TP	FP	FP	FN	FP	TP	TP			L					Q	Q
BRD-A29009894	AZD-1480	JAK inhibitor, JAK1|JAK2|JAK3	FALSE	50	50	12.6576	34.4782	43.6638	2.3145	37.8491	0.02286	0.247905	FP	FP	TP	FP	FP	FN	FP	TP	TP			Q					Q	Q
BRD-K56751279	Y-39983	protein kinase inhibitor|rho associated kinase inhibitor|ROCK inhibitor, ROCK1|ROCK2	FALSE	40.1698	50	9.99333	50	0.02286	0.258395	50	3.87242	0.20274	FP	TN	TP	FP	FN	FN	TN	TP	TP			LQ					LQ	LQ
BRD-K28428262	brivanib	alcohol dehydrogenase inhibitor|FGFR inhibitor|fibroblast growth factor receptor (FGFR) inhibitor|vascular endothelial growth factor receptor (VEGFR) inhibitor|VEGFR inhibitor, FGFR1|KDR|FLT1|CYP3A4|FGFR2|FGFR3|FLT4|KCNH2	FALSE	50	50	50	50	50	1.93632	0.41342	0.122955	0.205735	FP	FP	FP	FP	TN	FN	TP	FN	TP							LQ
BRD-K49075727	nintedanib	FGFR inhibitor|PDGFR tyrosine kinase receptor inhibitor|VEGFR inhibitor|angiogenesis inhibitor|lymphocyte specific tyrosine kinase inhibitor|src inhibitor|tyrosine kinase inhibitor|VEGFR antagonist, FLT1|FLT4|KDR|PDGFRA|FGFR1|FGFR3|PDGFRB|FGFR2|FGFR4|LYN	FALSE	50	50	18.525	50	50	1.35383	0.02286	0.02286	0.02286	FP	FP	TP	TN	TN	FN	TP	TP	TP			LQ				Q	Q	Q
BRD-K06543683	bisindolylmaleimide-ix	PKC inhibitor|glycogen synthase kinase inhibitor|leucine rich repeat kinase inhibitor|SIRT inhibitor, SIRT1|AKT1|GSK3B|LCK|LRRK2|MAPK1|MAPK11|MAPK12|MAPK14|MAPK8|PRKCA|ROCK1|RPS6KB1|SIRT2	FALSE	50	50	1.09922	50	50	0.1498	3.36909	0.158295	0.16348	FP	FP	TP	FP	TN	TP	TP	TP	TP			Q			Q	LQ	LQ	LQ
BRD-K99291625	SB-203580	p38 MAPK inhibitor|calcium channel activator|interleukin inhibitor|stress activated protein kinase inhibitor, MAPK14|MAPK1|MAPK11|AKT1|ALOX5|CHEK1|CYP2D6|CYP3A4|GAK|GSK3B|LCK|MAPK10|MAPK12|MAPK8|MAPK9|PRKCA|RAF1|RIPK2|ROCK1|RPS6KB1|SGK1|SRC|TNF	FALSE	0.151425	50	0.723655	50	6.30765	0.28046	50	0.194545	0.12662	TP	TN	FN	TN	TP	FN	TN	FN	FN	Q				LQ
BRD-A78322124	dobutamine	adrenergic receptor agonist, ADRB1|ADRB2|ADRA1A	FALSE	15.7068	50	11.173	35.7639	1.04042	0.07328	50	1.16355	0.114555	FN	FP	TP	TN	FN	TP	TN	FN	FN			L			Q
BRD-K54330070	SB-202190	p38 MAPK inhibitor|interleukin inhibitor|stress activated protein kinase inhibitor, MAPK14|AKT1|ALOX5|CHEK1|GSK3B|LCK|MAPK1|MAPK11|MAPK12|MAPK8|PRKCA|ROCK1|RPS6KB1|SGK1	FALSE	0.048465	6.87202	0.372495	50	11.0984	2.84802	50	0.23107	0.49611	TP	TP	TP	TN	TP	FN	FP	FN	FN	L	LQ	LQ		Q
BRD-A35338386	NECA	adenosine receptor agonist, ADORA1|ADORA2A|ADORA2B|ADORA3|HSP90B1	TRUE	50	50	3.22575	50	50	50	50	21.1007	10.7071	TN	TN	TP	TN	TN	TN	TN	TN	FN			LQ
BRD-K88560311	rucaparib	PARP inhibitor, PARP1|PARP2	TRUE	50	24.4322	10.8199	32.4213	50	50	50	50	10.0885	FP	TN	TP	FP	TN	TN	TN	TN	FN			LQ
BRD-K16189898	CHIR-99021	glycogen synthase kinase inhibitor, CDK1|GSK3A|GSK3B|MAPK1	TRUE	50	50	0.02286	29.589	50	50	50	50	1.00804	TN	FP	TP	FP	TN	TN	FP	TN	FN			LQ
BRD-K84085265	CG-930	JNK inhibitor, MAPK8	TRUE	50	35.6098	13.211	50	50	50	50	40.0789	12.4313	FP	FP	TP	FP	TN	TN	FP	FP	TP			LQ						Q
BRD-A09467419	mebeverine	acetylcholine receptor antagonist, CHRM1|CHRM2|CHRM3|CHRM4	TRUE	50	50	17.3973	50	50	50	50	6.89762	3.01473	TN	TN	FN	TN	TN	TN	TN	FN	TP									LQ
BRD-K91900765	VX-745	p38 MAPK inhibitor, MAPK14|MAPK11|MAPK12	TRUE	50	40.011	0.02286	50	50	50	50	1.87174	0.092535	TN	TN	TP	TN	FP	FP	TN	FN	FN			LQ
BRD-K11590034	morin	antioxidant, ADORA2A|CYP1A2|ESR2|FASN|MCL1|SLC22A12	FALSE	50	0.51805	12.667	29.4823	50	50	37.2536	2.41962	1.04183	TN	TP	TP	FP	TN	FP	TN	FN	TP		L	Q						LQ
BRD-K87909389	alvocidib	CDK inhibitor|apoptosis stimulant|BCL inhibitor|cell cycle inhibitor|MCL1 inhibitor|survivin inhibitor|XIAP inhibitor, CDK2|CDK4|CDK1|CDK6|CDK7|CDK9|CDK5|CDK8|EGFR|PYGM|BCL2|BIRC5|CCNT1|MCL1|XIAP	FALSE	50	10.4475	0.133165	0.02286	29.0093	30.03	50	1.38529	0.715315	TN	FN	TP	FN	TN	TN	TN	FN	TP			LQ						LQ
BRD-K94649603	taxifolin	apolipoprotein secretion inhibitor|beta amyloid aggregation inhibitor|cholesterol biosynthesis inhibitor|HMGCR inhibitor|NFkB pathway modulator|opioid receptor antagonist|reverse transcriptase inhibitor, APOB|APP|HMGCR	FALSE	50	19.6	8.08746	5.75596	50	50	22.5625	0.849295	0.876585	TN	TP	TP	FN	TN	FP	TN	FN	TP		Q	Q						LQ
BRD-K41564320	purvalanol-b	tyrosine kinase inhibitor, CDK2|CDK4|MAPK1|MAPK3|CDK5|SRPK2	TRUE	50	49.3517	50	17.1704	50	50	50	0.80746	0.765865	FP	FP	FP	TP	TN	TN	FP	TP	TP				LQ				Q	Q
BRD-K23984367	sorafenib	RAF inhibitor|FLT3 inhibitor|KIT inhibitor|PDGFR tyrosine kinase receptor inhibitor|RET tyrosine kinase inhibitor|VEGFR inhibitor|angiogenesis inhibitor|VEGFR antagonist, RET|BRAF|FLT3|KDR|RAF1|FLT1|FLT4|KIT|DDR2|FGFR1|PDGFRB|CYP2B6|CYP2C8|CYP3A5|PDGFB|SLCO1B3	TRUE	50	50	50	19.3467	40.2869	50	50	0.02286	0.02286	FP	FP	FP	TP	TN	TN	FP	TP	TP				LQ				Q	Q
BRD-K95435023	PHA-665752	c-Met inhibitor|hepatocyte growth factor receptor inhibitor, MET	FALSE	50	50	50	0.69484	20.4428	1.06278	50	0.03724	0.080165	TN	FP	FP	TP	TN	TP	TN	TP	TP				LQ		LQ		Q	Q
BRD-K51313569	palbociclib	CDK inhibitor, CDK4|CDK6|CCND3	FALSE	50	50	25.863	0.02286	50	19.5002	50	2.03206	2.63924	FP	FP	FP	TP	TN	FN	FP	TP	TP				LQ				LQ	LQ
BRD-K50836978	purvalanol-a	CDK inhibitor|dual specificity tyrosine-(Y)-phosphorylation regulated kinase inhibitor, CDK1|CDK2|CDK4|CDK5|CCND1|CCNE1|CSNK1G3|RPS6KA1|SRC	FALSE	50	50	50	0.84748	50	2.64507	50	0.115345	0.58845	FP	FP	FP	TP	TN	TP	FP	TP	TP				LQ		LQ		Q	Q
BRD-K73991644	isoquercetin	aldose reductase inhibitor|falcipain inhibitor, AKR1B1|ACE	FALSE	50	50	8.67567	5.48352	50	50	50	3.75914	2.01783	TN	FP	TP	FN	TN	FP	TN	FN	FN			Q
BRD-K43149758	myricetin	androgen receptor ligand|cytochrome P450 inhibitor, PIK3CG|AR|CYP3A4	FALSE	50	50	0.194935	0.26137	30.7215	50	50	16.9347	1.2479	TN	FP	TP	FN	TN	FP	TN	FN	TP			Q						LQ
BRD-K97399794	quercetin	aldose reductase inhibitor|cytokine production inhibitor|EGFR inhibitor|glucosidase inhibitor|monoamine oxidase inhibitor|polar auxin transport inhibitor|quorum sensing signaling modulator|SIRT activator|sodium channel blocker|tyrosine phosphatase inhibitor|xanthine oxidase inhibitor, PIK3CG|AKR1B1|ATP5A1|ATP5B|ATP5C1|CYP2C8|EGFR|GAA|HCK|HIBCH|MAOA|PIM1|PTPN1|SCN5A|SIRT1|STK17B|UGT3A1|XDH	FALSE	50	50	0.411355	0.44642	33.4017	50	50	0.074175	0.07699	TN	FP	TP	TP	TN	FP	FP	FN	TP			Q	LQ					LQ
BRD-K54256913	MK-1775	wee1 kinase inhibitor, WEE1	FALSE	50	24.4226	18.8568	0.123275	50	0.49439	50	1.61508	0.66669	FP	FP	TP	TP	FP	FN	FP	TP	TP			Q	L				L	L
BRD-K76805682	SB-415286	glycogen synthase kinase inhibitor, GSK3B|GSK3A|RPS6KB1	FALSE		50	0.489015	4.88488	50	5.73705	50	0.774265	7.92886		FP	TP	TP	FP	TP	FP	TP	TP			Q	Q		Q		LQ	LQ
BRD-K30189597	SYK-inhibitor	syk inhibitor, SYK	FALSE	50	50	50	8.49095	0.14142		50	0.02286	0.02286	FP	FP	FP	TP	TP		FP	TP	TP				Q	Q			LQ	Q
BRD-K12807006	kaempferol	cyclooxygenase inhibitor|estrogen-related receptor inverse agonist|JAK inhibitor|quorum sensing signaling modulator|STAT inhibitor|xanthine oxidase inhibitor, AKR1B1|ALOX15B|ALOX5|AR|CYP1B1|ESRRA|ESRRG|GLO1|HSD17B1|JAK3|PTGS1|STAT6|UGT3A1|XDH	FALSE	50	50	0.02286	4.75697	9.07207	35.4681	50	0.02286	0.0239	TN	FP	TP	FN	FN	TN	TN	FN	FN			Q
BRD-K38615104	A-443644	AKT inhibitor, AKT1|AKT2|AKT3|CDC42BPB|GSK3B|PHKG1|PKIA|PRKACA	FALSE	50	50	0.107435	1.55587	0.02286	0.02286	50	0.56536	0.09234	FP	FP	TP	TP	TP	TP	TN	TP	TP			L	Q	LQ	Q		LQ	LQ
BRD-K50199947	WH-4023	src inhibitor, ABL1|LCK|SRC	FALSE		50	50	2.6538	50	50	9.4568	0.02286	0.04656		FP	FP	TP	TN	TN	TP	TP	TP				Q			Q	Q	Q
BRD-K68174511	torin-2	mTOR inhibitor, MTOR	FALSE	50	50	16.3626	6.18183	50	29.3783	2.19701	0.23035	0.107515	TN	TN	TP	FN	TN	TN	FN	FN	FN			LQ
BRD-K84955386	hyperoside	glucosidase inhibitor|free radical scavenger, ACE|AKR1B1|GAA	FALSE	28.4086	50	3.98179	0.899485	50	50	10.6452	1.60645	3.4743	TN	FP	TP	FN	TN	FP	FN	FN	FN			Q
BRD-K07888196	tyrphostin-AG-538	insulin growth factor receptor inhibitor|tyrosine kinase inhibitor, EGFR	FALSE	50	50	1.24551	0.6784	50	50	10.5044	0.901465	0.077945	TN	FP	TP	FN	FP	FP	FN	FN	TP			Q						LQ
BRD-K19136521	indirubin	CDK inhibitor|glycogen synthase kinase inhibitor|cyclin-dependent kinase inhibitor|PKC inhibitor, CDK1|CDK5|CCNE1|CDK2|CDK4|CDK5R1|CDK9|GSK3A|GSK3B|LCK|LRRK1|LRRK2	FALSE	50	50	0.348395	0.235805	50	50	1.15925	0.060105	0.462125	TN	FP	TP	TP	FP	FP	TP	TP	TP			Q	Q			Q	Q	Q
BRD-K53281329	SYK-inhibitor	syk inhibitor, SYK	FALSE	50	28.695	0.0594	50	0.063045	0.078865	0.28574	0.23635	0.02286	FP	FP	TP	FP	TP	FN	TP	TP	TP			Q		Q		LQ	LQ	LQ
BRD-K70549064	staurosporine	PKC inhibitor|AKT inhibitor|BMX inhibitor|CDK inhibitor|CHK inhibitor|G protein coupled receptor agonist|glycogen synthase kinase inhibitor|leucine rich repeat kinase inhibitor|ribosomal protein inhibitor|sodium/hydrogen exchanger inhibitor, CDK2|GSK3B|CAMK2B|CDK1|CDK5|CHEK1|CHRM1|CHRM2|CHRM4|CSK|DAPK1|GPR35|IKBKB|ITK|LCK|LRRK2|MAP2K4|MAP2K6|MAPKAPK2|PAK2|PDPK1|PHKG2|PIK3CG|PIM1|PKN1|PRKACB|PRKCI…	FALSE	50	50	0.02286	0.02286	0.02286	0.02286	0.02286	0.02286	0.02286	FP	FP	FN	FN	FN	FN	TP	FN	FN							LQ
BRD-K17953061	staurosporine	PKC inhibitor|AKT inhibitor|BMX inhibitor|CDK inhibitor|CHK inhibitor|G protein coupled receptor agonist|glycogen synthase kinase inhibitor|leucine rich repeat kinase inhibitor|ribosomal protein inhibitor|sodium/hydrogen exchanger inhibitor, CDK2|GSK3B|CAMK2B|CDK1|CDK5|CHEK1|CHRM1|CHRM2|CHRM4|CSK|DAPK1|GPR35|IKBKB|ITK|LCK|LRRK2|MAP2K4|MAP2K6|MAPKAPK2|PAK2|PDPK1|PHKG2|PIK3CG|PIM1|PKN1|PRKACB|PRKCI…	FALSE		50	0.02286	0.02286	0.02286	0.02286	0.02286	0.02286	0.02286		FP	TP	TP	FN	FN	FN	TP	FN			L	LQ				L
BRD-K31342827	bisindolylmaleimide	CDK inhibitor|PKC inhibitor|leucine rich repeat kinase inhibitor, CCND1|CDK4|LRRK2|PDPK1|PIM1|PRKCA|PRKCB|PRKCI|PRKCZ	FALSE	50	48.4806	0.139835	1.06104	0.95894	0.02286	5.15602	0.780085	0.065365	TN	FP	TP	TP	FN	FN	TP	TP	TP			Q	LQ			LQ	LQ	LQ
BRD-K23192422	lestaurtinib	FLT3 inhibitor|growth factor receptor inhibitor|JAK inhibitor|apoptosis stimulant, FLT3|NTRK1|JAK2|NTRK2|NTRK3	FALSE	50	50	0.12575	0.02286	0.063055	0.02286	0.06434	0.02286	0.02286	FP	FP	TP	TP	FN	TP	TP	TP	TP			Q	LQ		LQ	LQ	LQ	LQ
BRD-K54233340	dorsomorphin	AMPK inhibitor|DNA damaging|TGF beta receptor inhibitor, ACVR1|BMPR1A|BMPR1B|EPHA2|FKBP1A|FLT1|FLT3|KDR|LCK|MKNK1|PRKAA1|RPS6KA1|SRC	FALSE	6.93656	47.2942	18.3649	0.128405	1.72213	4.17053	0.030245	0.02286	0.02286	TP	FP	TP	FN	TP	FN	TP	TP	TP	LQ		LQ		LQ		LQ	Q	LQ
BRD-K08619574	thioproperazine	dopamine receptor antagonist, ADRA1A|ADRA1B|DRD1|DRD2|HTR1A|HTR2A	TRUE	50	50	50	50	50	4.78638	50	50	50	TN	TN	TN	TN	TN	TP	FP	TN	TN						LQ
BRD-K00234327	RU-24969	serotonin receptor agonist, HTR1A|HTR1B|HTR6|HTR1D|HTR2A|HTR2B|HTR2C|HTR5A	TRUE	50	50	50	50	44.0978	12.6169	50	50	47.5252	TN	TN	FP	FP	FP	TP	TN	TN	TN						LQ
BRD-K92093830	doxorubicin	topoisomerase inhibitor|DNA intercalating drug, TOP2A	TRUE	50	50	50	44.8558	37.8261	0.15918	50	50	41.0814	TN	FP	FP	FP	TN	TP	TN	FP	FP						LQ
BRD-K10852020	tolcapone	catechol O methyltransferase inhibitor|transthyretin amyloid inhibitor, COMT|TTR	TRUE	50	50	50	4.69446	47.3722	5.15803	50	50		TN	FP	FP	FN	TN	TP	TN	TN							Q
BRD-K06426971	ryuvidine	histone lyinse methyltransferase inhibitor, CDK4|CDK2	TRUE	50	50	50	0.38833	50	2.77878	50	50	10.4231	FP	FP	FP	TP	FP	FN	TN	TN	TP				LQ					LQ
BRD-K72726508	arcyriaflavin-a	CDK inhibitor, CCND1|CCNE1|CDK2|CDK4	FALSE	50	50	50	3.45289	14.9842	5.23557	50	38.1552	0.02286	TN	FP	FP	TP	TP	TP	FP	FP	TP				Q	Q	Q			Q
BRD-K19295594	gossypol	BCL inhibitor|MCL1 inhibitor|11-beta hydroxysteroid dehydrogenase inhibitor|growth factor receptor modulator|lipid peroxidase inhibitor, BCL2|BCL2L1|MCL1|BCL2L2|CTGF|EGF	FALSE		50	0.176325	0.391825	50	0.43497	50	50	12.8888		FP	TP	TP	TN	TP	TN	TN	FN			Q	LQ		Q
BRD-K01253243	SB-590885	RAF inhibitor, BRAF	FALSE	0.02286	8.8377	21.3463	34.6628	32.3464	1.07275	50	50	0.93258	TP	TP	TN	TN	TN	TP	TN	TN	FN	LQ	LQ				L
BRD-A55913614	primaquine	antimalarial agent|DNA inhibitor, KRT7|NQO2	FALSE	13.7089	0.02286	50	2.34801	50	17.1053	50	30.679	0.929165	FN	FN	TN	FN	TN	TP	TN	TN	FN						LQ
BRD-K08502430	angiogenesis-inhibitor	angiogenesis inhibitor, EGFR	TRUE	50	50	50	0.36978	6.81468	50	50	50	50	TN	FP	FP	TP	TP	FP	FP	TN	TN				Q	LQ
BRD-K01567962	pyrazolanthrone	JNK inhibitor|AP inhibitor|dual specificity protein kinase inhibitor|leucine rich repeat kinase inhibitor, MAPK10|MAPK8|MAPK9|TTK|LRRK2|MAPK8IP1	TRUE	50	50	50	13.9494	4.69938		50	0.12377		TN	FP	FP	TP	TP		FP	TP					Q	LQ			Q
BRD-K30197592	5-methoxytryptamine	serotonin receptor agonist, HTR2A|HTR6|HTR1B|HTR1D|HTR1E|HTR1F|HTR2C|HTR4|HTR7|TRPM8	TRUE	50	50	50	50	8.19084	50	34.4953	50	50	TN	FP	FP	FP	TP	TN	TN	TN	TN					LQ
BRD-K93201660	ML-7	myosin light chain kinase inhibitor, MYLK	TRUE	50	50	50	50	15.6997	14.9555	50	50	50	TN	TN	TN	TN	FN	TP	TN	TN	TN						L
BRD-A55756846	H-7	PKA inhibitor, PKIA|PRKACA|PRKAR1A	TRUE	50	50	50	50	0.28642	4.87831	50	50	50	TN	TN	FP	FP	TP	TP	FP	TN	TN					Q	LQ
BRD-K97752965	nicorandil	ATP channel activator|nitric oxide donor|potassium channel agonist, ABCC9|KCNJ11|KCNJ8	TRUE	50	50	50	50	2.75309	0.64338	50	50	33.0556	TN	FP	TN	TN	TP	FN	TN	TN	FP					LQ
BRD-K31843556	T-0070907	PPAR receptor anatagonist|PPAR receptor antagonist, PPARG	TRUE	50	50	50	50	0.31177	6.81464	50	50	50	TN	FP	TN	TN	TP	FN	TN	FP	FP					LQ
BRD-A42335949	alexidine	CC chemokine receptor antagonist|phosphatidylglycerophosphatase inhibitor|protein-tyrosine phosphatase inhibitor, CXCR4	FALSE	50	12.9449	50	2.39588	13.1973	1.64699	50	50	50	TN	TP	TN	FN	FN	TP	TN	TN	TN		LQ				LQ
BRD-K76617868	fasudil	ROCK inhibitor|calcium sensitizer|PKA inhibitor|protein kinase inhibitor|rho associated kinase inhibitor, ROCK1|ROCK2|PKIA|PRKACA	TRUE	50	50	50	50	0.21874	21.5439	50	50	11.6647	TN	FP	FP	FP	TP	FP	TN	TN	FN					Q
BRD-K27737647	H-89	AKT inhibitor|cAMP dependent protein kinase inhibitor|PKA inhibitor|voltage-gated potassium channel blocker, PRKACA|GSG2|KCNA2|KCNA3|KCNA5|KCNAB2|KCNC1|KCNC2|KCNC3|KCNE1|KCNE2|KCNE3|KCNE4|KCNH1|KCNH2|KCNQ1|KCNQ2|KCNQ3|KCNQ5|KCNS3|PKIA	TRUE	50	50	50	50	0.02286	1.32408	50	47.7933	0.397905	TN	TN	FP	TN	TP	FN	TN	TN	FN					LQ
BRD-K70577657	H-9	cAMP dependent protein kinase inhibitor|PKA inhibitor, PRKACA	FALSE	50	18.5406	50	50	0.53493	11.4309	50	47.7991	8.97294	TN	FN	FP	FP	TP	TP	TN	TN	TP					Q	LQ			L
BRD-K77793136	hydroxyfasudil	ROCK inhibitor, ROCK1|PKIA|PRKACA|ROCK2	FALSE	50	50	50	50	0.085185	15.9977	50	10.0864	0.59298	TN	FP	TN	FP	FN	TP	TN	FN	FN						LQ
BRD-K18742343	H-8	PKA inhibitor, PKIA|PRKACA	FALSE	50	50	35.0706	43.1805	0.390585	0.23001	50	2.92408	0.24569	TN	TN	TN	FP	TP	TP	TN	FN	FN					Q	LQ
BRD-K23875128	RHO-kinase-inhibitor-III[rockout]	ROCK inhibitor, IMPDH2|ROCK1	FALSE	50	50	50	50	1.42193	0.603615	50	7.99287	1.63085	FP	FP	FP	FP	TP	TP	FP	FN	TP					Q	Q			LQ
BRD-K31283835	tofacitinib	JAK inhibitor|disease modifying antirheumatic drug|immunosuppressant|MAP kinase inhibitor|tyrosine kinase inhibitor, JAK3|JAK1|JAK2|CYP2C19|TYK2	FALSE	50	50	47.6737	50	1.12139	3.19934	50	7.61924	3.18117	TN	TN	TN	TN	TP	FN	TN	TP	FN					LQ			LQ
BRD-K20285085	fostamatinib	syk inhibitor|FLT3 inhibitor, SYK|FLT3|RET	FALSE	37.9794	50	50	50	2.69974	0.226255	21.6643	0.04308	0.02286	FP	FP	FP	FP	TP	FN	FP	TP	TP					LQ			Q	Q
BRD-K79930101	GW-583340	EGFR inhibitor|epidermal growth factor receptor (EGFR) inhibitor|ErbB2 tyrosine kinase inhibitor|receptor tyrosine protein kinase inhibitor, EGFR|ERBB2	FALSE	50	37.5423	50	50	2.12768	0.18191	50	4.79488	0.096125	FP	FP	FP	FP	FN	FN	FP	TP	TP								LQ	LQ
BRD-K14618467	IKK-16	IKK inhibitor, IKBKB	FALSE	50	50		50	0.28074	0.104535	50	0.4416	0.02286	FP	FP		FP	FN	TP	FP	TP	TP						LQ		Q	Q
BRD-K07762753	aminopurvalanol-a	CDK inhibitor|tyrosine kinase inhibitor, CDK1|CDK2|CDK5|CDK6	FALSE	50	50	50	1.08543	8.17981	3.89415	41.194	0.07844	0.14317	FP	FP	FP	TP	FN	FN	FP	TP	TP				L				Q	Q
BRD-K72414522	AZD-5438	CDK inhibitor, CCNB1|CCNE1|CDK1|CDK2|KCNH2	FALSE	50	50	50	0.117355	11.9109	0.88898	50	0.090975	0.094685	FP	FP	FP	TP	FN	FN	FP	TP	TP				Q				Q	Q
BRD-K78431006	crizotinib	ALK tyrosine kinase receptor inhibitor|c-Met inhibitor|hepatocyte growth factor receptor inhibitor|tyrosine kinase inhibitor, ALK|MET|CYP2B6|CYP3A5|MST1R|ROS1	FALSE	49.0072	50	50	18.9002	8.40038	2.02621	50	0.09492	0.10521	FP	FP	FP	TP	TP	TP	FP	TP	TP				LQ	LQ	LQ		Q	Q
BRD-K47983010	BX-795	IKK inhibitor|PDK1 inhibitor|phosphoinositide dependent kinase inhibitor|serine/threonine kinase inhibitor|TBK1 inhibitor, PDPK1|CDK2|CHEK1|GSK3B|IKBKE|KDR|PDK1|TBK1	FALSE	50	50	50	0.038195	0.094455	0.44235	50	0.02286	0.02286	FP	FP	FP	TP	TP	TP	FP	TP	TP				Q	LQ	LQ		Q	Q
BRD-K50140147	NVP-TAE684	ALK tyrosine kinase receptor inhibitor|ALK tyrosine kinase receptor mutant inhibitor|leucine rich repeat kinase inhibitor, ALK|INSR	FALSE	50	3.90756	50	3.41499	0.53102	2.06316	20.6071	0.180985	0.543055	FP	TP	FP	TP	FN	FN	FP	TP	TP		Q		L				Q	Q
BRD-K40738845	BMS-777607	AXL kinase inhibitor|FLT3 inhibitor|hepatocyte growth factor receptor inhibitor|macrophage stimulating receptor inhibitor|tyrosine kinase inhibitor|tyrosine kinase receptor inhibitor, MET|AXL|MERTK|MST1R|TYRO3|FLT3	FALSE	50	50	50	0.973275	1.41161	3.58737	0.02286	0.02286	0.02286	FP	FP	FP	TP	FN	FN	TP	TP	TP				LQ			Q	Q	Q
BRD-K02965346	SU-11274	hepatocyte growth factor receptor inhibitor|tyrosine kinase inhibitor, MET	FALSE	50	50	50	16.8969	5.91857	1.55643	0.0929	0.06915	0.099565	TN	FP	FP	TP	TP	TP	TP	TP	TP				LQ	LQ	LQ	Q	Q	Q
BRD-K99964838	bosutinib	src inhibitor|Abl kinase inhibitor|Bcr-Abl kinase inhibitor|apoptosis stimulant|STAT inhibitor, ABL1|SRC|BCR|CAMK2G|LYN|CAMK1D|CDK2|FRK|FYN|HCK|MAP2K1|MAP2K2|MAP3K2|MAP4K5|STK10|STK24|STK4|TNK2|TXK	FALSE	33.4549	0.163075	50	11.4984	2.64114	0.409465	2.93623	0.152895	0.02286	FP	TP	FP	TP	FN	TP	TP	TP	TP		Q		LQ		LQ	Q	Q	Q
BRD-K85402309	dovitinib	EGFR inhibitor|FGFR inhibitor|FLT3 inhibitor|PDGFR tyrosine kinase receptor inhibitor|VEGFR inhibitor|angiogenesis inhibitor|FGFR antagonist|KIT inhibitor|VEGFR antagonist, EGFR|FGFR3|PDGFRB|CSF1R|FGFR1|FGFR2|FLT1|FLT3|FLT4|INSR|KDR|KIT|PDGFRA	FALSE	50	5.10934	50	7.101	12.5324	6.76112	0.04551	0.02286	0.02286	FP	TP	FP	TP	FN	TP	TP	TP	TP		LQ		L		LQ	Q	Q	Q
BRD-K77286328	reversine	Aurora kinase inhibitor|adenosine receptor antagonist, AURKB|ADORA3|AURKA|INCENP|MAP2K1	FALSE	50	0.90295	50	0.45304	0.430675	0.31681	0.4024	0.082155	0.071025	FP	TP	FP	TP	TP	FN	TP	TP	TP		Q		Q	LQ		Q	Q	Q
BRD-K89210380	biotin	vitamin cofactor for many metabolic reactions, ACACA|ACACB|HLCS|MCCC1|MCCC2|PC|PCCA|PCCB|SLC5A6	FALSE	0.05551	0.154515	50	0.0547	0.736315	0.241305	0.048535	0.09989	0.1162	FN	TP	TN	FN	FN	TP	FN	FN	TP		L				LQ			LQ
BRD-K44227013	ponatinib	Bcr-Abl kinase inhibitor|FLT3 inhibitor|PDGFR tyrosine kinase receptor inhibitor|Abl kinase inhibitor|angiogenesis inhibitor|angiopoietin inhibitor|FGFR antagonist|FGFR inhibitor|KIT inhibitor|RET tyrosine kinase inhibitor|TIE tyrosine kinase inhibitor|VEGFR inhibitor, ABL1|BCR|FLT3|RET|FGFR1|FGFR2|FGFR3|FGFR4|KIT|TEK|CYP2C8|CYP3A5|FGF2|FLT1|KDR|LCK|LYN|PDGFRA|SRC	FALSE	0.02286	12.8202	50	4.07334	1.4206	3.69974	0.02286	0.02286	0.02286	TP	TP	FP	TP	TP	FN	TP	TP	TP	Q	L		LQ	LQ		Q	Q	Q
BRD-K11636097	JNJ-7706621	CDK inhibitor|Aurora kinase inhibitor, CDK1|CDK2|AURKA|AURKB	FALSE	16.9161	16.5656	0.108125	0.1756	0.30872	0.52849	6.26177	0.160215	0.07593	TP	TP	TP	TP	TP	TP	TP	TP	TP	Q	LQ	Q	Q	LQ	LQ	Q	Q	Q
