# Supplementary material for: Drug target prediction through deep learning functional representation of gene signatures
Source: Research Square preprint supplement (doi:10.21203/rs.3.rs-3371688/v1), 2023-09-28
Supplement: Supplementary file 6 [file 7d9f8b318958414279a4f978.xlsx]

## Sheet: Table S6.AhR Confirmation
QueryPertID	cpd_name	cpd_broad	AhR agonist:IC50	AhR antagonist:IC50	CTG counter:IC50	Category based on activities	Category based on validation	Probability_L	Probability_Q	Probability_LQ
BRD-K77677632	SB-200646	serotonin receptor antagonist, HTR2B|HTR2C	0.2234	13.76	50	Agonist and/or Antagonist without cytotox		0.2917	0.7873	0.8662
BRD-K95655893	MAZ-51	VEGFR inhibitor, FLT4	0.3387	35.17	50	Agonist and/or Antagonist without cytotox		0.4891	0.7312	0.8486
BRD-K60298136	ITE	aryl hydrocarbon receptor agonist|aryl hydrocarbon receptor ligand, AHR	0.751	47.37	50	Agonist and/or Antagonist without cytotox	Known	0.4089	0.7696	0.8808
BRD-K62810658	PD-98059	MEK inhibitor|MAP kinase inhibitor, MAP2K1|AKT1|CHEK1|GSK3B|LCK|MAP2K2|MAPK1|MAPK11|MAPK12|MAPK14|MAPK3|MAPK8|PRKCA|RAF1|ROCK1|RPS6KB1|SGK1	0.7913	2.951	50	Agonist and/or Antagonist without cytotox		0.4501	0.7221	0.8157
BRD-K00662280	CL-218872	GABA receptor agonist, GABRA1|GABRA2|GABRA3|GABRA5|GABRB2|GABRG2	1.181	16.35	50	Agonist and/or Antagonist without cytotox		0.5574	0.7043	0.8312
BRD-K14807180	SB-221284	serotonin receptor antagonist, HTR2B|HTR2C|HTR2A	1.728	50	50	Agonist and/or Antagonist without cytotox		0.3765	0.7946	0.9064
BRD-K09537769	NU-7026	DNA dependent protein kinase inhibitor|mTOR inhibitor|PI3K inhibitor, PRKDC	2.213	41.19	50	Agonist and/or Antagonist without cytotox	pQSAR	0.3892	0.8242	0.9427
BRD-A30815329	felodipine	calcium channel blocker|L-type calcium channel blocker, CACNA1C|CACNA1D|CACNA1H|CACNA1S|CACNA2D1|CACNA2D2|CACNB2|CALM1|CFTR|NR3C2|PDE1A|PDE1B|TNNC1|TNNC2	3.876	40.83	50	Agonist and/or Antagonist without cytotox	pQSAR	0.4264	0.8271	0.9511
BRD-A17428743	BW-723C86	serotonin receptor agonist, HTR2B|HTR2A|HTR2C	4.184	50	50	Agonist and/or Antagonist without cytotox	pQSAR	0.5557	0.8279	0.967
BRD-K50214219	CS-1657	PARP inhibitor, PARP1	4.928	50	50	Agonist and/or Antagonist without cytotox	pQSAR	0.2842	0.8118	0.9028
BRD-K37846922	3,3'-diindolylmethane	androgen receptor antagonist|aryl hydrocarbon receptor agonist|beta glucuronidase inhibitor|CHK inhibitor|cytochrome P450 activator|indoleamine 2,3-dioxygenase inhibitor, AHR|AR|CYP1A2|GUSB|IDO1	4.998	50	50	Agonist and/or Antagonist without cytotox	Known	0.2388	0.892	0.976
BRD-K72726508	arcyriaflavin-a	CDK inhibitor, CCND1|CCNE1|CDK2|CDK4	5.297	50	50	Agonist and/or Antagonist without cytotox	pQSAR	0.3285	0.8256	0.9324
BRD-K21283037	riluzole	glutamate release inhibitor|dopamine receptor agonist|glutamate receptor antagonist|potassium channel blocker|Sodium Channel Blockers|sodium channel blocker, KCND3|KCNK10|KCNK2|KCNK4|KCNN4|SCN5A|SLC7A11	5.997	50	50	Agonist and/or Antagonist without cytotox		0.4262	0.7622	0.8753
BRD-K63750851	mycophenolic-acid	dehydrogenase inhibitor|immunosuppressant|IMPDH inhibitor|inosine monophosphate dehydrogenase inhibitor, IMPDH1|IMPDH2	6.38	50	50	Agonist and/or Antagonist without cytotox		0.2905	0.7936	0.8764
BRD-K11853856	PJ-34	PARP inhibitor, EEF2|PARP1|PARP15|PARP3	7.282	46.08	50	Agonist and/or Antagonist without cytotox		0.5195	0.7037	0.8132
BRD-K97399794	quercetin	aldose reductase inhibitor|cytokine production inhibitor|EGFR inhibitor|glucosidase inhibitor|monoamine oxidase inhibitor|polar auxin transport inhibitor|quorum sensing signaling modulator|SIRT activator|sodium channel blocker|tyrosine phosphatase inhibitor|xanthine oxidase inhibitor, PIK3CG|AKR1B1|ATP5A1|ATP5B|ATP5C1|CYP2C8|EGFR|GAA|HCK|HIBCH|MAOA|PIM1|PTPN1|SCN5A|SIRT1|STK17B|UGT3A1|XDH	8.186	9.092	50	Agonist and/or Antagonist without cytotox	pQSAR	0.4065	0.8427	0.9606
BRD-K92428153	mycophenolate-mofetil	dehydrogenase inhibitor|hydroxycarboxylic acid receptor agonist|immunosuppressant|IMPDH inhibitor|inosine monophosphate dehydrogenase inhibitor, IMPDH1|IMPDH2|HCAR2	8.201	50	50	Agonist and/or Antagonist without cytotox		0.5289	0.6987	0.8082
BRD-K16664969	GTP-14564	FLT3 inhibitor|tyrosine kinase receptor inhibitor, FLT3|CSF1R|KIT|PDGFRB	8.875	46.5	50	Agonist and/or Antagonist without cytotox	pQSAR	0.2839	0.8494	0.9484
BRD-A36318220	necrostatin-1	RIPK inhibitor|indoleamine 2,3-dioxygenase inhibitor, IDO1|KRR1|RIPK1	8.897	50	50	Agonist and/or Antagonist without cytotox	pQSAR	0.6067	0.6985	0.8425
BRD-K75308783	SAR-245409	PI3K inhibitor, MTOR|PIK3CG	8.99	50	50	Agonist and/or Antagonist without cytotox		0.6649	0.7065	0.8771
BRD-K90699611	acitretin	retinoid receptor agonist|microbial collagenase inhibitor|protein synthesis inhibitor, RARA|RARB|RARG|RBP1|RXRA|RXRB|RXRG|STAT3	9.949	50	50	Agonist and/or Antagonist without cytotox		0.4182	0.7381	0.8314
BRD-K92049597	triamterene	sodium channel blocker, SCNN1A|SCNN1B|SCNN1G|SCNN1D	9.996	50	50	Agonist and/or Antagonist without cytotox		0.3308	0.7908	0.8869
BRD-K78692225	leflunomide	dihydroorotate dehydrogenase inhibitor|PDGFR tyrosine kinase receptor inhibitor|disease modifying antirheumatic drug|immunosuppressant|JAK inhibitor|STAT inhibitor, DHODH|AHR|CYP2C19|JAK3|PTK2B|STAT6	10.71	19.07	50	Agonist and/or Antagonist without cytotox	Known	0.724	0.8597	0.9896
BRD-K32696739	noreleagnine	imidazoline receptor ligand|serotonin receptor ligand, ADRA2A|ADRA2B|ADRA2C|HTR2A|MAOA|MAOB	10.76	50	50	Agonist and/or Antagonist without cytotox	pQSAR	0.5515	0.9072	0.9944
BRD-K29359156	ebselen	COX inihibitor|H+/K+-ATPase inhibitor|leukotriene receptor antagonist|NADPH oxidase inhibitor|nitric oxide synthase inhibitor|PKC inhibitor|prostanoid receptor antagonist|protein kinase C inhibitor|reducing agent, ALB|LTB4R|NOX3	13.03	50	50	Agonist and/or Antagonist without cytotox		0.3682	0.7889	0.8962
BRD-K56558538	ambroxol	glucosylceramidase inhibitor|mucolytic agent|sodium channel blocker, GBA	13.12	50	50	Agonist and/or Antagonist without cytotox		0.3375	0.777	0.8669
BRD-K87024524	phenelzine	monoamine oxidase inhibitor, MAOB|AOC3|MAOA|ABAT|GAD2|GPT|GPT2|SLC6A2|SLC6A3|SLC6A4	13.14	50	50	Agonist and/or Antagonist without cytotox	pQSAR	0.4145	0.8915	0.9867
BRD-K57546357	prunetin	breast cancer resistance protein inhibitor, ABCG2|ALDH2	13.15	33.59	50	Agonist and/or Antagonist without cytotox	pQSAR	0.2325	0.8329	0.9162
BRD-K35458079	edaravone	free radical scavenger, BCL2	13.47	50	50	Agonist and/or Antagonist without cytotox		0.6514	0.7955	0.9586
BRD-A07106394	tryptophan	serotonin receptor modulator, CASR|IDO1|SLC36A1|WARS|WARS2	13.58	50	50	Agonist and/or Antagonist without cytotox	pQSAR	0.2755	0.7946	0.8721
BRD-K78126613	menadione	CDC inhibitor|mitochondrial DNA polymerase inhibitor|phosphatase inhibitor|pyruvate kinase isozyme inhibitor, AOX1|BGLAP|F10|F2|F7|F9|GGCX|NQO1|NQO2|PKM|PROC|PROS1|PROZ|VKORC1|VKORC1L1	13.93	50	50	Agonist and/or Antagonist without cytotox		0.2836	0.7874	0.8629
BRD-K85242180	beta-CCP	indoleamine 2,3-dioxygenase inhibitor, GABRA1|GABRG2|IDO1	14.84	50	50	Agonist and/or Antagonist without cytotox		0.4337	0.7697	0.8888
BRD-K19554809	MK-212	serotonin receptor agonist, HTR2A|HTR2B|HTR2C	17.32	50	50	Agonist and/or Antagonist without cytotox		0.4366	0.7608	0.8767
BRD-K78959463	FPL-64176	calcium channel agonist|L-type calcium channel activator, CACNA1C|CACNA1S	17.63	50	50	Agonist and/or Antagonist without cytotox		0.5255	0.726	0.8541
BRD-K23875128	RHO-kinase-inhibitor-III[rockout]	ROCK inhibitor, IMPDH2|ROCK1	18.37	25.8	50	Agonist and/or Antagonist without cytotox	pQSAR	0.4407	0.7785	0.9027
BRD-K55430733	WAY-629	serotonin receptor agonist, HTR2C	18.38	37.74	50	Agonist and/or Antagonist without cytotox	pQSAR	0.4485	0.8231	0.9511
BRD-K57926513	tyrphostin-AG-1295	FLT3 inhibitor|PDGFR tyrosine kinase receptor inhibitor, FLT3|KDR|PDGFRA|PDGFRB	19.31	24	50	Agonist and/or Antagonist without cytotox		0.4415	0.7677	0.8883
BRD-K08356259	xylometazoline	adrenergic receptor agonist, ADRA2A|ADRA2B|ADRA2C|ADRA1A|ADRA1B|ADRA1D	20.5	50	50	Agonist and/or Antagonist without cytotox	pQSAR	0.3948	0.8006	0.9186
BRD-K11163873	phenanthridone	PARP inhibitor, PARP1	20.59	50	50	Agonist and/or Antagonist without cytotox	pQSAR	0.4709	0.8932	0.9893
BRD-K93258693	GW-9662	PPAR receptor antagonist, PPARG|NCOA2|RXRA	20.61	24.41	50	Agonist and/or Antagonist without cytotox	pQSAR	0.4877	0.8233	0.9565
BRD-K82236179	dicoumarol	NADPH quinone oxidoreductase 1 inhibitor, NQO1|VKORC1|CRYZ	20.81	50	50	Agonist and/or Antagonist without cytotox	pQSAR	0.6695	0.8078	0.9677
BRD-K94649603	taxifolin	apolipoprotein secretion inhibitor|beta amyloid aggregation inhibitor|cholesterol biosynthesis inhibitor|HMGCR inhibitor|NFkB pathway modulator|opioid receptor antagonist|reverse transcriptase inhibitor, APOB|APP|HMGCR	21.24	25.86	50	Agonist and/or Antagonist without cytotox		0.3458	0.785	0.8831
BRD-K76064317	tyrphostin-AG-1296	FLT3 inhibitor, FLT3	21.83	2.195	50	Agonist and/or Antagonist without cytotox		0.5562	0.6966	0.817
BRD-K32526544	DCEBIO	intermediate conductance potassium channel activator, KCNN2|KCNN3|KCNN4	24.12	50	50	Agonist and/or Antagonist without cytotox	pQSAR	0.4457	0.8309	0.9567
BRD-K68804560	benzatropine	anticholinergic, CHRM1|HRH1|SLC6A3	50	0.7602	50	Agonist and/or Antagonist without cytotox	pQSAR	0.3731	0.8108	0.9255
BRD-A25067867	benzatropine	anticholinergic, CHRM1|HRH1|SLC6A3	50	0.8111	50	Agonist and/or Antagonist without cytotox	pQSAR	0.299	0.8172	0.9149
BRD-A62428732	hydroxyzine	histamine receptor antagonist, HRH1	50	1.934	50	Agonist and/or Antagonist without cytotox		0.5597	0.7246	0.8646
BRD-K22936972	diphenylpyraline	dopamine reuptake inhibitor|histamine receptor antagonist, HRH1|SLC6A3	50	2.435	50	Agonist and/or Antagonist without cytotox	pQSAR	0.4314	0.8196	0.9455
BRD-K36627727	tamibarotene	retinoid receptor agonist|RAR agonist, RARA|RARB	50	2.44	50	Agonist and/or Antagonist without cytotox	pQSAR	0.3962	0.8673	0.9751
BRD-A57133233	chlorcyclizine	histamine receptor antagonist, HRH1	50	4.006	50	Agonist and/or Antagonist without cytotox	pQSAR	0.481	0.816	0.9499
BRD-K79501723	cyclizine	histamine receptor modulator, HRH1|SULT1E1	50	4.301	50	Agonist and/or Antagonist without cytotox	pQSAR	0.7413	0.8644	0.9912
BRD-K61323504	SB-225002	CC chemokine receptor antagonist|Chemokine CXCR2 (IL-8 beta Receptor) Antagonists, CXCR2	50	5.766	50	Agonist and/or Antagonist without cytotox		0.2251	0.7922	0.8425
BRD-K93441486	diphemanil	acetylcholine receptor antagonist, CHRM3	50	6.004	50	Agonist and/or Antagonist without cytotox	pQSAR	0.3183	0.8793	0.9755
BRD-K64451768	GANT-58	GLI antagonist, DHH|GLI1|IHH	50	6.095	50	Agonist and/or Antagonist without cytotox	pQSAR	0.4995	0.8259	0.9597
BRD-K80738081	resveratrol	apolipoprotein expression enhancer|beta-secretase inhibitor|cyclooxygenase inhibitor|cytochrome P450 inhibitor|lipid peroxidase inhibitor|MAP kinase inhibitor|monoamine oxidase inhibitor|NFkB pathway modulator|SIRT activator|SIRT pathway|SIRT stimulant|sodium channel blocker|thioredoxin reductase inhibitor|topoisomerase inhibitor|xanthine oxidase inhibitor, PTGS1|PTGS2|SIRT1|APOA1|BACE1|CSNK2A1|M…	50	7.904	50	Agonist and/or Antagonist without cytotox		0.2108	0.7951	0.8401
BRD-K18678457	ZD-7288	HCN (hyperpolarization activated cyclic nucleotide gated) channel blocker|HCN channel antagonist|potassium channel antagonist|sodium channel blocker, HCN1|HCN2|HCN3|HCN4	50	9.053	50	Agonist and/or Antagonist without cytotox		0.4075	0.7995	0.9202
BRD-K33583600	isoliquiritigenin	guanylate cyclase activator|aldose reductase inhibitor|glutamate receptor antagonist|histamine receptor antagonist|SIRT activator, AKR1B1|HRH2|SIRT1	50	13.47	50	Agonist and/or Antagonist without cytotox		0.467	0.7153	0.8106
BRD-K75958195	pizotifen	serotonin receptor antagonist, HTR2A|HTR1A|HTR2C	50	14.29	50	Agonist and/or Antagonist without cytotox		0.5204	0.7994	0.9421
BRD-K31843556	T-0070907	PPAR receptor anatagonist|PPAR receptor antagonist, PPARG	50	14.48	50	Agonist and/or Antagonist without cytotox	pQSAR	0.2432	0.8138	0.8911
BRD-A94669766	naringenin	aromatase inhibitor|estrogen receptor agonist|quorum sensing signaling modulator|TRPM3 antagonist, CYP19A1|ESR2|CYP1B1|GLO1|HSD17B1	50	14.99	50	Agonist and/or Antagonist without cytotox		0.544	0.7617	0.909
BRD-K74927006	cinnarizine	calcium ion channel antagonist|histamine receptor antagonist, HRH1|CACNA1C|CACNA1D|CACNA1F|CACNA1G|CACNA1H|CACNA1I|CACNA1S|CHRM1|CHRM2|CHRM3|CHRM4|CHRM5|DRD1|DRD2|DRD5	50	18.26	50	Agonist and/or Antagonist without cytotox	pQSAR	0.882	0.8152	0.9892
BRD-K96799727	pifithrin-mu	HSP inhibitor, HSPA1A|TP53	50	18.3	50	Agonist and/or Antagonist without cytotox	pQSAR	0.4024	0.8597	0.9714
BRD-K06854232	AM-580	RAR agonist|retinoid receptor agonist, RARA	50	18.51	50	Agonist and/or Antagonist without cytotox	pQSAR	0.1647	0.8438	0.9064
BRD-A01078468	hexestrol	synthetic estrogen, inhibitor of microtubule polymerization, ESR1|AKR1C1|ESR2	50	18.72	50	Agonist and/or Antagonist without cytotox	pQSAR	0.2509	0.8849	0.9727
BRD-K17084514	diethylstilbestrol	estrogen receptor agonist|chloride channel blocker, ESR1|ESR2|ESRRG|ESRRB	50	19.77	50	Agonist and/or Antagonist without cytotox	pQSAR	0.2566	0.8232	0.9103
BRD-K69690935	curcumin	cyclooxygenase inhibitor|AP inhibitor|CCN expression inhibitor|DNA methyltransferase inhibitor|EGFR expression inhibitor|free radical scavenger|FtsZ inhibitor|glucose 6 phosphatase inhibitor|histone N-acetyltransferase inhibitor|HIV integrase inhibitor|lipoxygenase inhibitor|NFkB pathway inhibitor|tau aggregation inhibitor|unidentified pharmacological activity, PTGS1|PTGS2|APP|CA1|CA12|CA14|CA2|C…	50	21.61	50	Agonist and/or Antagonist without cytotox	pQSAR	0.3876	0.8509	0.9643
BRD-K14329163	BAY-K8644	L-type calcium channel activator, CACNA1C	50	23.88	50	Agonist and/or Antagonist without cytotox	pQSAR	0.3301	0.818	0.924
BRD-K44084986	Y-27632	ROCK inhibitor|calcium sensitizer|leucine rich repeat kinase inhibitor, ROCK1|ROCK2|LRRK2|PKIA|PKN2|PRKACA|PRKCE	50	24.55	50	Agonist and/or Antagonist without cytotox		0.4407	0.7324	0.8308
BRD-K23383398	T-0901317	LXR agonist|ABC transporter expression enhancer|ROR inverse agonist, NR1H3|NR1H2|ABCA1|NCOA1|NCOA2|NR1I2|RORA|RORC|RXRB	50	25.59	50	Agonist and/or Antagonist without cytotox		0.6574	0.6759	0.8284
BRD-K16621777	enobosarm	androgen receptor modulator|androgen receptor agonist, AR	50	27.11	50	Agonist and/or Antagonist without cytotox	pQSAR	0.5648	0.8755	0.9875
BRD-K28143534	cyproheptadine	histamine receptor antagonist|serotonin receptor antagonist, HRH1|ADRA1A|ADRA1B|ADRA1D|CHRM1|CHRM2|CHRM3|HTR2A|HTR2B|HTR2C|HTR6|HTR7	50	27.14	50	Agonist and/or Antagonist without cytotox	pQSAR	0.4224	0.8377	0.9589
BRD-K60762818	desipramine	norepinephrine transporter inhibitor|Sodium Channel Blockers|tricyclic antidepressant (TCA), SLC6A2|SLC6A4|ADRA1A|ADRA1B|ADRA1D|ADRA2A|ADRA2B|ADRA2C|ADRB1|ADRB2|CHRM1|CHRM2|CHRM3|CHRM4|CHRM5|DRD2|HRH1|HTR1A|HTR2A|HTR2C|SMPD1	50	28	50	Agonist and/or Antagonist without cytotox	pQSAR	0.4095	0.8153	0.9376
BRD-K21955335	carbenoxolone	11-beta hydroxysteroid dehydrogenase inhibitor, HSD11B1|GJA1|GJA10|GJA3|GJA4|GJA5|GJA8|GJA9|GJB1|GJB2|GJB3|GJB4|GJB5|GJB6|GJB7|GJC1|GJC2|GJC3|GJD2|GJD3|GJD4|GJE1|PANX1|PANX2|PANX3	50	30.67	50	Agonist and/or Antagonist without cytotox		0.5232	0.7019	0.8114
BRD-K39120595	bithionol	autotaxin inhibitor, ESR1|ESR2|MCL1	50	30.76	50	Agonist and/or Antagonist without cytotox		0.475	0.7526	0.8771
BRD-K55344148	BU-224	imidazoline receptor ligand, MAOA|MAOB	50	41.47	50	Agonist and/or Antagonist without cytotox	pQSAR	0.392	0.8473	0.9623
BRD-K93201660	ML-7	myosin light chain kinase inhibitor, MYLK	50	47.32	50	Agonist and/or Antagonist without cytotox		0.6509	0.7087	0.8749
