# Supplementary material for: Drug target prediction through deep learning functional representation of gene signatures
Source: Research Square preprint supplement (doi:10.21203/rs.3.rs-3371688/v1), 2023-09-28
Supplement: Supplementary file 7 [file e4756dfa23107f3549906a32.xlsx]

## Sheet: Table S4. KinaseDoseResponse
Table S4. Dose-response confirmation rates for 191 compounds across 9 kinase assays.
Target	Compounds Predicted to be Binders				Compounds Not Predicted to be Binders				P-value	Enrichment Factor
	Total Compounds Predicted	#Hits	Confirmation Rate (CR)	STDV of CR	Total Compounds Not Predicted	#Hits	Confirmation Rate (CR)	STDV of CR
BRAF	44	25	0.57	0.075	301	10	0.033	0.01	4.5e-27	17.2727
CDK4	56	37	0.66	0.063	291	46	0.16	0.021	1.4e-15	4.125
EGFR	147	70	0.48	0.041	255	6	0.024	0.0095	1.4e-28	20
GSK3B	66	49	0.74	0.054	281	10	0.036	0.011	2.9e-42	20.5556
KIT	92	49	0.53	0.052	256	18	0.07	0.016	1.1e-21	7.57143
PDGFRA	238	165	0.69	0.03	160	29	0.18	0.03	1.7e-23	3.83333
PRKCA	65	42	0.65	0.059	280	50	0.18	0.023	2.7e-14	3.61111
RET	139	105	0.76	0.036	210	36	0.17	0.026	2.3e-27	4.47059
ROCK1	45	37	0.82	0.057	305	26	0.085	0.016	1.8e-32	9.64706
